# Supplementary material
Source: PubMed Central journal article supplement (PMC7734799)
Supplement: ml0c00381_si_001.pdf [file ml0c00381_si_001.pdf]

## Supporting Information

# Semisynthetic Analogs of the Antibiotic Fidaxomicin – Design, Synthesis, and Biological Evaluation

Andrea Dorst,<sup>‡a</sup> Regina Berg,<sup>‡a</sup> Christoph G. W. Gertzen,<sup>b</sup> Daniel Schäfle,<sup>c</sup> Katja Zerbe,<sup>a</sup>

Myriam Gwerder,<sup>a</sup> Simon D. Schnell,<sup>a</sup> Peter Sander,<sup>c,d</sup> Holger Gohlke,<sup>b</sup> and Karl Gademann<sup>\*a</sup>

<sup>a</sup> Department of Chemistry, University of Zurich, Winterthurerstrasse 190, 8057 Zürich, Switzerland.

E-mail: [karl.gademann@chem.uzh.ch](mailto:karl.gademann@chem.uzh.ch)

<sup>b</sup> Institute for Pharmaceutical and Medicinal Chemistry, Heinrich Heine University Düsseldorf, Universitätsstr. 1, 40225 Düsseldorf and John von Neumann Institute for Computing (NIC), Institute of Biological Information Processing (IBI-7: Structural Biochemistry) & Jülich Supercomputing Centre (JSC), Forschungszentrum Jülich, 52425 Jülich, Germany.

<sup>c</sup> Institute of Medical Microbiology, University of Zurich, Gloriastrasse 28/30, 8006 Zurich, Switzerland

<sup>d</sup> National Center for Mycobacteria, University of Zurich, Gloriastrasse 28/30, 8006 Zurich, Switzerland

<sup>‡</sup> These authors contributed equally to this work.

# Table of Content

|                                                                                                        |           |
|--------------------------------------------------------------------------------------------------------|-----------|
| <b>Synthesis of Fidaxomicin Derivatives</b> .....                                                      | <b>4</b>  |
| General Experimental .....                                                                             | 4         |
| Fidaxomicin Acetamide ( <b>2a</b> ) and Fidaxomicin Bis(acetamide) ( <b>2b</b> ) .....                 | 6         |
| Fidaxomicin Dimethylacetamide ( <b>3a</b> ) and Fidaxomicin Bis(dimethylacetamide) ( <b>3b</b> ) ..... | 8         |
| Fidaxomicin Ethylacetat ( <b>4a</b> ) and Fidaxomicin Bis(ethylacetate) ( <b>4b</b> ).....             | 10        |
| Allyl 4-(2-chloroacetyl)piperazine-1-carboxylate <sup>2</sup> .....                                    | 12        |
| Allyl 4-(2-iodoacetyl)piperazine-1-carboxylate .....                                                   | 13        |
| Fidaxomicin Piperazine and Fidaxomicin Di(piperazine) with alloc Protecting Group.....                 | 14        |
| Fidaxomicin Piperazine ( <b>5a</b> ) .....                                                             | 16        |
| Fidaxomicin Dipiperazine ( <b>5b</b> ) .....                                                           | 17        |
| 1-(4-Hydroxypiperidin-1-yl)-2-iodoethan-1-one.....                                                     | 18        |
| Fidaxomicin Piperidin-4-ol ( <b>6a</b> ) and Fidaxomicin Di(piperidin-4-ol) ( <b>6b</b> ) .....        | 19        |
| 2,5,8,11,14,17-Hexaoxonadecan-19-yl 4-nitrobenzenesulfonate .....                                      | 21        |
| HEG-Fidaxomicin ( <b>7a</b> ) and Bis(HEG)-Fidaxomicin ( <b>7b</b> ) .....                             | 22        |
| SuFEx-Fidaxomicin ( <b>8</b> ) .....                                                                   | 25        |
| Tetrazine-Fidaxomicin ( <b>9b</b> ).....                                                               | 27        |
| 3-Azidopropan-1-ol <sup>7</sup> .....                                                                  | 28        |
| 3-Azidopropyl 4-nitrobenzenesulfonate <sup>8</sup> .....                                               | 28        |
| Mono(azidopropyl)fidaxomicin ( <b>10a</b> ) and Bis(azidopropyl)fidaxomicin ( <b>10b</b> ).....        | 30        |
| Monotriazole ( <b>11a</b> ) and Bistriazole with Ethynylaniline ( <b>11b</b> ).....                    | 32        |
| Monotriazole with PEG5-acid ( <b>12a</b> ) .....                                                       | 35        |
| Monotriazole with Piperidin-4-amine Substituent ( <b>13a</b> ) .....                                   | 37        |
| Ditriazole with Piperidin-4-amine Substituent ( <b>13b</b> ).....                                      | 38        |
| Bromoacetyl ciprofloxacin ( <b>14</b> ).....                                                           | 39        |
| Fidaxomicin-Ciprofloxacin Hybrid ( <b>15</b> ).....                                                    | 40        |
| 23-Azido-3,6,9,12,15,18,21-heptaotricosyl 4-Nitrobenzenesulfonate ( <b>16</b> ) .....                  | 43        |
| Fidaxomicin-OEG-Azide ( <b>17</b> ) .....                                                              | 44        |
| 1-Nitrosopiperazine .....                                                                              | 45        |
| 1-Nitroso-4-propargylpiperazine .....                                                                  | 46        |
| 1-Amino-4-propargylpiperazine.....                                                                     | 47        |
| Alkynylated Rifampicin ( <b>18</b> ) .....                                                             | 48        |
| Fidaxomicin-Rifampicin Hybrid ( <b>19</b> ).....                                                       | 49        |
| <b>Homology Modeling, Molecular Docking, and Molecular Modeling</b> .....                              | <b>51</b> |
| <b>General Procedure for Determination of Aqueous Solubility by UHPLC Analysis</b> .....               | <b>54</b> |
| <b>Antimicrobial Susceptibility Testing</b> .....                                                      | <b>55</b> |
| General procedure for the determination of MIC values of <i>B. subtilis</i> and <i>S. aureus</i> ..... | 55        |
| General procedure for the determination of MIC values of <i>M. tuberculosis</i> .....                  | 55        |
| General procedure for the determination of MIC values of <i>C. difficile</i> .....                     | 56        |
| <b>References</b> .....                                                                                | <b>59</b> |
| <b>NMR spectra</b> .....                                                                               | <b>61</b> |

## Synthesis of Fidaxomicin Derivatives

### General Experimental

Unless otherwise stated, all chemicals were of reagent grade and purchased from *Sigma-Aldrich*, *Merck*, *Fluorochem*, *Honeywell*, or *Thommen Furler AG*. Fidaxomicin was either obtained by fermentation from *Actinoplanes deccanensis* (ATCC 21983) or purchased from commercial suppliers. Reactions were carried out under protecting gas (N<sub>2</sub> or Ar) in oven-dried (120 °C) glass equipment and monitored for completion by TLC or UHPLC-MS (ESI). Solvents for reactions were of p.a. grade. Evaporation of solvents *in vacuo* was carried out on a rotary evaporator at 40 °C bath temperature and appropriate pressure. Fidaxomicin was purchased from commercial suppliers. **Thin layer chromatography** (TLC): *Merck* TLC plates silica gel 60 on glass with the indicated solvent system; the spots were visualized by UV light (254 nm) and cerium ammonium molybdate or KMnO<sub>4</sub> stain. **Ultra high-performance liquid chromatography coupled to mass spectrometry** (UHPLC-MS): *Ultimate 3000 LC* instrument (*Thermo Fisher Scientific*) coupled to a triple quadrupole *Quantum Ultra EMR MS* (*Thermo Fisher Scientific*) using a reversed-phase column (*Kinetex*<sup>®</sup> EVO C18; 1.7 μm; 100 Å, 50 x 2.1 mm; *Phenomenex*). The LC was equipped with an *HPG-3400RS* pump, a *WPS-3000TRS* autosampler, a *TCC-3000RS* column oven and a *Vanquish DAD* detector (all *Thermo Fisher Scientific*). The following solvents were applied: H<sub>2</sub>O + 0.1 % HCOOH (A), MeCN + 0.1 % HCOOH (B). Samples were prepared using HPLC grade solvents (MeCN, MeOH, H<sub>2</sub>O) and filtered over a 4 mm syringe filter, PTFE (hydrophilic), pore size: 0.22 μm obtained from BGB Analytik AG. The MS was equipped with an H-ESI II ion source. The source temperature was 250 °C, the capillary temperature 270 °C and capillary voltage 3500 V, and datasets were acquired at resolution 0.7 on Q3 in centroid mode. **High-performance liquid chromatography** (HPLC):

*Prominence* modular HPLC instrument (*Shimadzu*) coupled to an *SPD-20A* UV/Vis detector (*Shimadzu*) using a reversed-phase column (*Gemini-NX C18*, 3 μm, 10 Å, 150 mm x 4.6 mm; *Phenomenex*, *Synergy Hydro*) for analytical HPLC, and a reversed-phase column (*Gemini NX C18*, 5 μm, 110 Å, 250 mm x 21.2 mm; *Phenomenex Synergi Hydro-RP*, 10 μ, 80 Å, 250 mm x 21.2 mm; *Phenomenex Synergi Hydro-RP*, 10 μ, 80 Å, 250 mm x 4.60 mm) for (semi-) preparative HPLC. The LC was equipped with a *CBM-20A* system controller, *LC-20A* solvent delivery unit, a *DGU-20A* degassing unit, *FRC-10A* fraction collector (all *Shimadzu*). The following solvents were used: H<sub>2</sub>O + 0.1 % HCOOH (A), MeCN + 0.1 % HCOOH (B). **Specific optical rotation**  $[\alpha]_D^T$ : *Jasco P-2000 Polarimeter*; measured at the indicated temperature *T*. All given values for  $[\alpha]_D^T$  have the dimension ° mL dm<sup>-1</sup> g<sup>-1</sup>. **Infrared spectra** (IR): *SpectrumTwo FT-IR Spectrometer* (*Perkin-Elmer*) equipped with a *Specac Golden Gate™* ATR (attenuated total reflection) accessory; applied as neat samples or as films; 1/λ in cm<sup>-1</sup>. **UV-Vis Spectroscopy**: UV-Vis spectra were measured in the spectral region from λ = 200 nm to λ = 800 nm on the instrument *Shimadzu UV Spectrophotometer*, model: UV-1800 240V IVDD, using quartz cuvettes of length d = 1 cm. **Nuclear magnetic resonance spectra** (NMR): <sup>1</sup>H NMR spectra were recorded in CDCl<sub>3</sub>, CD<sub>2</sub>Cl<sub>2</sub>, CD<sub>3</sub>OD, acetone-*d*<sub>6</sub> or DMSO-*d*<sub>6</sub> on the instruments *Bruker AV-600* (600 MHz), *AV-500* (500 MHz) or *AV-400* (400 MHz); chemical shift δ in ppm relative

to solvent signals ( $\delta = 7.26$  ppm for  $\text{CDCl}_3$ , 5.32 ppm for  $\text{CD}_2\text{Cl}_2$ , 3.31 ppm for  $\text{CD}_3\text{OD}$ , 2.05 ppm for acetone- $d_6$  and 2.50 for DMSO- $d_6$ ),<sup>1</sup> coupling constant  $J$  is given in Hz.  $^{13}\text{C}$  NMR spectra were recorded in  $\text{CDCl}_3$ ,  $\text{CD}_2\text{Cl}_2$ ,  $\text{CD}_3\text{OD}$ , acetone- $d_6$  or DMSO- $d_6$  on the instruments *Bruker AV-600* (150 MHz), *AV-500* (125 MHz) or *AV-400* (100 MHz); chemical shift  $\delta$  in ppm relative to solvent signals ( $\delta = 77.16$  ppm for  $\text{CDCl}_3$ , 53.84 ppm for  $\text{CD}_2\text{Cl}_2$ , 49.00 ppm for  $\text{CD}_3\text{OD}$ , 29.84 ppm for acetone- $d_6$  and 39.52 for DMSO- $d_6$ );<sup>1</sup> multiplicities from DEPT-135 experiments. **High-resolution electrospray ionization mass spectra (HRMS):** *QExactive* (*Thermo Fisher Scientific*) with a heated ESI source connected to a *Dionex Ultimate 3000* UHPLC system. Samples dissolved in MeOH; injection on-flow with an auto-sampler (mobile phase: MeOH + 0.1 % HCOOH or MeCN/H<sub>2</sub>O 2:8 + 0.1 % HCOOH; flow rate: 120  $\mu\text{L}/\text{min}$ ); ion source parameters: spray voltage 3.0 kV, capillary temperature 320 °C, sheath gas rate: 5 L/min, s-lens RF level 55.0; full scan MS in alternating (+)/(-)-ESI mode; mass ranges 80–1200, 133–2000, or 200–3000 amu; resolution (full width half-maximum) 70'000; automatic gain control (AGC) target  $3.00 \cdot 10^6$ ; maximum allowed ion transfer time (IT) 30 ms; mass calibration <2 ppm accuracy for  $m/z$  130.06619–1621.96509 in (+)-ESI and for  $m/z$  265.14790–1779.96528 in (-)-ESI with *Pierce*® ESI calibration solutions (*Thermo Fisher Scientific*); lock masses: ubiquitous erucamide ( $m/z$  338.34174, (+)-ESI) and palmitic acid ( $m/z$  255.23295, (-)-ESI).

## Fidaxomicin Acetamide (**2a**) and Fidaxomicin Bis(acetamide) (**2b**)

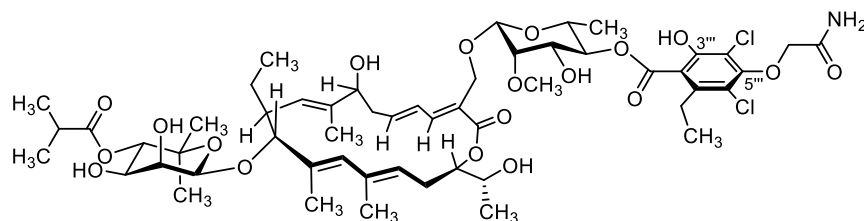

**2a**

Chemical Formula: C<sub>54</sub>H<sub>77</sub>Cl<sub>2</sub>NO<sub>19</sub>

Exact Mass: 1113.4467

Molecular Weight: 1115.0980

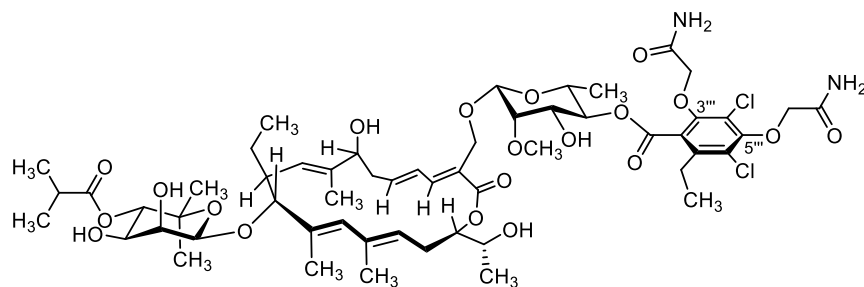

**2b**

Chemical Formula: C<sub>56</sub>H<sub>80</sub>Cl<sub>2</sub>N<sub>2</sub>O<sub>20</sub>

Exact Mass: 1170.4681

Molecular Weight: 1172.1500

In a flame-dried flask under argon atmosphere, fidaxomicin (**1**, 100 mg, 94.5  $\mu$ mol, 1.0 equiv.) and K<sub>2</sub>CO<sub>3</sub> (52.2 mg, 0.378 mmol, 4.0 equiv.) were dissolved in dry DMF (1.2 mL). Iodoacetamide (22.7 mg, 0.123 mmol, 1.3 equiv.) was added and the yellow reaction mixture was stirred at 45 °C for 5 hours. The reaction mixture was diluted with EtOAc (2.0 mL) and a saturated aqueous solution of NH<sub>4</sub>Cl (3.0 mL) was added. The layers were separated and the aqueous layer was extracted with EtOAc (3x). The combined organic phases were washed with a saturated aqueous solution of NaCl (3x) and dried over anhydrous MgSO<sub>4</sub>. After filtration of the drying agent, the solvent was evaporated under reduced pressure to afford a mixture of mono- and disubstituted fidaxomicin acetamide. The two compounds **2a** and **2b** were separated by preparative RP-HPLC (Gemini NX C18, 10  $\mu$ , 110 Å, 250 mm x 21.2 mm; solvent A: H<sub>2</sub>O+0.1 % HCOOH, solvent B: MeCN+0.1 % HCOOH; 20 mL/min; 47 % B for 50 min) to afford **2a** ( $t_R$  = 16.25 min, 24.0 mg, 21.5  $\mu$ mol, 23 %) and **2b** ( $t_R$  = 9.50 min, 6.0 mg, 5.1  $\mu$ mol, 5 %) as colourless solids after lyophilization.

## 2a

**R<sub>f</sub>** (pentane/acetone 1:4) = 0.44; **Specific Rotation**  $[\alpha]_D^{25^\circ\text{C}} = -91.31$  ( $\beta = 0.61$  g/100 mL, CHCl<sub>3</sub>); **FT-IR**  $\tilde{\nu}$  (film) 3474, 2974, 2936, 1734, 1689, 1383, 1247, 1070, 1028, 904 cm<sup>-1</sup>; **<sup>1</sup>H NMR** (500 MHz, acetone-*d*<sub>6</sub>)  $\delta$  7.23 (d, *J* = 11.5 Hz, 1H), 7.21 (s, 1H), 6.91 (s, 1H), 6.63 (m, 1H), 5.96 (ddd, *J* = 14.5, 9.9, 5.1 Hz, 1H), 5.83 (s, 1H), 5.62 (t, *J* = 8.3 Hz, 1H), 5.21 (d, *J* = 10.5 Hz, 1H), 5.07 (t, *J* = 9.7 Hz, 1H), 5.00 (d, *J* = 10.1 Hz, 1H), 4.77 (s, 1H), 4.73 (q, *J* = 5.4 Hz, 1H), 4.67 (s, 1H), 4.60 (d, *J* = 11.4 Hz, 1H), 4.47 (s, 2H), 4.41 (d, *J* = 11.4 Hz, 1H), 4.27 (br m, 1H), 4.10–3.99 (m, 1H), 3.96 (d, *J* = 3.3 Hz, 1H), 3.85 (s, br, 1H), 3.79–3.71 (m, 3H), 3.61 (d, *J* = 3.4 Hz, 1H), 3.60–3.54 (m, 1H), 3.52 (s, 3H), 2.95–2.83 (m, 2H), 2.79–2.60 (m, 3H), 2.56 (sept, *J* = 7.1 Hz, 1H), 2.53–2.39 (m, 2H), 1.99–1.90 (m, 1H), 1.81 (s, 3H), 1.73 (s, 3H), 1.65 (s, 3H), 1.33 (d, *J* = 6.1 Hz, 3H), 1.30–1.22 (m, 1H), 1.21–1.07 (m, 15H), 1.09 (s, 3H), 0.82 (t, *J* = 7.1 Hz, 3H) ppm; **<sup>13</sup>C NMR** (126 MHz, acetone-*d*<sub>6</sub>)  $\delta$  176.8, 169.7, 167.8, 167.5, 153.4, 153.1, 145.4, 143.4, 141.4, 136.9, 136.1, 133.8, 128.1, 126.3, 125.3, 123.9, 120.4, 119.1, 115.7, 101.8, 96.7, 93.3, 81.5, 78.2, 77.5, 75.7, 73.8, 72.84, 72.78, 72.4, 71.8, 70.6, 70.1, 67.7, 63.4, 61.7, 42.0, 37.2, 34.8, 28.7, 28.3, 26.5, 25.8, 20.7, 19.4, 19.2, 18.6, 18.1, 17.5, 15.2, 14.5, 13.8, 11.2 ppm; **HRMS** ESI<sup>-</sup> (MeOH), calculated for C<sub>54</sub>H<sub>76</sub>Cl<sub>2</sub>NO<sub>19</sub> [M-H]<sup>-</sup>: 1112.43941, found: 1112.44043.

## 2b

**R<sub>f</sub>** (pentane/acetone 1:4) = 0.38; **Specific Rotation**  $[\alpha]_D^{25^\circ\text{C}} = -25.68$  ( $\beta = 0.48$  g/100 mL, CHCl<sub>3</sub>); **FT-IR**  $\tilde{\nu}$  (film) 3474, 2977, 2935, 1734, 1688, 1406, 1253, 1069, 1026 cm<sup>-1</sup>; **<sup>1</sup>H NMR** (500 MHz, acetone-*d*<sub>6</sub>)  $\delta$  7.25 (d, *J* = 11.5 Hz, 1H), 7.20 (s, 2H), 7.17 (s, 1H), 6.90 (s, 1H), 6.86 (s, 1H), 6.61 (dd, *J* = 14.9, 11.9 Hz, 1H), 5.96 (ddd, *J* = 14.4, 10.0, 4.9 Hz, 1H), 5.82 (s, 1H), 5.63 (t, *J* = 8.3 Hz, 1H), 5.21 (d, *J* = 10.5 Hz, 1H), 5.05 (t, *J* = 9.6 Hz, 1H), 4.99 (d, *J* = 10.1 Hz, 1H), 4.77 (s, 1H), 4.73 (q, *J* = 5.1 Hz, 1H), 4.60 (s, 1H), 4.58–4.52 (m, 2H), 4.49 (s, 3H), 4.45–4.39 (m, 2H), 4.28 (m, br, 1H), 4.07–4.00 (m, 3H), 3.97–3.94 (m, 1H), 3.87–3.82 (m, 2H), 3.76–3.67 (m, 3H), 3.57–3.51 (m, 2H), 3.52 (s, 3H), 3.26 (d, *J* = 9.4 Hz, 1H), 2.87–2.76 (m, 2H), 2.76–2.60 (m, 3H), 2.56 (sept, *J* = 7.0 Hz, 1H), 2.52–2.46 (m, 1H), 2.46–2.40 (m, 1H), 1.98–1.88 (m, 1H), 1.81 (d, *J* = 1.2 Hz, 3H), 1.71 (d, *J* = 1.3 Hz, 3H), 1.65 (s, 3H), 1.34 (d, *J* = 6.1 Hz, 3H), 1.30–1.21 (m, 1H), 1.21–1.07 (m, 15H), 1.09 (s, 3H), 0.82 (t, *J* = 7.5 Hz, 3H) ppm; **<sup>13</sup>C NMR** (126 MHz, acetone-*d*<sub>6</sub>)  $\delta$  176.8, 169.9, 169.6, 167.7, 166.1, 153.1, 150.9, 145.7, 143.7, 140.6, 136.8, 136.11, 136.05, 133.7, 128.6, 128.0, 126.24, 126.23, 125.0, 123.9, 121.7, 101.1, 96.8, 93.3, 81.8, 78.1, 78.0, 75.7, 73.8, 73.6, 72.83, 72.81, 72.3, 72.0, 70.6, 70.2, 67.7, 62.9, 61.7, 42.0, 37.4, 34.8, 28.7, 28.3, 26.5, 25.7, 20.8, 19.4, 19.2, 18.6, 18.4, 17.5, 15.2, 14.3, 13.8, 11.2 ppm; **HRMS** ESI<sup>+</sup>, (MeOH) calculated for C<sub>56</sub>H<sub>80</sub>Cl<sub>2</sub>N<sub>2</sub>O<sub>20</sub>Na [M+Na]<sup>+</sup>: 1193.45737, found: 1193.45811.

### Fidaxomicin Dimethylacetamide (3a) and Fidaxomicin Bis(dimethylacetamide) (3b)

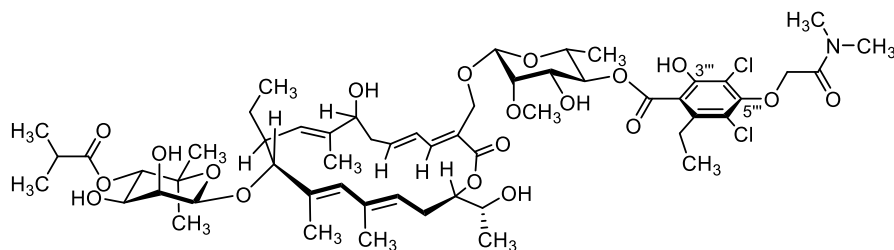

**3a**

Chemical Formula: C<sub>56</sub>H<sub>81</sub>Cl<sub>2</sub>NO<sub>19</sub>

Exact Mass: 1141.4780

Molecular Weight: 1143.1520

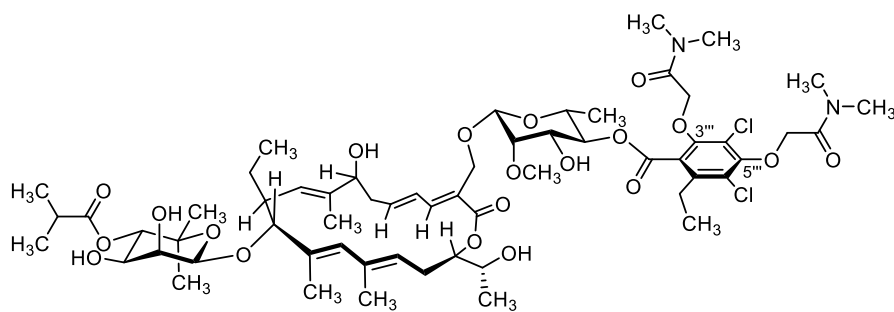

**3b**

Chemical Formula: C<sub>60</sub>H<sub>88</sub>Cl<sub>2</sub>N<sub>2</sub>O<sub>20</sub>

Exact Mass: 1226.5307

Molecular Weight: 1228.2580

An flame-dried flask was charged with fidaxomicin (**1**, 20.0 mg, 18.9  $\mu$ mol, 1.0 equiv.) and K<sub>2</sub>CO<sub>3</sub> (10.4 mg, 75.6  $\mu$ mol, 4.0 equiv.) was added under argon atmosphere. The solids were dissolved in dry DMF (0.8 mL) and 2-iodo-*N,N*-dimethylacetamide (4  $\mu$ L, 34  $\mu$ mol, 1.8 equiv.) was added. The dark brown mixture was stirred at 45 °C for 7 hours. The reaction mixture was diluted with EtOAc (1.0 mL) and a saturated aqueous solution of NH<sub>4</sub>Cl (1.0 mL) was added. The phases were separated and the aqueous phase was extracted with EtOAc (3x). The combined organic layers were washed with a saturated aqueous solution of NaCl (2x) and dried over anhydrous MgSO<sub>4</sub>. After filtration of the drying agent, the solvent was evaporated under reduced pressure. A mixture of mono- and disubstituted fidaxomicin-*N,N*-dimethylacetamide **3a** and **3b** was obtained. The two compounds were separated by RP-HPLC (Gemini NX C18, 10  $\mu$ , 110 Å, 250 mm x 21.2 mm; solvent A: H<sub>2</sub>O+0.1 % HCOOH, solvent B: MeCN+0.1 % HCOOH; 20 mL/min; 47 % B for 50 min) to afford, after lyophilization, **3a** ( $t_R$  = 23.83 min, 9.5 mg, 8.3  $\mu$ mol, 44 %) and **3b** ( $t_R$  = 16.88 min, 8.5 mg, 6.9  $\mu$ mol, 37 %) as colourless solids.

### 3a

**R<sub>f</sub>** (pentane/acetone 1:4) = 0.84; **Specific Rotation**  $[\alpha]_D^{24^\circ C} = -18.53$  ( $\beta = 0.17$  g/100 mL, CHCl<sub>3</sub>); **FT-IR**  $\tilde{\nu}$  (film) 3423, 2976, 2934, 1700, 1644, 1384, 1244, 1200, 1069, 1028, 901, 800 cm<sup>-1</sup>; **<sup>1</sup>H NMR** (500 MHz, acetone-*d*<sub>6</sub>)  $\delta$  7.23 (d, *J* = 11.5 Hz, 1H), 6.68–6.58 (m, 1H), 5.96 (ddd, *J* = 14.6, 9.5, 4.6 Hz, 1H), 5.83 (s, 1H), 5.62 (t, *J* = 8.3 Hz, 1H), 5.21 (d, *J* = 10.4, 1H), 5.06 (t, *J* = 9.7 Hz, 1H), 4.99 (d, *J* = 10.2 Hz, 1H), 4.79–4.69 (m, 1H), 4.73 (s, 2H), 4.66 (s, 1H), 4.58 (d, *J* = 11.5 Hz, 1H), 4.41 (d, *J* = 11.5 Hz, 1H), 4.27 (m, br, 1H), 4.06–3.99 (m, 1H), 3.98–3.93 (m, 1H), 3.79–3.69 (m, 3H), 3.62–3.54 (m, 2H), 3.52 (s, 3H), 3.17 (s, 3H), 2.93 (s, 3H), 2.91–2.70 (m, 3H), 2.70–2.67 (m, 1H), 2.67–2.63 (m, 1H), 2.56 (sept, *J* = 6.9 Hz, 1H), 2.54–2.47 (m, 1H), 2.53–2.40 (ddd, *J* = 13.9, 9.2, 4.5 Hz, 1H), 1.98–1.89 (m, 1H), 1.81 (s, 3H), 1.73 (s, 3H), 1.66 (s, 3H), 1.33 (d, *J* = 6.2 Hz, 3H), 1.28–1.21 (m, 1H), 1.21–1.12 (m, 15H), 1.09 (s, 3H), 0.82 (t, *J* = 7.4 Hz, 2H) ppm; **<sup>13</sup>C NMR** (126 MHz, acetone-*d*<sub>6</sub>)  $\delta$  176.8, 167.83, 167.77, 166.8, 154.4, 151.7, 145.4, 143.4, 141.3, 136.9, 136.12, 136.10, 133.8, 128.2, 126.4, 125.3, 124.0, 120.3 (from HMBC), 118.9 (from HMBC), 115.8, 101.8, 96.8, 93.3, 81.6, 78.2, 77.5, 75.7, 73.8, 72.8, 72.7, 72.4, 72.2, 70.6, 70.2, 67.7, 63.4, 61.7, 42.0, 37.3, 36.7, 35.3, 34.8, 28.7, 28.4, 26.5, 25.9, 20.7, 19.4, 19.2, 18.6, 18.1, 17.5, 15.2, 14.5, 13.8, 11.2 ppm; **HRMS** ESI<sup>-</sup> (MeOH), calculated for C<sub>56</sub>H<sub>80</sub>Cl<sub>2</sub>NO<sub>19</sub> [M-H]<sup>-</sup>: 1140.47071, found: 1140.47231.

### 3b

**R<sub>f</sub>** (pentane/acetone 4:1) = 0.68; **Specific Rotation**  $[\alpha]_D^{24^\circ C} = -18.54$  ( $\beta = 0.37$  g/100 mL, CHCl<sub>3</sub>); **FT-IR**  $\tilde{\nu}$  (film) 3431, 2976, 2935, 2877, 1734, 1645, 1369, 1251, 1069, 1027, 904 cm<sup>-1</sup>; **<sup>1</sup>H NMR** (500 MHz, acetone-*d*<sub>6</sub>)  $\delta$  7.26 (d, *J* = 11.5 Hz, 1H), 6.66–6.58 (m, 1H), 5.96 (ddd, *J* = 14.6, 9.8, 4.5 Hz, 1H), 5.82 (s, 1H), 5.62 (t, *J* = 8.3 Hz, 1H), 5.22 (d, *J* = 10.6 Hz, 1H), 5.03–4.98 (m, 2H), 4.79–4.71 (m, 6H), 4.56 (s, 1H), 4.55 (d, *J* = 11.5 Hz, 1H), 4.43 (d, *J* = 11.6 Hz, 1H), 4.31–4.28 (br m, 1H), 4.17 (d, *J* = 9.4 Hz, 1H), 4.06–3.99 (m, 2H), 3.95 (d, *J* = 3.3 Hz, 1H), 3.89 (d, *J* = 4.2 Hz, 1H), 3.86–3.80 (m, 1H), 3.76–3.70 (m, 2H), 3.68–3.63 (m, 1H), 3.52 (s, 3H), 3.52–3.47 (m, 2H), 3.26 (d, *J* = 9.0 Hz, 1H), 3.16 (s, 3H), 3.06 (s, 3H), 2.94 (s, 3H), 2.93 (s, 3H), 2.88–2.74 (m, 2H), 2.74–2.68 (m, 2H), 2.68–2.61 (m, 1H), 2.61–2.48 (m, 2H), 2.43 (ddd, *J* = 14.3, 9.5, 4.6 Hz, 1H), 1.98–1.89 (m, 1H), 1.81 (d, *J* = 1.3 Hz, 3H), 1.70 (s, 3H), 1.66 (s, 3H), 1.30 (d, *J* = 6.1 Hz, 3H), 1.28–1.21 (m, 1H), 1.19–1.12 (m, 15H), 1.09 (s, 3H), 0.82 (t, *J* = 7.5 Hz, 3H) ppm; **<sup>13</sup>C NMR** (126 MHz, acetone-*d*<sub>6</sub>)  $\delta$  176.8, 167.7, 167.1, 166.7, 166.2, 153.8, 151.7, 145.8, 143.8, 140.3, 136.8, 136.11, 136.08, 133.7, 128.5, 128.0, 126.13, 126.07, 124.9, 124.0, 122.0, 101.0, 96.8, 93.3, 82.0, 78.1, 77.9, 75.7, 73.8, 72.9, 72.8, 72.7, 72.4, 72.3, 70.8, 70.2, 67.7, 62.8, 61.7, 42.0, 37.5, 36.7, 36.3, 35.4, 35.3, 34.8, 28.7, 28.4, 26.6, 25.7, 20.8, 19.4, 19.2, 18.6, 18.5, 17.5, 15.2, 14.4, 13.8, 11.2 ppm; **HRMS** ESI<sup>+</sup> (MeOH), calculated for C<sub>60</sub>H<sub>88</sub>Cl<sub>2</sub>N<sub>2</sub>O<sub>20</sub>Na [M+Na]<sup>+</sup>: 1249.51997, found: 1249.51806.



## Fidaxomicin Ethylacetat (**4a**) and Fidaxomicin Bis(ethylacetate) (**4b**)

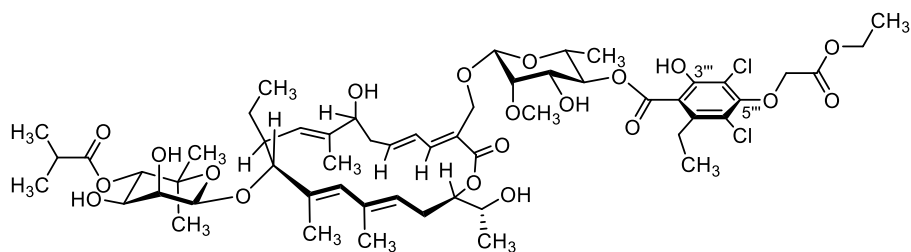

**4a**

Chemical Formula: C<sub>56</sub>H<sub>80</sub>Cl<sub>2</sub>O<sub>20</sub>

Exact Mass: 1142.4620

Molecular Weight: 1144.1360

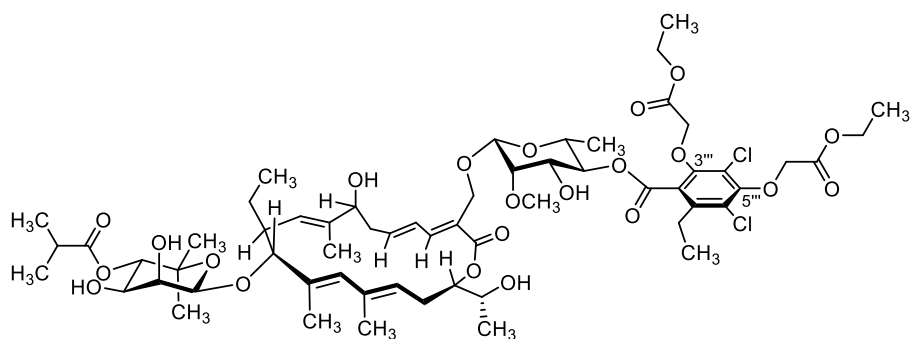

**4b**

Chemical Formula: C<sub>60</sub>H<sub>86</sub>Cl<sub>2</sub>O<sub>22</sub>

Exact Mass: 1228.4988

Molecular Weight: 1230.2260

A flame-dried flask was charged with fidaxomicin (20.0 mg, 18.9  $\mu\text{mol}$ , 1.0 equiv.) and K<sub>2</sub>CO<sub>3</sub> (10.4 mg, 75.6  $\mu\text{mol}$ , 4.0 equiv.). The solids were dissolved in dry DMF (0.8 mL) and ethyliodoacetate (3  $\mu\text{L}$ , 25  $\mu\text{mol}$ , 1.3 equiv.) was added. The slightly yellow reaction mixture was stirred at 45 °C under argon atmosphere for 6.5 hours. The reaction mixture was diluted with EtOAc (1.0 mL) and a saturated aqueous solution of NH<sub>4</sub>Cl (1.0 mL) was added. The layers were separated and the aqueous phase was extracted with EtOAc (3x). The combined organic phases were washed with a saturated aqueous solution of NaCl (2x) and dried over anhydrous MgSO<sub>4</sub>. After filtration of the drying agent, the solvent was evaporated under reduced pressure to afford fidaxomicin derivatives **4a** and **4b** as a mixture. The compounds were separated by flash column chromatography (SiO<sub>2</sub>, pentane/acetone 3:2) to afford **4a** (6.2 mg, 5.4  $\mu\text{mol}$ , 29 %) and **4b** (7.8 mg, 6.3  $\mu\text{mol}$ , 34 %) as colourless solids.

#### 4a

$R_f$  (pentane/acetone 3:2) = 0.37; **Specific Rotation**  $[\alpha]_D^{26^\circ C} = -31.90$  ( $\beta = 0.41$  g/100 mL,  $\text{CHCl}_3$ ); **FT-IR**  $\tilde{\nu}$  (film) 3474, 2978, 2935, 1737, 1642, 1581, 1384, 1243, 1202, 1146, 1117, 1069, 1028, 902, 770  $\text{cm}^{-1}$ ;  **$^1\text{H NMR}$**  (500 MHz, acetone- $d_6$ )  $\delta$  7.23 (d,  $J = 11.5$  Hz, 1H), 6.69–6.54 (m, 1H), 5.96 (ddd,  $J = 14.6, 9.5, 4.6$  Hz, 1H), 5.83 (s, 1H), 5.63 (t,  $J = 8.3$  Hz, 1H), 5.21 (d,  $J = 10.5$  Hz, 1H), 5.06 (t,  $J = 9.7$  Hz, 1H), 4.99 (d,  $J = 10.1$  Hz, 1H), 4.77 (s, 1H), 4.73 (q,  $J = 5.1$  Hz, 1H), 4.70 (s, 2H), 4.67 (s, 1H), 4.60 (d,  $J = 11.5$  Hz, 1H), 4.41 (d,  $J = 1.5$  Hz, 1H), 4.27 (m, br, 1H), 4.25 (q,  $J = 7.1$  Hz, 2H), 4.10–3.99 (m, 2H), 3.97–3.94 (m, 1H), 3.83 (d,  $J = 3.6$  Hz, 1H), 3.79–3.70 (m, 3H), 3.62–3.55 (m, 2H), 3.52 (s, 3H), 3.32–3.25 (m, 1H), 2.93–2.78 (m, 2H), 2.78–2.60 (m, 3H), 2.56 (sept,  $J = 7.0$  Hz, 1H), 2.53–2.40 (m, 2H), 1.98–1.89 (m, 1H), 1.81 (d,  $J = 1.4$  Hz, 3H), 1.73 (d,  $J = 1.3$  Hz, 3H), 1.66 (s, 3H), 1.33 (d,  $J = 6.1$  Hz, 3H), 1.28 (t,  $J = 7.2$  Hz, 3H), 1.30–1.22 (m, 1H), 1.21–1.11 (m, 15H), 1.09 (s, 3H), 0.82 (t,  $J = 7.4$  Hz, 3H) ppm;  **$^{13}\text{C NMR}$**  (126 MHz, acetone- $d_6$ )  $\delta$  176.8, 168.0, 167.8, 167.6, 153.8, 152.9, 145.4, 143.4, 141.4, 136.9, 136.11, 136.09, 133.8, 128.2, 126.3, 125.3, 124.0, 120.8, 118.8, 115.7, 101.8, 96.8, 93.3, 81.6, 78.2, 77.5, 75.7, 73.8, 72.9, 72.8, 72.4, 70.6, 70.2, 70.0, 67.7, 63.4, 61.7, 61.6, 42.0, 37.3, 34.8, 28.7, 28.4, 26.5, 25.9, 20.7, 19.4, 19.2, 18.6, 18.1, 17.5, 15.2, 14.5, 13.8, 11.2 ppm; **HRMS** ESI+ (MeOH), calculated for  $\text{C}_{56}\text{H}_{80}\text{Cl}_2\text{O}_{20}\text{Na}$   $[\text{M}+\text{Na}]^+$ : 1165.45122, found: 1165.44810.

#### 4b

$R_f$  (pentane/acetone 3:2) = 0.29; **Specific Rotation**  $[\alpha]_D^{24^\circ C} = -33.68$  ( $\beta = 0.34$  g/100 mL,  $\text{CHCl}_3$ ); **FT-IR**  $\tilde{\nu}$  (film) 3493, 2977, 2936, 2877, 1737, 1641, 1384, 1251, 1204, 1121, 1070, 1030, 901, 795  $\text{cm}^{-1}$ ;  **$^1\text{H NMR}$**  (500 MHz, acetone- $d_6$ )  $\delta$  7.23 (d,  $J = 11.4$  Hz, 1H), 6.62 (m, 1H), 5.96 (ddd,  $J = 14.6, 9.5, 4.6$  Hz, 1H), 5.83 (s, 1H), 5.62 (t,  $J = 8.3$  Hz, 1H), 5.21 (dt,  $J = 10.5, 1.7$  Hz, 1H), 5.04–4.97 (m, 2H), 4.77 (s, 1H), 4.75–4.69 (m, 3H), 4.68 (s, 1H), 4.64–4.60 (m, 2H), 4.59 (d,  $J = 11.5$  Hz, 1H), 4.40 (d,  $J = 11.5$  Hz, 1H), 4.29–4.20 (m, 5H), 4.05–3.99 (m, 2H), 3.97–3.93 (m, 1H), 3.87 (d,  $J = 10.0$  Hz, 1H), 3.80 (d,  $J = 3.7$  Hz, 1H), 3.75–3.66 (m, 4H), 3.56–3.52 (m, 2H), 3.52 (s, 3H), 3.24 (d,  $J = 9.4$  Hz, 1H), 2.93–2.75 (m, 2H), 2.74–2.61 (m, 3H), 2.56 (sept,  $J = 7.0$  Hz, 1H), 2.54–2.46 (m, 1H), 2.44 (ddd,  $J = 13.9, 9.5, 4.7$  Hz, 1H), 1.97–1.89 (m, 1H), 1.81 (d,  $J = 1.4$  Hz, 3H), 1.73 (s, 3H), 1.66 (s, 3H), 1.33 (d,  $J = 6.2$  Hz, 3H), 1.30–1.26 (m, 7H), 1.19–1.12 (m, 15H), 1.09 (s, 3H), 0.82 (t,  $J = 7.4$  Hz, 3H) ppm;  **$^{13}\text{C NMR}$**  (126 MHz, acetone- $d_6$ ) 176.8, 167.98, 167.96, 167.8, 166.1, 153.4, 151.1, 145.4, 143.4, 140.4, 136.9, 136.1, 133.8, 128.6, 128.2, 126.4, 126.2, 125.4, 124.0, 121.8, 101.7, 96.7, 93.3, 81.9, 79.2, 78.2, 77.8, 75.7, 73.8, 72.9, 72.8, 72.4, 71.5, 70.7, 70.2, 70.1, 67.7, 63.3, 61.73, 61.66, 61.6, 42.0, 37.3, 34.8, 28.7, 28.4, 26.5, 25.6, 20.7, 19.4, 19.2, 18.6, 18.2, 17.5, 15.2, 14.52, 14.47, 14.3, 13.8, 11.1 ppm; **HRMS** ESI+ (MeOH), calculated for  $\text{C}_{60}\text{H}_{90}\text{Cl}_2\text{O}_{22}\text{N}$   $[\text{M}+\text{NH}_4]^+$ : 1246.53261, found: 1246.53412.

## Allyl 4-(2-chloroacetyl)piperazine-1-carboxylate<sup>2</sup>

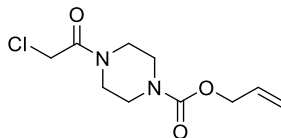

Chemical Formula: C<sub>10</sub>H<sub>15</sub>ClN<sub>2</sub>O<sub>3</sub>

Exact Mass: 246.0771

Molecular Weight: 246.6910

In a flame-dried flask, a solution of chloroacetyl chloride (59  $\mu$ L, 0.73 mmol, 1.0 equiv.) in dry THF (590  $\mu$ L) was added to a stirred solution of alloc-protected piperazin<sup>3,4</sup> (125 mg, 0.734 mmol, 1.0 equiv.) and freshly distilled diisopropylethyl amine (146  $\mu$ L, 0.881 mmol, 1.2 equiv.) in THF (2.3 mL) at 0 °C. Upon addition of chloroacetyl chloride, the clear solution turned pink and a colourless solid precipitated. The mixture was stirred at 0 °C for 1 hour and was then allowed to warm to rt and stirred for another 2.5 hours. The solvent was evaporated under reduced pressure and the residue was dissolved in chloroform. The organic phase was washed with H<sub>2</sub>O (3x), the combined aqueous layers were extracted with chloroform and the combined organic phases dried over anhydrous MgSO<sub>4</sub>. After filtration of the drying agent, the solvent was removed *in vacuo* and the crude product was purified by flash column chromatography (SiO<sub>2</sub>, pentane/EtOAc 1:1) to afford the desired product (130 mg, 0.527 mmol, 72 %) as a colourless oil.

**R<sub>f</sub>** (pentane/EtOAc 1:1) = 0.20; **FT-IR**  $\tilde{\nu}$  (film) 2866, 1701, 1654, 1466, 1432, 1417, 1287, 1250, 1230, 1149, 1127, 1080, 970, 766 cm<sup>-1</sup>; **<sup>1</sup>H NMR** (400 MHz, CDCl<sub>3</sub>)  $\delta$  5.94 (ddt, *J* = 17.2, 10.4, 5.6 Hz, 1H), 5.34–5.27 (m, 1H), 5.26–5.21 (m, 1H), 4.62 (dt, *J* = 5.6, 1.4 Hz, 2H), 4.08 (s, 2H), 3.65–3.47 (m, 8H) ppm; **<sup>13</sup>C NMR** (101 MHz, CDCl<sub>3</sub>)  $\delta$  165.5, 155.1, 132.8, 118.1, 66.6, 46.2, 43.9, 43.6, 42.1, 40.9 ppm; **HRMS** ESI+ (MeOH), calculated for C<sub>10</sub>H<sub>16</sub>ClN<sub>2</sub>O<sub>3</sub> [M+H]<sup>+</sup>: 247.08440, found: 247.08442.

### Allyl 4-(2-iodoacetyl)piperazine-1-carboxylate

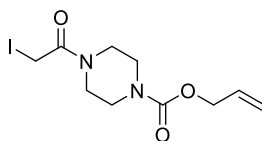

Chemical Formula: C<sub>10</sub>H<sub>15</sub>I N<sub>2</sub>O<sub>3</sub>

Exact Mass: 338.0127

Molecular Weight: 338.1455

In a flame-dried flask equipped with a reflux condenser, allyl 4-(2-chloroacetyl)piperazine-1-carboxylate (80.0 mg, 0.324 mmol, 1.0 equiv.) was dissolved in dry MeCN (1.0 mL) and NaI (219 mg, 1.46 mmol, 4.5 equiv.) was added. The mixture immediately turned cloudy yellow and was stirred at 60 °C for 3 hours under argon atmosphere. H<sub>2</sub>O (3.0 mL) was added to the reaction mixture, and MeCN was removed under reduced pressure. EtOAc (3.0 mL) was added and the phases were separated. The aqueous phase was extracted with EtOAc (3x). The combined yellow organic layers were dried over anhydrous MgSO<sub>4</sub>. After filtration of the drying agent, the solvent was evaporated under reduced pressure. The crude product was purified by flash column chromatography (SiO<sub>2</sub>, pentane/EtOAc 1:1) to afford the desired product (83.0 mg, 0.246 mmol, 76 %) as a yellow oil.

**R<sub>f</sub>** (pentane/EtOAc 1:1) = 0.19; **FT-IR**  $\tilde{\nu}$  (film) 2863, 1694, 1635, 1457, 1430, 1412, 1356, 1285, 1226, 1175, 1131, 1104, 1069, 967, 929, 795, 605, 541 cm<sup>-1</sup>; **<sup>1</sup>H NMR** (400 MHz, CDCl<sub>3</sub>)  $\delta$  5.88 (ddt, *J* = 17.2, 10.4, 5.6 Hz, 1H), 5.24 (dq, *J* = 17.2, 1.5 Hz, 1H), 5.17 (dq, *J* = 10.4, 1.3 Hz, 1H), 4.55 (dt, *J* = 5.7, 1.4 Hz, 2H), 3.69 (s, 2H), 3.58–3.52 (m, 4H), 3.46–3.36 (m, 4H) ppm; **<sup>13</sup>C NMR** (101 MHz, CDCl<sub>3</sub>)  $\delta$  166.7, 154.9, 132.7, 117.9, 66.4, 46.9, 43.2, 43.1, 41.8, -4.22 ppm; **HRMS** ESI+ (MeOH), calculated for C<sub>10</sub>H<sub>16</sub>IN<sub>2</sub>O<sub>3</sub> [M+H]<sup>+</sup>: 339.02001, found: 339.01996.

## Fidaxomicin Piperazine and Fidaxomicin Di(piperazine) with alloc Protecting Group

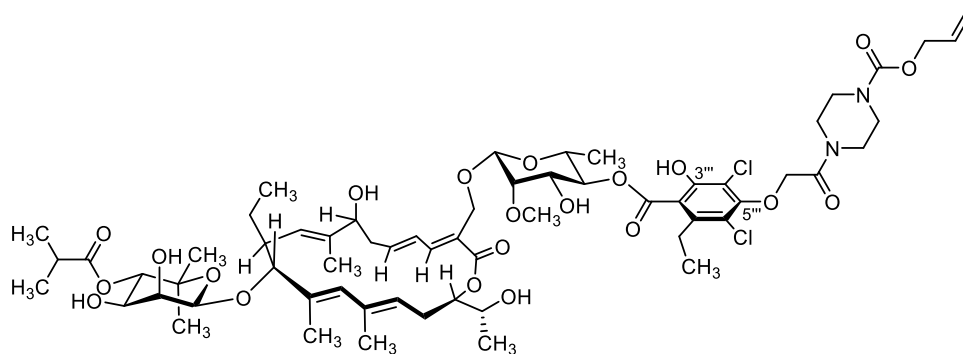

**A**

Chemical Formula:  $C_{62}H_{88}Cl_2N_2O_{21}$

Exact Mass: 1266.52566

Molecular Weight: 1268.27900

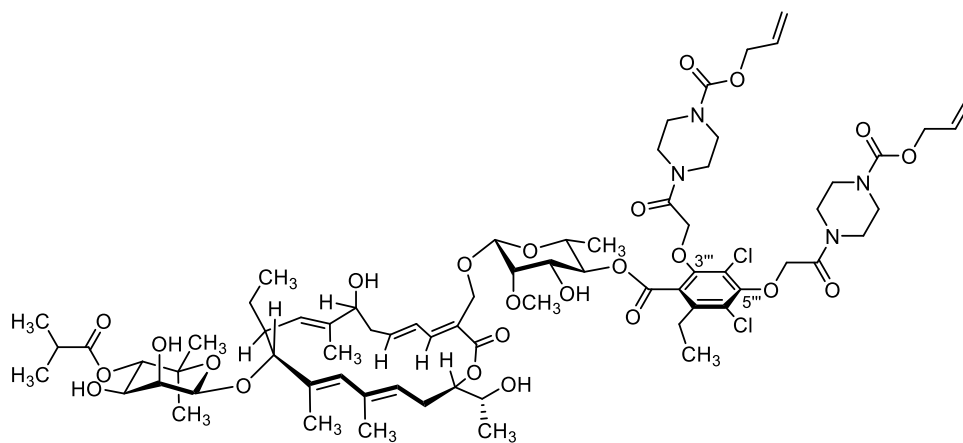

**B**

Chemical Formula:  $C_{72}H_{102}Cl_2N_4O_{24}$

Exact Mass: 1476.6261

Molecular Weight: 1478.5120

A flame-dried flask was charged with fidaxomicin (100 mg, 94.5  $\mu$ mol, 1.0 equiv.) and  $K_2CO_3$  (52.2 mg, 0.378 mmol, 4.0 equiv.). The solids were dissolved in dry DMF (4.0 mL) and allyl 4-(2-iodoacetyl)piperazine-1-carboxylate (47.9 mg, 0.142 mmol, 1.5 equiv.) was added. The brown reaction mixture was stirred at 45 °C under argon atmosphere for 7.5 hours. The reaction mixture was diluted with EtOAc and a saturated aqueous solution of  $NH_4Cl$  was added. The layers were separated and the aqueous phase was extracted with EtOAc (3x). The combined organic phases were dried over anhydrous  $MgSO_4$ . After filtration of the drying agent, the solvent was evaporated under reduced pressure to afford mono- and disubstituted products **A** and **B** as a mixture. The two compounds

were separated by RP-HPLC [Gemini NX C18, 10  $\mu$ , 110 Å, 250 mm x 21.2 mm, solvent A: H<sub>2</sub>O+0.1 % HCOOH, solvent B: MeCN+0.1 % HCOOH; 20 mL/min; LC time program (min – % B): 0.0 – 45 %, 3.0 – 45 %, 46.0 – 55 %, 55.0 – 100 %] to afford, after lyophilization, **A** ( $t_R$  = 35.6 min, 32.3 mg, 25.5  $\mu$ mol, 27 %) and **B** ( $t_R$  = 38.0 min, 42.8 mg, 28.9  $\mu$ mol, 31 %) as colourless solids.

### **A**

$R_f$  (CH<sub>2</sub>Cl<sub>2</sub>/MeOH 9:1) = 0.42; **Specific Rotation**  $[\alpha]_D^{24^\circ C} = -49.52$  ( $\beta = 0.35$  g/100 mL, CHCl<sub>3</sub>); **FT-IR**  $\tilde{\nu}$  (film) 3452, 2978, 2936, 2877, 1736, 1697, 1647, 1580, 1416, 1370, 1234, 1069, 1006, 901, 768 cm<sup>-1</sup>; **<sup>1</sup>H NMR** (500 MHz, acetone-*d*<sub>6</sub>)  $\delta$  7.23 (d,  $J = 11.3$  Hz, 1 H), 6.67–6.58 (m, 1H), 6.02–5.92 (m, 2H), 5.83 (s, 1H), 5.62 (t,  $J = 8.4$  Hz, 1H), 5.31 (dq,  $J = 17.3, 1.7$  Hz, 1H), 5.23–5.16 (m, 2H), 5.06 (t,  $J = 9.8$  Hz, 1H), 4.99 (d,  $J = 10.1$  Hz, 1H), 4.80 (s, 2H), 4.77 (s, 1H), 4.73 (q,  $J = 5.3$  Hz, 1H), 4.67 (s, 1H), 4.62–4.57 (m, 3H), 4.41 (d,  $J = 11.5$  Hz, 1H), 4.27 (m, br, 1H), 4.05–3.99 (m, 1H), 3.97–3.94 (m, 1H), 3.83–3.67 (m, 7H), 3.65–3.54 (m, 6H), 3.52 (s, 3H), 2.97–2.81 (m, 2H), 2.79–2.61 (m, 3H), 2.56 (sept,  $J = 6.9$  Hz, 1H), 2.54–2.39 (m, 2H), 1.99–1.89 (m, 1H), 1.81 (d,  $J = 1.3$  Hz, 3H), 1.73 (s, 3H), 1.66 (s, 3H), 1.33 (d,  $J = 6.2$  Hz, 3H), 1.31–1.22 (m, 1H), 1.21–1.11 (m, 15H), 1.09 (s, 3H), 0.83 (t,  $J = 7.5$  Hz, 3H) ppm; **<sup>13</sup>C NMR** (126 MHz, acetone-*d*<sub>6</sub>)  $\delta$  176.8, 167.8, 167.6, 165.8, 155.4, 154.3, 152.9, 145.4, 143.4, 141.4, 136.9, 136.1, 134.4, 133.8, 128.1, 126.4, 125.3, 124.0, 120.8, 118.8, 117.3, 115.8, 101.8, 96.7, 93.3, 81.5, 78.2, 77.5, 75.7, 73.8, 72.9, 72.8, 72.40, 72.38, 70.6, 70.2, 67.7, 66.4, 63.4, 61.7, 45.8, 44.7, 44.3, 42.2, 42.0, 37.3, 34.8, 28.7, 28.4, 26.5, 25.9, 20.7, 19.4, 19.2, 18.6, 18.1, 17.5, 15.2, 14.5, 13.8, 11.2 ppm; **HRMS** ESI+ (MeOH), calculated for C<sub>62</sub>H<sub>88</sub>Cl<sub>2</sub>N<sub>2</sub>O<sub>21</sub>Na [M+Na]<sup>+</sup>: 1289.51488, found: 1289.51544.

### **B**

$R_f$  (CH<sub>2</sub>Cl<sub>2</sub>/MeOH 4:1) = 0.76; **Specific Rotation**  $[\alpha]_D^{24^\circ C} = -40.24$  ( $\beta = 0.96$  g/100 mL, CHCl<sub>3</sub>); **FT-IR**  $\tilde{\nu}$  (film) 3452, 2976, 2935, 2876, 1733, 1699, 1646, 1468, 1432, 1368, 1287, 1246, 1229, 1128, 1067, 1025, 902, 766 cm<sup>-1</sup>; **<sup>1</sup>H NMR** (500 MHz, acetone-*d*<sub>6</sub>)  $\delta$  7.24 (d,  $J = 11.4$  Hz, 1H), 6.66–6.57 (m, 1H), 6.03–5.90 (m, 3H), 5.82 (s, 1H), 5.62 (t,  $J = 8.7$  Hz, 1H), 5.65–5.58 (m, 2H), 5.23–5.16 (m, 3H), 5.04–4.97 (m, 2H), 4.86–4.78 (m, 4H), 4.76 (s, 1H), 4.73 (q,  $J = 4.9$  Hz, 1H), 4.60–4.54 (m, 6H), 4.41 (d,  $J = 11.5$  Hz, 1H), 4.28 (m, br, 1H), 4.11 (d,  $J = 9.7$  Hz, 1H), 4.08–3.99 (m, 1H), 3.97–3.94 (m, 1H), 3.90–3.81 (m, br, 1H), 3.76–3.64 (m, 3H), 3.64–3.47 (18 H), 3.52 (s, 3H), 2.91–2.76 (m, 2H), 2.75–2.61 (m, 3H), 2.56 (sept,  $J = 7.0$  Hz, 1H), 2.53–2.47 (m, 1H), 2.43 (ddd,  $J = 14.0, 9.3, 4.5$  Hz, 1H), 1.98–1.89 (m, 1H), 1.80 (d,  $J = 1.3$  Hz, 3H), 1.70 (s, 3H), 1.65 (s, 3H), 1.31 (d,  $J = 6.1$  Hz, 3H), 1.28–1.20 (m, 1H), 1.19–1.12 (m, 15H), 1.09 (s, 3H), 0.83 (t,  $J = 7.3$  Hz, 3H) ppm; **<sup>13</sup>C NMR** (126 MHz, acetone-*d*<sub>6</sub>)  $\delta$  176.8, 167.7, 166.1, 166.0, 165.7, 155.4, 153.7, 151.6, 145.6, 143.6, 140.4, 136.8, 136.1, 136.0, 134.32, 134.30, 133.7, 128.5, 128.0, 126.2, 126.1, 125.0, 123.9, 122.0, 117.37, 117.34, 101.3, 96.7, 93.2, 81.9, 78.1, 77.9, 75.7, 73.7, 73.1, 72.82, 72.77, 72.5, 72.3, 70.7, 70.2, 67.6, 66.45, 66.43, 63.0, 61.7, 45.8, 45.4, 44.7, 44.3, 42.1, 42.0, 37.4, 34.7, 28.7, 28.3, 26.5, 25.7, 20.7, 19.4, 19.2, 18.6, 18.5, 17.5, 15.2, 14.4, 13.8, 11.2 ppm; **HRMS** ESI+ (MeOH), calculated for C<sub>72</sub>H<sub>102</sub>Cl<sub>2</sub>N<sub>4</sub>O<sub>24</sub>Na [M+Na]<sup>+</sup>: 1499.61533, found: 1499.61505.

## Fidaxomicin Piperazine (5a)

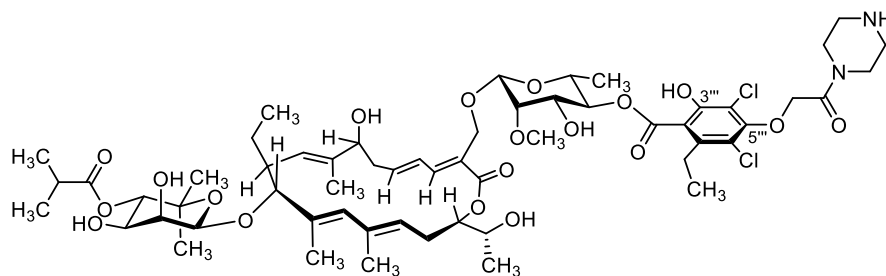

Chemical Formula: C<sub>58</sub>H<sub>84</sub>Cl<sub>2</sub>N<sub>2</sub>O<sub>19</sub>

Exact Mass: 1182.5045

Molecular Weight: 1184.2050

In a flame-dried flask under argon atmosphere, mono-substituted alloc-piperazine-fidaxomicin (20.0 mg, 15.8 μmol, 1.0 equiv.) was dissolved in dry CH<sub>2</sub>Cl<sub>2</sub> (1.5 mL) and 1,3-dimethylbarbituric acid (5.9 mg, 38 μmol, 2.4 equiv.) was added. The reaction mixture was cooled to 0 °C and tetrakis(triphenylphosphine)palladium(0) (0.9 mg, 0.8 μmol, 5 mol%) was added. The mixture was stirred at 0 °C for 30 min. After completion of the reaction, the mixture was diluted with CH<sub>2</sub>Cl<sub>2</sub> and H<sub>2</sub>O was added. The phases were separated and the aqueous phase was extracted with CH<sub>2</sub>Cl<sub>2</sub> (3x). The combined organic layers were dried over anhydrous MgSO<sub>4</sub>. After filtration of the drying agent, the solvent was removed under reduced pressure and the crude product was purified by flash column chromatography (SiO<sub>2</sub>, CH<sub>2</sub>Cl<sub>2</sub>/MeOH 9:1 to 4:1) to afford the desired amine **5a** (9.50 mg, 8.0 μmol, 51 %) as a colourless solid.

**R<sub>f</sub>** (CH<sub>2</sub>Cl<sub>2</sub>/MeOH 4:1) = 0.28; **Specific Rotation**  $[\alpha]_D^{24} = -2.79$  ( $\beta = 0.35$  g/100 mL, MeOH); **FT-IR**  $\tilde{\nu}$  (film) 3414, 2975, 2928, 2875, 1692, 1640, 1557, 1410, 1371, 1245, 1202, 1112, 1068, 1027, 901 cm<sup>-1</sup>; **<sup>1</sup>H NMR** (500 MHz, CD<sub>3</sub>OD)  $\delta$  7.22 (d,  $J = 11.4$  Hz, 1H), 6.63–6.56 (m, 1H), 5.95 (ddd,  $J = 14.5, 9.4, 4.8$  Hz, 1H), 5.83 (s, 1H), 5.57 (t,  $J = 8.2$  Hz, 1H), 5.16–5.11 (m, 1H), 5.05 (t,  $J = 9.7$  Hz, 1H), 5.01 (d,  $J = 10.2$  Hz, 1H), 4.77–4.68 (m, 4H), 4.63–4.57 (m, 2H), 4.42 (d,  $J = 11.4$  Hz, 1H), 4.25–4.20 (m, 1H), 4.02 (m, 1H), 3.93 (dd,  $J = 3.2, 1.1$  Hz, 1H), 3.80–3.68 (m, 7H), 3.59–3.57 (m, 1H), 3.56 (s, 3H), 3.54–3.50 (m, 1H), 3.13–3.05 (m, 4H), 2.86–2.65 (m, 5H), 2.60 (sept,  $J = 7.0$  Hz, 1H), 2.52–2.38 (m, 2H), 2.04–1.96 (m, 1H), 1.81 (s, 3H), 1.76 (s, 3H), 1.66 (s, 3H), 1.37 (d,  $J = 6.2$  Hz, 3H), 1.32–1.25 (m, 1H), 1.20–1.11 (m, 18H), 0.87 (t,  $J = 7.5$  Hz, 3H) ppm; **<sup>13</sup>C NMR** (126 MHz, CD<sub>3</sub>OD)  $\delta$  178.4, 169.1, 168.9, 168.0, 157.2, 153.5, 146.2, 143.7, 140.6, 137.1, 137.0, 136.3, 134.6, 128.5, 126.9, 125.6, 124.6, 122.2, 121.4, 116.9, 102.2, 97.2, 94.3, 82.3, 78.6, 77.0, 75.9, 74.5, 73.5, 73.2, 72.9, 72.0, 71.5, 70.5, 68.3, 63.8, 62.1, 45.7, 45.3, 42.5, 42.0, 41.9, 37.3, 35.4, 28.7, 28.4, 26.9, 26.0, 20.2, 19.5, 19.1, 18.7, 18.0, 17.5, 15.4, 14.6, 13.9, 11.3 ppm; **HRMS** ESI+ (MeOH), calculated for C<sub>58</sub>H<sub>85</sub>Cl<sub>2</sub>N<sub>2</sub>O<sub>19</sub> [M+H]<sup>+</sup>: 1183.51181, found: 1183.51223.

## Fidaxomicin Dipiperazine (5b)

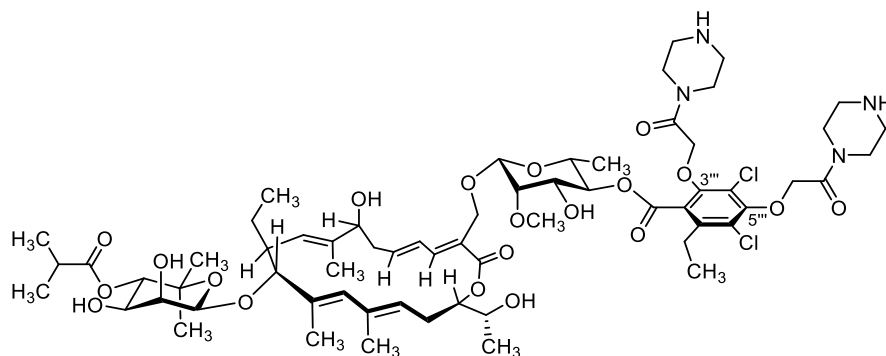

Chemical Formula: C<sub>64</sub>H<sub>94</sub>Cl<sub>2</sub>N<sub>4</sub>O<sub>20</sub>

Exact Mass: 1308.5838

Molecular Weight: 1310.3640

In a flame-dried flask, disubstituted alloc-protected fidaxomicin di(piperazine) (15.4 mg, 10.4  $\mu$ mol, 1.0 equiv.) was dissolved in dry CH<sub>2</sub>Cl<sub>2</sub> (1.0 mL) and 1,3-dimethylbarbituric acid (3.9 mg, 25  $\mu$ mol, 2.4 equiv.) was added. The reaction mixture was cooled to 0 °C and tetrakis(triphenylphosphine)palladium(0) (0.6 mg, 0.5  $\mu$ mol, 5 mol%) was added. The mixture was stirred at 0 °C for 1 hour. CH<sub>2</sub>Cl<sub>2</sub> and H<sub>2</sub>O were added. The phases were separated and the aqueous phase was washed with CH<sub>2</sub>Cl<sub>2</sub> (3x). The desired product **5b** (9.50 mg crude) was obtained by lyophilization of the aqueous phase.

R<sub>f</sub> (CH<sub>2</sub>Cl<sub>2</sub>/MeOH 3:2) = 0.14; **<sup>1</sup>H NMR** (500 MHz, CD<sub>3</sub>OD)  $\delta$  7.21 (d, *J* = 11.5 Hz, 1H), 6.63–6.54 (m, 1H), 5.95 (ddd, *J* = 14.6, 9.2, 4.9 Hz, 1H), 5.83 (s, 1H), 5.57 (t, *J* = 8.2 Hz, 1H), 5.14 (dt, *J* = 10.5, 1.5 Hz, 1H), 5.03 (t, *J* = 9.7 Hz, 1H), 5.01 (d, *J* = 10.2 Hz, 1H), 4.85–4.78 (m, 4H), 4.73–4.69 (m, 2H), 4.62–4.58 (m, 2H), 4.42 (d, *J* = 11.5 Hz, 1H), 4.22 (s, br, 1H), 4.01 (m, 1H), 3.92 (d, *J* = 3.2 Hz, 1H), 3.87–3.75 (m, 6H), 3.74 (d, *J* = 3.3 Hz, 1H), 3.87–3.75 (m, 2H), 3.56 (s, 3H), 3.54 (d, 1H), 3.52–3.46 (m, 2H), 3.24–3.10 (m, 8H), 2.86 (sept, *J* = 6.9 Hz, 2H), 2.76–2.66 (m, 3H), 2.59 (sept, *J* = 7.0 Hz, 1H), 2.52–2.46 (m, 1H), 2.46–2.39 (m, 1H), 2.05–1.96 (m, 1H), 1.81 (d, *J* = 1.3 Hz, 3H), 1.75 (d, *J* = 1.4 Hz, 3H), 1.65 (d, *J* = 1.3 Hz, 3H), 1.32 (d, *J* = 6.2 Hz, 3H), 1.30–1.22 (m, 1H), 1.22–1.15 (m, 12H), 1.14 (s, 3H), 1.12 (s, 3H), 0.87 (t, *J* = 7.4 Hz, 3H) ppm; **<sup>13</sup>C NMR** (126 MHz, CD<sub>3</sub>OD)  $\delta$  178.4, 168.7, 167.81, 167.76, 166.8, 154.0, 151.9, 146.2, 143.8, 141.2, 137.0, 136.9, 136.4, 134.6, 129.0, 128.4, 126.9, 126.8, 125.7, 124.6, 122.4, 102.2, 97.2, 94.3, 82.6, 78.6, 77.8, 75.9, 74.6, 73.5, 73.3, 73.0, 72.7, 72.1, 71.4, 70.5, 68.3, 63.9, 62.3, 44.8, 44.6, 44.1, 42.5, 40.6, 37.3, 35.4, 28.7, 28.4, 26.9, 26.1, 20.3, 19.5, 19.1, 18.7, 18.4, 17.5, 15.4, 14.4, 13.9, 11.3 ppm; **HRMS** ESI(+) (MeOH) calculated for C<sub>64</sub>H<sub>95</sub>Cl<sub>2</sub>N<sub>4</sub>O<sub>20</sub> [M+H]<sup>+</sup>: 1309.59112, found: 1309.59286; C<sub>64</sub>H<sub>96</sub>Cl<sub>2</sub>N<sub>4</sub>O<sub>20</sub> [M+2H]<sup>2+</sup>: 655.29920, found: 655.29992.



### 1-(4-Hydroxypiperidin-1-yl)-2-iodoethan-1-one

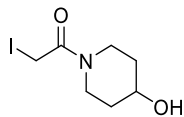

Chemical Formula: C<sub>7</sub>H<sub>12</sub>INO<sub>2</sub>

Exact Mass: 268.9913

Molecular Weight: 269.0825

In a flame-dried flask equipped with a reflux condenser, 2-chloro-1-(4-hydroxycyclohexyl)ethan-1-one<sup>5</sup> (200 mg, 1.13 mmol, 1.0 equiv.) was dissolved in dry MeCN (3.5 mL) and NaI (762 mg, 5.08 mmol, 4.5 equiv.) was added. The mixture immediately turned cloudy yellow and was stirred at 60 °C for 3 hours. After completion of the reaction, MeCN was removed under reduced pressure. The residue was dissolved in CH<sub>2</sub>Cl<sub>2</sub> and H<sub>2</sub>O (10 mL) was added. The aqueous layer was extracted with CH<sub>2</sub>Cl<sub>2</sub> (3x). The combined yellow organic layers were dried over anhydrous MgSO<sub>4</sub>. After filtration of the drying agent, the solvent was evaporated under reduced pressure. The crude brown oil was purified by flash column chromatography (SiO<sub>2</sub>, pentane/EtOAc 5:95) to afford 2-iodo-1-(4-hydroxycyclohexyl)ethan-1-one as a dark brown oil (170 mg, 0.63 mmol, 56 %).

**R<sub>f</sub>** (pentane/EtOAc 1:9) = 0.21; **FT-IR** (film)  $\tilde{\nu}$  = 3393, 2943, 2865, 1616, 1451, 1266, 1068, 1016 cm<sup>-1</sup>; **<sup>1</sup>H NMR** (400 MHz, CDCl<sub>3</sub>)  $\delta$  4.02–3.92 (m, 2H), 3.75 (s, 2H), 3.72–3.64 (m, 1H), 3.35–3.19 (m, 2H), 2.01–1.92 (m, 1H), 1.90–1.81 (m, 1H), 1.71–1.60 (m, 1H), 1.57–1.46 (m, 1H) ppm; **<sup>13</sup>C NMR** (101 MHz, CDCl<sub>3</sub>)  $\delta$  166.6, 66.7, 44.6, 39.5, 33.9, 33.6, –3.9 ppm; **HRMS** ESI(+) (MeOH) calculated for C<sub>7</sub>H<sub>13</sub>INO<sub>2</sub> [M+H]<sup>+</sup>: 269.99855, found: 269.99826.

## Fidaxomicin Piperidin-4-ol (6a) and Fidaxomicin Di(piperidin-4-ol) (6b)

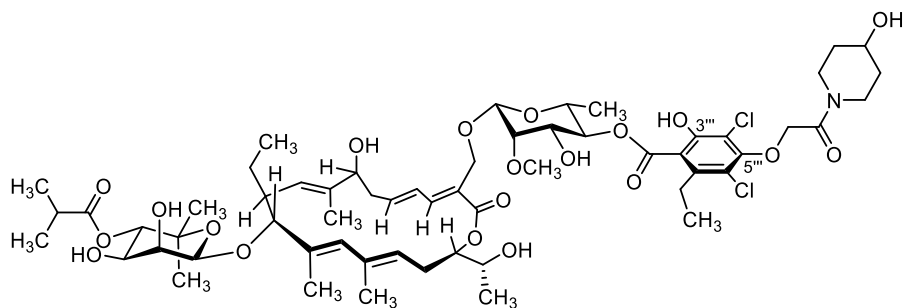

**6a**

Chemical Formula:  $C_{59}H_{85}Cl_2NO_{20}$

Exact Mass: 1197.5042

Molecular Weight: 1199.2160

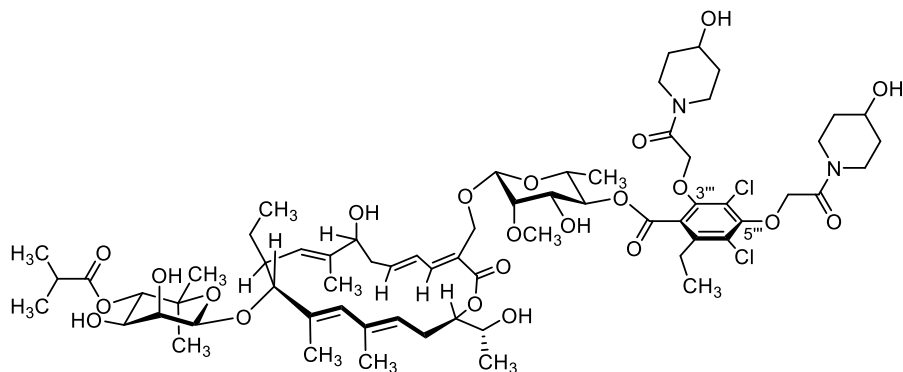

**6b**

Chemical Formula:  $C_{66}H_{96}Cl_2N_2O_{22}$

Exact Mass: 1338.5832

Molecular Weight: 1340.3860

A flame-dried flask under an atmosphere of argon was charged with fidaxomicin (**1**, 30.0 mg, 28.4  $\mu$ mol, 1.0 equiv.),  $K_2CO_3$  (15.7 mg, 0.114 mmol, 4.0 equiv.) and 2-iodo-1-(4-hydroxycyclohexyl)ethan-1-one (11.5 mg, 42.6  $\mu$ mol, 1.5 equiv.). The solids were dissolved in dry DMF (1.2 mL) and the brown reaction mixture was stirred at 45 °C for 9 hours. The reaction mixture was diluted with EtOAc and a saturated aqueous solution of  $NH_4Cl$  was added. The layers were separated and the aqueous phase was extracted with EtOAc (3x). The combined organic phases were dried over anhydrous  $MgSO_4$ . After filtration of the drying agent, the solvent was evaporated under reduced pressure. The crude mixture of mono- and disubstituted products was purified by RP-HPLC [Gemini NX C18, 10  $\mu$ , 110 Å, 250 mm x 21.2 mm, solvent A:  $H_2O+0.1\%$  HCOOH, solvent B: MeCN+0.1 % HCOOH; 20 mL/min; LC time

program (min – % B): 2.0 min – 40 %, 45.0 min – 45 %, 46.0 min – 100 %] to afford, after lyophilization, **6a** ( $t_R$  = 30.2 min, 10.3 mg, 8.59  $\mu\text{mol}$ , 30 %) and **6b** ( $t_R$  = 16.0 min, 8.8 mg, 6.6  $\mu\text{mol}$ , 23 %) as colourless solids.

### **6a**

$R_f$  (CH<sub>2</sub>Cl<sub>2</sub>/MeOH 9:1) = 0.33; **Specific Rotation**  $[\alpha]_D^{24^\circ\text{C}} = -31.81$  ( $\beta = 0.59$  g/100 mL, CHCl<sub>3</sub>); **FT-IR** (film)  $\tilde{\nu} = 3425, 2976, 2935, 2735, 1967, 1640, 1580, 1454, 1416, 1369, 1246, 1069, 1026, 902, 767$  cm<sup>-1</sup>; **<sup>1</sup>H NMR** (500 MHz, acetone-*d*<sub>6</sub>)  $\delta$  7.23 (d,  $J = 11.5$  Hz, 1H), 6.66–6.59 (m, 1H), 5.96 (ddd,  $J = 14.6, 9.5, 4.7$  Hz, 1H), 5.83 (s, 1H), 5.65–5.59 (m, 1H), 5.24–5.19 (m, 1H), 5.06 (t,  $J = 9.7$  Hz, 1H), 4.99 (d,  $J = 10.1$  Hz, 1H), 4.77 (s, 1H), 4.75–4.71 (m, 1H), 4.74 (s, 2H), 4.66 (s, 1H), 4.59 (d,  $J = 11.5$  Hz, 1H), 4.41 (d,  $J = 11.5$  Hz, 1H), 4.28–4.24 (m, 1H), 4.06–3.97 (m, 3H), 3.95 (d,  $J = 3.4$  Hz, 1H), 3.90 (tt,  $J = 8.0, 3.8$  Hz, 1H), 3.78–3.70 (m, 3H), 3.61–3.54 (m, 2H), 3.52 (s, 3H), 3.46–3.38 (m, 1H), 3.24–3.17 (m, 1H), 2.95–2.80 (m, 2H), 2.78–2.61 (m, 3H), 2.60–2.47 (m, 2H), 2.44 (ddd,  $J = 13.9, 9.3, 4.6$  Hz, 1H), 1.93–1.89 (m, 2H), 1.87–1.79 (m, 1H), 1.82 (s, 3H), 1.73 (s, 3H), 1.66 (s, 3H), 1.61–1.53 (m, 1H), 1.50–1.41 (m, 1H), 1.33 (d,  $J = 6.1$  Hz, 3H), 1.29–1.23 (m, 1H), 1.21–1.11 (m, 15H), 1.09 (s, 3H), 0.83 (d,  $J = 7.3$  Hz, 3H) ppm; **<sup>13</sup>C NMR** (126 MHz, acetone-*d*<sub>6</sub>)  $\delta$  176.8, 167.8, 167.7, 165.3, 154.4, 153.2, 145.4, 143.4, 141.3, 136.9, 136.1, 133.8, 128.2, 126.4, 125.3, 124.0, 120.6, 118.8, 115.8, 101.8, 96.8, 93.3, 81.6, 78.2, 77.5, 75.7, 73.8, 72.9, 72.8, 72.5, 72.4, 70.6, 70.2, 67.7, 67.1, 63.4, 61.7, 43.3, 42.0, 39.9, 37.3, 35.6, 34.8, 28.7, 28.4, 26.5, 25.9, 20.7, 19.4, 19.2, 18.6, 18.1, 17.5, 15.2, 14.5, 13.8, 11.2 ppm; **HRMS** ESI(+) (MeOH) calculated for C<sub>59</sub>H<sub>85</sub>Cl<sub>2</sub>NO<sub>20</sub>Na [M+Na]<sup>+</sup>: 1220.49342, found: 1220.49393.

### **6b**

$R_f$  (CH<sub>2</sub>Cl<sub>2</sub>/MeOH 9:1) = 0.23; **Specific Rotation**  $[\alpha]_D^{24^\circ\text{C}} = -38.23$  ( $\beta = 0.47$  g/100 mL, CHCl<sub>3</sub>); **FT-IR** (film)  $\tilde{\nu} = 3420, 2975, 2935, 2876, 1733, 1700, 1639, 1452, 1405, 1369, 1331, 1248, 1068, 1004, 902, 771$  cm<sup>-1</sup>; **<sup>1</sup>H NMR** (500 MHz, acetone-*d*<sub>6</sub>)  $\delta$  7.26 (d,  $J = 11.5$  Hz, 4H), 6.66–6.58 (m, 1H), 5.96 (ddd,  $J = 14.6, 9.7, 4.5$  Hz, 1H), 5.82 (s, 1H), 5.62 (t,  $J = 8.3$  Hz, 1H), 5.24–5.19 (m, 1H), 5.04–4.97 (m, 2H), 4.78–4.76 (m, 5H), 4.73 (q,  $J = 5.0$  Hz, 1H), 4.58–4.53 (m, 2H), 4.43 (d,  $J = 11.6$  Hz, 1H), 4.31–4.27 (m, 1H), 4.18–4.10 (m, 1H), 4.06–3.86 (m, 6H), 3.86–3.78 (m, 2H), 3.75–3.70 (m, 2H), 3.69–3.64 (m, 1H), 3.52 (s, 3H), 3.52–3.47 (m, 2H), 3.44–3.17 (m, 4H), 2.89–2.77 (m, 2H), 2.76–2.61 (m, 3H), 2.61–2.48 (m, 1H), 2.56 (sept,  $J = 7.0$  Hz, 1H), 2.43 (ddd,  $J = 14.1, 9.3, 4.5$  Hz, 1H), 1.97–1.82 (m, 5H), 1.81 (s, 3H), 1.70 (s, 3H), 1.66 (s, 3H), 1.60–1.41 (m, 4H), 1.31 (d,  $J = 6.1$  Hz, 3H), 1.28–1.22 (m, 1H), 1.20–1.11 (m, 15H), 1.09 (s, 3H), 0.82 (t,  $J = 7.4$  Hz, 3H) ppm; **<sup>13</sup>C NMR** (126 MHz, acetone-*d*<sub>6</sub>)  $\delta$  176.8, 167.7, 166.2, 165.5, 165.3, 153.9, 151.7, 145.8, 143.8, 140.4, 136.7, 136.10, 136.07, 133.7, 128.5, 128.0, 126.2, 126.1, 125.0, 124.0, 122.0, 101.1, 96.8, 93.3, 82.0, 78.1, 77.9, 75.7, 73.8, 73.1, 73.0, 72.9, 72.8, 72.6, 72.4, 70.8, 70.2, 67.6, 67.1, 67.0, 62.9, 61.7, 43.3, 42.9, 42.0, 40.0, 39.9, 37.5, 35.61, 35.57, 34.8, 28.7, 28.4, 26.5, 25.7, 20.8, 19.4, 19.2, 18.6, 17.5, 15.2, 14.4, 13.8, 11.2 ppm; **HRMS** ESI(+) (MeOH) calculated for C<sub>66</sub>H<sub>96</sub>Cl<sub>2</sub>N<sub>2</sub>O<sub>22</sub>Na [M+Na]<sup>+</sup>: 1361.57240, found: 1361.57256.

### 2,5,8,11,14,17-Hexaoxonadecan-19-yl 4-nitrobenzenesulfonate

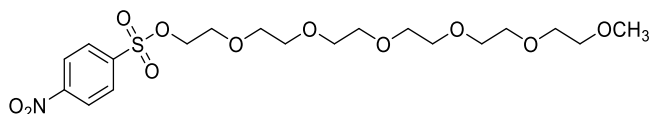

Chemical Formula: C<sub>19</sub>H<sub>31</sub>NO<sub>11</sub>S

Exact Mass: 481.1618

Molecular Weight: 481.5130

In a flame-dried 10 mL Schlenk tube, hexaethyleneglycol monomethyl ether (163 mg, 0.550 mmol, 1.0 equiv.) was dissolved in dry THF (0.3 mL). NEt<sub>3</sub> (150  $\mu$ L, 1.11 mmol, 2.0 equiv.) and *N,N*-dimethylaminopyridine (16.3 mg, 0.133 mmol, 0.13 equiv.) were added and the flask was cooled in an ice bath. A solution of nosyl chloride (222 mg, 1.00 mmol, 1.8 equiv.) in dry THF (1.0 mL) was slowly added by syringe. After the addition, the reaction mixture was stirred at 0 °C for five minutes and then allowed to warm to room temperature. After 18 hours of stirring at room temperature, the reaction mixture was filtered and the solid residue washed with THF (3 x 10 mL). The filtrate was concentrated under reduced pressure. The oily residue was dissolved in CH<sub>2</sub>Cl<sub>2</sub> (15 mL) and washed with a saturated aqueous solution of NaCl (15 mL). The aqueous phase was extracted with CH<sub>2</sub>Cl<sub>2</sub> (3 x 15 mL). The combined organic phases were dried over anhydrous MgSO<sub>4</sub>. After filtration of the drying agent, the solvent was evaporated under reduced pressure. The crude product was further purified by flash column chromatography (SiO<sub>2</sub>, CH<sub>2</sub>Cl<sub>2</sub>/MeOH 96:4) to give the product as a yellow oil (239 mg, 0.496 mmol, 90 %).

R<sub>f</sub> (CH<sub>2</sub>Cl<sub>2</sub>/MeOH 96:4) = 0.28; **FT-IR** (film)  $\tilde{\nu}$  = 2872, 1608, 1532, 1453, 1403, 1350, 1310, 1249, 1185, 1094, 1011, 921, 855, 789, 746, 733, 685, 614, 578, 532, 464 cm<sup>-1</sup>; **<sup>1</sup>H NMR** (400 MHz, CDCl<sub>3</sub>)  $\delta$  8.41–8.31 (m, 2H), 8.15–8.05 (m, 2H), 4.30–4.20 (m, 2H), 3.69–3.65 (m, 2H), 3.62–3.54 (m, 14H), 3.53–3.47 (m, 6H), 3.32 (s, 3H) ppm; **<sup>13</sup>C NMR** (101 MHz, CDCl<sub>3</sub>)  $\delta$  150.7, 141.9, 129.4, 124.4, 71.9, 70.7, 70.62, 70.59, 70.56, 70.54, 70.50, 70.47, 68.5, 59.0 ppm; **HRMS** ESI(+) (MeOH) calculated for C<sub>19</sub>H<sub>32</sub>NO<sub>11</sub>S [M+H]<sup>+</sup>: 482.16906, found: 482.16923.

## HEG-Fidaxomicin (7a) and Bis(HEG)-Fidaxomicin (7b)

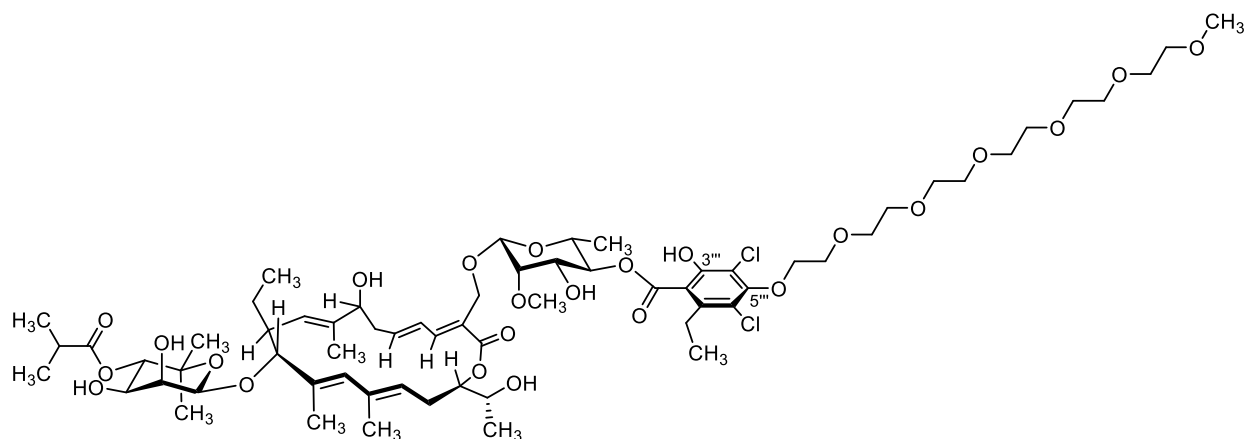

**7a**

Chemical Formula:  $C_{65}H_{100}Cl_2O_{24}$

Exact Mass: 1334.5982

Molecular Weight: 1336.3910

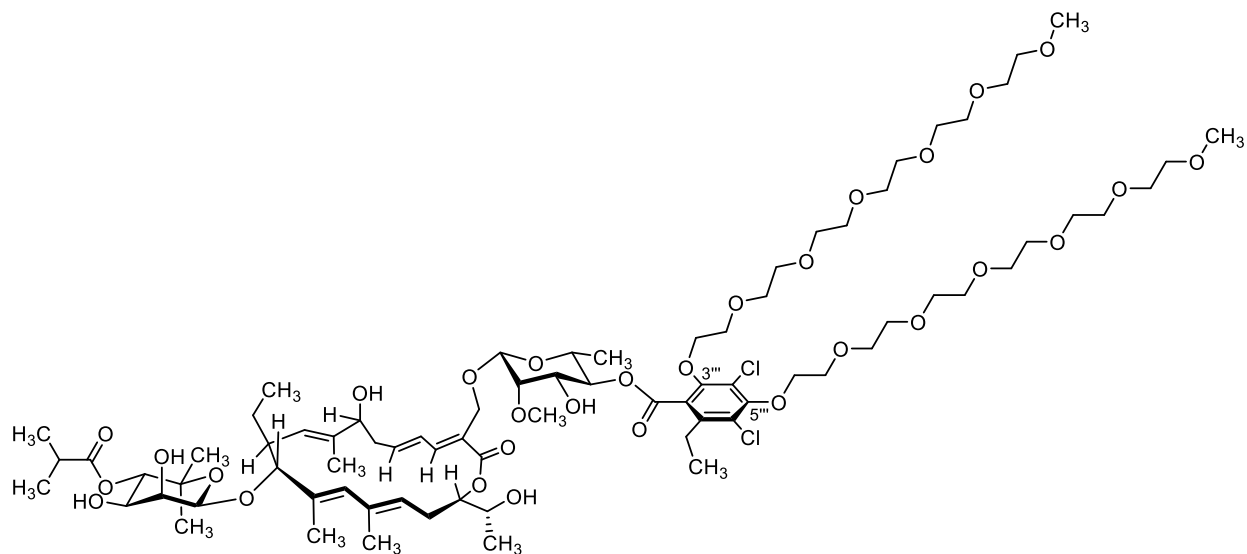

**7b**

Chemical Formula:  $C_{78}H_{126}Cl_2O_{30}$

Exact Mass: 1612.7711

Molecular Weight: 1614.7360

A flame-dried Schlenk tube was charged with fidaxomicin (**1**, 58.0 mg, 54.8  $\mu$ mol, 1.0 equiv.) and the solid was dissolved in dry DMF (0.3 mL). 2,5,8,11,14,17-Hexaoxonadecan-19-yl 4-nitrobenzenesulfonate (186 mg, 0.386 mmol, 7.0 equiv.) was dissolved in dry DMF (0.7 mL) and this solution was added to the reaction flask *via* microliter syringe. Solid  $K_2CO_3$  (31.0 mg, 0.224 mmol, 4.0 equiv.) was added followed by another portion of dry

DMF (0.4 mL). The reaction mixture was stirred at 45 °C. The reaction was monitored by analyzing aliquot samples by UHPLC-MS. After 2.5 hours, the reaction mixture was diluted with EtOAc (10 mL) and washed with a saturated aqueous solution of NH<sub>4</sub>Cl (15 mL). The aqueous phase was extracted with EtOAc (2 x 10 mL) and the combined organic phases were dried over anhydrous MgSO<sub>4</sub>. After filtration of the drying agent, the solvent was evaporated under reduced pressure. The crude product was subjected to preparative RP-HPLC [Synergi Hydro-RP, 10 μ, 80 Å, 250 mm x 21.2 mm, solvent A: H<sub>2</sub>O +0.1 % HCOOH, solvent B: MeCN+0.1 % HCOOH; 25 mL/min; LC time program (min – % B): 4.0 min – 47 %, 52.0 min – 53 %, 58.0 min – 80 %, 58.1 min – 100 %, 63.00 min – 100 %; λ = 270 nm] to give the monosubstitution product **17a** as a colourless solid (t<sub>R</sub> = 32.54–35.33 min, 14.3 mg, 10.7 μmol, 19 %) and the disubstitution product **17b** as a colourless resin (t<sub>R</sub> = 32.54–35.33 min, 41.2 mg, 25.5 μmol, 46 %).

### **7a**

**Specific Rotation**  $[\alpha]_D^{24^\circ C} = -38.6$  ( $\beta = 0.45$  g/100 mL, CHCl<sub>3</sub>); **FT-IR**  $\tilde{\nu}$  (film) 3454, 2972, 2930, 2875, 1736, 1702, 1641, 1581, 1455, 1414, 1384, 1369, 1349, 1296, 1243, 1199, 1092, 1068, 1024, 949, 901, 857, 800, 769, 732, 583, 506 cm<sup>-1</sup>; **<sup>1</sup>H NMR** (600 MHz, acetone-*d*<sub>6</sub>)  $\delta$  7.23 (d, *J* = 11.4 Hz, 1H), 6.66–6.59 (m, 1H), 5.96 (ddd, *J* = 14.6, 9.5, 4.7 Hz, 1H), 5.83 (s, 1H), 5.65–5.60 (m, 1H), 5.21 (dt, *J* = 10.6, 1.6 Hz, 1H), 5.06 (t, *J* = 9.7 Hz, 1H), 4.99 (d, *J* = 10.1 Hz, 1H), 4.77 (d, *J* = 1.3 Hz, 1H), 4.73 (dt, *J* = 6.5, 4.9 Hz, 1H), 4.66 (s, 1H), 4.60 (d, *J* = 11.5 Hz, 1H), 4.41 (d, *J* = 11.5 Hz, 1H), 4.29–4.25 (m, 1H), 4.23 (t, *J* = 4.9 Hz, 2H), 4.07–3.98 (m, 1H), 3.96 (d, *J* = 3.3 Hz, 1H), 3.88 (t, *J* = 4.8 Hz, 2H), 3.79–3.70 (m, 3H), 3.70–3.66 (m, 2H), 3.64–3.61 (m, 2H), 3.61–3.55 (m, 16H), 3.52 (s, 3H), 3.49–3.44 (m, 2H), 3.29 (s, 3H), 2.97–2.84 (m, 2H), 2.78–2.62 (m, 3H), 2.56 (sept, *J* = 7.0 Hz, 1H), 2.52–2.47 (m, 1H), 2.44 (ddd, *J* = 13.9, 9.0, 4.5 Hz, 1H), 1.96–1.91 (m, 1H), 1.81 (s, 3H), 1.73 (s, 3H), 1.66 (s, 3H), 1.33 (d, *J* = 6.2 Hz, 3H), 1.30–1.12 (m, 16H), 1.09 (s, 3H), 0.82 (t, *J* = 7.4 Hz, 3H) ppm; **<sup>13</sup>C NMR** (151 MHz, acetone-*d*<sub>6</sub>)  $\delta$  176.8, 167.9, 167.8, 155.0, 153.4, 145.4, 143.4, 141.2, 136.9, 136.1, 133.8, 128.2, 126.3, 125.3, 124.0, 118.2, 115.9, 110.9, 101.8, 96.8, 93.3, 81.6, 78.2, 77.5, 75.7, 73.8, 73.7, 72.9, 72.8, 72.6, 72.4, 71.35, 71.25, 71.21, 71.19, 71.16, 71.1, 71.0, 70.9, 70.6, 70.2, 67.7, 63.4, 61.7, 58.8, 42.0, 37.3, 34.8, 28.7, 28.4, 26.5, 25.9, 20.7, 19.4, 19.2, 18.6, 18.1, 17.5, 15.2, 14.5, 13.8, 11.2 ppm; **HRMS** ESI+ (MeOH), calculated for C<sub>65</sub>H<sub>100</sub>Cl<sub>2</sub>O<sub>24</sub>Na [M+Na]<sup>+</sup>: 1357.58738, found: 1357.58787.

### **7b**

**Specific Rotation**  $[\alpha]_D^{24^\circ C} = -35.9$  ( $\beta = 0.93$  g/100 mL, CHCl<sub>3</sub>); **FT-IR**  $\tilde{\nu}$  (neat) 3458, 2975, 2934, 2875, 1736, 1703, 1641, 1568, 1454, 1383, 1368, 1351, 1315, 1278, 1249, 1199, 1099, 1070, 1027, 949, 904, 862, 791, 772, 745, 714 cm<sup>-1</sup>; **<sup>1</sup>H NMR** (500 MHz, acetone-*d*<sub>6</sub>)  $\delta$  7.22 (d, *J* = 11.2 Hz, 1H), 6.63 (dddd, *J* = 14.7, 11.5, 2.1, 1.0 Hz, 1H), 5.95 (ddd, *J* = 14.6, 9.5, 4.6 Hz, 1H), 5.83 (s, 1H), 5.66–5.58 (m, 1H), 5.20 (dt, *J* = 10.6, 1.6 Hz, 1H), 5.03 (t, *J* = 9.7 Hz, 1H), 4.99 (d, *J* = 10.1 Hz, 1H), 4.76 (d, *J* = 1.2 Hz, 1H), 4.72 (q, *J* = 5.3 Hz, 1H), 4.63 (d, *J* = 0.8 Hz, 1H), 4.59 (d, *J* = 11.5 Hz, 1H), 4.40 (d, *J* = 11.5 Hz, 1H), 4.29–4.22 (m, 4H), 4.13 (dt, *J* = 10.0, 4.7 Hz, 1H), 4.06–3.99 (m, 2H), 3.95 (s, 1H), 3.89 (t, *J* = 4.9 Hz, 2H), 3.88–3.87 (m, 1H), 3.84 (s, br, 1H), 3.81 (t, *J* = 4.9 Hz, 2H), 3.75–3.71 (m, 3H), 3.71–3.66 (m, 3H), 3.66–3.54 (m, 36H), 3.53 (s, 3H), 3.49–3.44 (m, 4H), 3.28 (s, 6H), 2.93–2.60 (m,

5H), 2.56 (sept,  $J = 7.0$  Hz, 1H), 2.53–2.47 (m, 1H), 2.43 (ddd,  $J = 13.9, 9.1, 4.4$  Hz, 1H), 1.98–1.89 (m, 1H), 1.81 (d,  $J = 1.3$  Hz, 3H), 1.72 (d,  $J = 1.4$  Hz, 3H), 1.65 (dd,  $J = 1.4, 0.7$  Hz, 3H), 1.37 (d,  $J = 6.2$  Hz, 3H), 1.29–1.21 (m, 1H), 1.19–1.12 (m, 15H), 1.09 (s, 3H), 0.82 (t,  $J = 7.5$  Hz, 3H) ppm;  $^{13}\text{C}$  NMR (151 MHz, acetone- $d_6$ )  $\delta$  176.8, 167.9, 166.5, 154.4, 152.4, 145.3, 143.3, 139.9, 136.9, 136.1, 133.8, 128.3, 128.2, 126.4, 125.7, 125.4, 124.0, 122.0, 101.8, 96.8, 93.3, 82.0, 78.2, 77.5, 75.7, 75.0, 73.9, 73.8, 72.9, 72.8, 72.7, 72.5, 71.5, 71.4, 71.33, 71.29, 71.26, 71.1, 70.9, 70.8, 70.6, 70.2, 67.8, 63.4, 61.8, 58.84, 58.83, 42.1, 37.3, 34.8, 28.7, 28.4, 26.5, 25.6, 20.7, 19.4, 19.2, 18.6, 18.4, 17.5, 15.2, 14.5, 13.8, 11.2 ppm; **HRMS** ESI+ (MeOH), calculated for  $\text{C}_{78}\text{H}_{126}\text{Cl}_2\text{O}_{30}\text{Na}$   $[\text{M}+\text{Na}]^+$ : 1635.76032, found: 1635.75986.

## SuFEx-Fidaxomicin (8)

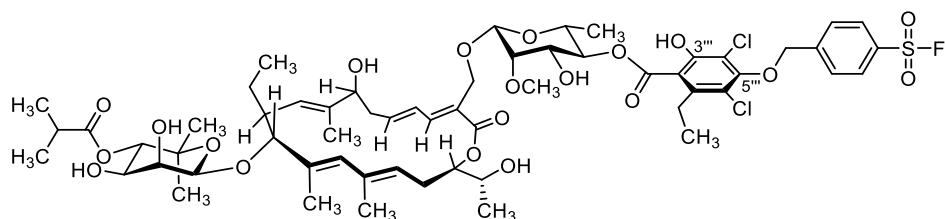

**8a**

Chemical Formula: C<sub>59</sub>H<sub>79</sub>Cl<sub>2</sub>FO<sub>20</sub>S

Exact Mass: 1228.4246

Molecular Weight: 1230.2194

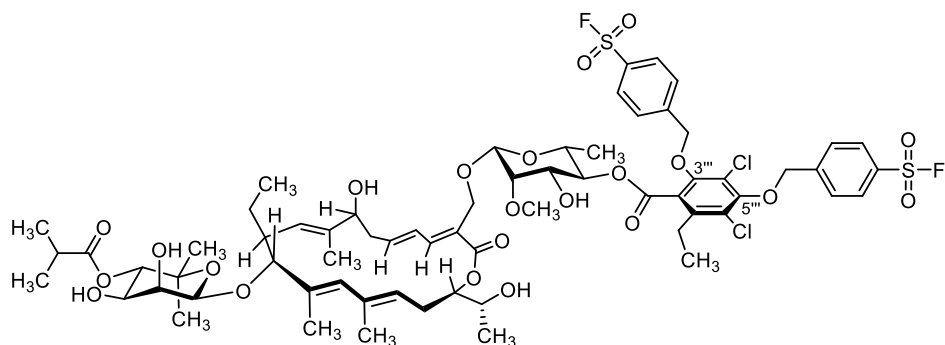

**8b**

Chemical Formula: C<sub>66</sub>H<sub>84</sub>Cl<sub>2</sub>F<sub>2</sub>O<sub>22</sub>S<sub>2</sub>

Exact Mass: 1400.4241

Molecular Weight: 1402.3928

An oven-dried microwave tube under an atmosphere of argon was charged with fidaxomicin (**1**, 52.0 mg, 49.1  $\mu$ mol, 1.0 equiv.) and 4-(bromomethyl)benzene sulfonyl fluoride (22.0 mg, 86.9  $\mu$ mol, 1.8 equiv.). The solids were dissolved in dry DMF (1.5 mL) and K<sub>2</sub>CO<sub>3</sub> (27.0 mg, 0.195 mmol, 4.0 equiv.) was added. The reaction mixture was stirred at 45 °C. After 2 hours, the reaction mixture was diluted with Et<sub>2</sub>O (15 mL) and quenched with a saturated aqueous solution of NH<sub>4</sub>Cl (15 mL). The layers were separated and the aqueous phase extracted with Et<sub>2</sub>O (4 x 15 mL). The organic phase was washed with a saturated aqueous solution of NH<sub>4</sub>Cl (2 x 50 mL). The combined organic phases were dried over anhydrous MgSO<sub>4</sub>. After filtration of the drying agent, the solvent was evaporated under reduced pressure. The crude product was subjected to preparative RP-HPLC [Gemini NX C18, 5  $\mu$ , 110 Å, 250 mm x 21.2 mm; solvent A: H<sub>2</sub>O + 0.1 % HCOOH, solvent B: MeCN + 0.1 % HCOOH; 20 mL/min; LC time program (min – % B): 4.0 min – 60 %, 35.0 min – 85 %, 45.1 min – 100 %;  $\lambda$  = 270 nm] to give the monosubstitution product



**8a** ( $t_R = 22.53\text{--}23.56$  min, 11.0 mg, 8.95  $\mu\text{mol}$ , 16 %) and the disubstitution product **8b** ( $t_R = 32.39\text{--}34.17$  min, 32.0 mg, 22.8  $\mu\text{mol}$ , 47 %) as colourless solids.

### **8a**

**Specific Rotation**  $[\alpha]_D^{24^\circ\text{C}} = -23.3$  ( $\beta = 0.54$  g/100 mL,  $\text{CHCl}_3$ ); **FT-IR**  $\tilde{\nu}$  (film) 3476, 2976, 2935, 2878, 2154, 2081, 1737, 1703, 1642, 1601, 1583, 1554, 1455, 1416, 1387, 1371, 1345, 1296, 1245, 1214, 1145, 1095, 1070, 1027, 900, 779  $\text{cm}^{-1}$ ;  **$^1\text{H NMR}$**  (500 MHz, acetone- $d_6$ )  $\delta$  8.20 (d,  $J = 8.2$  Hz, 2H), 8.04 (d,  $J = 8.2$ , 2H), 7.23 (d,  $J = 11.5$  Hz, 1H), 6.63 (dddd,  $J = 14.7, 11.5, 2.0, 1.0$  Hz, 1H), 5.96 (ddd,  $J = 14.5, 9.5, 4.6$  Hz, 1H), 5.83 (s, 1H), 5.67–5.59 (m, 1H), 5.32 (s, 2H), 5.21 (dt,  $J = 10.4, 1.5$  Hz, 1H), 5.08 (t,  $J = 9.8$  Hz, 1H), 5.00 (d,  $J = 10.1$  Hz, 1H), 4.77 (d,  $J = 1.2$  Hz, 1H), 4.73 (dt,  $J = 6.4, 4.8$  Hz, 1H), 4.68 (d,  $J = 0.8$  Hz, 1H), 4.61 (d,  $J = 11.5$  Hz, 1H), 4.41 (d,  $J = 11.5$  Hz, 1H), 4.27 (m, 1H), 4.09–3.98 (m, 2H), 3.97–3.94 (m, 1H), 3.81 (d,  $J = 3.6$  Hz, 1H), 3.78 (dd,  $J = 9.9, 3.4$  Hz, 1H), 3.76–3.69 (m, 3H), 3.64–3.61 (m, 1H), 3.60–3.55 (m, 1H), 3.52 (s, 3H), 3.25 (d,  $J = 9.4$  Hz, 1H), 2.99–2.86 (m, 2H), 2.81–2.69 (m, 2H), 2.67–2.60 (m, 1H), 2.56 (sept,  $J = 7.1$  Hz, 1H), 2.53–2.40 (m, 2H), 1.99–1.88 (m, 1H), 1.81 (d,  $J = 1.3$  Hz, 3H), 1.73 (d,  $J = 1.3$  Hz, 3H), 1.66 (d,  $J = 1.2$  Hz, 3H), 1.34 (d,  $J = 6.1$  Hz, 1H), 1.29–1.23 (m, 1H), 1.21 (t,  $J = 7.4$  Hz, 1H), 1.18 (d,  $J = 5.7$  Hz, 1H), 1.16–1.12 (m, 9H), 1.09 (s, 3H), 0.83 (t,  $J = 7.5$  Hz, 3H) ppm;  **$^{13}\text{C NMR}$**  (125 MHz, acetone- $d_6$ )  $\delta$  176.8, 167.8, 167.5, 154.01, 152.9, 146.6, 145.4, 143.4, 141.5, 136.9, 136.12, 136.10, 133.8, 133.0 (d,  $^2J_{\text{C-F}} = 24.6$  Hz), 129.9, 129.5, 128.2, 126.3, 125.3, 124.0, 121.1, 119.0, 116.0, 101.9, 96.8, 93.3, 81.6, 78.2, 77.6, 75.70, 75.67, 73.9, 73.8, 72.9, 72.8, 72.4, 70.6, 70.2, 67.7, 63.4, 61.7, 42.0, 37.3, 34.8, 28.7, 28.4, 26.5, 25.9, 20.7, 19.4, 19.2, 18.6, 18.1, 17.5, 15.2, 14.5, 13.8, 11.2 ppm;  **$^{19}\text{F NMR}$**  (377 MHz, acetone- $d_6$ )  $\delta$  64.87 (s) ppm; **HRMS ESI+** (MeOH), calculated for  $\text{C}_{59}\text{H}_{79}\text{Cl}_2\text{FO}_{20}\text{SNa}$   $[\text{M}+\text{Na}]^+$ : 1251.41497, found: 1251.41380.

### **8b**

**Specific Rotation**  $[\alpha]_D^{22^\circ\text{C}} = -41.6$  ( $\beta = 0.45$  g/100 mL,  $\text{CHCl}_3$ ); **FT-IR**  $\tilde{\nu}$  (film) 3474, 2976, 2935, 2878, 2098, 1734, 1703, 1642, 1602, 1569, 1469, 1454, 1409, 1384, 1368, 1330, 1316, 1298, 1250, 1213, 1185, 1137, 1107, 1096, 1068, 1024, 951, 901, 859, 818, 772, 735, 701, 671, 633, 587, 566, 538, 499, 461  $\text{cm}^{-1}$ ;  **$^1\text{H NMR}$**  (500 MHz, acetone- $d_6$ )  $\delta$  8.20 (d,  $J = 6.3$  Hz, 2H), 8.19 (d,  $J = 6.3$  Hz, 2H), 8.05 (d,  $J = 8.2$  Hz, 2H), 7.96 (d,  $J = 8.2$  Hz, 2H), 7.21 (d,  $J = 11.4$  Hz, 1H), 6.64–6.54 (m, 1H), 5.94 (ddd,  $J = 14.5, 9.5, 4.6$  Hz, 1H), 5.82 (s, 1H), 5.66–5.57 (m, 1H), 5.40–5.34 (m, 3H), 5.26 (d,  $J = 12.1$  Hz, 1H), 5.20 (dt,  $J = 10.6, 1.6$  Hz, 1H), 5.02 (t,  $J = 9.7$  Hz, 1H), 4.99 (d,  $J = 10.1$  Hz, 1H), 4.77 (d,  $J = 1.2$  Hz, 1H), 4.74–4.69 (m, 1H), 4.62 (s, 1H), 4.56 (d,  $J = 11.4$  Hz, 1H), 4.36 (d,  $J = 11.4$  Hz, 1H), 4.27 (m, 1H), 4.07–3.97 (m, 2H), 3.98–3.88 (m, 2H), 3.81 (s, 1H), 3.77–3.64 (m, 4H), 3.55 (d,  $J = 3.4$  Hz, 1H), 3.51 (s, 3H), 3.50–3.44 (m, 1H), 3.31–3.22 (m, 1H), 2.98–2.85 (m, 2H), 2.81–2.69 (m, 2H), 2.67–2.60 (m, 1H), 2.56 (sept,  $J = 7.0$  Hz, 1H), 2.52–2.37 (m, 2H), 1.99–1.89 (m, 1H), 1.80 (d,  $J = 1.2$  Hz, 3H), 1.72 (d,  $J = 1.3$  Hz, 3H), 1.65 (d,  $J = 1.2$  Hz, 3H), 1.29–1.23 (m, 1H), 1.21 (t,  $J = 7.4$  Hz, 3H), 1.17 (d,  $J = 5.8$  Hz, 3H), 1.16–1.12 (m, 6H), 1.15 (s, 3H), 1.09 (s, 3H), 0.82 (t,  $J = 7.4$  Hz, 3H) ppm;  **$^{13}\text{C NMR}$**  (126 MHz, acetone- $d_6$ ) (126 MHz, Acetone)  $\delta$  176.8, 167.9, 166.3, 153.6, 151.6, 146.4, 146.3, 145.3, 143.3, 140.6, 136.9, 136.1, 133.8, 133.1 (d,  $^2J_{\text{C-F}} = 24.4$  Hz), 133.0 (d,  $^2J_{\text{C-F}} = 24.4$  Hz), 130.05, 129.98, 129.6, 129.5, 129.1, 128.2, 126.6, 126.4, 125.4, 123.9, 122.4, 101.9, 96.7,

93.3, 81.8, 78.2, 77.7, 75.9, 75.7, 74.2, 73.8, 72.9, 72.8, 72.3, 70.5, 70.2, 67.7, 63.4, 61.7, 42.0, 37.2, 34.8, 28.7, 28.4, 26.5, 25.7, 20.7, 19.4, 19.2, 18.6, 18.1, 17.4, 15.2, 14.4, 13.8, 11.2 ppm; **<sup>19</sup>F NMR** (377 MHz, acetone-*d*<sub>6</sub>) δ 64.93 (s), 64.88 (s) ppm; **HRMS** ESI+ (MeOH), calculated for C<sub>66</sub>H<sub>88</sub>Cl<sub>2</sub>F<sub>2</sub>O<sub>22</sub>S<sub>2</sub>N [M+NH<sub>4</sub>]<sup>+</sup>: 1418.45790, found: 1418.45885.

### Tetrazine-Fidaxomicin (9b)

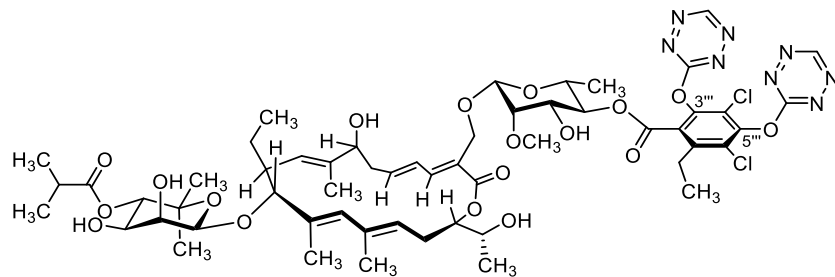

**8b**

Chemical Formula: C<sub>56</sub>H<sub>87</sub>Cl<sub>2</sub>N<sub>8</sub>O<sub>18</sub>

Exact Mass: 1216.4498

Molecular Weight: 1218.1460

This compound was prepared according to a literature procedure.<sup>6</sup>

### 3-Azidopropan-1-ol<sup>7</sup>

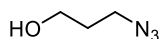

Chemical Formula: C<sub>3</sub>H<sub>7</sub>N<sub>3</sub>O

Exact Mass: 101.0589

Molecular Weight: 101.1090

3-Azidopropan-1-ol was synthesized following a literature procedure.<sup>7</sup> In a 500 mL round-bottom flask, 3-bromopropan-1-ol (12.4 g, 89.2 mmol, 1.0 equiv.) was dissolved in acetone (200 mL). A solution of NaN<sub>3</sub> (29.0 g, 466 mmol, 5.2 equiv.) in H<sub>2</sub>O (120 mL) was added while stirring. A catalytic amount of KI (2.0 mg, 12 μmol) was added. This solution was stirred at room temperature for 48 hours. After extraction with Et<sub>2</sub>O (3 x 80 mL), the combined organic layers were dried over K<sub>2</sub>CO<sub>3</sub>. The drying agent was filtered off and the solvent was evaporated *in vacuo* to give 3-azidopropan-1-ol as a highly viscous colourless oil (8.09 g, 80.0 mmol, 90 %).

**R<sub>f</sub>** (pentane/Et<sub>2</sub>O 1:1) = 0.41; **FT-IR** (film)  $\tilde{\nu}$  = 3352, 2949, 2878, 2513, 2090 (-N<sub>3</sub>), 1641, 1457, 1427, 1371, 1343, 1299, 1258, 1184, 1048, 957, 901, 861, 771, 638, 557, 509 cm<sup>-1</sup>; **<sup>1</sup>H NMR** (400 MHz, CDCl<sub>3</sub>)  $\delta$  3.76 (t, *J* = 6.0 Hz, 2H), 3.46 (t, *J* = 6.6 Hz, 2H), 1.84 (quint, *J* = 6.3 Hz, 2H) ppm; **<sup>13</sup>C NMR** (101 MHz, CDCl<sub>3</sub>)  $\delta$  60.1, 48.7, 31.6 ppm; **HRMS** ESI(+) (MeOH) calculated for C<sub>3</sub>H<sub>7</sub>N<sub>3</sub>ONa [M+Na]<sup>+</sup>: 124.04813, found: 124.04790.

### 3-Azidopropyl 4-nitrobenzenesulfonate<sup>8</sup>

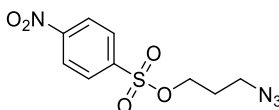

Chemical Formula: C<sub>9</sub>H<sub>10</sub>N<sub>4</sub>O<sub>5</sub>S

Exact Mass: 286.0372

Molecular Weight: 286.2620

3-Azidopropyl 4-nitrobenzenesulfonate was synthesized in analogy to a nosylation procedure reported in literature.<sup>8</sup> In a flame-dried 250 mL three-necked round-bottom flask, 3-azidopropan-1-ol (2.50 g, 24.7 mmol, 1.0 equiv.) was dissolved in dry THF (30 mL). DMAP (453 mg, 3.70 mmol, 0.15 equiv.) and NEt<sub>3</sub> (6.95 mL, 45.5 mmol, 1.8 equiv.) were added. The reaction mixture was cooled to 0 °C and a solution of nosyl chloride (11.0 g, 49.5 mmol, 2.0 equiv.) in THF (100 mL, dry) was added slowly *via* a dropping funnel. As large amounts of precipitate had formed, another

portion of dry THF (50 mL) was added. The reaction mixture was stirred at room temperature for 48 hours. The mixture was diluted with CH<sub>2</sub>Cl<sub>2</sub> (700 mL), washed with a saturated aqueous solution of NaCl (3 x 200 mL), dried over anhydrous MgSO<sub>4</sub>, filtered and concentrated *in vacuo*. After purification by flash column chromatography (SiO<sub>2</sub>, pentane/CH<sub>2</sub>Cl<sub>2</sub> 1:3) the product (4.7 g, 16.5 mmol, 67 %) was obtained as a slightly yellow amorphous solid.

**R<sub>f</sub>** (pentane/Et<sub>2</sub>O 1:1) = 0.59; **FT-IR** (film)  $\tilde{\nu}$  = 2978, 2099 (-N<sub>3</sub>), 1609, 1531, 1479, 1455, 1423, 1403, 1391, 1373, 1349, 1316, 1295, 1227, 1201, 1186, 1171, 1096, 1065, 1017, 930, 904, 874, 855, 826, 761, 746, 732, 682, 608, 569, 528 cm<sup>-1</sup>; **<sup>1</sup>H NMR** (400 MHz, CDCl<sub>3</sub>)  $\delta$  8.45–8.39 (m, 2H), 8.15–8.10 (m, 2H), 4.23 (t, *J* = 6.0 Hz, 2H), 3.42 (t, *J* = 6.4 Hz, 2H), 1.95 (quint, *J* = 6.1 Hz, 1H) ppm; **<sup>13</sup>C NMR** (101 MHz, CDCl<sub>3</sub>)  $\delta$  151.0, 141.6, 129.4, 124.7, 68.3, 47.2, 28.6 ppm; **HRMS** ESI(+) (MeOH) calculated for C<sub>9</sub>H<sub>10</sub>N<sub>4</sub>O<sub>5</sub>S [M]<sup>+</sup>: 286.03774, found: 286.03739.

## Mono(azidopropyl)fidaxomicin (**10a**) and Bis(azidopropyl)fidaxomicin (**10b**)

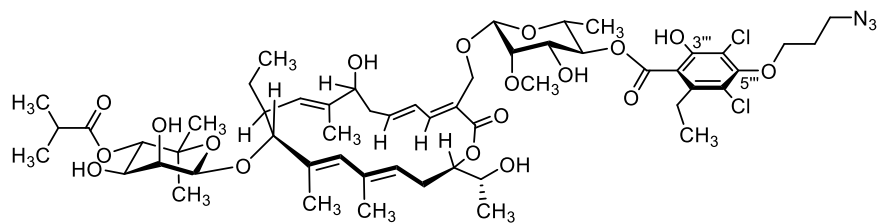

**10a**

Chemical Formula: C<sub>55</sub>H<sub>79</sub>Cl<sub>2</sub>N<sub>3</sub>O<sub>18</sub>

Exact Mass: 1139.4736

Molecular Weight: 1141.1400

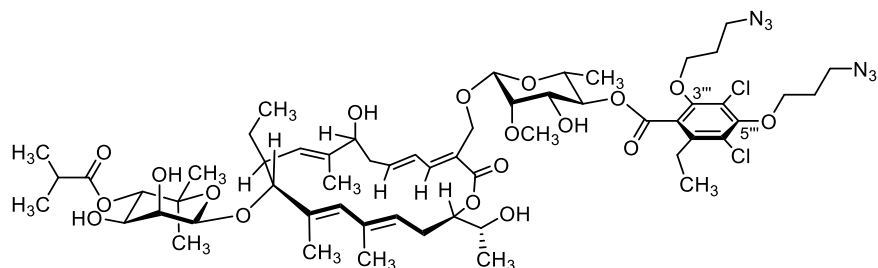

**10b**

Chemical Formula: C<sub>58</sub>H<sub>84</sub>Cl<sub>2</sub>N<sub>6</sub>O<sub>18</sub>

Exact Mass: 1222.5219

Molecular Weight: 1224.2340

Fidaxomicin (**1**, 101 mg, 95.8  $\mu$ mol, 1.0 equiv.) was weighed into a flame-dried 5 mL Schlenk tube under nitrogen atmosphere and dissolved in dry DMF (1.0 mL). 3-Azidopropyl 4-nitrobenzenesulfonate (40.9 mg, 0.143 mmol, 1.5 equiv.) and K<sub>2</sub>CO<sub>3</sub> (60.8 mg, 0.440 mmol, 4.0 equiv.) were added followed by another portion of dry DMF (1 mL). The reaction mixture was stirred at 45 °C for 3 hours. The reaction mixture was diluted with EtOAc (10 mL), washed with a saturated aqueous solution of NH<sub>4</sub>Cl (5 x 10 mL) and dried over anhydrous MgSO<sub>4</sub>. After filtration of the drying agent, the solvent was evaporated under reduced pressure to give a yellow oil. The crude product was purified by preparative RP-HPLC [Gemini NX C18, 10  $\mu$ , 110 Å, 250 mm x 21.2 mm; solvent A: H<sub>2</sub>O+0.1 % HCOOH, solvent B: MeCN+0.1 % HCOOH; 20 mL/min; LC time program (min – % B): 0.0 – 60 %, 3.0 – 60 %, 30.0 – 85 %;  $\lambda$  = 270 nm) to afford the desired products after lyophilization (monosubstituted product **10a**: t<sub>R</sub> = 19.3 min, 20.4 mg, 17.9  $\mu$ mol, 19 %; disubstituted product **10b**: t<sub>R</sub> = 26.9 min, 33.7 mg, 27.5  $\mu$ mol, 29 %).

## 10a

**Specific Rotation**  $[\alpha]_D^{29^\circ C} = -48.9$  ( $\beta = 0.90$  g/100 mL, MeOH); **FT-IR**  $\tilde{\nu}$  (film) 3445, 2978, 2935, 2876, 2099 (-N<sub>3</sub>), 1739, 1697, 1641, 1582, 1471, 1449, 1417, 1387, 1369, 1349, 1299, 1246, 1199, 1146, 1114, 1068, 1025, 948, 903, 855, 800, 767, 745, 713, 504 cm<sup>-1</sup>; **<sup>1</sup>H NMR** (500 MHz, acetone-*d*<sub>6</sub>)  $\delta$  7.23 (d,  $J = 11.4$  Hz, 1H), 6.63 (dd,  $J = 15.3, 11.9$  Hz, 1H), 5.96 (ddd,  $J = 14.9, 9.6, 4.7$  Hz, 1H), 5.83 (s, 1H), 5.62 (t,  $J = 8.3$  Hz, 1H), 5.21 (d,  $J = 10.5$  Hz, 1H), 5.07 (t,  $J = 9.8$  Hz, 1H), 4.99 (d,  $J = 10.1$  Hz, 1H), 4.77 (d,  $J = 1.0$  Hz, 1H), 4.75–4.70 (m, 1H), 4.68–4.66 (m, 1H), 4.60 (d,  $J = 11.5$  Hz, 1H), 4.41 (d,  $J = 11.5$  Hz, 1H), 4.28–4.25 (m, 1H), 4.16 (t,  $J = 6.0$  Hz, 2H), 4.13–4.06 (m, 1H), 4.06–3.97 (m, 1H), 3.97–3.94 (m, 1H), 3.90–3.80 (m, 1H), 3.76 (dd,  $J = 9.9, 3.4$  Hz, 1H), 3.75–3.71 (m, 2H), 3.69 (t,  $J = 6.7$  Hz, 2H), 3.59–3.54 (m, 1H), 3.60–3.55 (m, 1H), 3.52 (s, 3H), 3.38–3.25 (s, br, 1H), 2.96–2.81 (m, 2H), 2.79–2.71 (m, 1H), 2.71–2.66 (m, 1H), 2.67–2.60 (m, 1H), 2.56 (sept,  $J = 7.0$  Hz, 1H), 2.53–2.46 (m, 1H), 2.44 (ddd,  $J = 14.0, 9.1, 4.4$  Hz, 1H), 2.12 (quint,  $J = 6.4$  Hz, 2H), 2.09 (s, br, 1H), 1.98–1.90 (m, 1H), 1.81 (d,  $J = 1.4$  Hz, 3H), 1.73 (d,  $J = 1.4$  Hz, 3H), 1.65 (d,  $J = 1.3$  Hz, 3H), 1.33 (d,  $J = 6.2$  Hz, 3H), 1.30–1.22 (m, 1H), 1.19 (t,  $J = 7.4$  Hz, 3H), 1.17 (d,  $J = 6.2$  Hz, 3H), 1.15 (d,  $J = 7.0$  Hz, 3H), 1.15 (s, 3H), 1.13 (d,  $J = 7.0$  Hz, 3H), 1.09 (s, 3H), 0.82 (t,  $J = 7.5$  Hz, 3H) ppm; **<sup>13</sup>C NMR** (126 MHz, acetone-*d*<sub>6</sub>)  $\delta$  176.8, 167.8, 167.7, 154.7, 153.1, 145.4, 143.4, 141.5, 136.9, 136.13, 136.11, 133.8, 128.2, 126.4, 125.3, 124.0, 121.0, 118.3, 115.9, 101.8, 96.8, 93.3, 81.6, 78.2, 77.5, 75.7, 73.8, 72.9, 72.8, 72.4, 71.1, 70.6, 70.2, 67.7, 63.4, 61.7, 48.9, 42.0, 37.3, 34.8, 32.1, 28.7, 28.4, 26.5, 25.9, 20.7, 19.4, 19.2, 18.6, 18.1, 17.5, 15.2, 14.5, 13.8, 11.2 ppm; **HRMS** ESI+ (MeOH), calculated for C<sub>55</sub>H<sub>79</sub>Cl<sub>2</sub>N<sub>3</sub>O<sub>18</sub>Na [M+Na]<sup>+</sup>: 1162.46279, found: 1162.46327.

## 10b

**Specific Rotation**  $[\alpha]_D^{29^\circ C} = -44.5$  ( $\beta = 0.70$  g/100 mL, MeOH); **FT-IR**  $\tilde{\nu}$  (film) 3474, 2976, 2935, 2876, 2098 (-N<sub>3</sub>), 1738, 1692, 1641, 1569, 1470, 1412, 1381, 1298, 1248, 1198, 1137, 1117, 1067, 1023, 950, 901, 855, 798, 754, 712, 667, 505 cm<sup>-1</sup>; **<sup>1</sup>H NMR** (500 MHz, acetone-*d*<sub>6</sub>)  $\delta$  7.22 (d,  $J = 11.4$  Hz, 1H), 6.62 (dd,  $J = 15.4, 11.9$  Hz, 1H), 5.95 (ddd,  $J = 14.7, 9.5, 4.6$  Hz, 1H), 5.83 (s, 1H), 5.62 (t,  $J = 8.2$  Hz, 1H), 5.21 (d,  $J = 10.6$  Hz, 1H), 5.03 (t,  $J = 9.7$  Hz, 1H), 4.99 (d,  $J = 10.1$  Hz, 1H), 4.77 (s, 1H), 4.75–4.69 (m, 1H), 4.65 (s, 1H), 4.60 (d,  $J = 11.4$  Hz, 1H), 4.40 (d,  $J = 11.4$  Hz, 1H), 4.29–4.24 (m, 1H), 4.24–4.20 (m, 1H), 4.19–4.13 (m, 2H), 4.12–4.06 (m, 1H), 4.06–3.98 (m, 2H), 3.95 (d,  $J = 3.2$  Hz, 1H), 3.87 (d,  $J = 10.1$  Hz, 1H), 3.81 (s, br, 1H), 3.77–3.64 (m, 6H), 3.59 (t,  $J = 6.8$  Hz, 2H), 3.57–3.53 (m, 2H), 3.53 (s, 3H), 3.26 (s, br, 1H), 2.96–2.73 (m, 2H), 2.84–2.70 (m, 1H), 2.71–2.66 (m, 1H), 2.67–2.59 (m, 1H), 2.56 (sept,  $J = 7.1$  Hz, 1H), 2.53–2.46 (m, 1H), 2.46–2.40 (m, 1H), 2.13 (quint,  $J = 6.3$  Hz, 2H), 2.07 (m, 2H), 1.97–1.89 (m, 1H), 1.81 (s, 3H), 1.73 (s, 3H), 1.65 (s, 3H), 1.36 (d,  $J = 6.4$  Hz, 3H), 1.30–1.20 (m, 1H), 1.19–1.12 (m, 15H), 1.09 (s, 3H), 0.82 (t,  $J = 7.4$  Hz, 3H) ppm; **<sup>13</sup>C NMR** (126 MHz, acetone-*d*<sub>6</sub>)  $\delta$  176.8, 167.9, 166.4, 154.0, 152.2, 145.3, 143.3, 140.1, 136.9, 136.1, 133.8, 128.5, 128.2, 126.4, 125.8, 125.4, 124.0, 122.1, 101.9, 96.8, 93.3, 81.9, 78.2, 77.6, 75.7, 73.8, 73.1, 72.9, 72.8, 72.4, 71.3, 70.6, 70.2, 67.7, 63.4, 61.8, 48.84, 48.77, 42.0, 37.3, 34.8, 28.7, 28.4, 26.5, 25.6, 20.7, 19.4, 19.2, 18.6, 18.3, 17.5, 15.2, 14.4, 13.8, 11.2 ppm; **HRMS** ESI+ (MeOH), calculated for C<sub>58</sub>H<sub>84</sub>Cl<sub>2</sub>N<sub>6</sub>O<sub>18</sub>Na [M+Na]<sup>+</sup>: 1245.51114, found: 1245.50954.

## Monotriazole (11a) and Bistriazole with Ethynylaniline (11b)

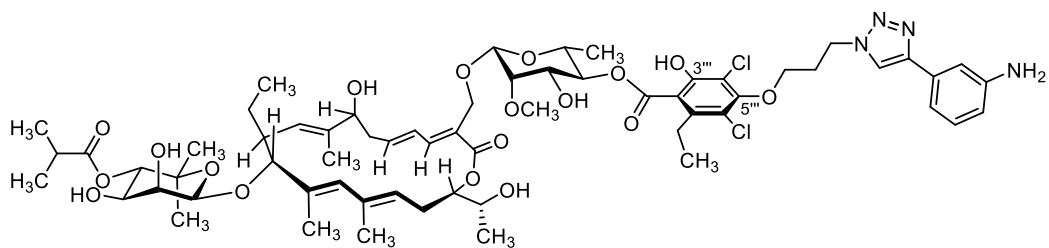

**11a**

Chemical Formula:  $C_{63}H_{86}Cl_2N_4O_{18}$

Exact Mass: 1256.5314

Molecular Weight: 1258.2910

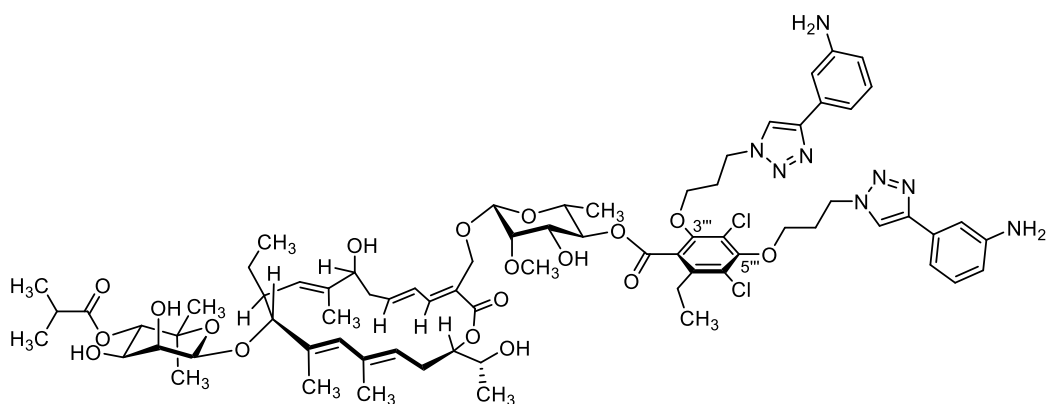

**11b**

Chemical Formula:  $C_{74}H_{98}Cl_2N_8O_{18}$

Exact Mass: 1456.6376

Molecular Weight: 1458.5360

A flame-dried Schlenk tube under an atmosphere of argon was charged with fidaxomicin (70.0 mg, 66.2  $\mu$ mol, 1.0 equiv.). 3-Azidopropyl 4-nitrobenzenesulfonate (23.0 mg, 80.3  $\mu$ mol, 1.2 equiv.) was added. The flask was evacuated and flushed with argon several times. The two solids were dissolved in dry DMF (1.0 mL) and solid  $K_2CO_3$  (37.0 mg, 0.268 mmol, 4.0 equiv.) was added followed by another portion of dry DMF (1.5 mL). The reaction mixture was stirred at 40  $^{\circ}C$ . After 2 hours, the reaction temperature was raised to 45  $^{\circ}C$ . After 4.5 hours, the reaction mixture was diluted with EtOAc (15 mL) and a saturated aqueous solution of  $NH_4Cl$  (20 mL) was added. The aqueous phase was extracted with EtOAc (15 mL). The combined organic phases were washed with a

saturated aqueous solution of NH<sub>4</sub>Cl (3 x 15 mL) and dried over anhydrous MgSO<sub>4</sub>. After filtration of the drying agent, the solvent was evaporated under reduced pressure to afford the crude azides **10a** and **10b**.

The dinuclear CuAAC catalyst (9.6 mg, 13.6 μmol) of Straub *et al.*<sup>9</sup> was weighed into an oven-dried Schlenk flask under an atmosphere of argon. The crude mixture from the preceding reaction containing fidaxomicin as well as mono(azidopropyl)- and bis(azidopropyl)fidaxomicin was dissolved in dry CH<sub>2</sub>Cl<sub>2</sub> (2.0 mL) and added to the catalyst. Glacial acetic acid (100 %, 11 μL, 0.195 mmol) and 3-ethynylaniline (22 μL, 0.195 mmol; distilled prior to use at 110 °C oil bath temperature and 3 mbar) were dissolved in dry CH<sub>2</sub>Cl<sub>2</sub> (0.8 mL) and added to the reaction mixture, which turned bright yellow upon addition of the alkyne solution. After 4 hours, the reaction mixture was diluted with dry CH<sub>2</sub>Cl<sub>2</sub> (10 mL), washed with a saturated aqueous solution of NaCl (3 x 10 mL) and dried over anhydrous MgSO<sub>4</sub>. After filtration of the drying agent, the solvent was removed *in vacuo*. The product mixture was separated by preparative RP-HPLC [Gemini NX C18, 5 μ, 110 Å, 250 mm x 21.2 mm; solvent A: H<sub>2</sub>O +0.1 % HCOOH, solvent B: MeCN+0.1 % HCOOH; 20 mL/min; LC time program (min – % B): 5.0 min – 40 %, 36.0 min – 65 %, 39.0 min – 80 %, 39.1 min – 100 %; λ = 270 nm] to give the monotriazole product **11a** (t<sub>R</sub> = 22.6–25.8 min, 18.0 mg, 14.5 μmol, 22 % over two steps) and the bistriazole **11b** (t<sub>R</sub> = 26.5–28.8 min, 19.0 mg, 12.8 μmol, 19 % over two steps) as well as recovered fidaxomicin starting material (t<sub>R</sub> = 31.2 min, 12.1 mg, 11.4 μmol, 17 %) as colourless solids.

### **11a**

**Specific Rotation**  $[\alpha]_D^{25^\circ C} = -42.1$  ( $\beta = 0.53$  g/100 mL, CHCl<sub>3</sub>); **FT-IR**  $\tilde{\nu}$  (film) 3364, 2976, 2934, 2875, 1734, 1699, 1640, 1591, 1456, 1417, 1387, 1370, 1243, 1200, 1145, 1111, 1067, 1025, 900, 872, 783, 745, 693 cm<sup>-1</sup>; **<sup>1</sup>H NMR** (400 MHz, CD<sub>2</sub>Cl<sub>2</sub>)  $\delta$  7.87 (s, 1H), 7.26–7.09 (m, 4H), 6.65 (ddd,  $J = 7.8, 2.4, 1.2$  Hz, 1H), 6.58 (ddd,  $J = 15.0, 11.4, 1.6$  Hz, 1H), 5.93–5.78 (m, 1H), 5.85 (s, 1H), 5.48 (t,  $J = 8.2$  Hz, 1H), 5.06 (t,  $J = 9.6$  Hz, 1H), 5.00–4.95 (m, 1H), 4.89 (d,  $J = 10.0$  Hz, 1H), 4.73 (t,  $J = 7.0$  Hz, 2H), 4.77–4.67 (m, 1H), 4.65 (d,  $J = 1.3$  Hz, 1H), 4.63 (d,  $J = 11.5$  Hz, 1H), 4.59 (d,  $J = 0.9$  Hz, 1H), 4.39 (d,  $J = 11.4$  Hz, 1H), 4.12 (t,  $J = 5.7$  Hz, 2H), 4.04–3.99 (m, 1H), 3.97 (dd,  $J = 3.4, 1.2$  Hz, 1H), 3.71–3.60 (m, 4H), 3.58 (s, 3H), 3.51 (dq,  $J = 9.6, 6.2$  Hz, 1H), 3.00 (qd,  $J = 7.3, 1.5$  Hz, 2H), 2.78–2.64 (m, 3H), 2.58 (sept,  $J = 7.0$  Hz, 1H), 2.56–2.42 (m, 3H), 2.34–2.25 (m, 1H), 1.94–1.84 (m, 1H), 1.89 (s, 3H), 1.79 (d,  $J = 1.2$  Hz, 3H), 1.67 (s, 3H), 1.31 (d,  $J = 6.2$  Hz, 3H), 1.27–1.19 (m, 1H), 1.21 (t,  $J = 7.4$  Hz, 3H), 1.19–1.13 (m, 9H), 1.10 (s, 3H), 1.09 (s, 3H), 0.83 (t,  $J = 7.4$  Hz, 3H) ppm; **<sup>13</sup>C NMR** (126 MHz, CD<sub>2</sub>Cl<sub>2</sub>)  $\delta$  177.6, 169.5, 169.0, 156.0, 155.7, 148.1, 147.7, 144.7, 143.2, 141.8, 137.4, 136.6, 135.2, 134.5, 132.3, 130.3, 129.1, 128.0, 125.5, 123.6, 121.7, 120.9, 116.2, 115.8, 115.2, 113.6, 112.4, 102.0, 95.5, 93.0, 80.7, 79.8, 77.5, 75.3, 73.8, 73.1, 72.3, 72.2, 70.5, 70.3, 69.3, 63.7, 62.2, 47.7, 42.2, 37.3, 34.8, 31.4, 29.0, 28.4, 26.4, 26.3, 19.4, 19.2, 18.9, 18.6, 18.0, 17.4, 15.6, 14.4, 14.0, 11.3 ppm; **HRMS** ESI<sup>-</sup> (MeOH), calculated for C<sub>63</sub>H<sub>85</sub>Cl<sub>2</sub>N<sub>4</sub>O<sub>18</sub> [M–H]<sup>-</sup>: 1255.52414, found: 1255.52560.



## 11b

**Specific Rotation**  $[\alpha]_D^{29^\circ C} = -11.2$  ( $\beta = 0.10$  g/100 mL, MeOH); **FT-IR**  $\tilde{\nu}$  (film) 3364, 2976, 2934, 2875, 1734, 1699, 1640, 1591, 1456, 1417, 1387, 1370, 1243, 1200, 1145, 1111, 1067, 1025, 900, 872, 783, 745, 693  $\text{cm}^{-1}$ ;  **$^1\text{H}$  NMR** (500 MHz,  $\text{CD}_2\text{Cl}_2$ )  $\delta$  7.85 (s, 1H), 7.85 (s, 1H), 7.24–7.22 (m, 1H), 7.22–7.21 (m, 1H), 7.21–7.16 (m, 2H), 7.16–7.10 (m, 3H), 6.67–6.62 (m, 2H), 6.61–6.55 (m, 1H), 5.91–5.79 (m, 2H), 5.84 (s, 1H), 5.51–5.45 (m, 1H), 5.00–4.94 (m, 2H), 4.89 (d,  $J = 10.0$  Hz, 1H), 4.73–4.68 (m, 3H), 4.64 (d,  $J = 1.2$  Hz, 1H), 4.62–4.56 (m, 3H), 4.53 (s, 1H), 4.38 (d,  $J = 11.4$  Hz, 1H), 4.23 (s, br, 1H), 4.15–4.06 (m, 3H), 4.03–3.93 (m, 3H), 3.67–3.53 (m, 7H), 3.44–3.38 (m, 1H), 2.86–2.61 (m, 5H), 2.58 (sept,  $J = 6.8$  Hz, 1H), 2.54–2.36 (m, 5H), 2.32–2.25 (m, 1H), 1.89 (s, 3H), 1.78 (s, 3H), 1.66 (s, 3H), 1.34 (d,  $J = 6.1$  Hz, 3H), 1.33–1.13 (m, 13H), 1.10 (s, 3H), 1.09 (s, 3H), 0.82 (t,  $J = 7.5$  Hz, 3H) ppm;  **$^{13}\text{C}$  NMR** (126 MHz,  $\text{CD}_2\text{Cl}_2$ )  $\delta$  177.5, 169.0, 166.5, 153.6, 151.7, 148.14, 148.10, 147.91, 147.88, 144.7, 141.8, 140.0, 137.4, 136.6, 135.1, 134.5, 132.29, 132.27, 130.3, 129.2, 128.1, 127.8, 125.9, 125.6, 123.6, 121.7, 120.9, 120.8, 116.11, 116.09, 115.19, 115.17, 112.42, 112.35, 101.8, 95.5, 93.0, 81.0, 79.7, 77.3, 75.3, 73.8, 73.1, 72.4, 72.3, 72.2, 70.6, 70.5, 70.3, 69.3, 63.6, 62.2, 47.7, 47.6, 42.3, 37.3, 34.7, 31.3, 31.1, 28.9, 28.4, 26.3, 25.7, 19.4, 19.2, 18.9, 18.6, 18.1, 17.4, 15.6, 14.3, 14.0, 11.3 ppm; **HRMS** ESI+ (MeOH), calculated for  $\text{C}_{74}\text{H}_{99}\text{Cl}_2\text{N}_8\text{O}_{18}$   $[\text{M}+\text{H}]^+$ : 1457.64489, found: 1457.64631.

## Monotriazole with PEG5-acid (12a)

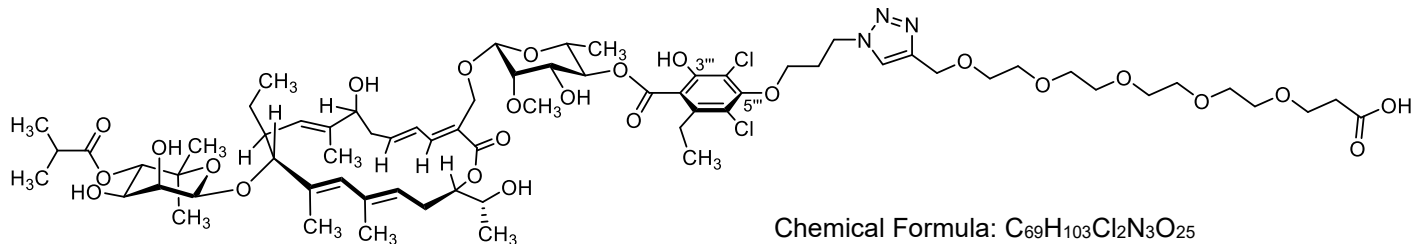

Exact Mass: 1443.6258

Molecular Weight: 1445.4790

A flame-dried 5 mL flask was charged with a solution of alkyne-PEG5-acid (8.8 mg, 29  $\mu$ mol, 1.5 equiv.) in a solvent mixture of *t*-BuOH/H<sub>2</sub>O (1:1, degassed by freeze-pump-thaw cycling, 1.5 mL). 3-Azidopropylfidaxomicin **10a** (22.0 mg, 19.3  $\mu$ mol, 1.0 equiv.) as well as solid Cu(I)OAc (2.4 mg, 19  $\mu$ mol, 1.0 equiv.) were added. The mixture was stirred at room temperature under an atmosphere of argon for 14 hours. It was diluted with CH<sub>2</sub>Cl<sub>2</sub> and washed with a saturated aqueous solution of NaCl (3x). The combined organic phases were dried over anhydrous MgSO<sub>4</sub>. After filtration of the drying agent, the solvent was evaporated under reduced pressure. The product was purified by preparative RP-HPLC (Gemini NX C18, 5  $\mu$ , 110 Å, 250 mm x 21.2 mm; solvents: H<sub>2</sub>O+0.1 % HCOOH; MeCN+0.1 % HCOOH; 20 mL/min; LC time program (min – % B): 0.0 – 5 %, 10.0 – 5 %, 12.0 – 55 %, 50.0 – 65 %, 51.0 – 100 %;  $\lambda$  = 270 nm;  $t_R$  = 20.8 min) to afford **12a** after lyophilization (8.60 mg, 5.950  $\mu$ mol, 31 %).

**Specific Rotation**  $[\alpha]_D^{26^\circ C} = -57.9$  ( $\beta = 0.25$  g/100 mL, MeOH); **FT-IR** (film)  $\tilde{\nu} = 3441, 2975, 2934, 2875, 1735, 1704, 1642, 1580, 1452, 1417, 1386, 1370, 1349, 1297, 1243, 1199, 1111, 1092, 1071, 1027, 903, 768$  cm<sup>-1</sup>; **<sup>1</sup>H NMR** (500 MHz, CD<sub>2</sub>Cl<sub>2</sub>)  $\delta$  7.73 (s, 1H), 7.15 (d,  $J = 11.5$  Hz, 1H), 6.58 (dd,  $J = 14.8, 11.5$  Hz, 1H), 5.94–5.76 (m, 1H), 5.85 (s, 1H), 5.48 (t,  $J = 8.2$  Hz, 1H), 5.05 (t,  $J = 9.6$  Hz, 1H), 4.98 (d,  $J = 10.6$  Hz, 1H), 4.89 (d,  $J = 10.0$  Hz, 1H), 4.74–4.54 (m, 7H), 4.39 (d,  $J = 11.5$  Hz, 1H), 4.24 (s, br, 1H), 4.09 (t,  $J = 5.7$  Hz, 2H), 4.04–3.99 (m, 1H), 3.98–3.95 (m, 1H), 3.73 (t,  $J = 5.9$  Hz, 2H), 3.69–3.49 (m, 24H), 3.58 (s, 3H), 2.99 (q,  $J = 7.2$  Hz, 2H), 2.78–2.64 (m, 3H), 2.63–2.44 (m, 5H), 2.33–2.25 (m, 1H), 1.99–1.83 (m, 1H), 1.89 (s, 3H), 1.79 (s, 3H), 1.67 (s, 3H), 1.32 (d,  $J = 6.1$  Hz, 3H), 1.24–1.14 (m, 1H), 1.21 (t,  $J = 7.4$  Hz, 3H), 1.20–1.13 (m, 9H), 1.10 (s, 3H), 1.09 (s, 3H), 0.83 (t,  $J = 7.4$  Hz, 3H) ppm; **<sup>13</sup>C NMR** (126 MHz, CD<sub>2</sub>Cl<sub>2</sub>)  $\delta$  177.5, 173.4, 169.5, 169.0, 155.9, 155.5, 145.3, 144.7, 143.1, 141.8, 137.4, 136.6, 135.2, 134.5, 129.1, 128.1, 125.5, 124.0, 123.5, 121.6, 115.8, 113.7, 101.9, 95.5, 93.0, 80.7, 79.8, 77.4, 75.3, 73.7, 73.1, 72.23, 72.16, 71.1, 71.03, 71.01, 70.90, 70.89, 70.88, 70.6, 70.5, 70.4, 70.3, 70.1, 69.3, 67.1, 64.7, 63.7, 62.2, 47.8, 42.3, 37.3, 34.7, 31.3, 29.0, 28.4, 26.4, 26.3, 19.4, 19.2, 18.8, 18.6, 18.0, 17.3, 15.6, 14.3, 14.0, 11.3 ppm; **<sup>1</sup>H NMR** (500 MHz, CD<sub>3</sub>OD)  $\delta$  8.07 (s, 1H), 7.21 (d,  $J = 11.4$  Hz, 1H), 6.64–6.54 (m, 1H), 5.95 (ddd,  $J = 14.6, 9.4, 4.8$  Hz, 1H), 5.83 (s, 1H), 5.56 (t,  $J = 8.2$  Hz, 1H), 5.13 (dt,  $J = 10.5, 1.6$  Hz, 1H), 5.05 (t,  $J = 9.8$  Hz, 1H), 5.02 (d,  $J = 10.2$  Hz, 1H), 4.75–4.69 (m, 4H), 4.66 (s, 2H), 4.63–4.59 (m, 2H), 4.42 (d,  $J = 11.5$  Hz, 1H), 4.24–4.20 (br m, 1H), 4.07 (t,  $J = 5.8$  Hz, 2H), 4.02 (p,  $J = 6.4$  Hz, 1H), 3.92 (dd,  $J = 3.2, 1.1$  Hz, 1H), 3.75–3.57 (m, 21H), 3.56 (s, 3H), 3.55 (d,  $J = 3.5$  Hz, 1H), 3.53–3.48 (m, 1H), 2.82 (qd,  $J = 7.5, 1.6$  Hz, 2H), 2.71 (tt,  $J =$

13.9, 5.0 Hz, 3H), 2.59 (sept,  $J = 7.1$  Hz, 1H), 2.55–2.39 (m, 6H), 2.03–1.97 (m, 1H), 1.81 (s, 3H), 1.76 (s, 3H), 1.66 (s, 3H), 1.38 (d,  $J = 6.2$  Hz, 3H), 1.32–1.23 (m, 1H), 1.20–1.11 (m, 18H), 0.87 (t,  $J = 7.4$  Hz, 3H) ppm;  $^{13}\text{C}$  NMR (126 MHz,  $\text{CD}_3\text{OD}$ )  $\delta$  178.4, 176.0, 169.1, 168.2, 154.2, 152.3, 146.2, 146.1, 143.7, 140.9, 137.04, 136.97, 136.4, 134.6, 128.5, 126.9, 125.7, 124.6, 121.1, 120.9, 116.0, 102.3, 97.2, 94.3, 82.5, 78.6, 76.9, 75.9, 74.5, 73.5, 73.2, 72.8, 71.6, 71.53, 71.49, 71.4, 71.3, 71.0, 70.7, 70.5, 68.3, 68.1, 65.0, 63.9, 62.2, 48.5, 42.5, 37.3, 36.2, 35.4, 31.8, 28.7, 38.3, 26.9, 26.1, 20.3, 19.5, 19.1, 18.7, 18.0, 17.5, 15.4, 14.6, 13.9, 11.3 ppm; **HRMS** ESI<sup>-</sup> (MeOH), calculated for  $\text{C}_{69}\text{H}_{102}\text{Cl}_2\text{N}_3\text{O}_{25}$   $[\text{M}-\text{H}]^-$ : 1442.61849, found: 1442.61987.

### Monotriazole with Piperidin-4-amine Substituent (13a)

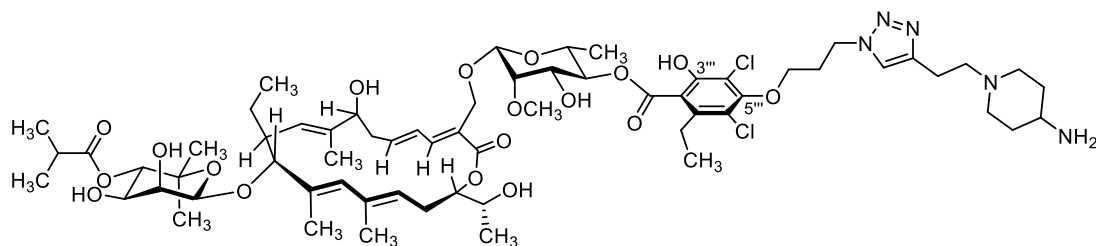

#### 13a

Chemical Formula: C<sub>64</sub>H<sub>95</sub>Cl<sub>2</sub>N<sub>5</sub>O<sub>18</sub>

Exact Mass: 1291.6049

Molecular Weight: 1293.3810

In an oven-dried Schlenk-tube, Cu(I)OAc (1.2 mg, 9.7  $\mu$ mol, 0.5 equiv.) was added to a solution of fidaxomicin-monoazide **10a** (22.0 mg, 19.3  $\mu$ mol, 1.0 equiv.) and 1-(but-3-yn-1-yl)piperidine-4-amine dihydrochloride (8.7 mg, 39  $\mu$ mol, 1.3 equiv.) in *t*-BuOH/H<sub>2</sub>O (1:1, 2.0 mL, degassed by freeze-pump-thaw cycling). This mixture was stirred at room temperature for 30 hours under argon atmosphere. The solvent was evaporated under reduced pressure and the obtained solid was dissolved in MeOH/H<sub>2</sub>O (7:3) and filtered over an SPE-C18 cartridge. The product was further purified by RP-HPLC [Gemini NX-C18, 5 $\mu$ m, 110 Å, 250 mm x 21.2 mm; solvent A: H<sub>2</sub>O+0.1% HCOOH, solvent B: MeCN+0.1% HCOOH; 20 mL/min; LC time program (min – %B): 0.0 – 5 %, 30.0 – 95 %, 31.0 – 100%] to afford, after lyophilization, **12a** ( $t_R$  = 17.2 min, 14.2 mg, 11.0  $\mu$ mol, 57 %) as a colourless solid.

**Specific Rotation**  $[\alpha]_D^{26^\circ C} = +84.0$  ( $\beta = 0.19$  g/100 mL, MeOH); **FTIR** (film)  $\tilde{\nu} = 3378, 2974, 2933, 1708, 1598, 1411, 1381, 1245, 1210, 1115, 1068, 1029, 902$  cm<sup>-1</sup>; **<sup>1</sup>H NMR** (500 MHz, CD<sub>3</sub>OD)  $\delta$  7.81 (s, 1H), 7.12 (d,  $J = 11.3$  Hz, 1H), 6.54–6.45 (m, 1H), 5.85 (ddd,  $J = 14.7, 9.5, 4.8$  Hz, 1H), 5.74 (s, 1H), 5.47 (t,  $J = 8.2$  Hz, 1H), 5.03 (d,  $J = 10.6$  Hz, 1H), 4.97–4.90 (m, 2H), 4.64–4.58 (m, 4H), 4.52–4.46 (m, 2H), 4.33 (d,  $J = 11.6$  Hz, 1H), 4.13 (m, br, 1H), 3.96–3.86 (m, 3H), 3.83 (d,  $J = 3.2$  Hz, 1H), 3.65–3.59 (m, 3H), 3.48 (d,  $J = 3.6$  Hz, 1H), 3.46 (s, 3H), 3.44–3.38 (m, 1H), 2.92–2.86 (m, 2H), 2.80 (t,  $J = 7.0$  Hz, 2H), 2.70–2.54 (m, 6H), 2.50 (quint,  $J = 7.1$  Hz, 1H), 2.43–2.29 (m, 4H), 1.91–1.83 (m, 2H), 1.93–1.86 (m, 1H), 1.83–1.75 (m, 2H), 1.72 (s, 3H), 1.67 (s, 3H), 1.56 (s, 3H), 1.55–1.44 (m, 2H), 1.27 (d,  $J = 6.1$  Hz, 3H), 1.22–1.12 (m, 1H), 1.10–1.02 (m, 18H), 0.77 (t,  $J = 7.4$  Hz, 3H) ppm; **<sup>13</sup>C NMR** (126 MHz, CD<sub>3</sub>OD)  $\delta$  178.4, 169.1, 168.5, 154.2, 153.4, 146.7, 146.2, 143.7, 140.5, 137.04, 136.96, 136.4, 134.6, 128.5, 126.9, 125.7, 124.6, 124.1, 120.3, 116.1, 102.2, 97.2, 94.3, 82.3, 78.6, 77.1, 75.9, 74.5, 73.5, 73.2, 73.0, 71.6, 70.9, 70.5, 68.3, 63.9, 62.2, 58.3, 52.3, 49.6, 48.3, 42.5, 37.3, 35.4, 31.7, 30.8, 28.7, 28.3, 26.9, 26.1, 23.9, 20.3, 19.5, 19.1, 18.7, 18.0, 17.5, 15.4, 14.5, 13.9, 11.3 ppm; **HRMS** ESI+ (MeOH), calculated for C<sub>64</sub>H<sub>96</sub>Cl<sub>2</sub>N<sub>5</sub>O<sub>18</sub> [M+H]<sup>+</sup>: 1292.61219, found: 1292.61307.

## Ditriazole with Piperidin-4-amine Substituent (13b)

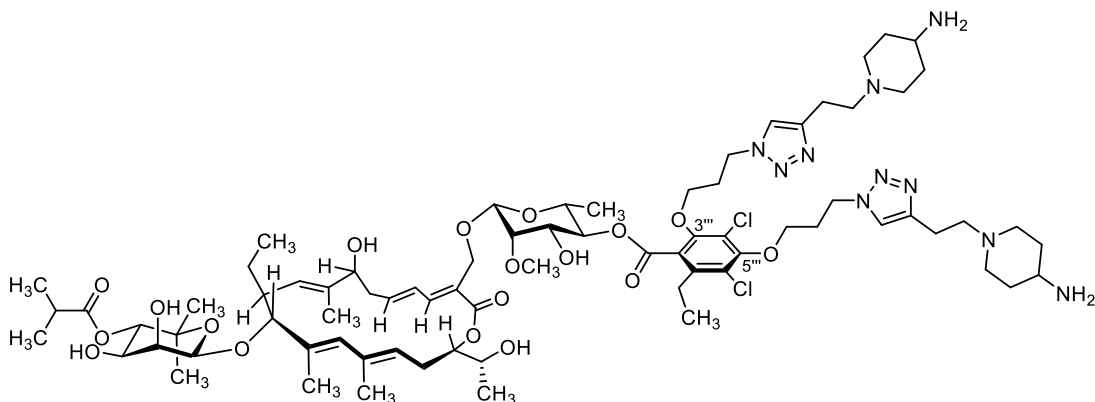

**13b**

Chemical Formula: C<sub>76</sub>H<sub>116</sub>Cl<sub>2</sub>N<sub>10</sub>O<sub>18</sub>

Exact Mass: 1526.7846

Molecular Weight: 1528.7160

An oven-dried Schlenk tube was charged with a solution of bis(3-azidopropyl)fidaxomicin **10b** (15.2 mg, 12.4  $\mu$ mol, 1.0 equiv.) and 1-(but-3-yn-1-yl)piperidine-4-amine dihydrochloride (7.0 mg, 31  $\mu$ mol, 2.5 equiv.) in *t*-BuOH/H<sub>2</sub>O (1:1, 1.4 mL, degassed by freeze-pump-thaw cycling). Cu(I)OAc (0.5 mg, 3.7  $\mu$ mol, 0.3 equiv.) was added and the reaction mixture stirred at room temperature for 24 hours under an atmosphere of argon. The solvent was evaporated under reduced pressure and the obtained solid was dissolved in MeOH/H<sub>2</sub>O (3:2) and filtered over an SPE-C18 cartridge. The product was purified by preparative RP-HPLC [Gemini NX C18, 5  $\mu$ , 110  $\text{Å}$ , 250 mm x 21.2 mm; solvent A: H<sub>2</sub>O+0.1 % HCOOH, solvent B: MeCN+0.1 % HCOOH; 20 mL/min; LC time program (min – % B): 0.0 – 5 %, 5.0 – 5 %, 30.0 – 95 %, 31.0 – 100 %] to afford, after lyophilization, **13b** as a colourless solid ( $t_R$ =15.0 min, 8.2 mg, 5.0  $\mu$ mol, 43 %).

**Specific Rotation**  $[\alpha]_D^{26^\circ C} = +8.6$  ( $\beta = 0.38$  g/100 mL, MeOH); **FT-IR** (film)  $\tilde{\nu} = 3359, 3143, 2970, 2935, 1733, 1704, 1638, 1591, 1469, 1457, 1434, 1413, 1382, 1372, 1348, 1316, 1249, 1199, 1132, 1112, 1091, 1068, 1028, 902, 793$  cm<sup>-1</sup>; **<sup>1</sup>H NMR** (500 MHz, CD<sub>3</sub>OD)  $\delta$  8.57 (s, br, 1H), 7.88 (s, 1H), 7.87 (s, 1H), 7.21 (d,  $J = 11.4$  Hz, 1H), 6.62–6.53 (m, 1H), 5.95 (ddd,  $J = 14.5, 9.3, 4.8$  Hz, 1H), 5.82 (s, 1H), 5.57 (t,  $J = 8.3$  Hz, 1H), 5.13 (d,  $J = 10.5$  Hz, 1H), 5.05 (t,  $J = 9.8$  Hz, 1H), 5.01 (d,  $J = 10.3$  Hz, 1H), 4.74–4.66 (m, 4H), 4.63–4.56 (m, 4H), 4.42 (d,  $J = 11.5$  Hz, 1H), 4.24–4.21 (m, br, 1H), 4.17–3.98 (m, 5H), 3.92 (d,  $J = 3.3$  Hz, 1H), 3.75–3.66 (m, 3H), 3.56 (s, 3H), 3.54 (d,  $J = 3.5$  Hz, 1H), 3.53–3.46 (m, 1H), 3.11–3.02 (m, 6H), 2.96–2.89 (m, 4H), 2.83 (sept,  $J = 6.8$  Hz, 2H), 2.76–2.65 (m, 7H), 2.59 (quint,  $J = 7.0$  Hz, 1H), 2.52–2.32 (m, 6H), 2.23–2.11 (m, 4H), 1.99 (d,  $J = 12.3$  Hz, 5H), 1.81 (s, 3H), 1.75 (s, 3H), 1.65 (s, 3H), 1.70–1.58 (m, 4H), 1.35 (d,  $J = 6.2$  Hz, 3H), 1.31–1.22 (m, 1H), 1.20–1.10 (m, 18H), 0.87 (d,  $J =$

7.2 Hz, 3H);  $^{13}\text{C}$  NMR (126 MHz,  $\text{CD}_3\text{OD}$ )  $\delta$  178.4, 169.1, 167.1, 154.4, 146.8, 146.2, 145.5, 143.8, 140.7, 136.9, 136.4, 134.6, 128.7, 128.4, 126.8, 126.3, 125.6, 124.6, 123.9, 122.3, 102.1, 97.2, 94.3, 82.7, 78.6, 77.3, 75.9, 74.6, 73.5, 73.2, 73.0, 72.8, 71.4, 71.39, 71.35, 70.5, 68.2, 63.9, 62.3, 58.6, 58.5, 52.5, 48.3, 48.2, 42.5, 37.3, 35.4, 31.8, 31.6, 30.7, 28.7, 28.4, 26.9, 26.0, 24.05, 24.01, 20.3, 19.5, 19.1, 18.7, 18.4, 17.5, 15.4, 14.5, 13.9, 11.3 ppm; HRMS ESI+ (MeOH), calculated for  $\text{C}_{76}\text{H}_{118}\text{Cl}_2\text{N}_{10}\text{O}_{18}$   $[\text{M}+2\text{H}]^{2+}$ : 764.39959, found: 764.39950.

### Bromoacetylciprofloxacin (14)

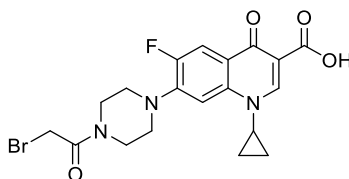

Chemical Formula:  $\text{C}_{19}\text{H}_{19}\text{BrFN}_3\text{O}_4$

Exact Mass: 451.0543

Molecular Weight: 452.2804

In a flame-dried flask, ciprofloxacin (250 mg, 0.754 mmol, 1.0 equiv.) was dissolved in dry THF (0.5 mL). Dry pyridine (61  $\mu\text{L}$ , 0.75 mmol, 1.0 equiv.) and bromoacetyl bromide (65  $\mu\text{L}$ , 0.75 mmol, 1.0 equiv.) were added. The orange mixture was stirred at room temperature for 18 hours. Upon addition of ice to the reaction mixture, the product precipitated. The yellow solid was filtered and washed with  $\text{H}_2\text{O}$  (3x). The filtrate was extracted with  $\text{CH}_2\text{Cl}_2$  (3x) and dried over anhydrous  $\text{MgSO}_4$ . After filtration of the drying agent, the solvent was evaporated under reduced pressure. The two portions of the crude product, *i.e.* the yellow material obtained by filtration and by extraction with  $\text{CH}_2\text{Cl}_2$ , were combined and purified by flash column chromatography ( $\text{SiO}_2$ ,  $\text{CH}_2\text{Cl}_2/\text{MeOH}$  95:5) to afford bromoacetylciprofloxacin **14** as a yellow solid (186 mg, 0.411 mmol, 55 %).

$R_f$  ( $\text{CH}_2\text{Cl}_2/\text{MeOH}$  95:5) = 0.22; FT-IR (film)  $\tilde{\nu}$  = 1742, 1731, 1652, 1624, 1533, 1495, 1452, 1380, 1339, 1299, 1272, 1250, 1213, 1140, 1105, 1089, 1051, 1024, 976, 954, 917, 885, 848, 831, 804, 779, 745, 715, 703, 666, 638, 623, 612, 552, 528, 496, 474  $\text{cm}^{-1}$ ;  $^1\text{H}$  NMR (500 MHz,  $\text{CDCl}_3$ )  $\delta$  14.86 (s, 1H), 8.80 (s, 1H), 8.09 (d,  $J$  = 12.8 Hz, 1H), 7.39 (d,  $J$  = 7.0 Hz, 1H), 3.93 (s, 2H), 3.91–3.87 (m, 2H), 3.72–3.67 (m, 2H), 3.54 (tt,  $J$  = 7.3, 4.0 Hz, 1H), 3.45–3.40 (m, 2H), 3.35–3.30 (m, 2H), 1.44–1.38 (m, 2H), 1.24–1.20 (m, 2H) ppm;  $^{13}\text{C}$  NMR (126 MHz,  $\text{CDCl}_3$ )  $\delta$  177.3 (d,  $^4J_{\text{C-F}}$  = 2.6 Hz), 167.0, 165.5, 153.8 (d,  $^1J_{\text{C-F}}$  = 251.2 Hz), 147.9, 145.3 (d,  $^2J_{\text{C-F}}$  = 10.7 Hz), 139.1, 120.9 (d,  $^3J_{\text{C-F}}$  = 8.1 Hz), 113.1 (d,  $^2J_{\text{C-F}}$  = 23.3 Hz), 108.6, 105.4 (d,  $^3J_{\text{C-F}}$  = 2.7 Hz), 50.1 (d,  $^4J_{\text{C-F}}$  = 5.7 Hz), 49.4 (d,  $^4J_{\text{C-F}}$  = 3.1 Hz), 46.7, 41.8, 35.5, 25.6, 8.5 ppm;  $^{19}\text{F}$  NMR (376 MHz,  $\text{CDCl}_3$ )  $\delta$  -121.32 (dd,  $J$  = 12.7, 7.1 Hz) ppm; HRMS ESI+ (MeOH) calculated for  $\text{C}_{19}\text{H}_{20}\text{BrFN}_3\text{O}_4$   $[\text{M}+\text{H}]^+$ : 452.06157, found: 452.06162.

## Fidaxomicin-Ciprofloxacin Hybrid (15)

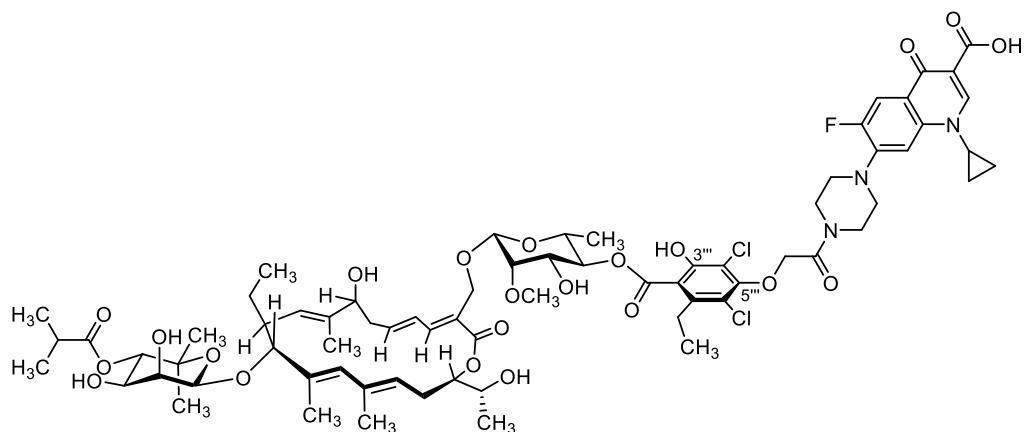

**15a**

Chemical Formula:  $C_{71}H_{92}Cl_2FN_3O_{22}$

Exact Mass: 1427.5534

Molecular Weight: 1429.4144

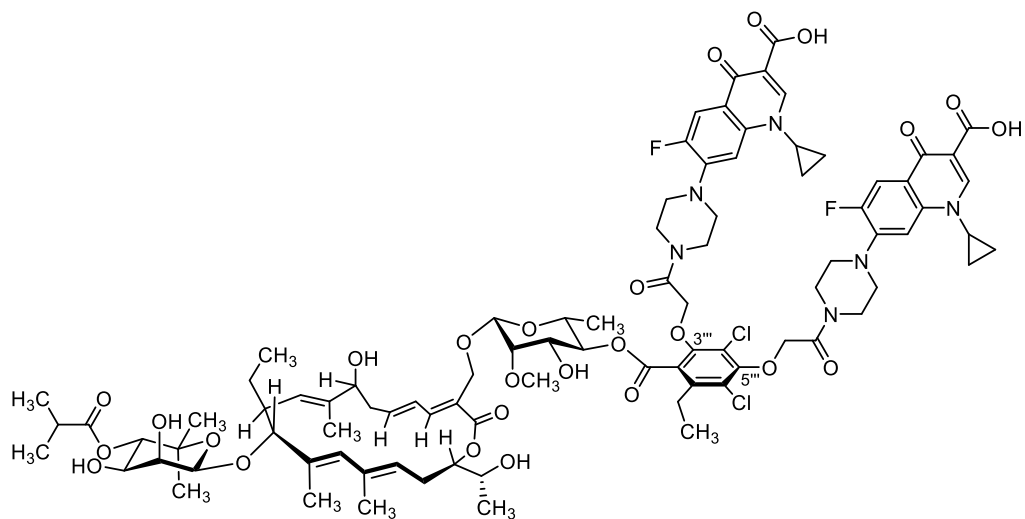

**15b**

Chemical Formula:  $C_{90}H_{110}Cl_2F_2N_6O_{26}$

Exact Mass: 1798.6815

Molecular Weight: 1800.7828

An oven-dried 5 mL flask was charged with fidaxomicin (**1**, 20.0 mg, 18.9  $\mu\text{mol}$ , 1.0 equiv.),  $\text{K}_2\text{CO}_3$  (10.4 mg, 75.6  $\mu\text{mol}$ , 4.0 equiv.) and bromoacetyl ciprofloxacin (**14**, 11.1 mg, 24.6  $\mu\text{mol}$ , 1.3 equiv.) under an atmosphere of argon. The solids were dissolved in dry DMF (0.8 mL). The milky yellow mixture was stirred at 45 °C for 4 hours. The reaction mixture was filtered over Celite and washed with MeOH/MeCN (1:1). The crude product was purified by RP-HPLC [Gemini NX C18, 5  $\mu$ , 110 Å, 250 mm x 21.2 mm, solvent A:  $\text{H}_2\text{O}+0.1\%$  HCOOH, solvent B: MeCN+0.1 % HCOOH; 20 mL/min; LC time program (min – % B): 0.0 min – 5 %, 10.0 min – 5 %, 12 min – 60 %, 60 min – 70 %) to afford the two products as colourless solids after lyophilization (**15a**:  $t_{\text{R}} = 24.1$  min, 10.0 mg, 7.00  $\mu\text{mol}$ , 37 %; **15b**:  $t_{\text{R}} = 25.6$  min, 6.60 mg, 3.67  $\mu\text{mol}$ , 20 %).

### **15a**

**Specific Rotation**  $[\alpha]_{\text{D}}^{23\text{C}} = -5.3$  ( $\beta = 0.19$  g/100 mL, MeOH); **FT-IR** (film)  $\tilde{\nu} = 3433, 2974, 2934, 1725, 1627, 1470, 1385, 1302, 1257, 1213, 1146, 1070, 1029, 896, 745$   $\text{cm}^{-1}$ ; **<sup>1</sup>H NMR** (500 MHz, acetone- $d_6$ )  $\delta$  14.93 (s, 1H), 8.73 (s, 1H), 7.96 (d,  $J = 13.2$  Hz, 1H), 7.78 (d,  $J = 7.3$  Hz, 1H), 7.23 (d,  $J = 11.3$  Hz, 1H), 6.67–6.59 (m, 1H), 5.96 (ddd,  $J = 14.6, 9.5, 4.6$  Hz, 1H), 5.83 (s, 1H), 5.62 (t,  $J = 8.3$  Hz, 1H), 5.21 (dt,  $J = 10.6, 1.6$  Hz, 1H), 5.06 (t,  $J = 9.7$  Hz, 1H), 4.99 (d,  $J = 10.1$  Hz, 1H), 4.83 (s, 1H), 4.77 (d,  $J = 1.3$  Hz, 1H), 4.73 (dt,  $J = 6.5, 5.0$  Hz, 1H), 4.66 (d,  $J = 0.8$  Hz, 1H), 4.60 (d,  $J = 11.5$  Hz, 1H), 4.41 (d,  $J = 11.4$  Hz, 1H), 4.27 (s, br, 1H), 4.06–3.97 (m, 3H), 3.95 (d,  $J = 2.7$  Hz, 1H), 3.94–3.82 (m, 4H), 3.75 (dd,  $J = 9.9, 3.3$  Hz, 1H), 3.78–3.70 (m, 3H), 3.61–3.55 (m, 2H), 3.55–3.49 (m, 2H), 3.52 (s, 3H), 3.49–3.42 (m, 2H), 2.96–2.80 (m, 2H), 2.78–2.60 (m, 3H), 2.56 (sept,  $J = 7.0$  Hz, 1H), 2.53–2.40 (m, 2H), 1.99–1.89 (m, 1H), 1.81 (d,  $J = 1.4$  Hz, 3H), 1.73–1.72 (m, 3H), 1.65 (dd,  $J = 1.3, 0.6$  Hz, 3H), 1.50–1.45 (m, 2H), 1.35–1.31 (m, 5H), 1.21–1.12 (m, 15H), 1.09 (s, 3H), 0.82 (t,  $J = 7.3$  Hz, 3H) ppm; **<sup>13</sup>C NMR** (126 MHz, acetone- $d_6$ )  $\delta$  178.0 (d,  $^4J_{\text{C-F}} = 2.6$  Hz), 176.8, 167.8, 167.6, 166.7, 165.8, 154.5 (d,  $^1J_{\text{C-F}} = 249.2$  Hz), 154.3, 153.0, 149.0, 146.3 (d,  $^2J_{\text{C-F}} = 10.4$  Hz), 145.4, 143.4, 141.4, 140.4, 136.9, 136.13, 136.10, 133.8, 128.2, 126.4, 125.3, 124.0, 120.8 (d,  $^3J_{\text{C-F}} = 7.1$  Hz), 118.8, 115.8, 112.2 (d,  $^2J_{\text{C-F}} = 23.4$  Hz), 108.7, 107.6 (d,  $^3J_{\text{C-F}} = 3.2$  Hz), 101.9, 96.8, 93.3, 81.6, 78.2, 77.6, 75.7, 73.8, 72.9, 72.8, 72.4 (two peaks), 70.6, 70.2, 67.7, 63.4, 61.7, 51.1, 50.4, 45.9, 42.2, 42.0, 37.3, 36.6, 34.8, 28.7, 28.4, 26.5, 25.9, 20.7, 19.4, 19.2, 18.6, 18.1, 17.5, 15.2, 14.5, 13.8, 11.2, 8.5 ppm; **HRMS** ESI– (MeOH), calculated for  $\text{C}_{71}\text{H}_{91}\text{Cl}_2\text{FN}_3\text{O}_{22}$   $[\text{M-H}]^-$ : 1426.54608, found: 1426.54661.

### **15b**

**FT-IR** (film)  $\tilde{\nu} = 3456, 2976, 2934, 1728, 1628, 1493, 1467, 1403, 1386, 1336, 1302, 1257, 1113, 1069, 1028, 1007, 889, 834$   $\text{cm}^{-1}$ ; **<sup>1</sup>H NMR** (500 MHz, acetone- $d_6$ )  $\delta$  14.91 (s, 1H), 14.90 (s, 1H), 8.72 (s, 2H), 7.95 (d,  $J = 13.1$  Hz, 2H), 7.85–7.68 (m, 2H), 7.22 (d,  $J = 11.4$  Hz, 1H), 6.60 (dd,  $J = 14.8, 11.7$  Hz, 1H), 5.95 (ddd,  $J = 14.6, 9.6, 4.5$  Hz, 1H), 5.81 (s, 1H), 5.61 (t,  $J = 8.0$  Hz, 1H), 5.21 (d,  $J = 10.6$  Hz, 1H), 5.03 (t,  $J = 9.7$  Hz, 1H), 4.99 (d,  $J = 10.2$  Hz, 1H), 4.88 (s, 2H), 4.87 (s, 2H), 4.76 (s, 1H), 4.70 (q,  $J = 5.4$  Hz, 1H), 4.60 (s, 1H), 4.56 (d,  $J = 11.5$  Hz, 1H), 4.38 (d,  $J = 11.5$  Hz, 1H), 4.27 (s, br, 1H), 4.11–3.67 (m, 15H), 3.61–3.51 (m, 6H), 3.51 (s, 3H), 3.51–3.41 (m, 4H), 2.91–2.80 (m, 2H), 2.74–2.60 (m, 3H), 2.56 (sept,  $J = 7.0$  Hz, 1H), 2.50 (ddd,  $J = 14.7, 10.6, 5.3$  Hz, 1H), 2.41 (ddd,  $J = 13.8, 9.2, 4.5$  Hz, 1H), 1.96–1.90 (m, 1H), 1.80 (s, 3H), 1.71 (s, 3H), 1.64 (s, 3H), 1.51–1.44 (m, 4H), 1.36–1.30 (m, 4H), 1.34 (d,  $J = 6.2$  Hz, 3H), 1.29–1.23 (m, 1H), 1.21–1.11 (m, 12H), 1.19 (t,  $J = 7.3$  Hz, 3H), 1.08 (s, 3H), 0.82 (t,



$J = 7.4$  Hz, 3H) ppm;  **$^{13}\text{C}$  NMR** (126 MHz, acetone- $d_6$ )  $\delta$  177.97–177.91, 176.8, 167.8, 166.70, 166.65, 166.2, 165.9, 165.7, 154.3 (d,  $^1J_{\text{C-F}} = 249.2$  Hz), 153.8, 151.7, 149.0, 146.3 (d,  $^2J_{\text{C-F}} = 10.8$  Hz), 145.6, 143.6, 140.5, 140.4, 136.8, 136.1, 133.7, 128.6, 128.0, 126.3, 126.2, 125.1, 124.0, 122.0, 120.8 (d,  $^3J_{\text{C-F}} = 7.2$  Hz), 112.23 (d,  $^2J_{\text{C-F}} = 23.0$  Hz), 112.21 (d,  $^2J_{\text{C-F}} = 23.1$  Hz), 108.6, 107.61, 107.56, 101.5, 96.7, 93.2, 81.9, 78.2, 77.9, 75.7, 73.8, 73.2, 72.9, 72.8, 72.5, 72.4, 70.8, 70.1, 67.7, 63.2, 61.7, 51.0, 50.4, 45.9, 45.5, 42.24, 42.16, 42.0, 37.4, 36.62, 36.59, 34.8, 28.7, 28.3, 26.5, 25.7, 20.7, 19.4, 19.2, 18.7, 18.6, 17.5, 15.2, 14.4, 13.8, 11.2, 8.54, 8.50 ppm; **HRMS** ESI+ (MeOH), calculated for  $\text{C}_{90}\text{H}_{112}\text{Cl}_2\text{F}_2\text{N}_6\text{O}_{26}$   $[\text{M}+2\text{H}]^{2+}$ : 900.34802, found: 900.34890.

### 23-Azido-3,6,9,12,15,18,21-heptaooxatricosyl 4-Nitrobenzenesulfonate (**16**)

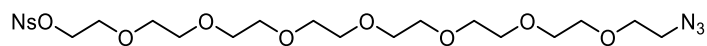

Chemical Formula: C<sub>22</sub>H<sub>36</sub>N<sub>4</sub>O<sub>12</sub>S

Exact Mass: 580.2050

Molecular Weight: 580.6060

In a flame-dried 10 mL Schlenk tube, O-(2-azidoethyl)heptaethylene glycol (215 mg, 0.545 mmol, 1.0 equiv.) was dissolved in dry CH<sub>2</sub>Cl<sub>2</sub> (2.0 mL). Et<sub>3</sub>N (150 μL, 109 mg, 1.08 mmol, 2.0 equiv.) and DMAP (15.0 mg, 0.122 mmol, 0.23 equiv.) were added and the flask was cooled in an ice bath. Nosyl chloride (241 mg, 1.08 mmol, 2.0 equiv.) in CH<sub>2</sub>Cl<sub>2</sub> (1.0 mL) was added by syringe together with another portion of CH<sub>2</sub>Cl<sub>2</sub> (1.0 mL). The reaction mixture was stirred at 0 °C for five minutes and then allowed to warm to room temperature. After stirring at room temperature for 22 hours, the reaction mixture was poured on a saturated aqueous solution of NH<sub>4</sub>Cl (20 mL) and the phases were separated. The aqueous phase was extracted with CH<sub>2</sub>Cl<sub>2</sub> (3 x 15 mL). The combined organic phases were dried over anhydrous MgSO<sub>4</sub>. After filtration of the drying agent and evaporation of the solvent, the crude product **16** was purified by preparative RP-HPLC [Gemini NX C18, 10 μ, 110 Å, 250 mm x 21.2 mm; solvent A: H<sub>2</sub>O+0.1 % HCOOH, solvent B: MeCN+0.1 % HCOOH; 20 mL/min; LC time program (min – % B): 4.0 min – 45 %, 36.0 min – 80 %, 46.0 min – 100 %; λ = 270 nm] to afford the desired product **16** (t<sub>R</sub> = 12.2 min, 168 mg, 0.289 mmol, 53 %) after lyophilization.

**FT-IR** (film)  $\tilde{\nu}$  = 2869, 2101 (N<sub>3</sub>), 1609, 1531, 1452, 1403, 1350, 1307, 1291, 1250, 1185, 1094, 1034, 1007, 921, 855, 788, 746, 734, 685, 638, 614, 577, 556, 504, 464 cm<sup>-1</sup>; **<sup>1</sup>H NMR** (500.30 MHz, CDCl<sub>3</sub>) δ 8.40 (d, *J* = 8.6 Hz, 2H), 8.14 (d, *J* = 8.6 Hz, 2H), 4.30 (t, *J* = 4.5 Hz, 2H), 3.71 (t, *J* = 4.6 Hz, 2H), 3.69–3.58 (m, 26H), 3.39 (t, *J* = 5.1 Hz, 2H) ppm; **<sup>13</sup>C NMR** (125.81 MHz, CDCl<sub>3</sub>) δ = 150.9, 142.1, 129.5, 124.5, 70.87, 70.85, 70.81, 70.77, 70.72, 70.70, 70.67, 70.2, 68.7, 50.9 ppm; **HRMS** ESI<sup>+</sup> (MeOH) calculated for C<sub>22</sub>H<sub>40</sub>N<sub>5</sub>O<sub>12</sub>S [M+NH<sub>4</sub>]<sup>+</sup>: 598.23887, found: 598.23907.

## Fiadxomicin-OEG-Azide (17)

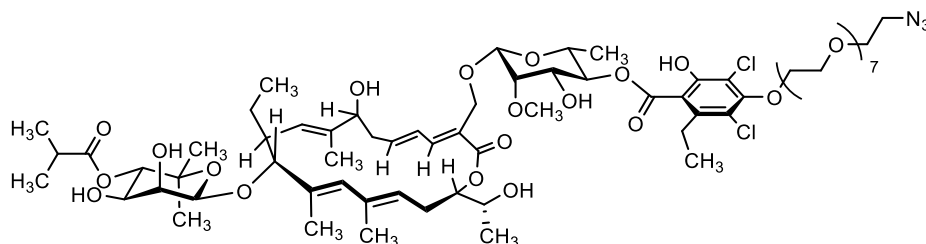

Chemical Formula: C<sub>68</sub>H<sub>105</sub>Cl<sub>2</sub>N<sub>3</sub>O<sub>25</sub>

Exact Mass: 1433.6414

Molecular Weight: 1435.4840

A flame-dried Schlenk tube under an atmosphere of argon was charged with fidaxomicin (**1**, 84.0 mg, 79.4  $\mu$ mol, 1.0 equiv.) and a solution of 23-azido-3,6,9,12,15,18,21-hepta-oxatricosyl 4-nitrobenzenesulfonate (**16**, 68.6 mg, 0.118 mmol, 1.5 equiv.) in dry DMF (1 mL) was added by microliter syringe. K<sub>2</sub>CO<sub>3</sub> (44.5 mg, 0.322 mmol, 4.1 equiv.) was added and washed down with dry DMF (1.0 mL). The reaction mixture was stirred for 21.75 hours at 45 °C. The reaction mixture was diluted with EtOAc (15 mL) and quenched with a saturated aqueous solution of NH<sub>4</sub>Cl (15 mL). The layers were separated and the aqueous phase extracted with EtOAc (2 x 15 mL). The combined organic phases were dried over anhydrous MgSO<sub>4</sub>. After filtration of the drying agent, the solvent was evaporated under reduced pressure. The crude product was subjected to preparative HPLC [Gemini NX C18, 5  $\mu$ , 110 Å, 250 mm x 21.2 mm; solvent A: H<sub>2</sub>O+0.1 % HCOOH, solvent B: MeCN+0.1 % HCOOH; 20 mL/min; LC time program (min – % B): 4.0 min – 60 %, 35.0 min – 85 %, 45.1 min – 100 %;  $\lambda$  = 270 nm] to afford the desired product **17** as a red solid after lyophilization ( $t_R$  = 17.6 min, 39.9 mg, 0.289 mmol, 35 %).

**Specific Rotation**  $[\alpha]_D^{22^\circ C} = -42.9$  ( $\beta = 0.92$  g/100 mL, CHCl<sub>3</sub>); **FT-IR** (neat)  $\tilde{\nu} = 3455, 2972, 2932, 2875, 2104$  (N<sub>3</sub>), 1736, 1702, 1643, 1581, 1455, 1415, 1384, 1369, 1348, 1298, 1244, 1199, 1107, 1094, 1070, 1027, 949, 903, 860, 800, 769, 744 cm<sup>-1</sup>; **<sup>1</sup>H NMR** (500 MHz, acetone-*d*<sub>6</sub>)  $\delta$  7.23 (d,  $J = 11.4$  Hz, 1H), 6.69–6.56 (m, 1H), 5.96 (ddd,  $J = 14.7, 9.5, 4.6$  Hz, 1H), 5.83 (s, 1H), 5.63 (t,  $J = 8.2$  Hz, 1H), 5.25–5.18 (m, 1H), 5.07 (t,  $J = 9.7$  Hz, 1H), 4.99 (d,  $J = 10.1$  Hz, 1H), 4.77 (d,  $J = 1.2$  Hz, 1H), 4.73 (q,  $J = 5.2$  Hz, 1H), 4.67 (d,  $J = 0.8$  Hz, 1H), 4.60 (d,  $J = 11.4$  Hz, 1H), 4.41 (d,  $J = 11.5$  Hz, 1H), 4.27 (s, 1H), 4.26–4.20 (m, 2H), 4.08–3.93 (m, 2H), 3.88 (dd,  $J = 5.6, 4.2$  Hz, 2H), 3.82–3.55 (m, 31H), 3.52 (s, 3H), 3.39 (t,  $J = 5.0$  Hz, 2H), 3.25 (d,  $J = 9.4$  Hz, 1H), 3.03–2.60 (m, 5H), 2.56 (sept,  $J = 7.0$  Hz, 1H), 2.53–2.39 (m, 2H), 1.99–1.88 (m, 1H), 1.81 (d,  $J = 1.3$  Hz, 3H), 1.73 (s, 3H), 1.66 (d,  $J = 1.2$  Hz, 3H), 1.33 (d,  $J = 6.2$  Hz, 3H), 1.30–1.24 (m, 1H), 1.24–1.11 (m, 15H), 1.09 (s, 3H), 0.83 (t,  $J = 7.4$  Hz, 3H) ppm; **<sup>13</sup>C NMR** (126 MHz, acetone-*d*<sub>6</sub>)  $\delta$  176.8, 168.0, 167.8, 155.1, 153.8, 145.4, 143.4, 141.1, 136.9, 136.12, 136.11, 133.8, 128.2, 126.4, 125.3, 124.0, 118.2, 116.0, 101.8, 96.8, 93.3, 81.6, 78.2, 77.5, 75.7, 73.8, 73.7, 72.9, 72.4, 71.4, 71.32, 71.30, 71.28, 71.26, 71.24, 71.20, 70.9, 70.7, 70.6, 70.1, 67.7, 63.4, 61.7, 51.4, 42.0, 37.3, 34.8, 28.7, 28.4, 26.5, 25.9, 20.7, 19.4, 19.2, 18.6, 18.2, 17.5, 15.6, 15.2, 14.6, 13.8, 11.2 ppm; **HRMS** ESI(+) (MeOH) calculated for C<sub>68</sub>H<sub>113</sub>Cl<sub>2</sub>N<sub>5</sub>O<sub>25</sub> [M+2NH<sub>4</sub>]<sup>2+</sup>: 734.85454, found: 734.85350.

## 1-Nitrosopiperazine

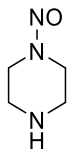

Chemical Formula: C<sub>4</sub>H<sub>9</sub>N<sub>3</sub>O

Exact Mass: 115.0746

Molecular Weight: 115.1360

1-Nitrosopiperazine was synthesized following a literature procedure.<sup>10</sup> In a flame-dried 500 mL round-bottom flask piperazine (10.3 g, 120 mmol, 1.0 equiv.) was dissolved in 6 M aqueous HCl (72 mL) and cooled to -10 °C. A solution of NaNO<sub>2</sub> (8.26 g, 120 mmol, 1.0 equiv.) in H<sub>2</sub>O (144 mL) was added dropwise by dropping funnel over 1 hour. After completion of the addition, the reaction mixture was adjusted to pH = 10 with 3 M NaOH (80 mL) and extracted with CHCl<sub>3</sub> (5 x 75 mL). The combined organic phases were dried over anhydrous MgSO<sub>4</sub>, filtered and concentrated *in vacuo*. After purification by flash column chromatography (SiO<sub>2</sub>, CH<sub>2</sub>Cl<sub>2</sub>/MeOH 92:8), the product (4.05 g, 35.6 mmol, 29 %) was obtained as a yellowish oil.

**R<sub>f</sub>** (CH<sub>2</sub>Cl<sub>2</sub>/MeOH 92:8) = 0.24; **FT-IR** (neat)  $\tilde{\nu}$  = 3315, 2957, 2925, 2828, 1651, 1448, 1418, 1347, 1314, 1279, 1208, 1173, 1137, 1100, 995, 894, 795, 670, 572, 476 cm<sup>-1</sup>; **<sup>1</sup>H NMR** (400 MHz, CDCl<sub>3</sub>)  $\delta$  4.26–4.19 (m, 2H), 3.86–3.79 (m, 2H), 3.10–3.04 (m, 2H), 2.86–2.79 (m, 2H) ppm; **<sup>13</sup>C NMR** (100 MHz, CDCl<sub>3</sub>)  $\delta$  50.8, 46.3, 44.7, 40.6 ppm; **HRMS** ESI(+) (MeOH) calculated for C<sub>4</sub>H<sub>10</sub>N<sub>3</sub>O [M+H]<sup>+</sup>: 116.0818, found: 116.0819.

## 1-Nitroso-4-propargylpiperazine

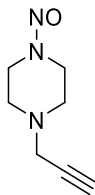

Chemical Formula: C<sub>7</sub>H<sub>11</sub>N<sub>3</sub>O

Exact Mass: 153.0902

Molecular Weight: 153.1850

1-Nitroso-4-propargylpiperazine was synthesized following a literature procedure.<sup>10</sup> In a flame-dried 50 mL round-bottom flask, 1-nitrosopiperazine (1.53 g, 13.3 mmol, 1.0 equiv.) was dissolved in dry MeCN (36 mL). Propargyl bromide (1.45 mL, 13.3 mmol, 1.0 equiv.) and Et<sub>3</sub>N (3.70 mL, 26.6 mmol, 2.0 equiv.) were added and the reaction mixture was heated under reflux conditions. Reaction control after 5 hours by TLC indicated only sluggish conversion. Therefore, another portion of propargyl bromide (400 mg, 2.68 mmol, 0.2 equiv.) was added and the reaction mixture was stirred for 16 hours under reflux conditions. The reaction mixture was concentrated *in vacuo*, dissolved in 10 % aqueous NaOH (100 mL) and extracted with CH<sub>2</sub>Cl<sub>2</sub> (3 x 40 mL). The combined organic phases were dried over anhydrous MgSO<sub>4</sub>, filtered and concentrated *in vacuo*. After purification by flash column chromatography (SiO<sub>2</sub>, CH<sub>2</sub>Cl<sub>2</sub>/MeOH 96:4) the product (1.34 g, 8.74 mmol, 66 %) was obtained as a beige solid.

**R<sub>f</sub>** (CH<sub>2</sub>Cl<sub>2</sub>/MeOH 96:4) = 0.5; **<sup>1</sup>H NMR** (400 MHz, CDCl<sub>3</sub>) δ 4.33–4.28 (m, 2H), 3.91–3.85 (m, 2H), 3.40 (d, *J* = 2.4 Hz, 2H), 2.82–2.76 (m, 2H), 2.57–2.51 (m, 2H), 2.28 (t, *J* = 2.4 Hz, 1H) ppm; **<sup>13</sup>C NMR** (101 MHz, CDCl<sub>3</sub>) δ 77.8, 74.1, 52.0, 50.5, 49.6, 46.8, 39.3 ppm; **HRMS** ESI+ (MeOH) calculated for C<sub>7</sub>H<sub>12</sub>N<sub>3</sub>O [M+H]<sup>+</sup>: 154.0974, found: 154.0976.

## 1-Amino-4-propargylpiperazine

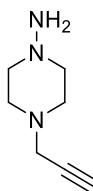

Chemical Formula: C<sub>7</sub>H<sub>13</sub>N<sub>3</sub>

Exact Mass: 139.1109

Molecular Weight: 139.2020

1-Amino-4-propargylpiperazine was synthesized following a modified literature procedure.<sup>10</sup> In a flame-dried 250 mL round-bottom flask, LiAlH<sub>4</sub> (228 mg, 6.01 mmol, 2.0 equiv.) was suspended in dry Et<sub>2</sub>O (80 mL) and was stirred vigorously. A solution of 1-nitroso-4-propargylpiperazine (460 mg, 3.00 mmol, 1.0 equiv.) in dry Et<sub>2</sub>O (20 mL) was added and the reaction mixture was stirred under reflux conditions for 3 hours. The reaction mixture was cooled to 0 °C and a saturated aqueous solution of sodium potassium tartrate (100 mL) was added slowly. After completion of the addition, the mixture was vigorously stirred for 3 hours, filtered and extracted with CH<sub>2</sub>Cl<sub>2</sub> (3 x 100 mL). The combined organic phases were dried over anhydrous MgSO<sub>4</sub>, filtered and concentrated *in vacuo*. After purification by flash column chromatography (SiO<sub>2</sub>, CH<sub>2</sub>Cl<sub>2</sub>/MeOH 10:1) the product (104 mg, 740 μmol, 25 %) was obtained as an colourless solid.

**R<sub>f</sub>** (CH<sub>2</sub>Cl<sub>2</sub>/MeOH 10:1) = 0.15; **<sup>1</sup>H NMR** (400 MHz, CDCl<sub>3</sub>) δ 3.28 (d, *J* = 2.5 Hz, 2H), 2.82–2.49 (m, 8 H), 2.24 (t, *J* = 2.4 Hz, 1H) ppm; **<sup>13</sup>C NMR** (101 MHz, CDCl<sub>3</sub>) δ = 78.7, 73.4, 59.3, 51.7, 46.5 ppm; **<sup>1</sup>H NMR** (500 MHz, CD<sub>3</sub>OD) δ 3.35 (d, *J* = 2.5 Hz, 2H, overlain by solvent signal), 3.00–2.40 (m, br, 8H), 2.73 (t, *J* = 2.5 Hz, 1H) ppm; **<sup>13</sup>C NMR** (126 MHz, CD<sub>3</sub>OD) δ = 79.0, 75.2, 58.7, 52.2 ppm; **HRMS** ESI(+) (MeOH) calculated for C<sub>7</sub>H<sub>14</sub>N<sub>3</sub> [M+H]<sup>+</sup>: 140.1182, found: 140.1182.

## Alkynylated Rifampicin (18)

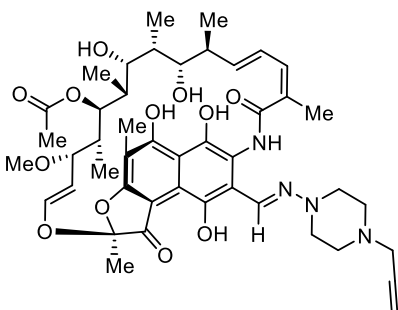

Chemical Formula: C<sub>45</sub>H<sub>58</sub>N<sub>4</sub>O<sub>12</sub>

Exact Mass: 846.4051

Molecular Weight: 846.9750

Alkynylated rifampicin was synthesized following a literature procedure.<sup>10</sup> In a flame-dried 5 mL Schlenk tube, 3-formylrifamycin SV (100 mg, 0.138 mmol, 1.0 equiv.) was dissolved in dry THF (2 mL) and 1-amino-4-propargylpiperazine (21.1 mg, 0.152 mmol, 1.1 equiv.) was added. Additional dry THF (2.0 mL) was added to the reaction mixture and it was stirred at room temperature for 15 minutes. The reaction mixture was diluted with CH<sub>2</sub>Cl<sub>2</sub> (10 mL), washed with a saturated aqueous solution of NaCl (2 x 10 mL) and the combined organic phases were dried over anhydrous MgSO<sub>4</sub>. After filtration of the drying agent and evaporation of the solvent, the product **18** (106 mg, 0.125 mmol, 91 %, containing slight impurities) was obtained as a bright red solid.

**UV/VIS** (MeCN, c = 2.5 x 10<sup>-5</sup> mol L<sup>-1</sup>, d = 1 cm) λ<sub>max</sub> [nm] (log ε [L mol<sup>-1</sup> cm<sup>-1</sup>]) = 478 (4.20), 338 (4.44), 238 (4.58), λ<sub>min</sub> [nm] (log ε [L mol<sup>-1</sup> cm<sup>-1</sup>]) = 396 (3.40), 292 (4.17), 214 (4.43); **FT-IR** (film)  $\tilde{\nu}$  = 3476, 3302, 2973, 2939, 2884, 2829, 2106, 1715, 1646, 1565, 1522, 1452, 1420, 1374, 1330, 1283, 1249, 1216, 1182, 1146, 1083, 1049, 1021, 1001, 972, 945, 898, 853, 803, 755, 735, 665, 524 cm<sup>-1</sup>; **<sup>1</sup>H NMR** (400 MHz, CDCl<sub>3</sub>) δ 13.52 (s, br, 1H), 13.24 (s, 1H), 13.21 (s, 1H), 12.02 (s, br, 1H), 8.29 (s, 1H), 6.63–6.52 (m, 1H), 6.39 (d, J = 11.0 Hz, 1H), 6.21 (d, J = 12.7 Hz, 1H), 5.94 (dd, J = 15.5 Hz, 5.0 Hz, 1H), 5.11 (dd, J = 12.6 Hz, 6.7 Hz, 1H), 4.94 (d, J = 10.5 Hz, 1H), 3.80–3.72 (m, 1H), 3.60 (d, J = 5.0 Hz, 1H), 3.48 (d, J = 6.8 Hz, 1H), 3.44 (s, 1H), 3.37 (d, J = 2.4 Hz, 2H), 3.25–3.15 (m, 2H), 3.14–3.06 (m, 2H), 3.04 (s, 3H), 3.04–2.99 (m, 1H), 2.80–2.65 (m, 4H), 2.43–2.32 (m, 1 H), 2.28 (t, J = 2.3 Hz, 1H), 2.23 (s, 3H), 2.08 (s, 3H), 2.06 (s, 3H), 1.80 (s, 3H), 1.76–1.66 (m, 1H), 1.61–1.50 (m, 1H), 1.41–1.31 (m, 1H), 1.02 (d, J = 7.0 Hz, 3H), 0.89 (d, J = 7.0 Hz, 3H), 0.60 (d, J = 6.8 Hz, 3H), -0.30 (d, J = 6.9 Hz, 3H); **<sup>13</sup>C NMR** (126 MHz, CDCl<sub>3</sub>) δ 195.7, 174.7, 172.3, 169.8, 169.4, 148.2, 142.94, 142.88, 138.7, 135.3, 134.7, 129.5, 123.3, 120.7, 118.8, 118.1, 113.1, 111.0, 109.0, 106.3, 104.8, 78.2, 77.0, 76.9, 74.6, 73.8, 70.7, 57.2, 50.7, 50.4, 46.8, 39.7, 38.7, 37.6, 33.5, 21.6, 20.9, 18.1, 11.0, 9.1, 8.6, 7.7 ppm; **HRMS** ESI+ (MeOH) calculated for C<sub>45</sub>H<sub>59</sub>N<sub>4</sub>O<sub>12</sub> [M+H]<sup>+</sup>: 847.41240, found: 847.41231.

## Fidaxomicin-Rifampicin Hybrid (19)

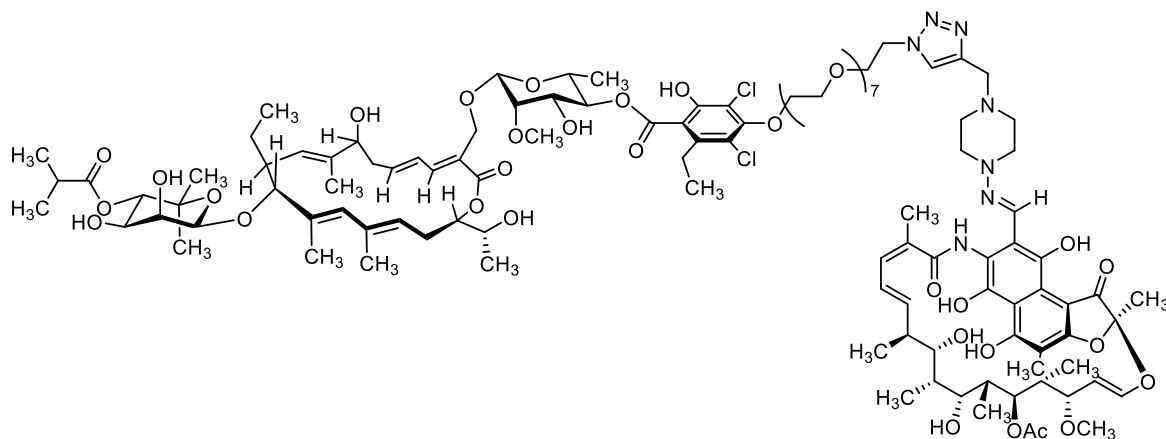

Chemical Formula:  $C_{113}H_{163}Cl_2N_7O_{37}$

Exact Mass: 2280.0465

Molecular Weight: 2282.4590

A 10 mL flask containing fidaxomicin-OEG-azide (**16**, 20.9 mg, 14.6  $\mu\text{mol}$ , 1.0 equiv.) was charged with rifampicin alkyne (**17**, 14.8 mg, 17.5  $\mu\text{mol}$ , 1.2 equiv.) and the flask was evacuated and flushed with argon several times. The solids were dissolved in dry  $\text{CH}_2\text{Cl}_2$  (0.7 mL). The CuAAC dicopper catalyst of Straub *et al.*<sup>9</sup> was added as a solid (2.4 mg, 3.4  $\mu\text{mol}$ , 0.23 equiv.) and washed down with another portion of dry  $\text{CH}_2\text{Cl}_2$  (0.1 mL). After 2.5 hours, another portion of dicopper catalyst (3.4 mg, 4.8  $\mu\text{mol}$ , 0.33 equiv.) was added. After 3 hours, the reaction mixture was diluted with  $\text{CH}_2\text{Cl}_2$  (5.0 mL) and poured on a saturated aqueous solution of  $\text{NH}_4\text{Cl}$  (5.0 mL). The phases were separated and the aqueous phase was extracted with  $\text{CH}_2\text{Cl}_2$  (3 x 5.0 mL). The combined organic phases were dried over anhydrous  $\text{MgSO}_4$ . After filtration of the drying agent and evaporation of the solvent, the crude product was purified by preparative RP-HPLC [*Phenomenex Synergi Hydro-RP*, 10  $\mu$ , 80  $\text{\AA}$ , 250 mm x 21.2 mm, solvent A:  $\text{H}_2\text{O}+0.1\%$   $\text{HCOOH}$ , solvent B:  $\text{MeCN}+0.1\%$   $\text{HCOOH}$ ; 20 mL/min; LC time program (min – % B): 0.0 min – 55 %, 4.00 – 55 %, 44.0 min – 70 %, 50.0 min – 85 %, 50.1 min – 100 %) to yield the bright red solid product **18** after lyophilisation (8.6 mg, 3.8  $\mu\text{mol}$ , 26 %).

**UV/VIS** (MeCN,  $c = 1.8 \times 10^{-5} \text{ mol L}^{-1}$ ,  $d = 1 \text{ cm}$ )  $\lambda_{\text{max}}$  [nm] ( $\log \epsilon$  [ $\text{L mol}^{-1} \text{ cm}^{-1}$ ]) = 478 (4.26), 340 (4.52), 234 (4.95),  $\lambda_{\text{min}}$  [nm] ( $\log \epsilon$  [ $\text{L mol}^{-1} \text{ cm}^{-1}$ ]) = 398 (3.55), 306 (4.29); **FT-IR** (film)  $\tilde{\nu} = 3448, 2975, 2933, 2878, 1731, 1707, 1643, 1565, 1453, 1415, 1375, 1330, 1295, 1242, 1141, 1087, 1056, 1024, 997, 947, 900, 844, 801, 770, 724 \text{ cm}^{-1}$ ;  **$^1\text{H NMR}$**  (500 MHz, acetone- $d_6$ )  $\delta$  13.30 (s, br), 12.14 (s), 8.26 (s, 1H), 7.92 (s, 1H), 7.23 (d,  $J = 11.5 \text{ Hz}$ , 1H), 6.72–6.46 (m, 3H), 6.31 (dd,  $J = 12.8, 1.0 \text{ Hz}$ , 1H), 6.05–5.91 (m, 2H), 5.82 (s, 1H), 5.62 (t,  $J = 8.3 \text{ Hz}$ , 1H), 5.21 (dt,  $J = 10.4, 1.6 \text{ Hz}$ , 1H), 5.14–5.02 (m, 3H), 4.99 (d,  $J = 10.1 \text{ Hz}$ , 1H), 4.79–4.75 (m, 1H), 4.73 (m, 1H), 4.66 (s, 1H), 4.60 (d,  $J = 11.4 \text{ Hz}$ , 1H), 4.57 (t,  $J = 5.1 \text{ Hz}$ , 2H), 4.41 (d,  $J = 11.5 \text{ Hz}$ , 1H), 4.32–4.24 (m, 2H), 4.23 (t,  $J = 4.9 \text{ Hz}$ , 2H),



4.08–3.98 (m, 2H), 3.98–3.93 (m, 2H), 3.91 (t,  $J = 5.1$  Hz, 2H), 3.88 (t,  $J = 4.8$  Hz, 2H), 3.88–3.84 (m, 1H), 3.76 (dd,  $J = 9.9, 3.3$  Hz, 2H), 3.74–3.64 (m, 7H), 3.64–3.54 (m, 27H), 3.52 (s, 3H), 3.47 (d,  $J = 7.8$  Hz, 1H), 3.24–3.18 (m, 2H), 3.16–3.09 (m, 2H), 2.98 (s, 3H), 2.95–2.60 (m, 19H), 2.56 (sept,  $J = 7.0$  Hz, 1H), 2.53–2.48 (m, 1H), 2.44 (ddt,  $J = 18.7, 9.2, 4.5$  Hz, 1H), 2.36–2.29 (m, 1H), 2.19 (s, 3H), 2.08 (s, 3H), 2.01 (s, 3H), 1.99 (d,  $J = 3.3$  Hz, 2H), 1.80 (d,  $J = 1.3$  Hz, 3H), 1.77 (s, 3H), 1.75–1.68 (m, 4H), 1.65 (d,  $J = 1.3$  Hz, 3H), 1.53–1.44 (m, 1H), 1.33 (d,  $J = 6.1$  Hz, 3H), 1.30–1.12 (m, 19H), 1.09 (s, 3H), 0.99 (d,  $J = 7.0$  Hz, 3H), 0.93 (d,  $J = 7.1$  Hz, 3H), 0.82 (t,  $J = 7.4$  Hz, 3H), 0.63 (d,  $J = 7.0$  Hz, 3H), -0.32 (d,  $J = 6.8$  Hz, 3H) ppm;  $^{13}\text{C}$  NMR (151 MHz, acetone- $d_6$ )  $\delta$  176.8, 175.0, 171.1, 170.7, 167.81, 167.77, 162.3, 155.1, 153.0, 148.5, 145.4, 144.3, 144.0, 143.4, 141.2, 136.9, 136.1, 135.8, 134.2, 133.8, 128.1, 126.3, 125.3, 124.9, 124.3, 124.0, 121.1, 120.6, 118.6, 118.2, 115.9, 113.4, 110.9, 110.1, 101.8, 96.7, 93.3, 81.6, 78.2, 77.53, 77.45, 77.40, 77.3, 75.7, 74.6, 73.8, 73.7, 72.9, 72.8, 72.4, 71.7, 71.4, 71.29, 71.29, 71.26, 71.24, 71.23, 71.21, 71.17, 71.06, 70.9, 70.6, 70.2, 70.1, 67.7, 63.4, 61.7, 56.8, 53.5, 52.2, 51.1, 50.7, 42.0, 41.2, 40.0, 39.0, 37.3, 34.8, 34.2, 28.7, 28.3, 26.5, 25.9, 22.0, 20.8, 20.72, 20.69, 19.4, 19.2, 18.6, 18.3, 18.2, 17.5, 15.2, 14.5, 13.8, 11.2, 9.5, 9.2, 7.7 ppm; **HRMS** ESI(+) (MeOH) calculated for  $\text{C}_{113}\text{H}_{168}\text{Cl}_2\text{N}_8\text{O}_{37}$   $[\text{M}+\text{NH}_4+\text{H}]^{2+}$ : 1149.54382, found: 1149.54424.

## Homology Modeling, Molecular Docking, and Molecular Modeling

We used our in-house homology modeling suite TopModel<sup>11-13</sup> to build homology models of the *M. tuberculosis* RNA polymerases (RNAPs), based on the templates of RpoB from *T. thermophilus* (PDB ID: 1IW7) and RNAP from *E. coli* (PDB ID: 4KN7). We selected the ten best RNAP models of each organism with the highest differences in binding pocket RMSD for subsequent docking.

The structure of Fidaxomicin was built and energetically relaxed with Maestro<sup>14</sup> and subsequently docked into the respective ten homology models of the RNAPs using AutoDock3<sup>15</sup> as a docking engine with DrugScore potentials<sup>16</sup> for scoring as described in the given reference.<sup>17</sup> DrugScore is a knowledge-based scoring function that implicitly takes into account the influence of water in protein-ligand recognition.<sup>16</sup> Although considering explicit water molecules is possible with AutoDock,<sup>18</sup> usually structural waters from crystal structures are considered for this, which are lacking in our case of the homology model of RNAP. For defining the docking box, the fidaxomicin binding pocket as suggested in literature<sup>19</sup> was used and extended by up to 16 Å. The final binding mode model was chosen as the one with a low docking energy from the largest cluster of structurally similar binding modes, as previously described.<sup>20-22</sup> Additionally, the number of addressed residues, known to lead to Fidaxomicin resistance when mutated, was taken into account. As the binding mode in model 10 from the *E. coli* template (docking energy -19.9 kcal mol<sup>-1</sup>; 25% of all poses in the largest cluster) addressed the most relevant residues in RNAP, this binding mode was finally used to guide further syntheses.

To generate the Fidaxomicin-Rifampicin hybrid, we structurally aligned the X-ray crystal structure of Rifampicin-bound RNAP (PDB ID: 4KMU<sup>23</sup>) to our model 10 and modeled a linker between the predicted binding mode of Fidaxomicin and Rifampicin (Figure S1), applying preferred *gauche* conformations<sup>24</sup> for the torsions along the polyethylene glycol chain and taking into account an additional 1,2,3-triazol-4-yl-piperidyl linker.

The interaction diagram of Fidaxomicin was generated using PoseView<sup>25,26</sup> and modified manually to also include residues putatively interacting in a water-mediated manner.

## Supporting Figures and Tables

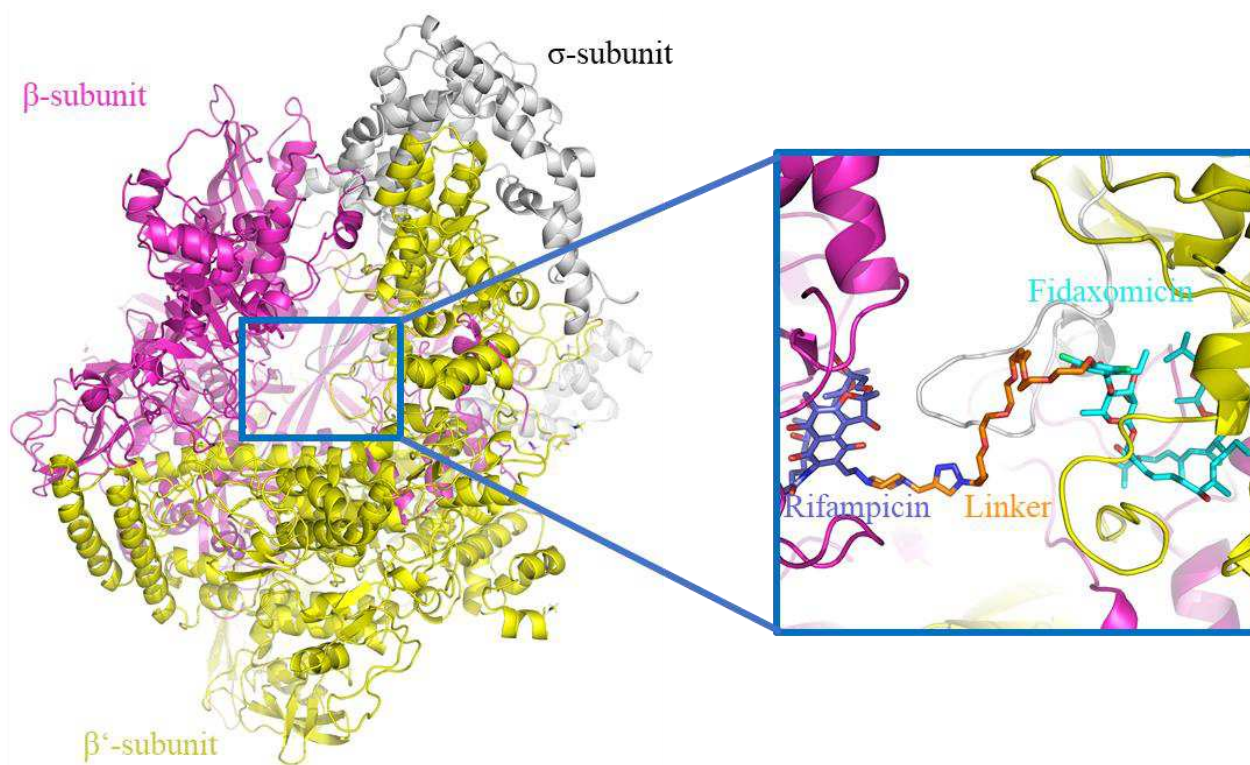

**Figure S1.** Binding mode prediction of the fidaxomicin(cyan)-rifampicin(navy)-hybrid in the homology model of *M. tuberculosis* RNAP (cartoon; white:  $\sigma$ -subunit; yellow:  $\beta'$ -subunit, magenta:  $\beta$ -subunit). Left: Overview of the RNAP is shown with the blue rectangle indicating the location of the zoomed-in (right) predicted binding region of the hybrid. The hybrid contains a predicted chain (orange) of polyethylene glycol with torsions in *gauche* conformation and a 1,2,3-triazol-4-yl-piperidyl linker. The position and orientation of rifampicin was determined by aligning a rifampicin-bound RNAP crystal structure (PDB ID: 4KMU<sup>23</sup>) onto our homology model.

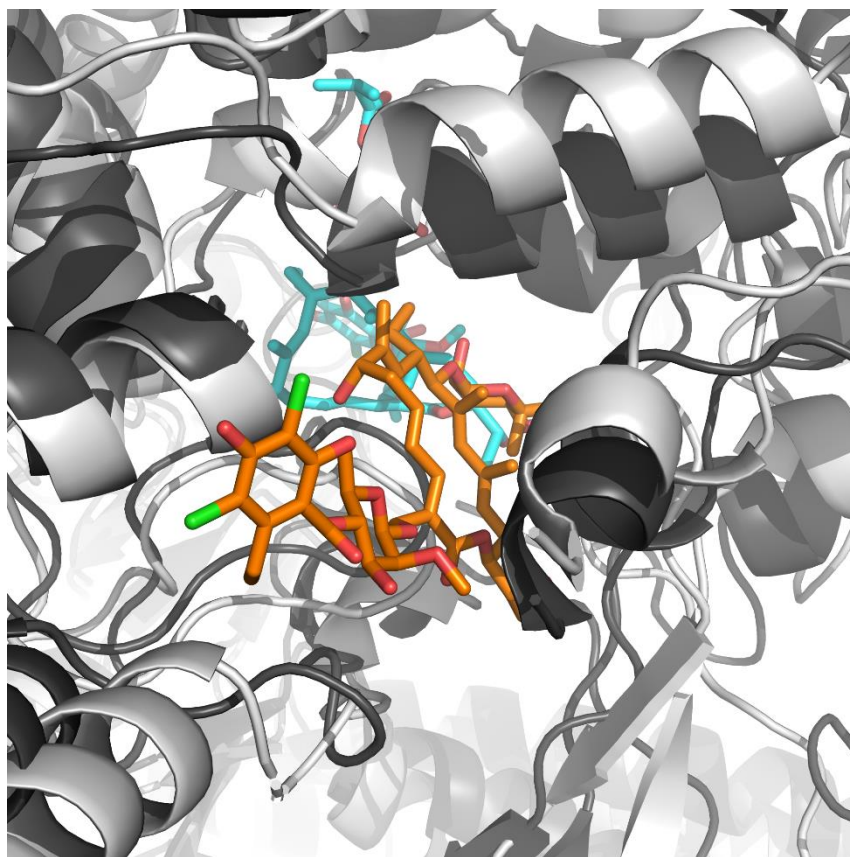

**Figure S2.** Comparison of the binding mode of Fidaxomicin in the structure of *M. tuberculosis* RNAP determined by cryo-EM (gray protein, orange ligand, PDB ID 6FBV<sup>27</sup>) or predicted by docking in a homology model (dark gray protein, blue ligand). In both binding modes, the binding sites of Fidaxomicin's macrocycle overlap, although the molecule's orientations differ. In the homology model, the binding site is narrower due to differently predicted loop conformations.

## General Procedure for Determination of Aqueous Solubility by UHPLC Analysis

### Determination of Aqueous Solubility

#### *Calibration with Methanol Solutions*

A standard stock solution of each analyte in MeOH at a concentration of 1.0 mg/mL was prepared. All analytes were completely soluble in MeOH. A standard stock solution of caffeine for use as internal standard (IS) in MeOH was prepared at a concentration of 1.0 mg/mL as well. These stock solutions were further diluted with MeOH to calibration standard samples at concentrations of 50, 100, 200, 300, 400, 500 µg/mL of analyte with each sample containing 50 µg/mL of caffeine as IS. These samples were analyzed by UHPLC [*Kinetex*® EVO C18; 1.7 µm; 100 Å, 50 mm x 2.1 mm; *Phenomenex*; solvent A: H<sub>2</sub>O + 0.1 % HCOOH, solvent B: MeCN + 0.1 % HCOOH; 0.4 mL/min; 1.0 µL injection volume, LC time program (min – % B): 0.50 min – 5 %, 3.50 min – 95 %, 3.55 min – 100 %]. The peak area of the analyte signal was divided by the peak area of the IS. This peak ratio was plotted against the analyte's concentration to obtain a linear equation.

#### *Determination of Aqueous Solubility*

For reproducibility reasons, water solubility of the fidaxomicin derivatives was quantified in a pH = 7 phosphate buffered aqueous solution (Acros, CAS 7558-79-4). A stock solution of caffeine in phosphate buffer at a concentration of 1.0 mg/mL was prepared and diluted to a concentration of 50 µg/mL. To 1.0 mL of this caffeine solution, the analyte was added as a solid until a saturated solution was obtained. This solution was stirred for 5 hours at room temperature. The mixture was filtered over a 0.22 µm syringe filter and the obtained solution was analyzed by UHPLC. The concentration was then calculated from the linear equation obtained from the calibration. With most samples of fidaxomicin derivatives, two peaks for the analyte were detected, namely one for the original substance and one for its regioisomer formed (isobutyl ester migration to adjacent hydroxyl group). Depending on whether peak areas were added or the isomer peak was ignored, the calculated values for aqueous solubility differed from each other.

## Antimicrobial Susceptibility Testing

### General procedure for the determination of MIC values of *B. subtilis* and *S. aureus*

| Organism                     | Strain    |
|------------------------------|-----------|
| <i>Bacillus subtilis</i>     | DSM3256   |
| <i>Staphylococcus aureus</i> | ATCC29213 |

The strains of *Bacillus subtilis* and *Staphylococcus aureus* were grown overnight at 37 °C on MH II agar plates. (BD™ BBL™ Mueller Hinton II Agar, BD Diagnostics). MIC values were determined by broth dilution method according to the recommendations of the Clinical and Laboratory Standards Institute (CLSI; U.S.A.). The inoculum size was about  $7.5 \times 10^5$  colony forming units/well. The compounds were diluted in H<sub>2</sub>O from 1.0 mg/mL stock solutions in 50 % methanol/H<sub>2</sub>O in a 2-fold dilution series. The microtiter plates were incubated at 37 °C overnight. Afterwards, the MIC (lowest concentration of the compounds with no bacterial growth observed) was determined by visual inspection.

### General procedure for the determination of MIC values of *M. tuberculosis*

MIC determination was essentially conducted as described recently.<sup>28</sup> Briefly, the Green-Fluorescent Protein (GFP) expressing recombinant *Mycobacterium tuberculosis* H37Rv *rpsL*<sup>29</sup> transformed with pOLYG-Pr-GFP<sup>30</sup> was grown in Middlebrook 7H9-OADC with 0.05 % Tween 80 until mid-log phase (optical density at 600 nm  $OD_{600} = 0.3 - 1.0$ ), diluted to an  $OD_{600}$  of 0.04 and 20  $\mu$ l of the suspension were added to an equal volume of 12-point two-fold serial dilutions of the compounds in 7H9-OADC-Tween in 384-well plates in triplicates. Compound concentrations were in the range of 62.5 to 0.031  $\mu$ M. Fluorescence was measured immediately after inoculation (background) and after 10 days of incubation at 37 °C. Dose response curves were fitted with a 4-parameter log-normal model.  $P_{MIN}$  [-,-] and  $P_{MAX}$  [-, 120] are the minimum and the maximum, respectively,  $P_{Hill}$  [0,-] indicates the steepness, and  $EC_{50}$  [-,-] the log-back transformed Minimal Effective Concentration 50. The computational and statistical analysis was conducted with R (3.0.1 – 3.1.1; <https://www.r-project.org/>). Dose response curves were fitted with the 'drc' package. The inhibitory potency I was calculated with the equation  $I = 100 - [100 \bullet (S-P)/N-P]$ . S is the sample's fluorescence while P and N derive from growth inhibition with the control drug (Kanamycin A) and solvent growth control measurements (DMSO 1.25 % vol./vol.), respectively. A fluorescence reduction of 90 % as compared to the no-drug control was reported as Minimal Inhibitory Concentration ( $MIC_{90}$ ).

Table 1 Determined MIC values in [ $\mu\text{g/mL}$ ]

| Compound                                             | <i>S. aureus</i> | <i>B. subtilis</i> | <i>M. tuberculosis</i> |
|------------------------------------------------------|------------------|--------------------|------------------------|
| 1                                                    | 8–16             | 8–16               | 0.25                   |
| 2a                                                   | 32–64            | 64–>64             | 4–8                    |
| 2b                                                   | >64              | >64                | 4–8                    |
| 3a                                                   | 32–64            | >64                | 4–8                    |
| 3b                                                   | >64              | >64                | 16–32                  |
| 4a                                                   | 16               | 32                 | 2                      |
| 4b                                                   | 32–64            | 8–16               | 0.5–1                  |
| fidaxomicin piperazine with alloc protecting group   | 16–32            | >64                | –                      |
| fidaxomicin dipiperazine with alloc protecting group | >64              | >64                | –                      |
| 5a                                                   | >64              | >64                | 1–2                    |
| 6a                                                   | 32               | 64–>64             | 8                      |
| 6b                                                   | >64              | >64                | 64                     |
| 7a                                                   | >64              | >64                | 16–32                  |
| 7b                                                   | 64               | 64                 | >64                    |
| 8a                                                   | >64              | >64                | 8–16                   |
| 8b                                                   | >64              | >64                | 2–4                    |
| 9b                                                   | n.d              | n.d                | n.d                    |
| 11a                                                  | >64              | >64                | >64                    |
| 11b                                                  | 64               | >64                | >64                    |
| 12a                                                  | >64              | >64                | 16                     |
| 13a                                                  | >64              | >64                | 4–8                    |
| 13b                                                  | >64              | 8–16               | 16–32                  |
| 15a                                                  | >64              | 32–>64             | 1–2                    |
| 15b                                                  | >64              | 64                 | –                      |
| 19                                                   | 2–8              | 2–32               | 0.5                    |
| Rifampicin                                           | 0.008            | 0.25               | 0.004                  |
| Ciprofloxacin                                        | –                | –                  | 1                      |

#### General procedure for the determination of MIC values of *C. difficile*

MIC determination was carried out by Micromyx, LLC, 4717 Campus Drive, Kalamazoo, MI, USA 49008. Approximately 5 mg of each of 20 test compounds were provided. These were stored at  $-20^{\circ}\text{C}$  until testing. On the day of the assay, the test articles were dissolved in 100% DMSO (dimethyl sulfoxide, Sigma; St. Louis, MO, Cat. No. 472301-500ML, Lot No. SHBH5551V) to a stock concentration of 3232  $\mu\text{g/mL}$ . The concentration range tested for these test agents was 16 – 0.015  $\mu\text{g/mL}$ . The comparator agents, metronidazole and clindamycin were supplied by Micromyx, as shown in the table below:

| Comparator Drug | Supplier | Catalog No. | Lot No.  | Solvent/Diluent | Testing Range (µg/mL) |
|-----------------|----------|-------------|----------|-----------------|-----------------------|
| Metronidazole   | Sigma    | M3761-100G  | 095K0693 | DMSO/dH2O       | 64 – 0.06             |
| Clindamycin     | Sigma    | C5269-100MG | 021M1533 | dH2O/ dH2O      | 32 – 0.03             |

### Test Organisms

Test organisms consisted of reference strains from the American Type Culture Collection (ATCC; Manassas, VA) and clinical isolates from the Micromyx repository (MMX; Kalamazoo, MI). Organisms were initially received at Micromyx and were streaked for isolation. Colonies were picked by sterile swab from the medium and suspended in the appropriate broth containing cryoprotectant. The suspensions were aliquoted into cryogenic vials and maintained at –80°C.

Prior to testing, all isolates were streaked onto Brucella Agar supplemented with hemin, Vitamin K and 5% sheep blood (Becton Dickinson [BD]; Sparks, MD, Cat. No. 297716, Lot No. 8256909) and incubated anaerobically at 35–37°C for 44 – 48 hours.

Additionally, *Bacteroides fragilis* ATCC 25285 and *Clostridium difficile* ATCC 700057 were tested for purposes of quality control.

### Test Medium

The medium employed for anaerobic testing in the broth microdilution MIC assay was Brucella Broth (BD, Cat. No. 211088, Lot No. 7128995), supplemented with hemin (Sigma, Lot No. SLBP5720V), Vitamin K (Sigma, Lot No. MKCG2075) and 5% laked horse blood (LHB, Cleveland Scientific; Bath, OH, Lot No. 474990).

### Broth Microdilution Assay

The MIC assay method followed the procedure described by the CLSI<sup>31,32</sup> and employed automated liquid handlers (Multidrop 384, Labsystems, Helsinki, Finland; Biomek 2000 and Biomek FX, Beckman Coulter, Fullerton CA) to conduct serial dilutions and liquid transfers. The wells in columns 2 through 12 in a standard 96-well microdilution plate (Costar) were filled with 150 µL of the appropriate diluent (DMSO for the test agents; dH2O for metronidazole and clindamycin). The drugs (300 µL at 101X the desired top concentration in the test plates) were dispensed into the appropriate well in column 1 of the mother plates. The Biomek 2000 was used to make serial 2-fold dilutions through column 11 in the “mother plate”. The wells of column 12 contained no drug and were the organism growth control wells.

The daughter plates for testing of all isolates were loaded with 190 µL per well of supplemented Brucella broth with 5% LHB using the Multidrop 384. The daughter plates were prepared on the Biomek FX instrument which transferred 2 µL of 101X drug solution from each well of a mother plate to the corresponding well of each daughter plate in a single step. The wells of the daughter plates ultimately contained 190 µL of medium, 2 µL of drug solution, and 10 µL of bacterial inoculum prepared in broth.



A standardized inoculum of each organism was prepared per CLSI methods.<sup>31,32</sup> For all bacteria, suspensions were prepared in supplemented Brucella broth supplemented with hemin and Vitamin K to equal the turbidity of a 0.5 McFarland standard. These suspensions were further diluted 1:10 in supplemented Brucella broth with 5% LHB. The inoculum was dispensed into sterile reservoirs (Beckman Coulter) and transferred by hand in the Bactron Anaerobe chamber so that inoculation took place from low to high drug concentration. A 10  $\mu$ L aliquot of inoculum was delivered into each well. Inoculated daughter plates were stacked and placed in an anaerobic box with GasPak sachets (BD; Lot No. 6309689), covered with a lid on the top plate, and incubated at 35 – 37°C. The microplates were viewed from the bottom using a plate viewer after 46 hours. For each mother plate, an uninoculated solubility control plate was observed for evidence of drug precipitation. The MIC was read and recorded as the lowest concentration of drug that inhibited visible growth of the organism.

Table 2 Determination of MIC values against *C. difficile* in  $\mu$ g/mL

| Compound             | MIC in $\mu$ g/mL                 |                                   |                                 |                                 |                                              |                                      |                                      |                                      |                                      |                                      |
|----------------------|-----------------------------------|-----------------------------------|---------------------------------|---------------------------------|----------------------------------------------|--------------------------------------|--------------------------------------|--------------------------------------|--------------------------------------|--------------------------------------|
|                      | <i>C. difficile</i><br>ATCC 43255 | <i>C. difficile</i><br>ATCC 70057 | <i>C. difficile</i><br>BAA-1805 | <i>C. difficile</i><br>BAA-1875 | <i>C. difficile</i><br>ATCC 9689 (rt<br>568) | <i>C. difficile</i><br>8260 (rt 017) | <i>C. difficile</i><br>8282 (rt 017) | <i>C. difficile</i><br>5680 (rt 027) | <i>C. difficile</i><br>8264 (rt 027) | <i>C. difficile</i><br>8290 (rt 078) |
| <b>Metronidazole</b> | 0.25                              | 0.25                              | 1                               | 0.25                            | 0.25                                         | 0.12                                 | 0.25                                 | 0.5                                  | 2                                    | 0.25                                 |
| <b>Clindamycin</b>   | 1                                 | 2                                 | 4                               | 8                               | 1                                            | >32                                  | >32                                  | 4                                    | 4                                    | 4                                    |
| <b>1</b>             | 0.03                              | 0.03                              | 0.12                            | 0.03                            | $\leq$ 0.015                                 | 0.06                                 | 0.03                                 | 0.06                                 | 0.12                                 | 0.03                                 |
| <b>4a</b>            | >16                               | 8                                 | >16                             | 8                               | 2                                            | 16                                   | 8                                    | >16                                  | >16                                  | 16                                   |
| <b>4b</b>            | >16                               | 16                                | >16                             | 16                              | 4                                            | 16                                   | 16                                   | >16                                  | >16                                  | 16                                   |
| <b>5a</b>            | 0.5                               | 0.25                              | 0.5                             | 0.5                             | 0.03                                         | 0.03                                 | 0.06                                 | 0.5                                  | 0.5                                  | 0.25                                 |
| <b>9b</b>            | 0.12                              | 0.06                              | 0.25                            | 0.25                            | 0.03                                         | 0.12                                 | 0.06                                 | 0.5                                  | 0.25                                 | 0.12                                 |
| <b>13a</b>           | 4                                 | 2                                 | 8                               | 2                               | 0.5                                          | 4                                    | 1                                    | 8                                    | 8                                    | 4                                    |
| <b>13b</b>           | >16                               | >16                               | >16                             | >16                             | >16                                          | >16                                  | >16                                  | >16                                  | >16                                  | >16                                  |
| <b>15a</b>           | 0.03                              | 0.06                              | 0.12                            | 0.06                            | $\leq$ 0.015                                 | 0.03                                 | 0.03                                 | 0.12                                 | 0.12                                 | 0.12                                 |
| <b>15b</b>           | >16                               | >16                               | >16                             | >16                             | >16                                          | >16                                  | >16                                  | >16                                  | >16                                  | >16                                  |
| <b>19</b>            | $\leq$ 0.015                      | $\leq$ 0.015                      | $\leq$ 0.015                    | $\leq$ 0.015                    | $\leq$ 0.015                                 | $\leq$ 0.015                         | 4                                    | $\leq$ 0.015                         | 0.03                                 | 0.03                                 |
| <b>Rifampicin</b>    | $\leq$ 0.015                      | $\leq$ 0.015                      | $\leq$ 0.015                    | $\leq$ 0.015                    | $\leq$ 0.015                                 | >16                                  | >16                                  | $\leq$ 0.015                         | $\leq$ 0.015                         | $\leq$ 0.015                         |
| <b>Ciprofloxacin</b> | >16                               | >16                               | >16                             | >16                             | 16                                           | >16                                  | >16                                  | >16                                  | >16                                  | >16                                  |

## References

- (1) Fulmer, G. R.; Miller, A. J. M.; Sherden, N. H.; Gottlieb, H. E.; Nudelman, A.; Stoltz, B. M.; Bercaw, J. E.; Goldberg, K. I. NMR Chemical Shifts of Trace Impurities: Common Laboratory Solvents, Organics, and Gases in Deuterated Solvents Relevant to the Organometallic Chemist. *Organometallics* **2010**, *29* (9), 2176–2179.
- (2) An, H.; Wang, T.; Mohan, V.; Griffey, R. H.; Dan Cook, P. Solution Phase Combinatorial Chemistry. Discovery of 13- and 15-Membered Polyazapyridinocyclophane Libraries with Antibacterial Activity. *Tetrahedron* **1998**, *54* (16), 3999–4012.
- (3) Smeenk, L. E. J.; Dailly, N.; Hiemstra, H.; Van Maarseveen, J. H.; Timmerman, P. Synthesis of Water-Soluble Scaffolds for Peptide Cyclization, Labeling, and Ligation. *Org. Lett.* **2012**, *14* (5), 1194–1197.
- (4) Gobbo, P.; Gunawardene, P.; Luo, W.; Workentin, M. S. Synthesis of a Toolbox of Clickable Rhodamine B Derivatives. *Synlett* **2015**, *26* (9), 1169–1174.
- (5) Brullo, C.; Massa, M.; Rocca, M.; Rotolo, C.; Guariento, S.; Rivera, D.; Ricciarelli, R.; Fedele, E.; Fossa, P.; Bruno, O. Synthesis, Biological Evaluation, and Molecular Modeling of New 3-(Cyclopentyloxy)-4-Methoxybenzaldehyde O-(2-(2,6-Dimethylmorpholino)-2-Oxoethyl) Oxime (GEBR-7b) Related Phosphodiesterase 4D (PDE4D) Inhibitors. *J. Med. Chem.* **2014**, *57* (16), 7061–7072.
- (6) Schnell, S. D.; Hoff, L. V.; Panchagnula, A.; Wurzenberger, M. H. H.; Klapötke, T. M.; Sieber, S.; Linden, A.; Gademann, K. 3-Bromotetrazine: Labelling of Macromolecules via Monosubstituted Bifunctional s-Tetrazines. *Chem. Sci.* **2020**, *11* (11), 3042–3047.
- (7) Gann, A. W.; Amoroso, J. W.; Einck, V. J.; Rice, W. P.; Chambers, J. J.; Schnarr, N. A. A Photoinduced, Benzyne Click Reaction. *Org. Lett.* **2014**, *16* (7), 2003–2005.
- (8) Bucher, J.; Wurm, T.; Nalivela, K. S.; Rudolph, M.; Rominger, F.; Hashmi, A. S. K. Cyclization of Gold Acetylides: Synthesis of Vinyl Sulfonates via Gold Vinylidene Complexes. *Angew. Chem. Int. Ed.* **2014**, *53* (15), 3854–3858.
- (9) Berg, R.; Straub, J.; Schreiner, E.; Mader, S.; Rominger, F.; Straub, B. F. Highly Active Dinuclear Copper Catalysts for Homogeneous Azide-Alkyne Cycloadditions. *Adv. Synth. Catal.* **2012**, *354* (18), 3445–3450.
- (10) Cochrane, S. A.; Li, X.; He, S.; Yu, M.; Wu, M.; Vederas, J. C. Synthesis of Tridecaptin-Antibiotic Conjugates with in Vivo Activity against Gram-Negative Bacteria. *J. Med. Chem.* **2015**, *58* (24), 9779–9785.
- (11) Widderich, N.; Pittelkow, M.; Höppner, A.; Mulnaes, D.; Buckel, W.; Gohlke, H.; Smits, S. H. J.; Bremer, E. Molecular Dynamics Simulations and Structure-Guided Mutagenesis Provide Insight into the Architecture of the Catalytic Core of the Ectoine Hydroxylase. *J. Mol. Biol.* **2014**, *426* (3), 586–600.
- (12) Milić, D.; Dick, M.; Mulnaes, D.; Pflieger, C.; Kinnen, A.; Gohlke, H.; Groth, G. Recognition Motif and Mechanism of Ripening Inhibitory Peptides in Plant Hormone Receptor ETR1. *Sci. Rep.* **2018**, *8* (1), 3890.
- (13) Gohlke, H.; Hergert, U.; Meyer, T.; Mulnaes, D.; Grieshaber, M. K.; Smits, S. H. J.; Schmitt, L. Binding Region of Alanopine Dehydrogenase Predicted by Unbiased Molecular Dynamics Simulations of Ligand Diffusion. *J. Chem. Inf. Model.* **2013**, *53* (10), 2493–2498.
- (14) Maestro.Pdf. *Maestro* **2014**, version 9.9.013; Schrödinger, LLC: New York, NY.
- (15) Goodsell, D. S.; Morris, G. M.; Olson, A. J. Automated Docking of Flexible Ligands: Applications of AutoDock. *J. Mol. Recognit.* **1996**, *9* (1), 1–5.
- (16) Gohlke, H.; Hendlich, M.; Klebe, G. Knowledge-Based Scoring Function to Predict Protein-Ligand Interactions. *J. Mol. Biol.* **2000**, *295* (2), 337–356.
- (17) Sottriffer, C. A.; Gohlke, H.; Klebe, G. Docking into Knowledge-Based Potential Fields: A Comparative Evaluation of DrugScore. *J. Med. Chem.* **2002**, *45* (10), 1967–1970.

- (18) Forli, S.; Huey, R.; Pique, M. E.; Sanner, M. F.; Goodsell, D. S.; Olson, A. J. Computational Protein-Ligand Docking and Virtual Drug Screening with the AutoDock Suite. *Nat. Protoc.* **2016**, *11* (5), 905–919.
- (19) Artsimovitch, I.; Seddon, J.; Sears, P. Fidaxomicin Is an Inhibitor of the Initiation of Bacterial RNA Synthesis. *Clin. Infect. Dis.* **2012**, *55*, 127–131.
- (20) Diedrich, D.; Hamacher, A.; Gertzen, C. G. W.; Alves Avelar, L. A.; Reiss, G. J.; Kurz, T.; Gohlke, H.; Kassack, M. U.; Hansen, F. K. Rational Design and Diversity-Oriented Synthesis of Peptoid-Based Selective HDAC6 Inhibitors. *Chem. Commun.* **2016**, *52* (15), 3219–3222.
- (21) Stenzel, K.; Hamacher, A.; Hansen, F. K.; Gertzen, C. G. W.; Senger, J.; Marquardt, V.; Marek, L.; Marek, M.; Romier, C.; Remke, M.; Jung, M.; Gohlke, H.; Kassack, M. U.; Kurz, T. Alkoxyurea-Based Histone Deacetylase Inhibitors Increase Cisplatin Potency in Chemoresistant Cancer Cell Lines. *J. Med. Chem.* **2017**, *60* (13), 5334–5348.
- (22) Krieger, V.; Hamacher, A.; Gertzen, C. G. W.; Senger, J.; Zwinderman, M. R. H.; Marek, M.; Romier, C.; Dekker, F. J.; Kurz, T.; Jung, M.; Gohlke, H.; Kassack, M. U.; Hansen, F. K. Design, Multicomponent Synthesis, and Anticancer Activity of a Focused Histone Deacetylase (HDAC) Inhibitor Library with Peptoid-Based Cap Groups. *J. Med. Chem.* **2017**, *60* (13), 5493–5506.
- (23) Molodtsov, V.; Nawarathne, I. N.; Scharf, N. T.; Kirchhoff, P. D.; Showalter, H. D. H.; Garcia, G. A.; Murakami, K. S. X-Ray Crystal Structures of the Escherichia Coli RNA Polymerase in Complex with Benzoxazinorifamycins. *J. Med. Chem.* **2013**, *56* (11), 4758–4763.
- (24) Liu, K. J.; Parsons, J. L. Solvent Effects on the Preferred Conformation of Poly (Ethylene Glycols). *Macromolecules* **1969**, *2* (5), 529–533.
- (25) Stierand, K.; Maaß, P. C.; Rarey, M. Molecular Complexes at a Glance: Automated Generation of Two-Dimensional Complex Diagrams. *Bioinformatics* **2006**, *22* (14), 1710–1716.
- (26) Fricker, P. C.; Gastreich, M.; Rarey, M. Automated Drawing of Structural Molecular Formulas under Constraints. *J. Chem. Inf. Comput. Sci.* **2004**, *44* (3), 1065–1078.
- (27) Lin, W.; Das, K.; Degen, D.; Zhang, C.; Ebright, R. H.; Lin, W.; Das, K.; Degen, D.; Mazumder, A.; Duchi, D.; Wang, D.; Ebright, Y. W. Structural Basis of Transcription Inhibition by Fidaxomicin (Lipiarmycin A3). *Mol. Cell* **2018**, *70*, 60–71.
- (28) Dal Molin, M.; Selchow, P.; Schäfle, D.; Tschumi, A.; Ryckmans, T.; Laage-Witt, S.; Sander, P. Identification of Novel Scaffolds Targeting Mycobacterium Tuberculosis. *J. Mol. Med.* **2019**, *97*, 1601–1613.
- (29) Raynaud, C.; Papavinasundaram, K. G.; Speight, R. A.; Springer, B.; Sander, P.; Böttger, E. C.; Colston, M. J.; Draper, P. The Functions of OmpATb, a Pore-Forming Protein of Mycobacterium Tuberculosis. *Mol. Microbiol.* **2002**, *46* (1), 191–201.
- (30) Matt, U.; Selchow, P.; Dal Molin, M.; Strommer, S.; Sharif, O.; Schilcher, K.; Andreoni, F.; Stenzinger, A.; Zinkernagel, A. S.; Zeitlinger, M.; Sander, P.; Nemeth, J. Chloroquine Enhances the Antimycobacterial Activity of Isoniazid and Pyrazinamide by Reversing Inflammation-Induced Macrophage Efflux. *Int. J. Antimicrob. Agents* **2017**, *50* (1), 55–62.
- (31) Clinical and Laboratory Standards Institute (CLSI). *Performance Standards for Antimicrobial Susceptibility Testing: 29th Edition*; **2019**.
- (32) Clinical and Laboratory Standards Institute (CLSI). *Methods for Antimicrobial Susceptibility Testing of Anaerobic Bacteria: Ninth Edition*; **2018**; Vol. 9.

# Fidaxomicin Acetamide (2a)

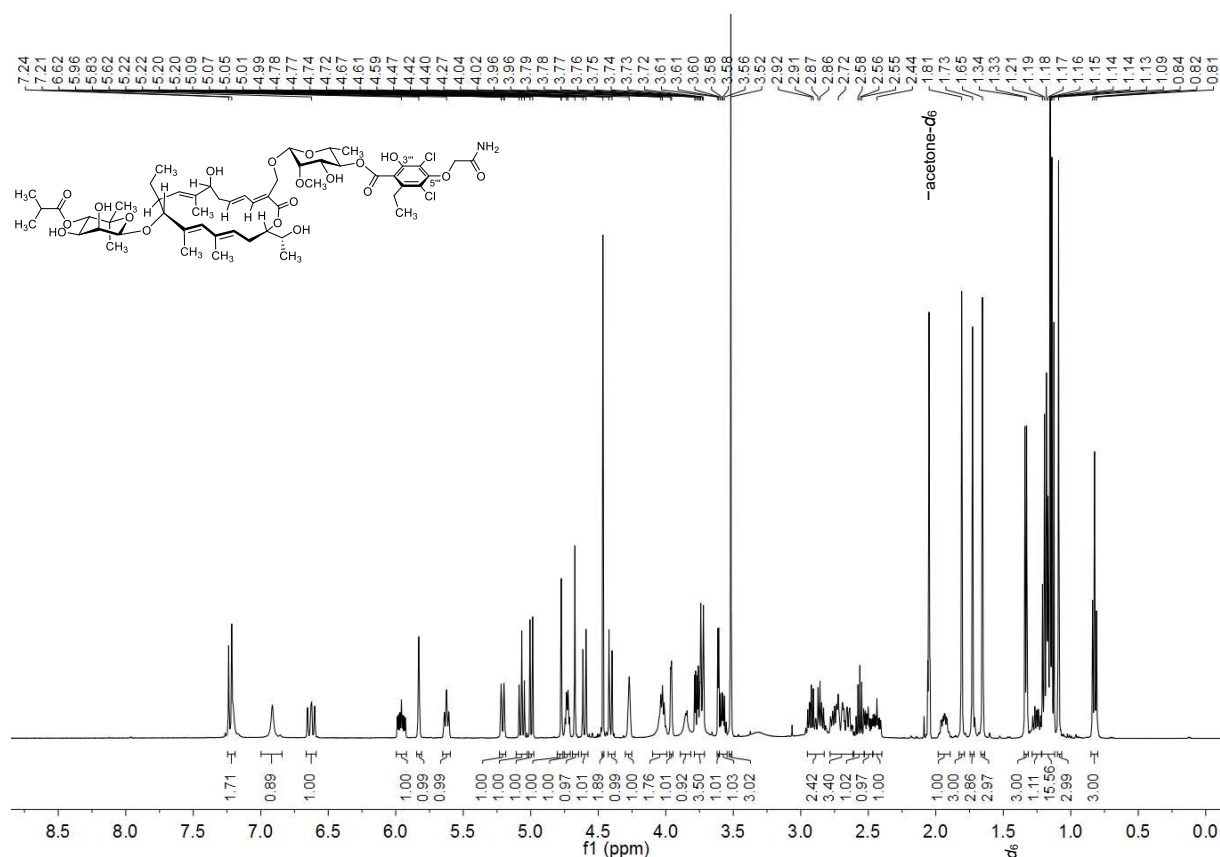

## <sup>13</sup>C NMR (125.81 MHz, 298 K, acetone-*d*<sub>6</sub>)

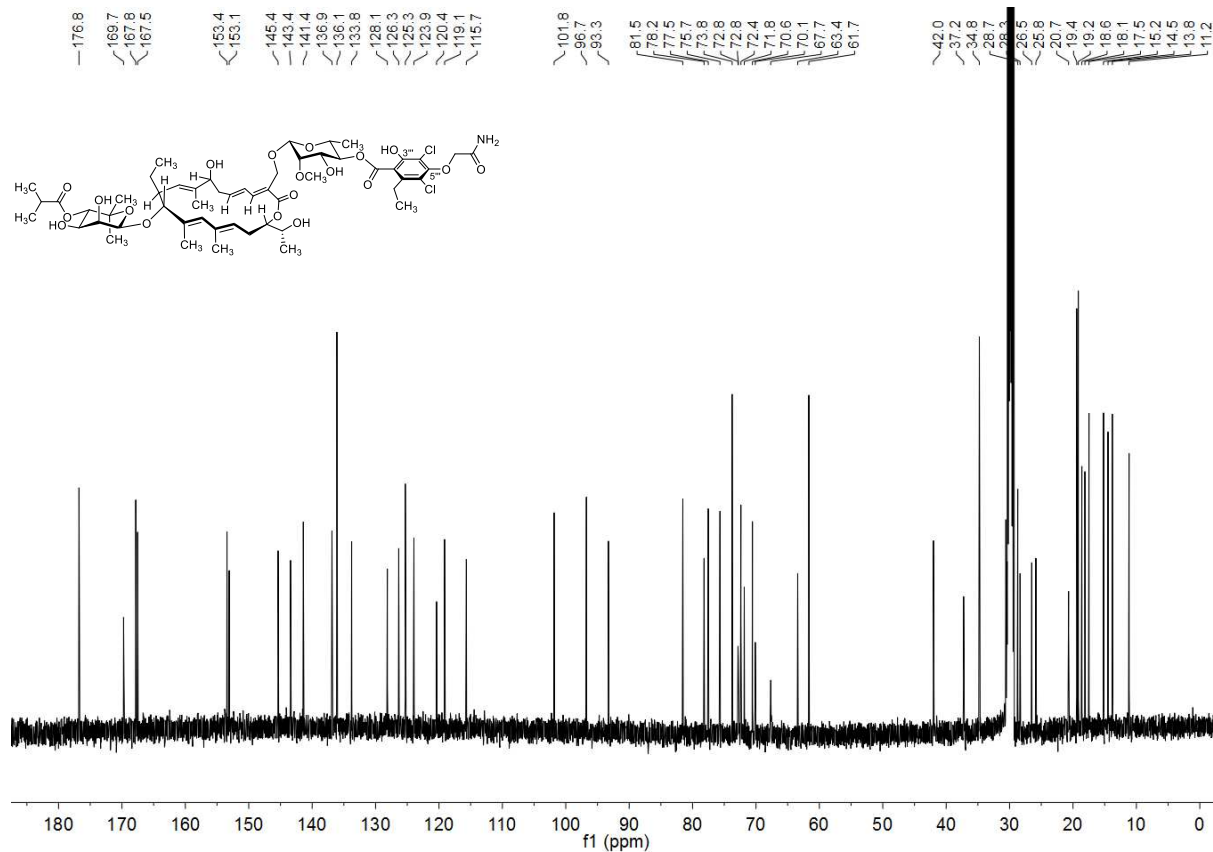

## <sup>13</sup>C NMR (125.81 MHz, 298 K, acetone-*d*<sub>6</sub>)

# Fidaxomicin Bis(acetamide) (2b)

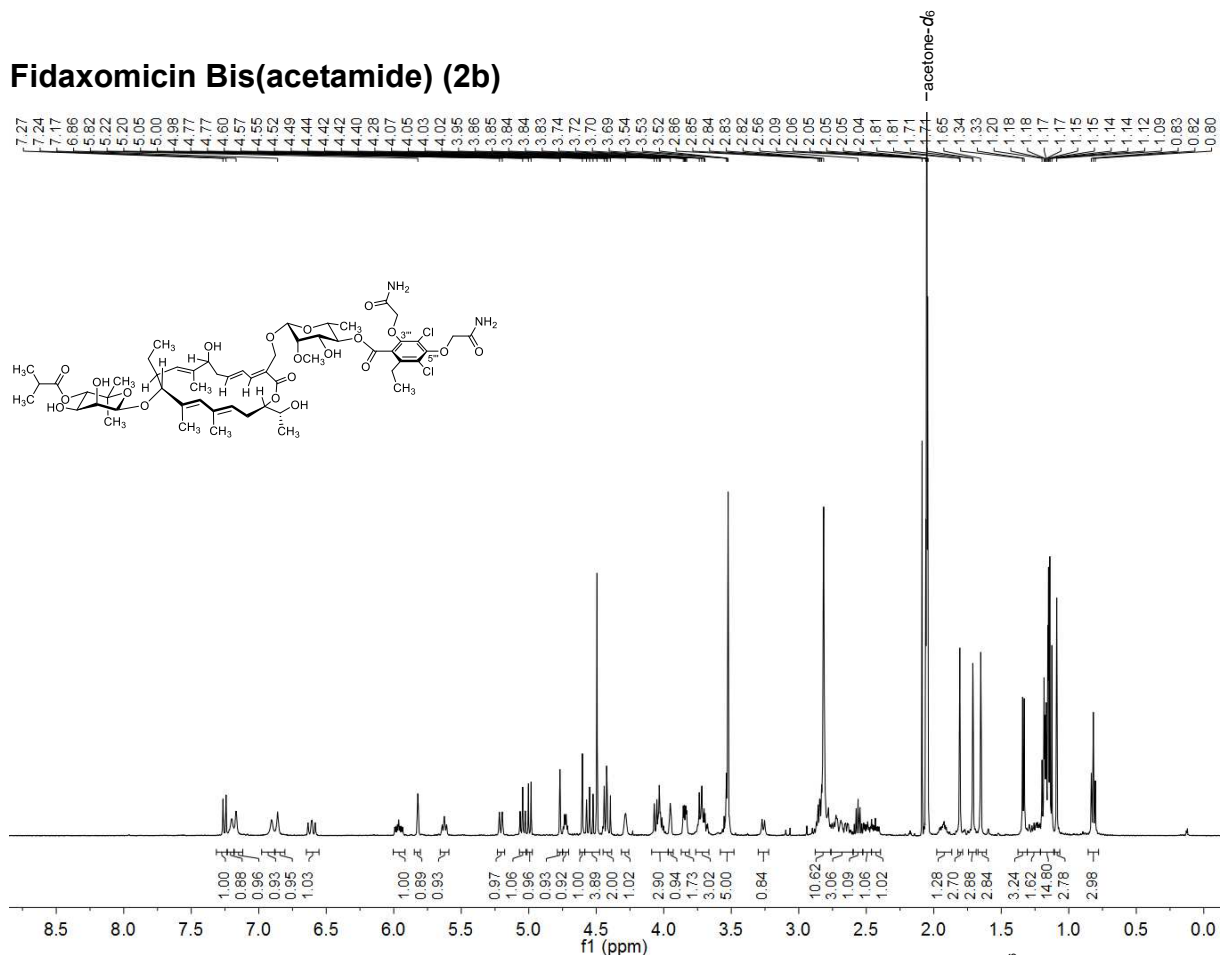

# <sup>13</sup>C NMR (125.81 MHz, 298 K, acetone-d<sub>6</sub>)

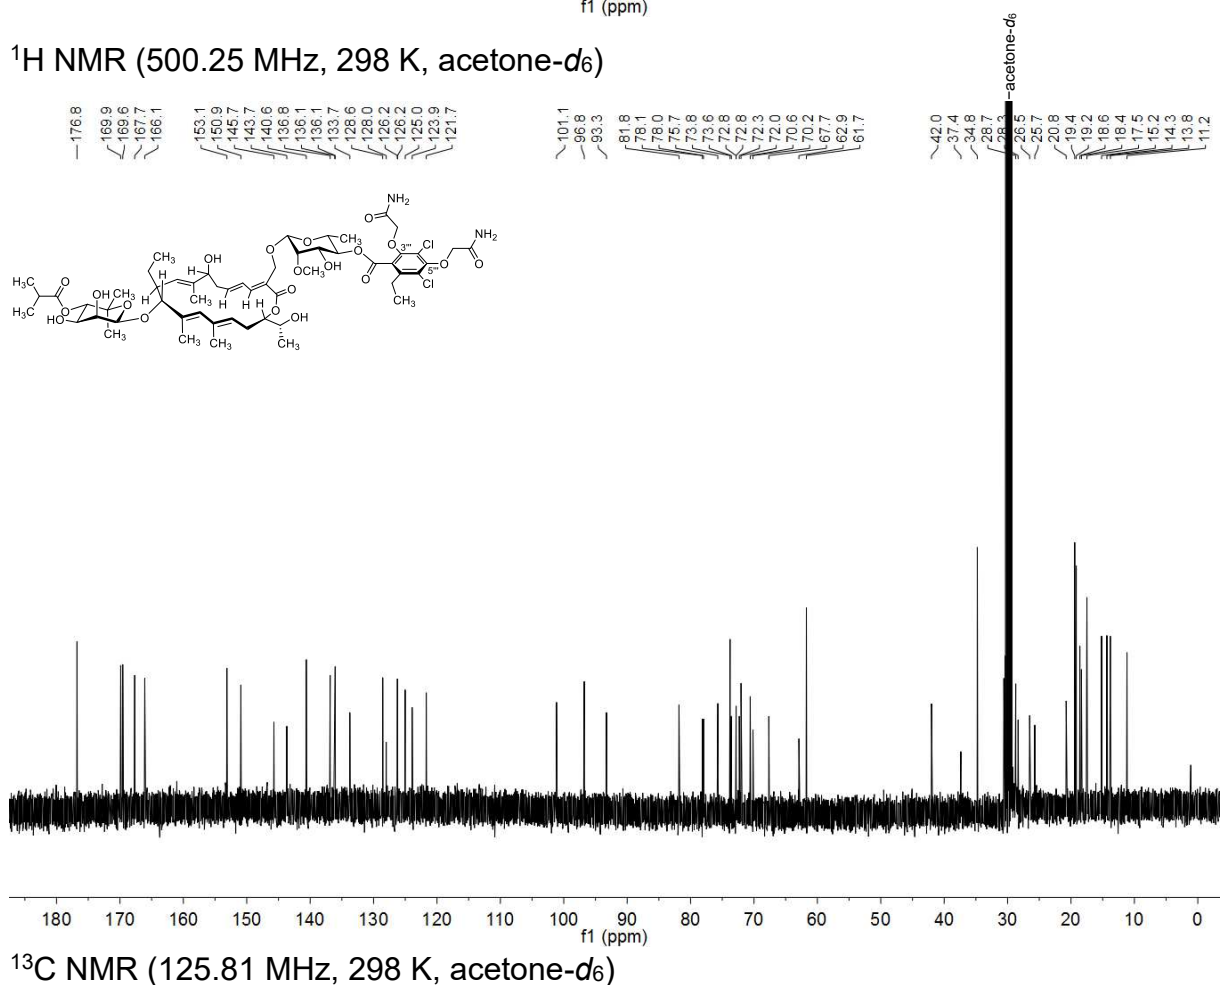

# Fidaxomicin Dimethylacetamide (3a)

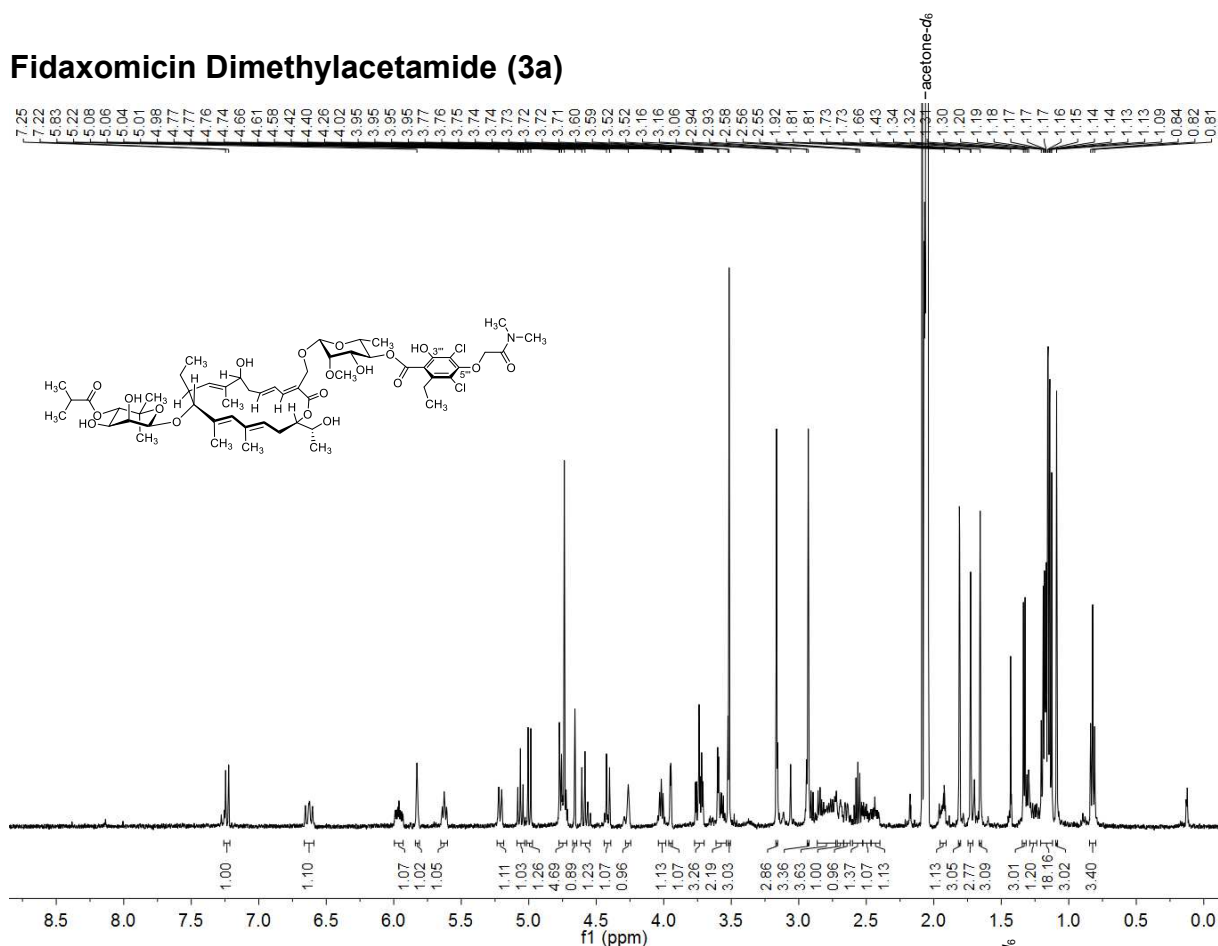

# <sup>13</sup>C NMR (125.81 MHz, 300 K, acetone-*d*<sub>6</sub>)

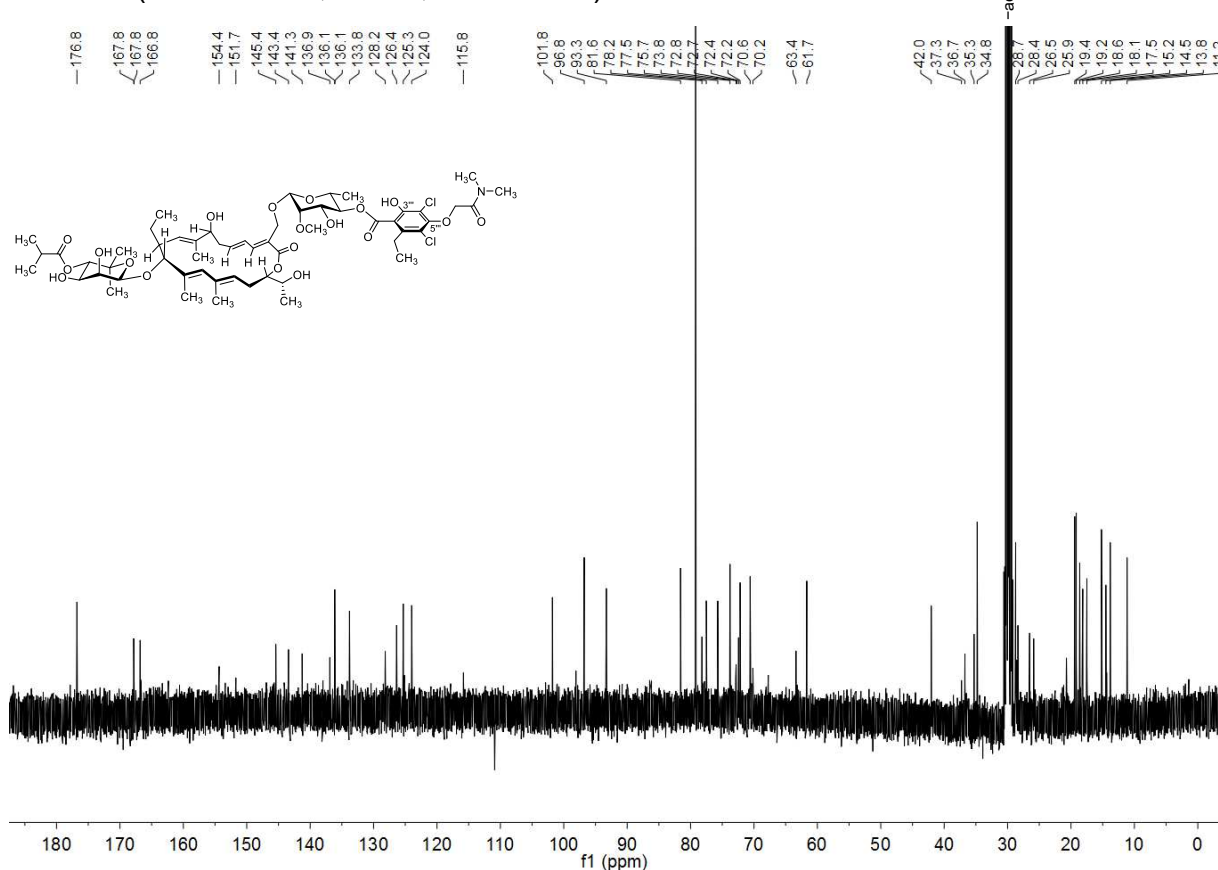

# <sup>13</sup>C NMR (125.81 MHz, 300 K, acetone-*d*<sub>6</sub>)

# Fidaxomicin Bis(dimethylacetamide) (3b)

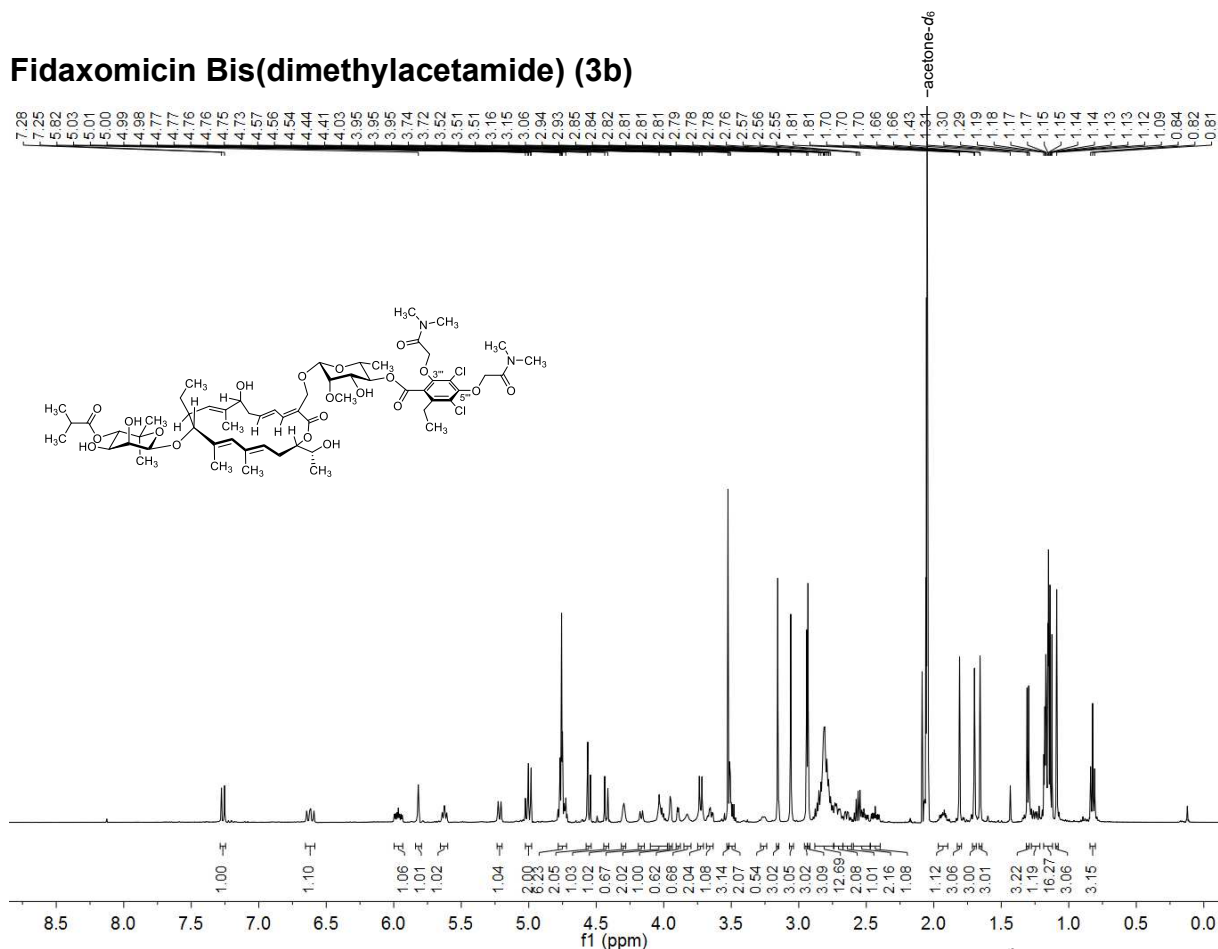

# <sup>13</sup>C NMR (125.81 MHz, 300 K, acetone-*d*<sub>6</sub>)

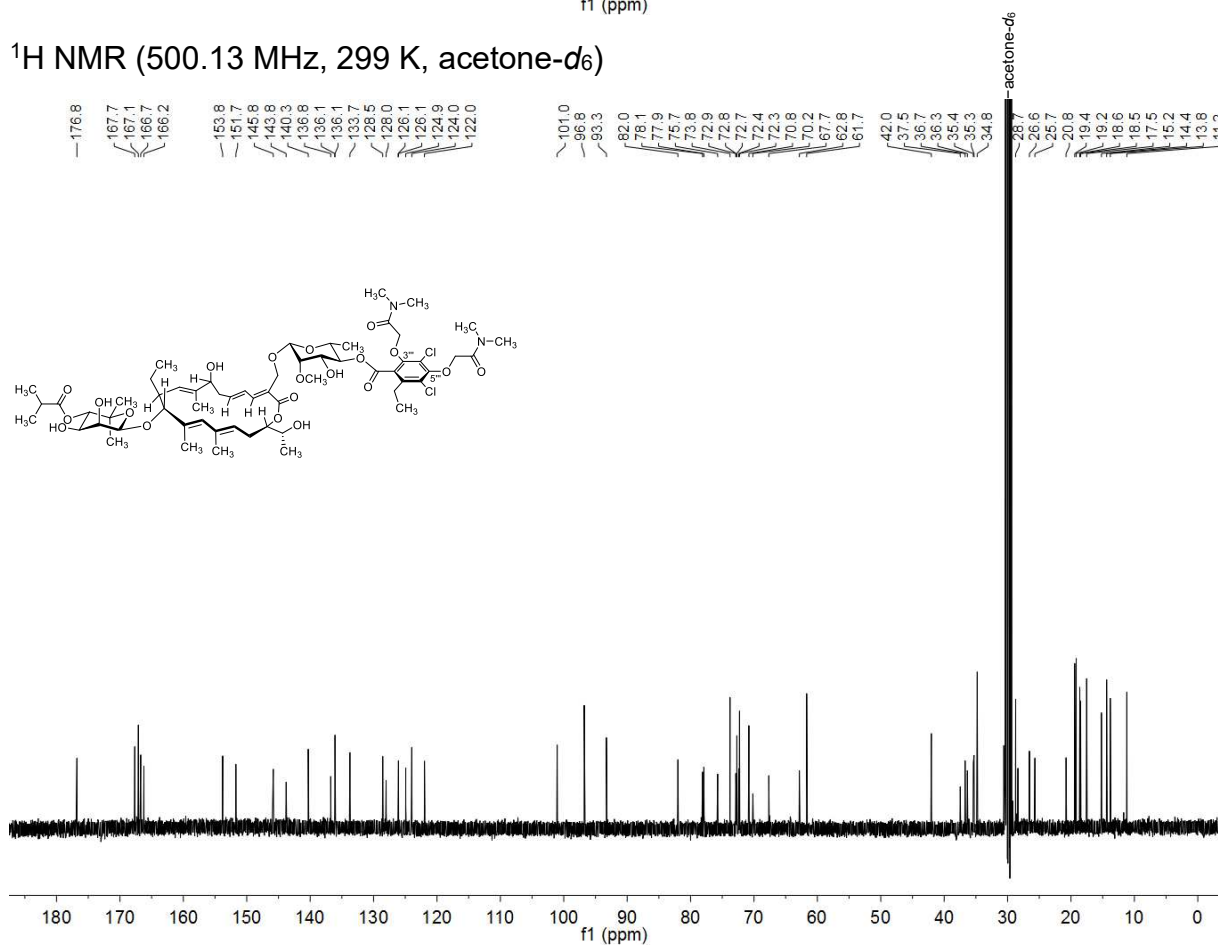

# Fidaxomicin Ethylacetate (4a)

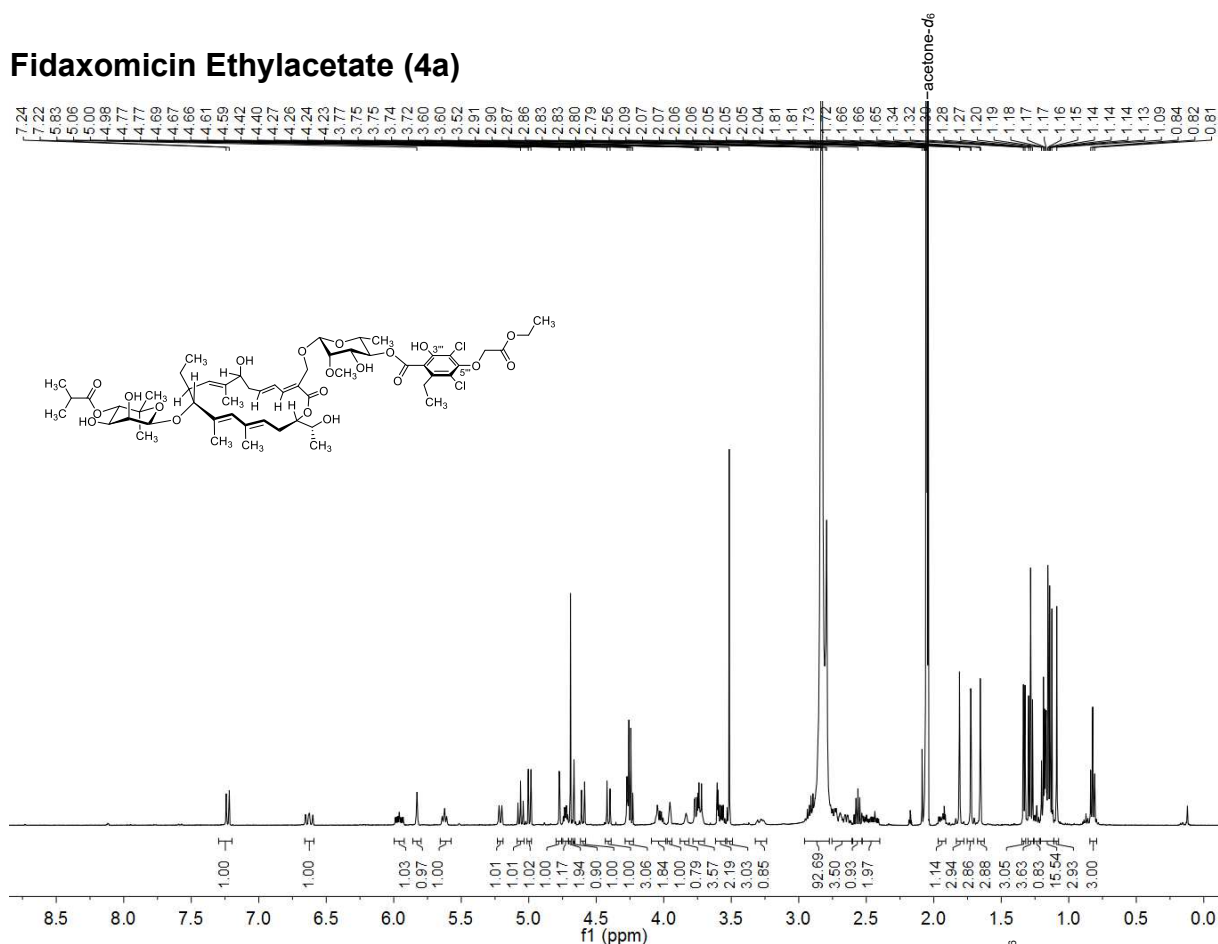

# <sup>13</sup>C NMR (125.81 MHz, 300 K, acetone-d<sub>6</sub>)

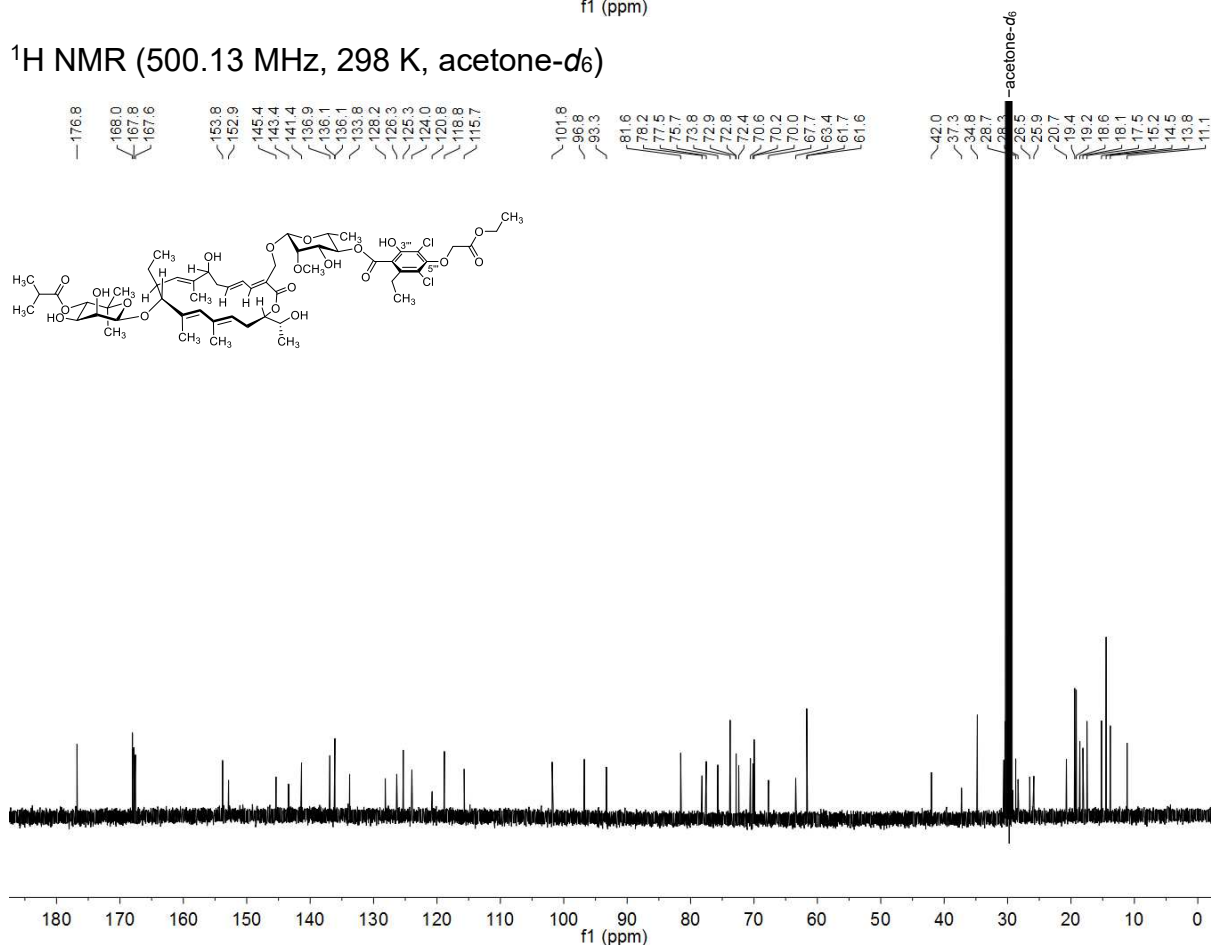

# <sup>13</sup>C NMR (125.81 MHz, 300 K, acetone-d<sub>6</sub>)



# Fidaxomicin Bis(ethylacetate) (4b)

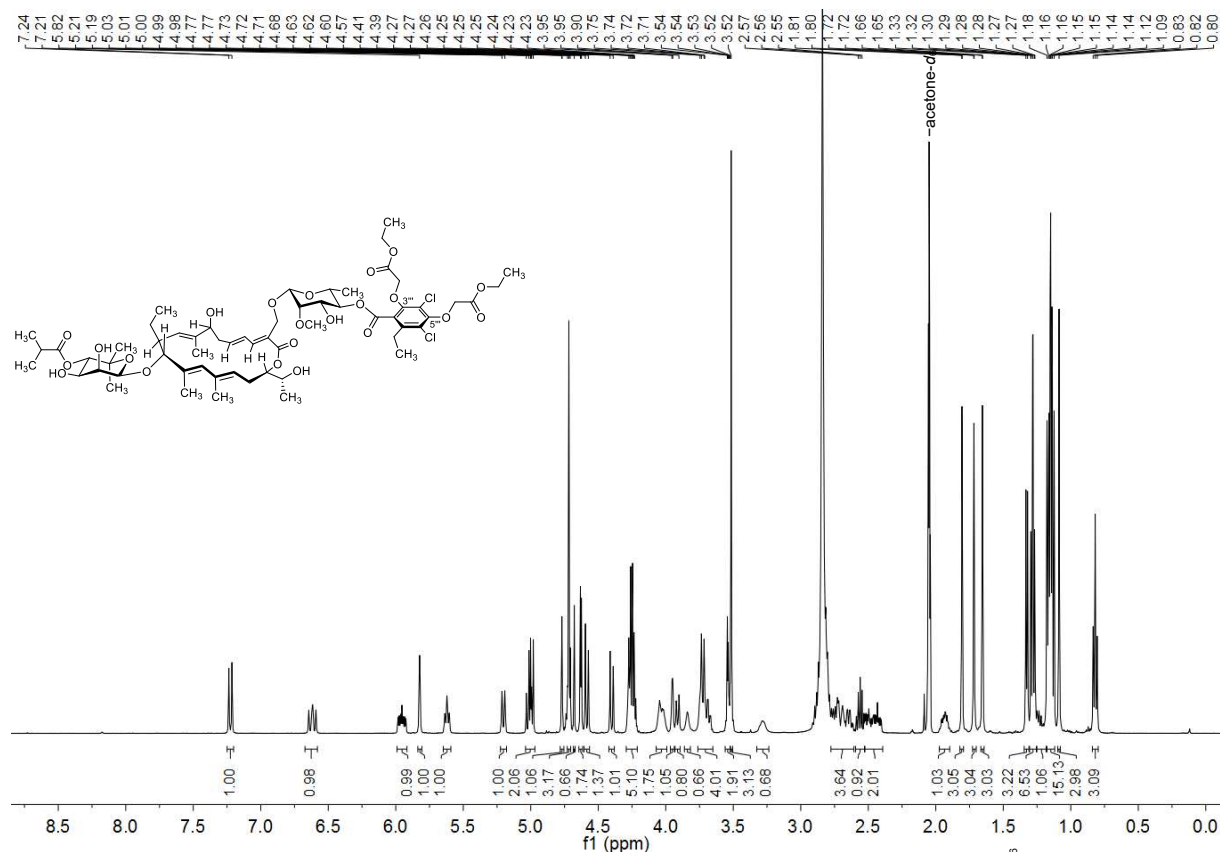

## <sup>1</sup>H NMR (500.13 MHz, 298 K, acetone-d<sub>6</sub>)

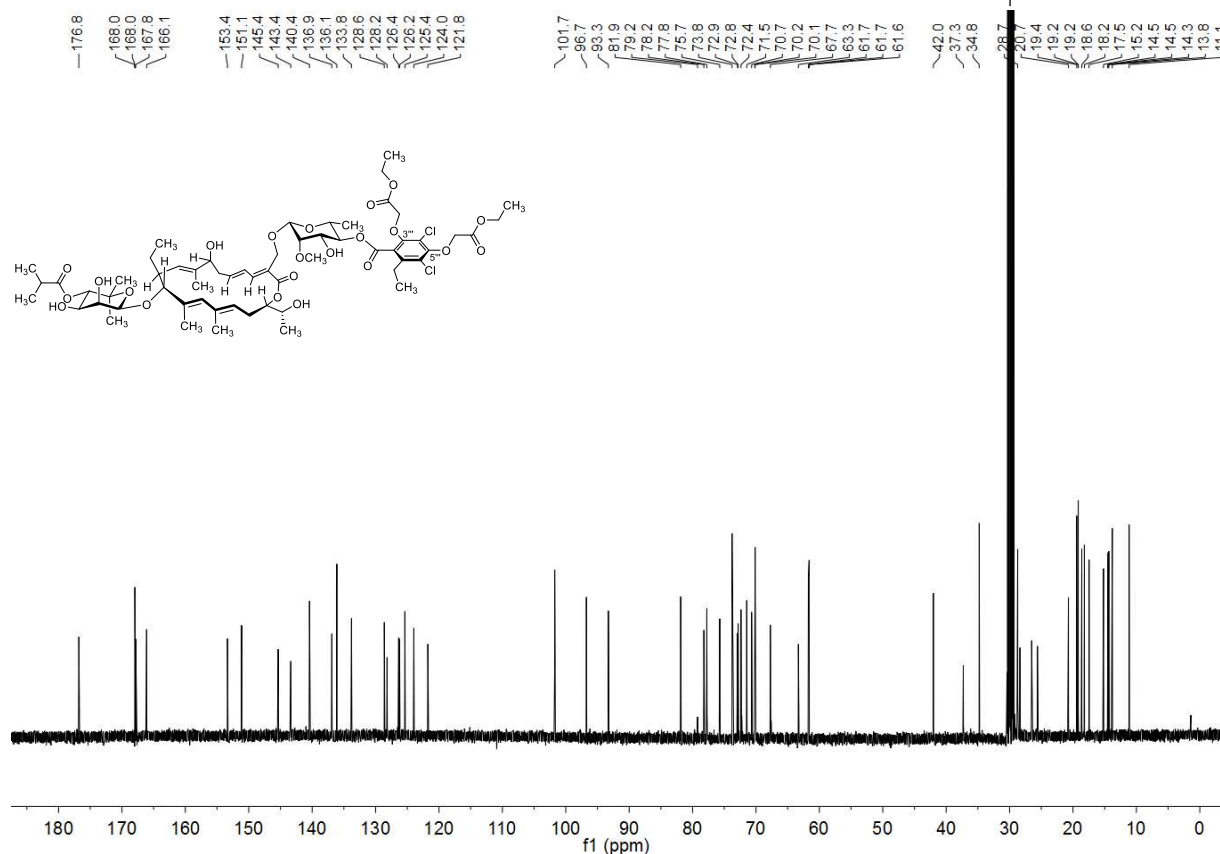

## <sup>13</sup>C NMR (125.81 MHz, 300 K, acetone-d<sub>6</sub>)

# Allyl 4-(2-chloroacetyl)piperazine-1-carboxylate

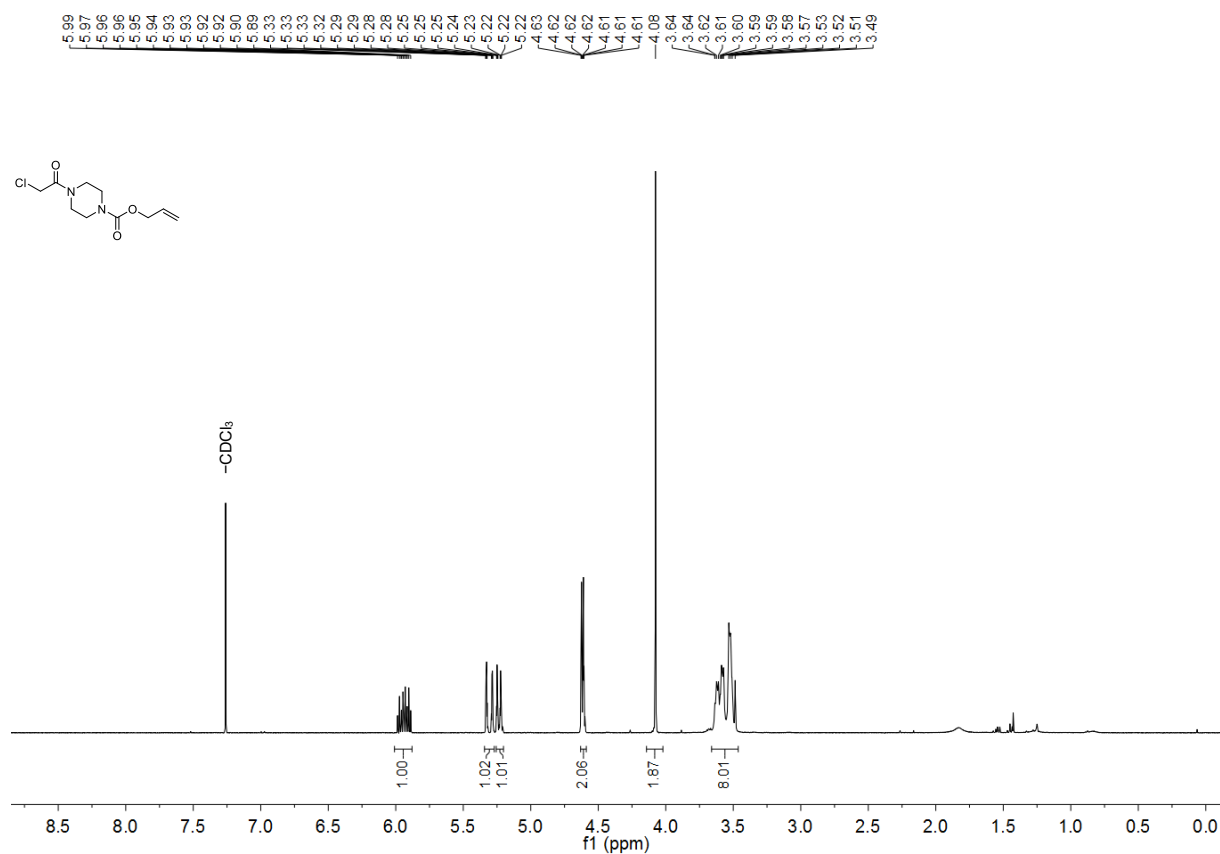

<sup>1</sup>H NMR (400.13 MHz, 300 K, CDCl<sub>3</sub>)

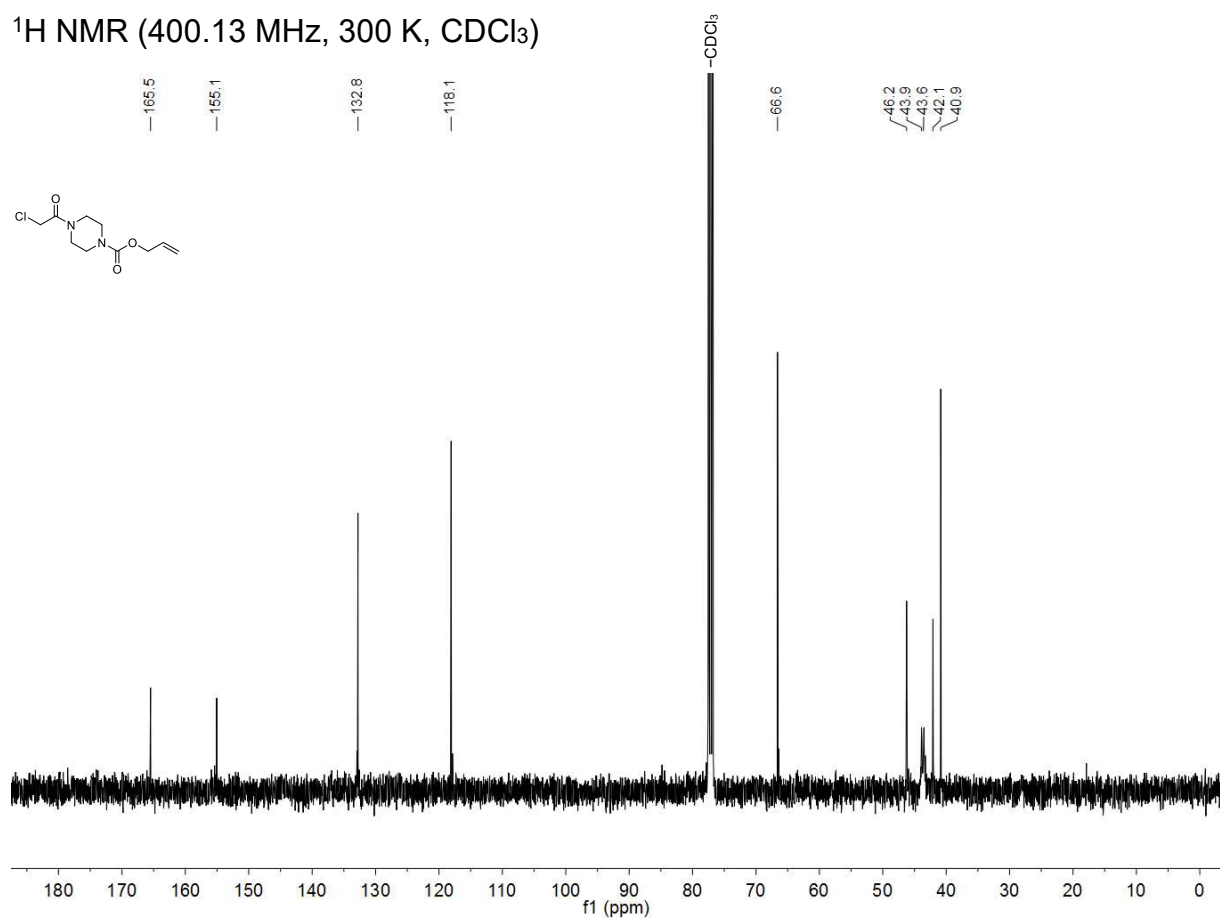

<sup>13</sup>C NMR (100.62 MHz, 300 K, CDCl<sub>3</sub>)

# Allyl 4-(2-iodoacetyl)piperazine-1-carboxylate

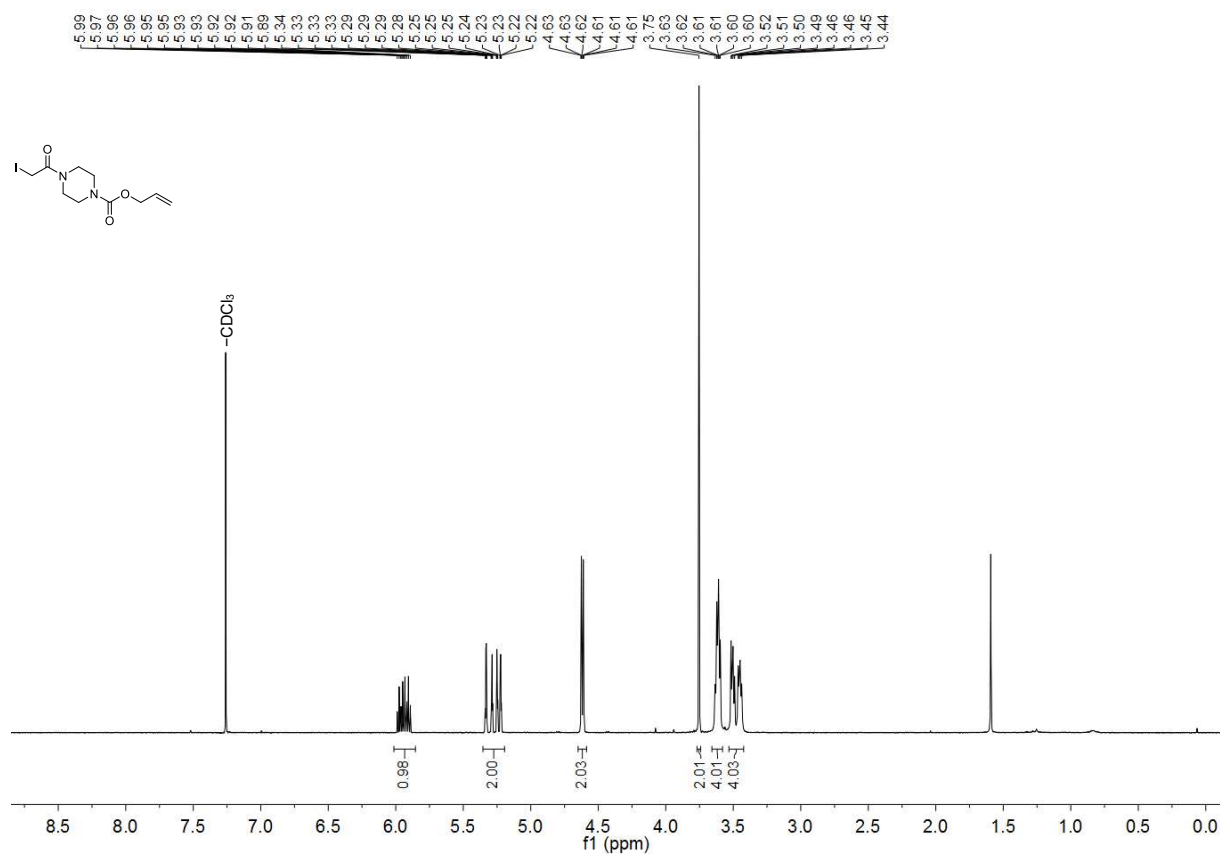

<sup>1</sup>H NMR (400.13 MHz, 300 K, CDCl<sub>3</sub>)

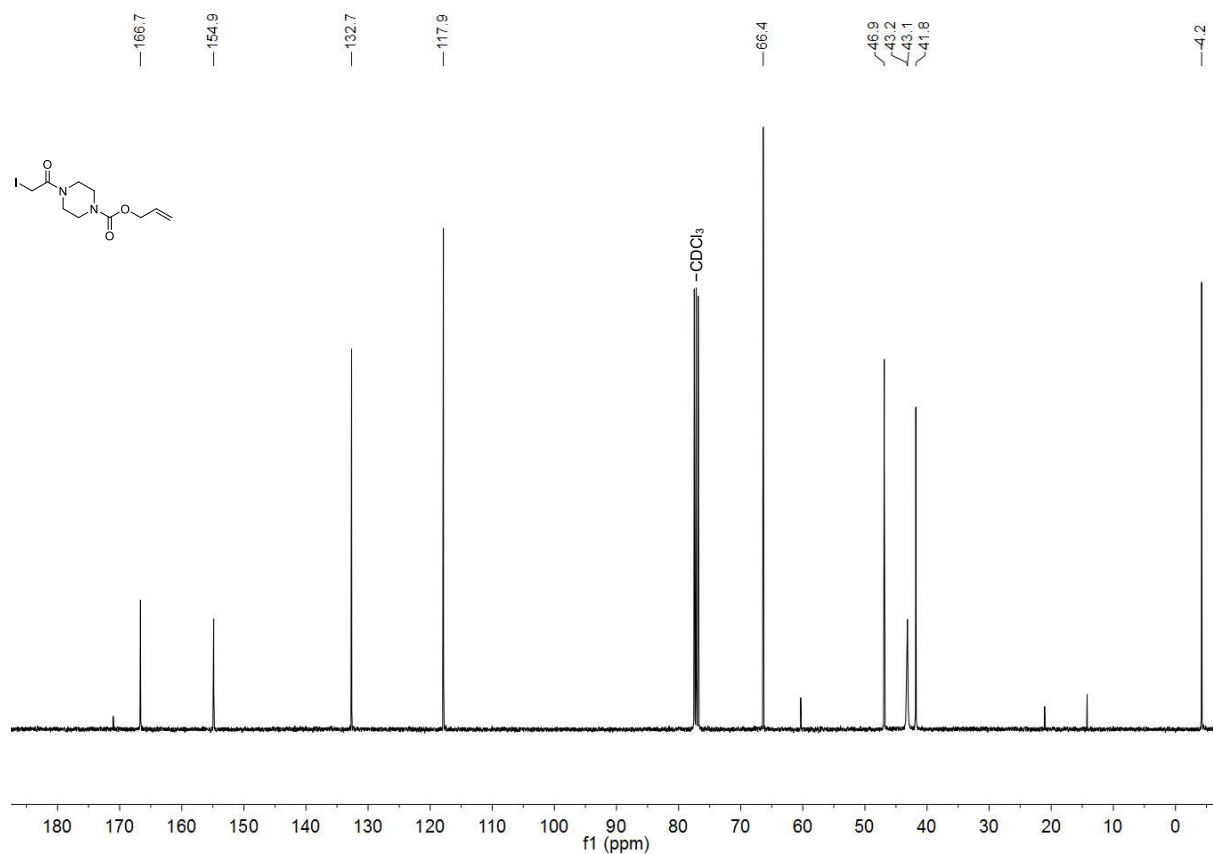

<sup>13</sup>C NMR (100.62 MHz, 300 K, CDCl<sub>3</sub>)

# Fidaxomicin Piperazine with alloc Protecting Group

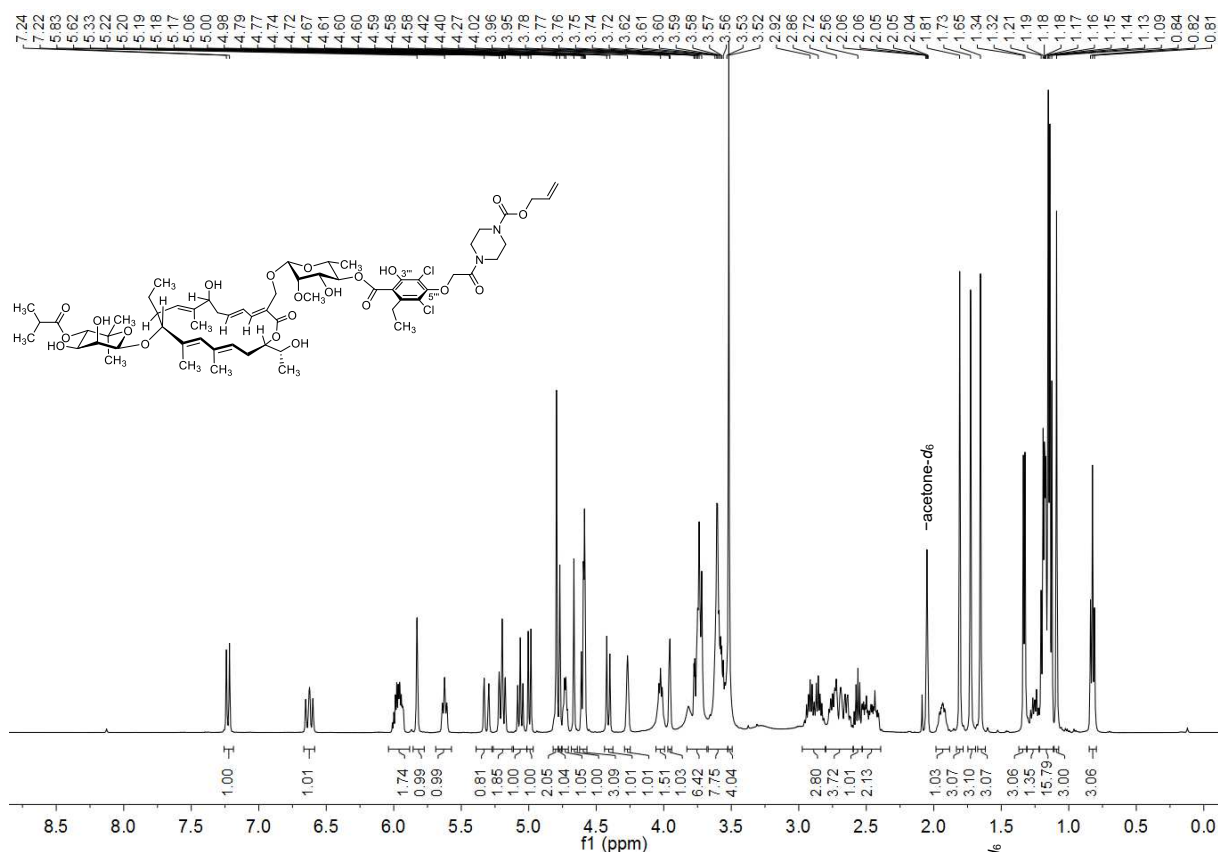

## <sup>13</sup>C NMR (125.77 MHz, 300 K, acetone-d<sub>6</sub>)

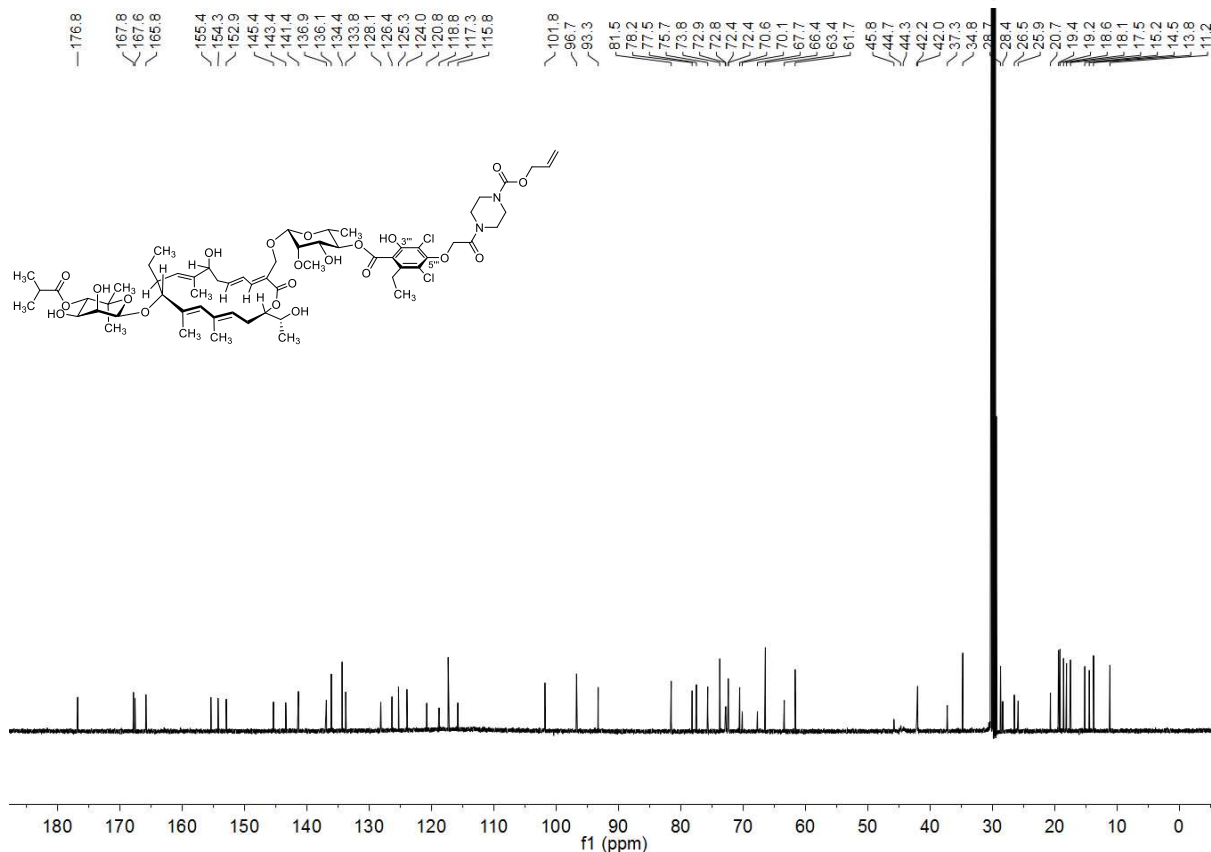

## <sup>13</sup>C NMR (125.77 MHz, 300 K, acetone-d<sub>6</sub>)

# Fidaxomicin Di(piperazine) with alloc Protecting Group

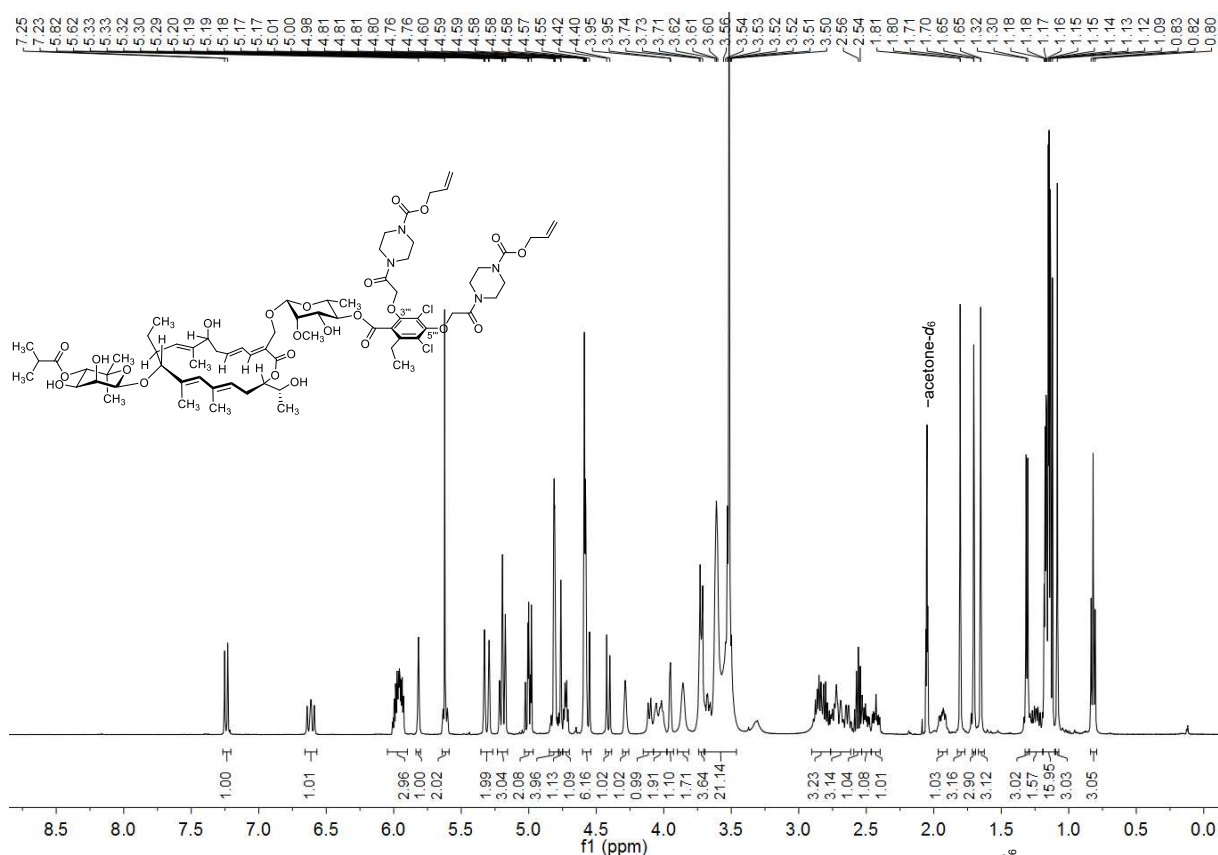

# <sup>13</sup>C NMR (125.80 MHz, 296 K, acetone-*d*<sub>6</sub>)

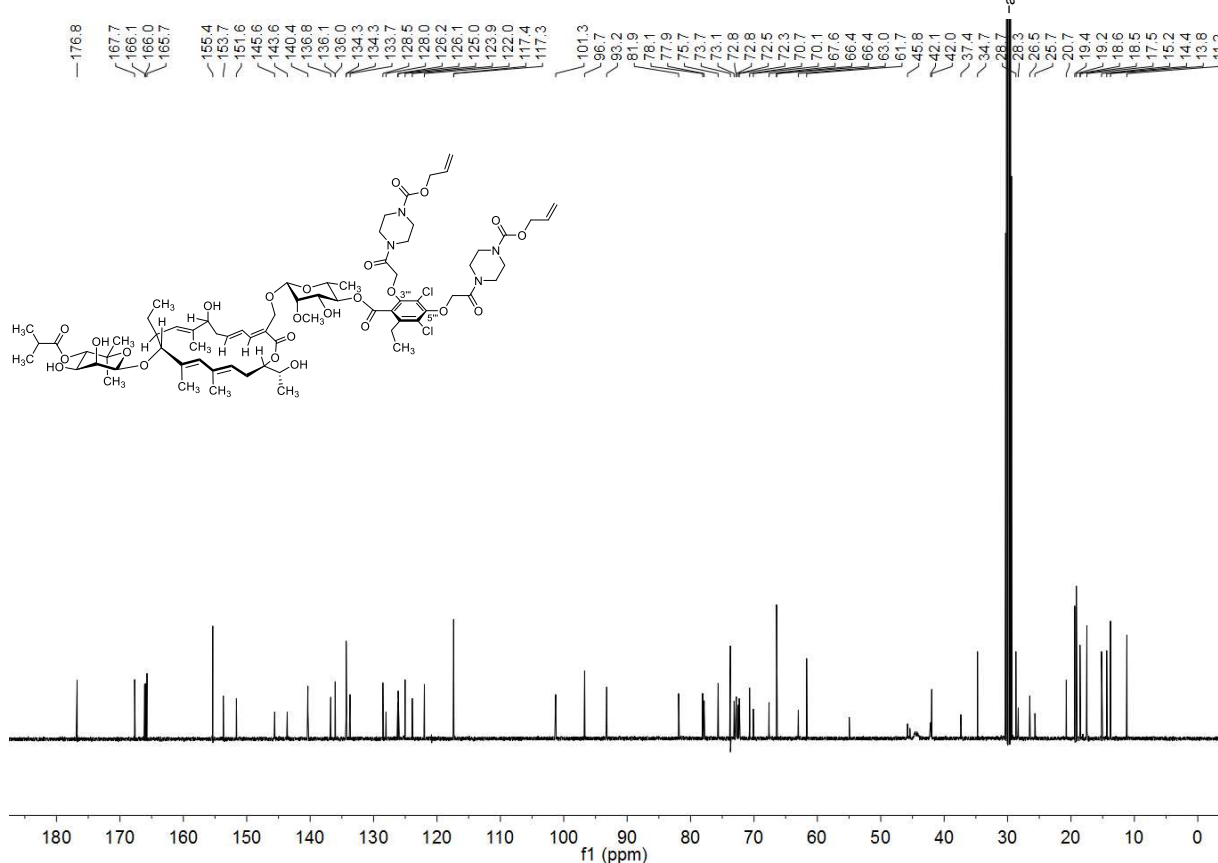

# Fidaxomicin Piperazine (5a)

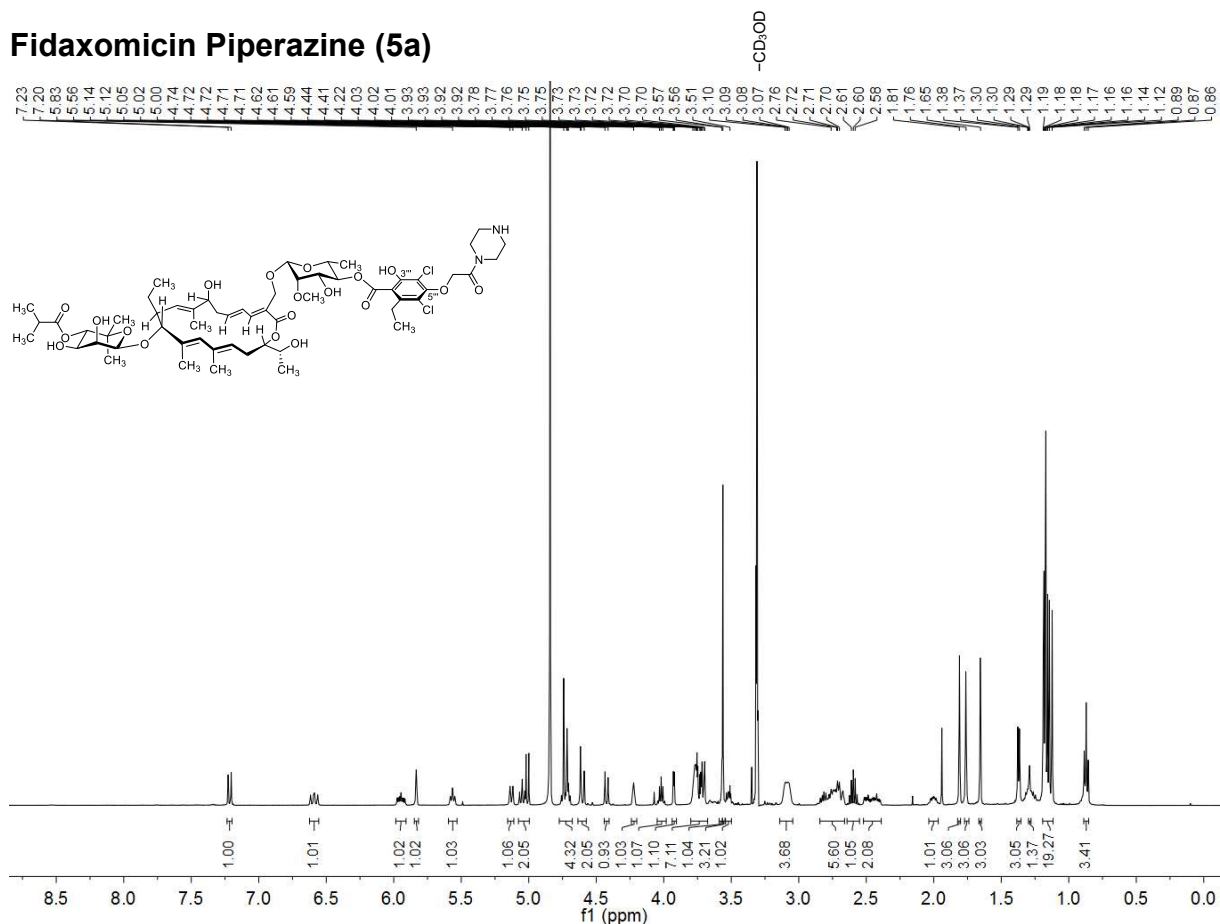

# <sup>13</sup>C NMR (125.80 MHz, 300 K, D<sub>3</sub>CO)

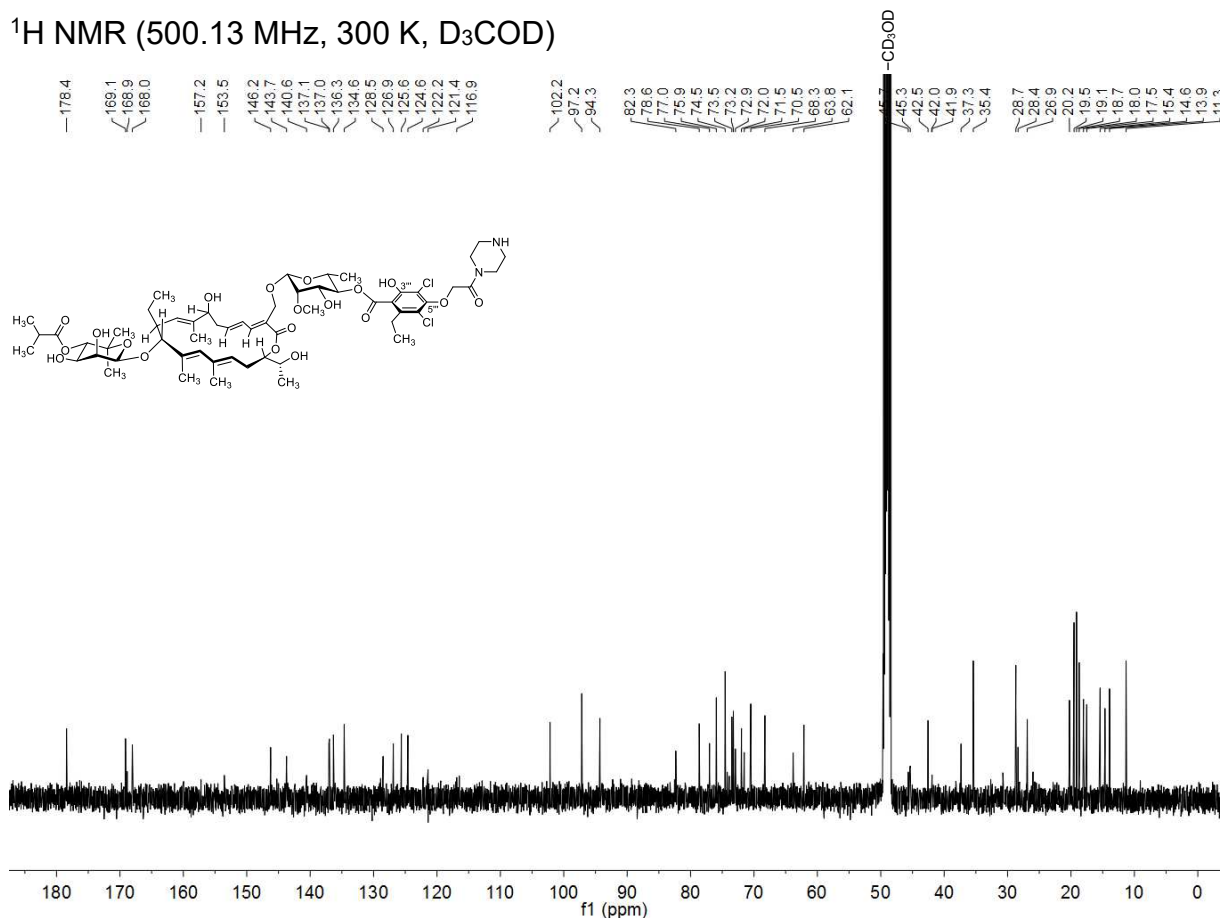

# <sup>13</sup>C NMR (125.80 MHz, 300 K, D<sub>3</sub>CO)

### Fidaxomicin Dipiperazine (5b)

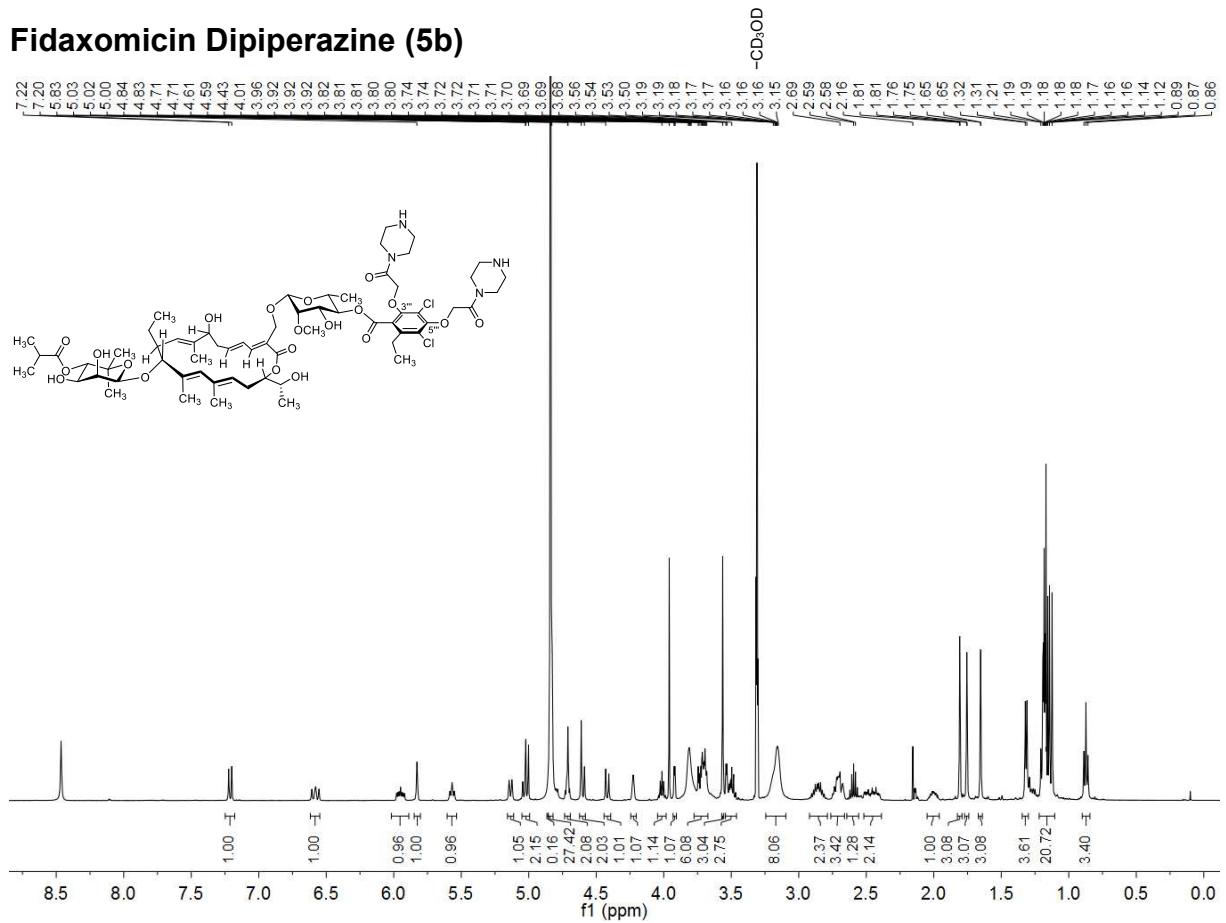

### <sup>13</sup>C NMR (125.80 MHz, 300 K, D<sub>3</sub>CO)

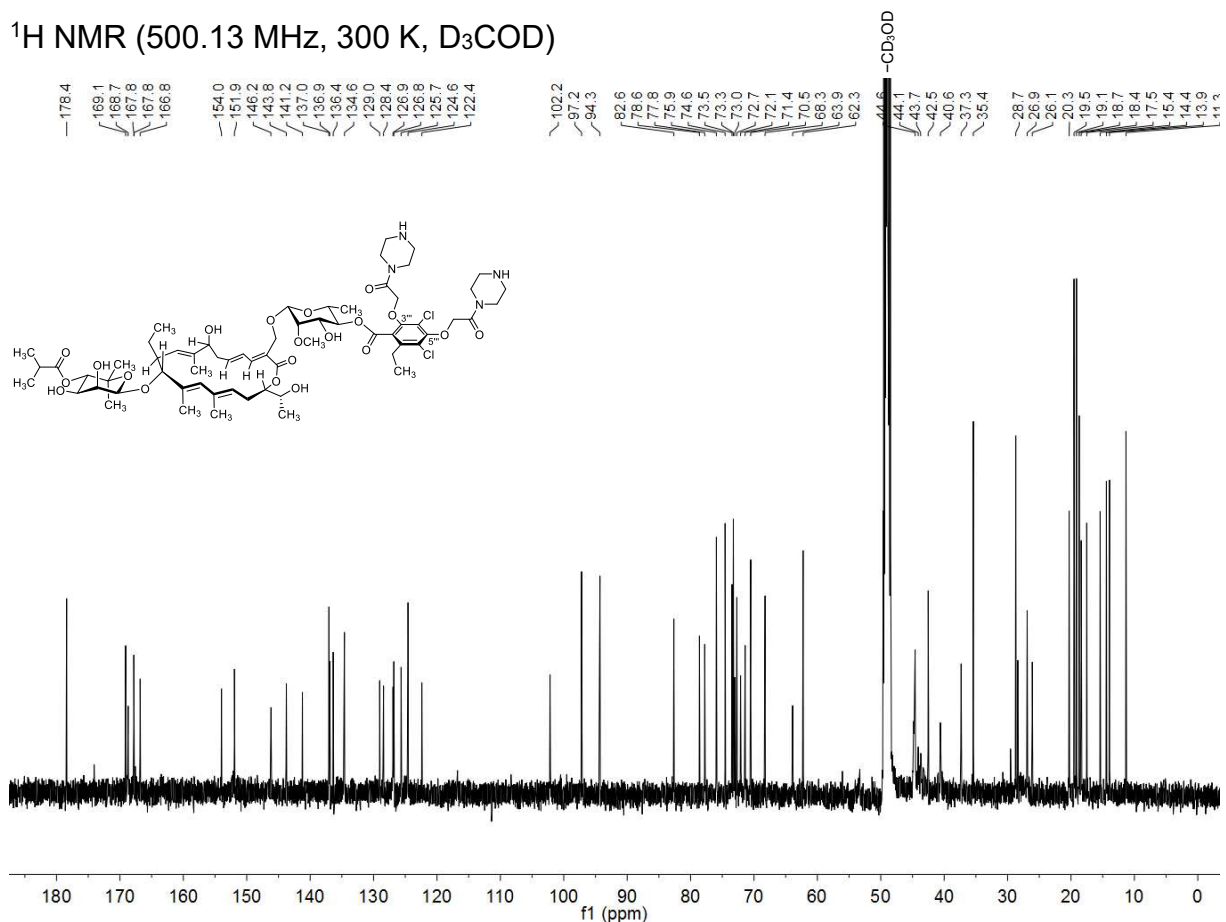

### <sup>13</sup>C NMR (125.80 MHz, 300 K, D<sub>3</sub>CO)

# 1-(4-Hydroxypiperidin-1-yl)-2-iodoethan-1-one

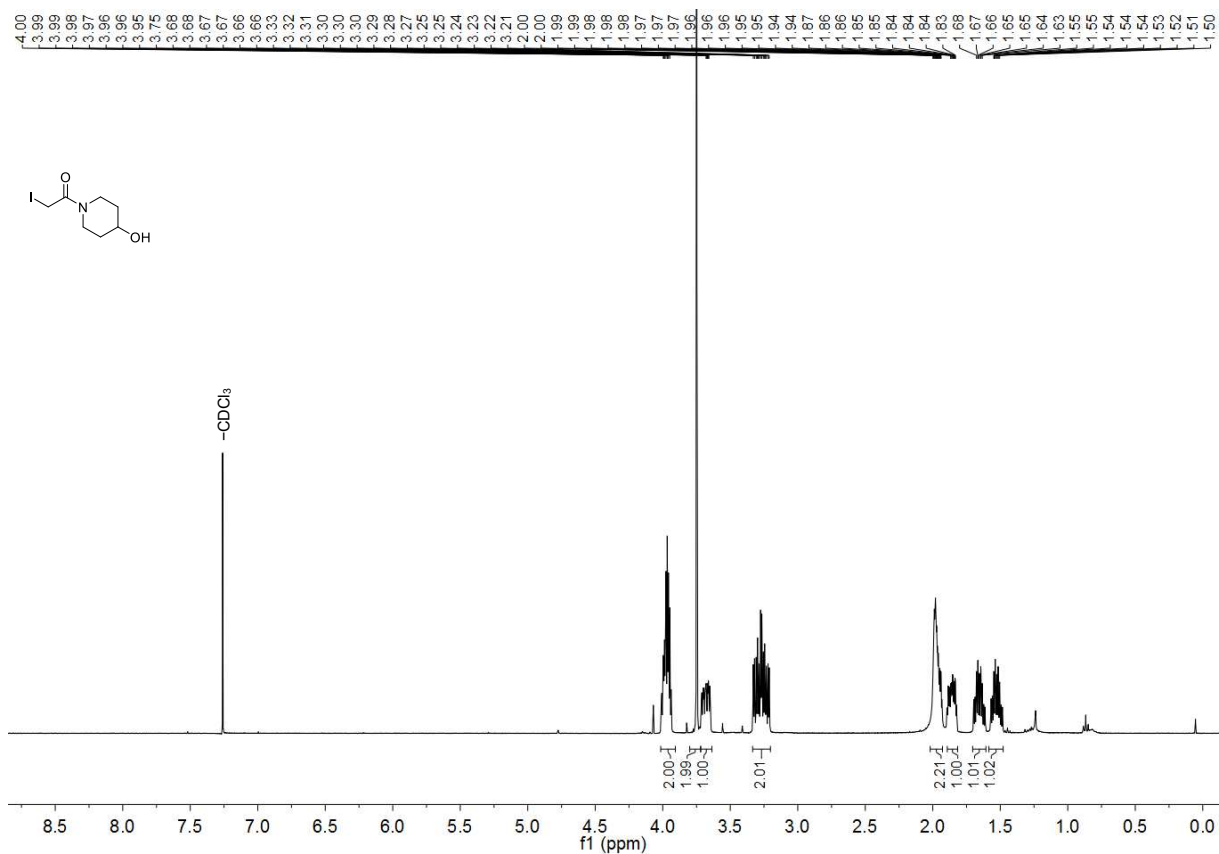

## <sup>1</sup>H NMR (400.13 MHz, 297 K, CDCl<sub>3</sub>)

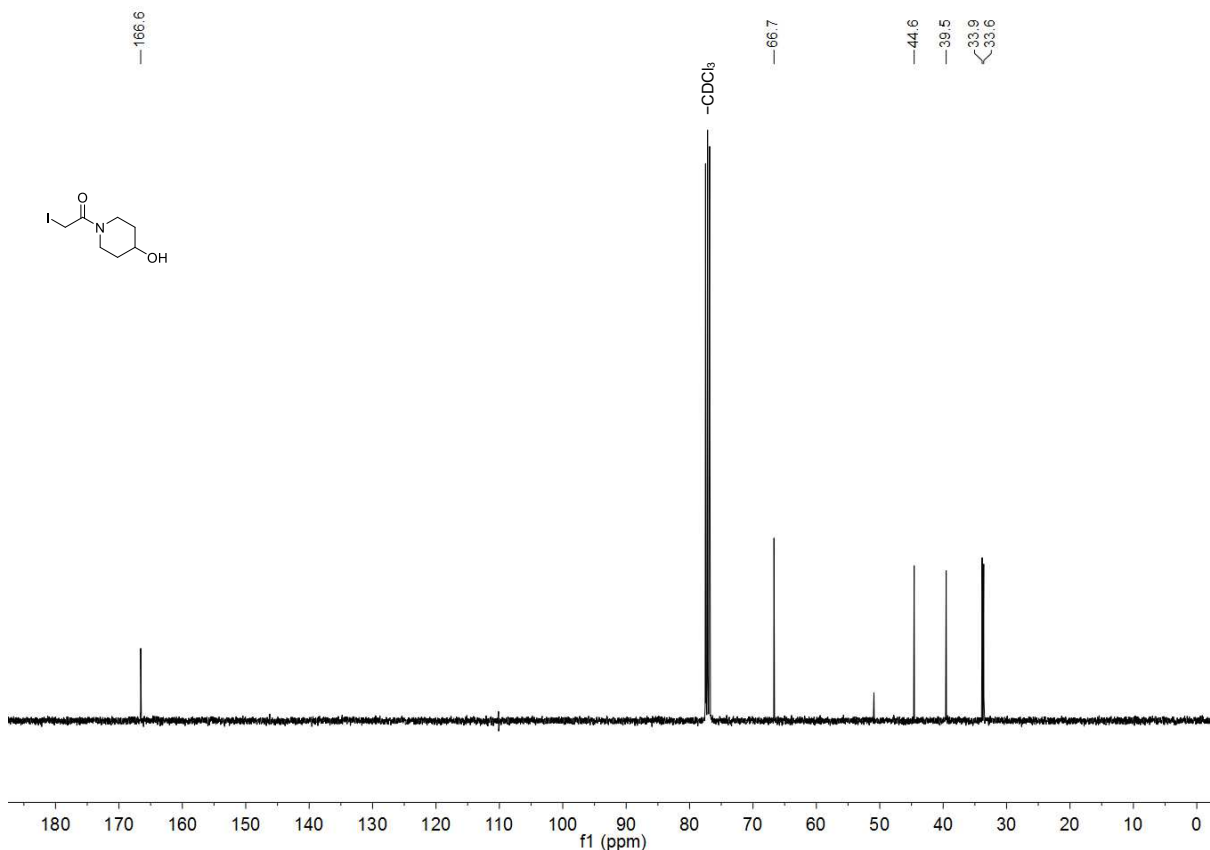

## <sup>13</sup>C NMR (100.62 MHz, 300 K, CDCl<sub>3</sub>)



# Fidaxomicin Piperidin-4-ol (6a)

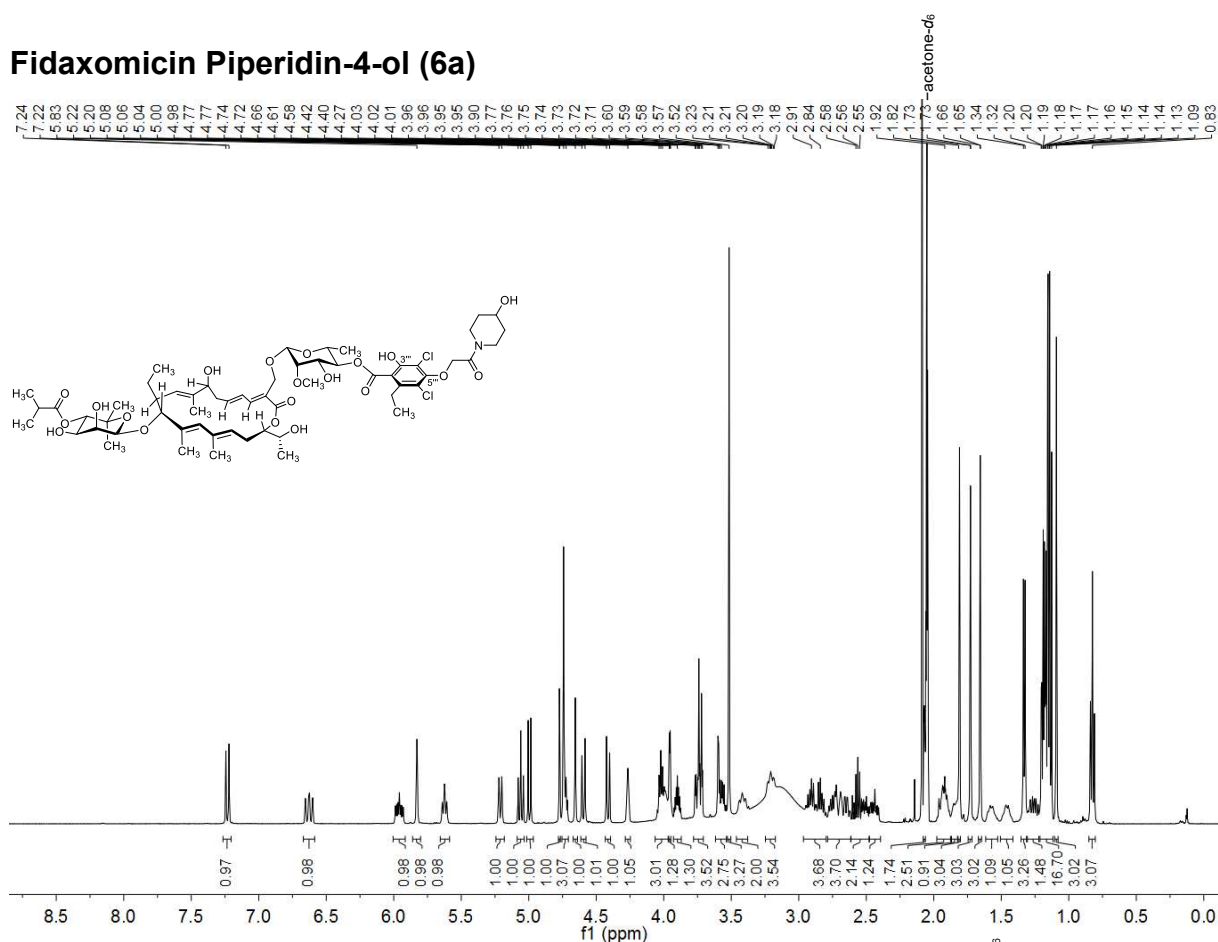

# <sup>13</sup>C NMR (125.81 MHz, 300 K, acetone-d<sub>6</sub>)

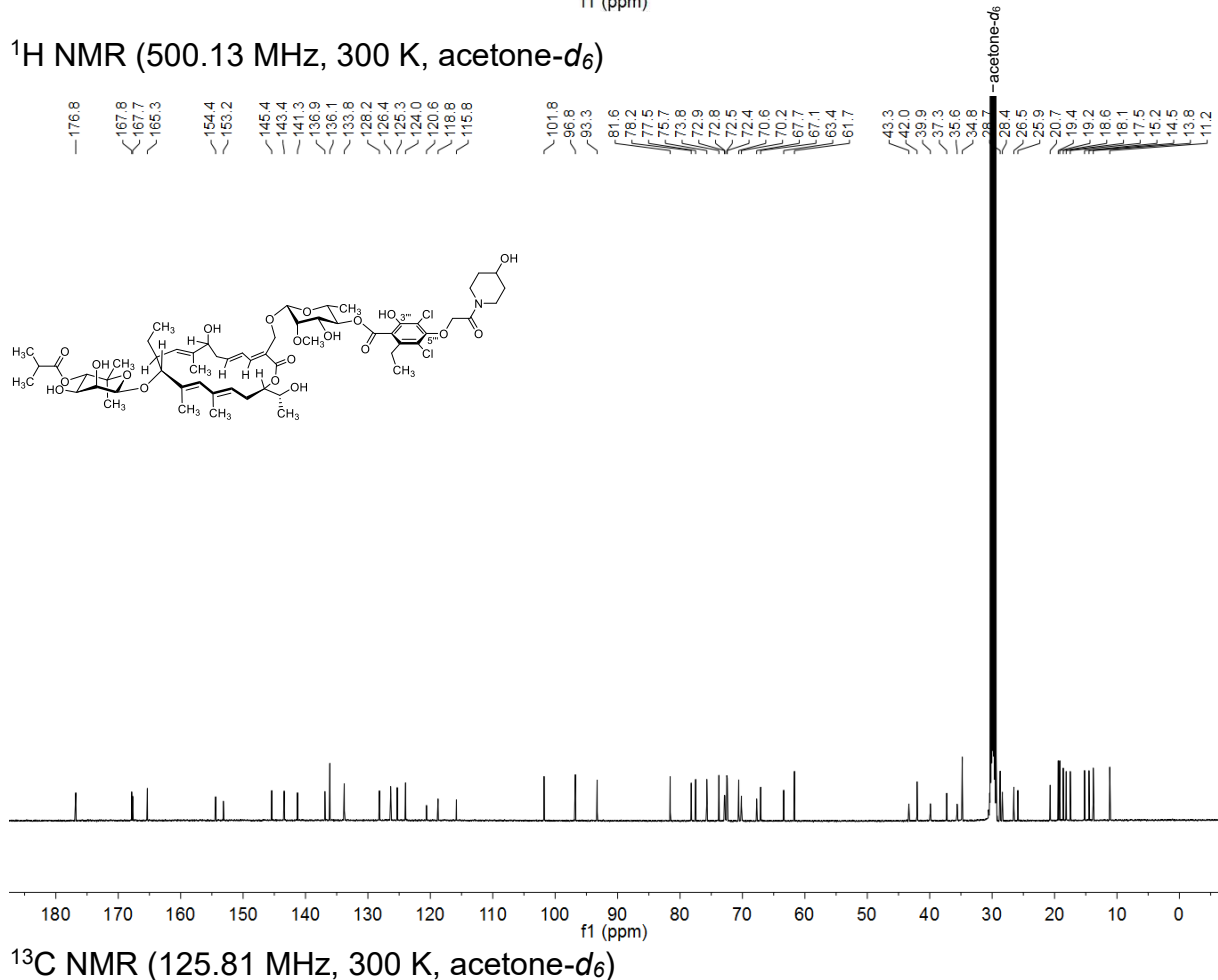

# Fidaxomicin Di(piperidin-4-ol) (6b)

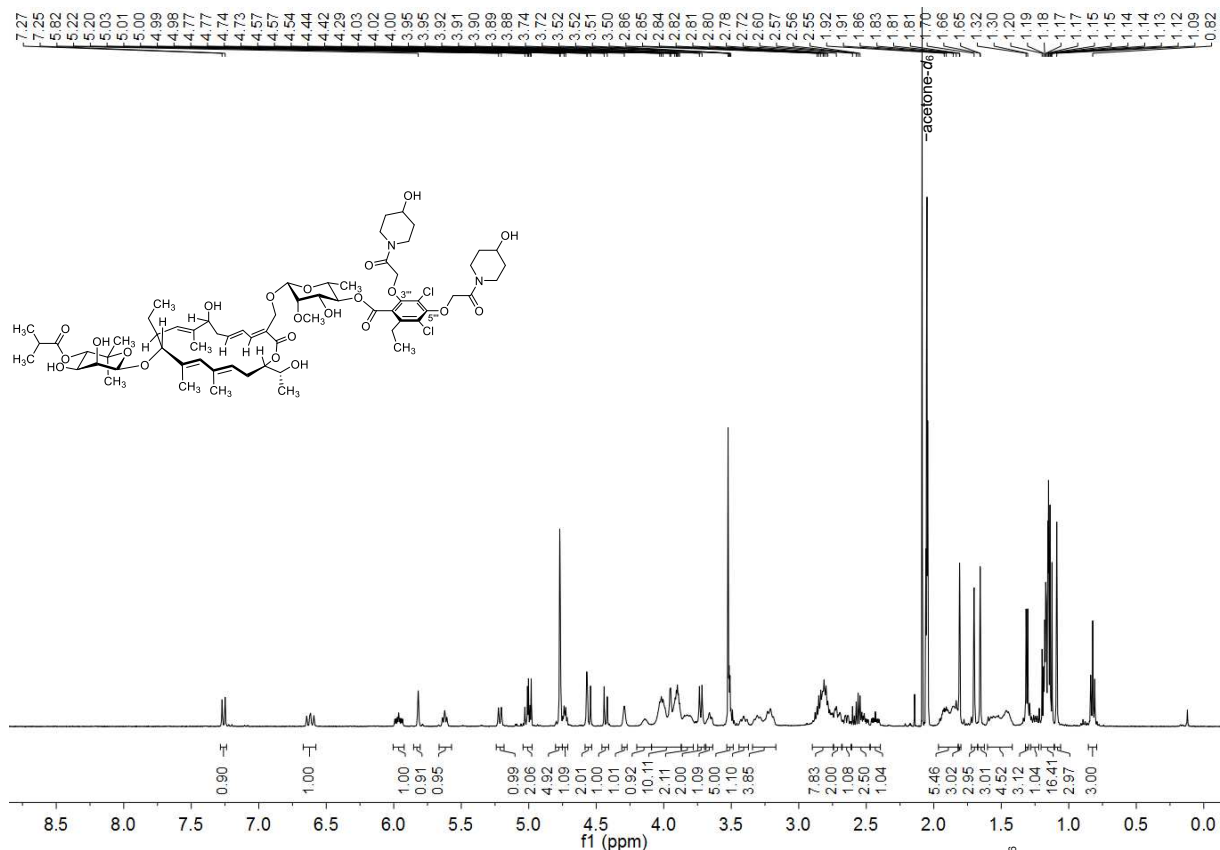

# <sup>13</sup>C NMR (125.81 MHz, 300 K, acetone-*d*<sub>6</sub>)

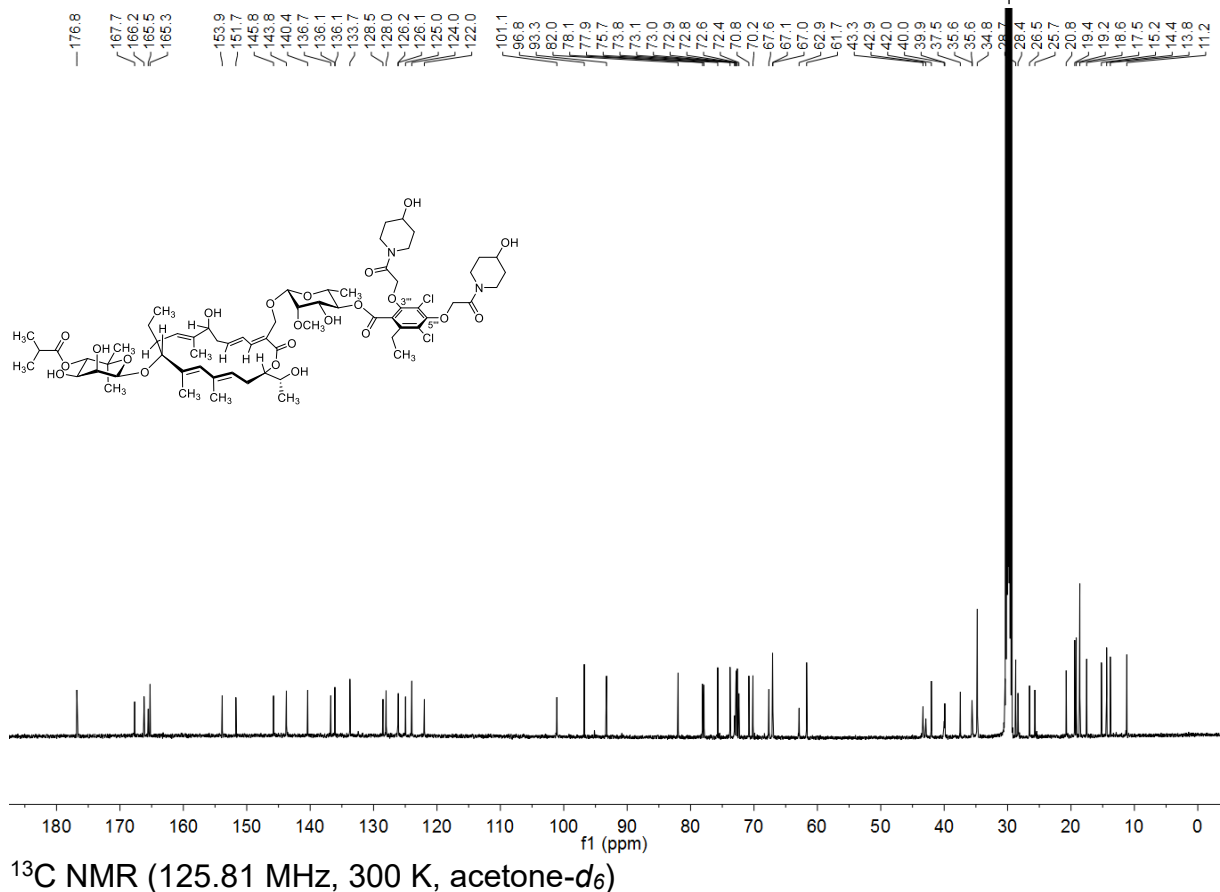

# 2,5,8,11,14,17-Hexaoxonadecan-19-yl 4-nitrobenzenesulfonate

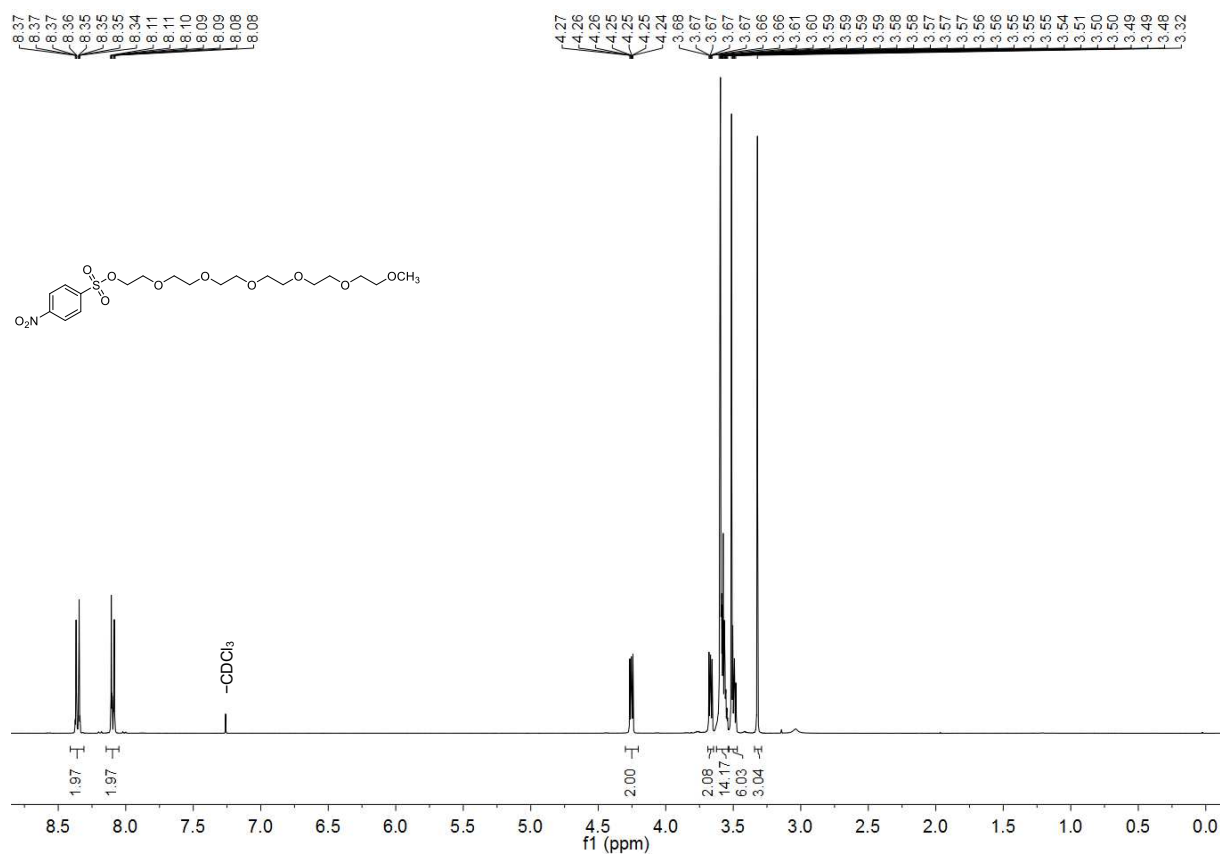

<sup>1</sup>H NMR (400.13 MHz, 300 K, CDCl<sub>3</sub>)

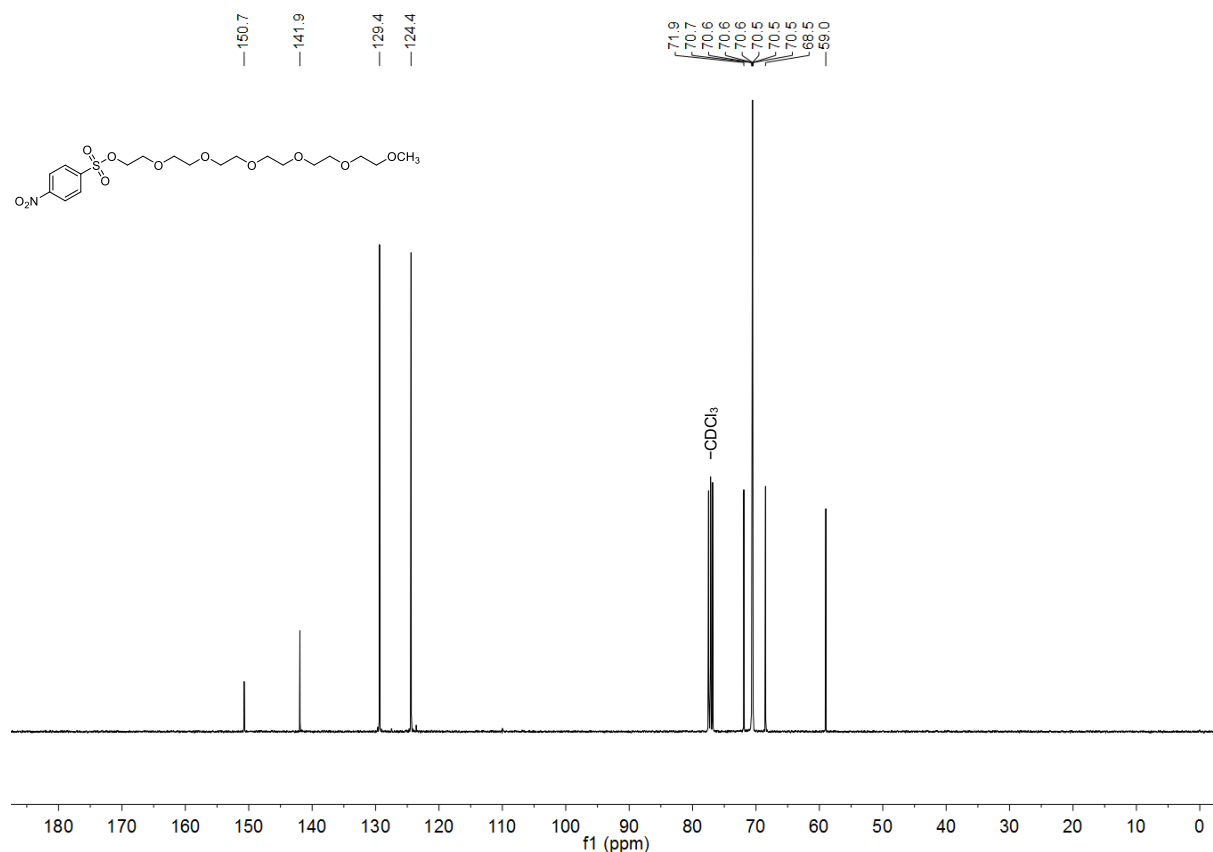

<sup>13</sup>C NMR (100.62 MHz, 300 K, CDCl<sub>3</sub>)

# HEG-fidaxomicin (7a)

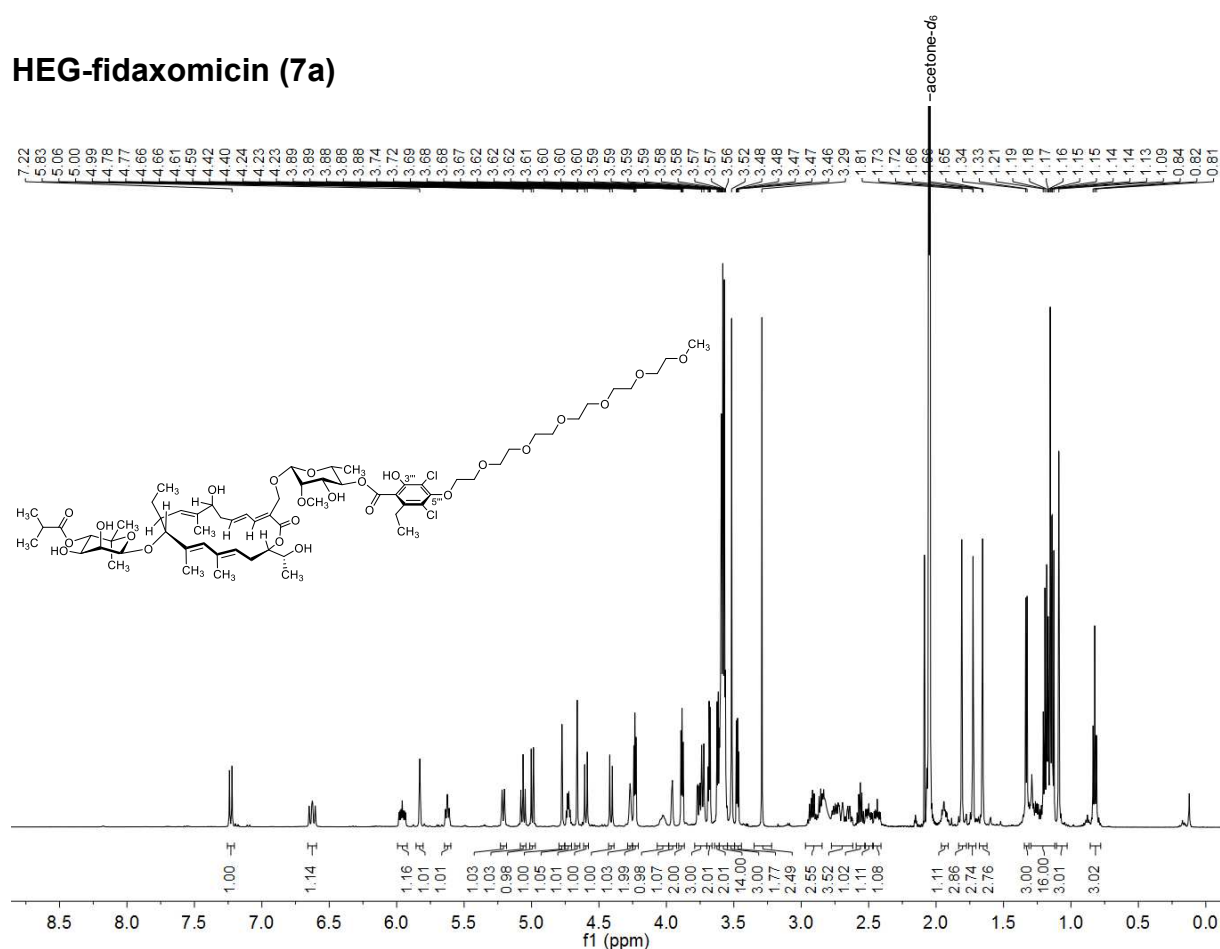

# <sup>13</sup>C NMR (150.94 MHz, 298 K, acetone-*d*<sub>6</sub>)

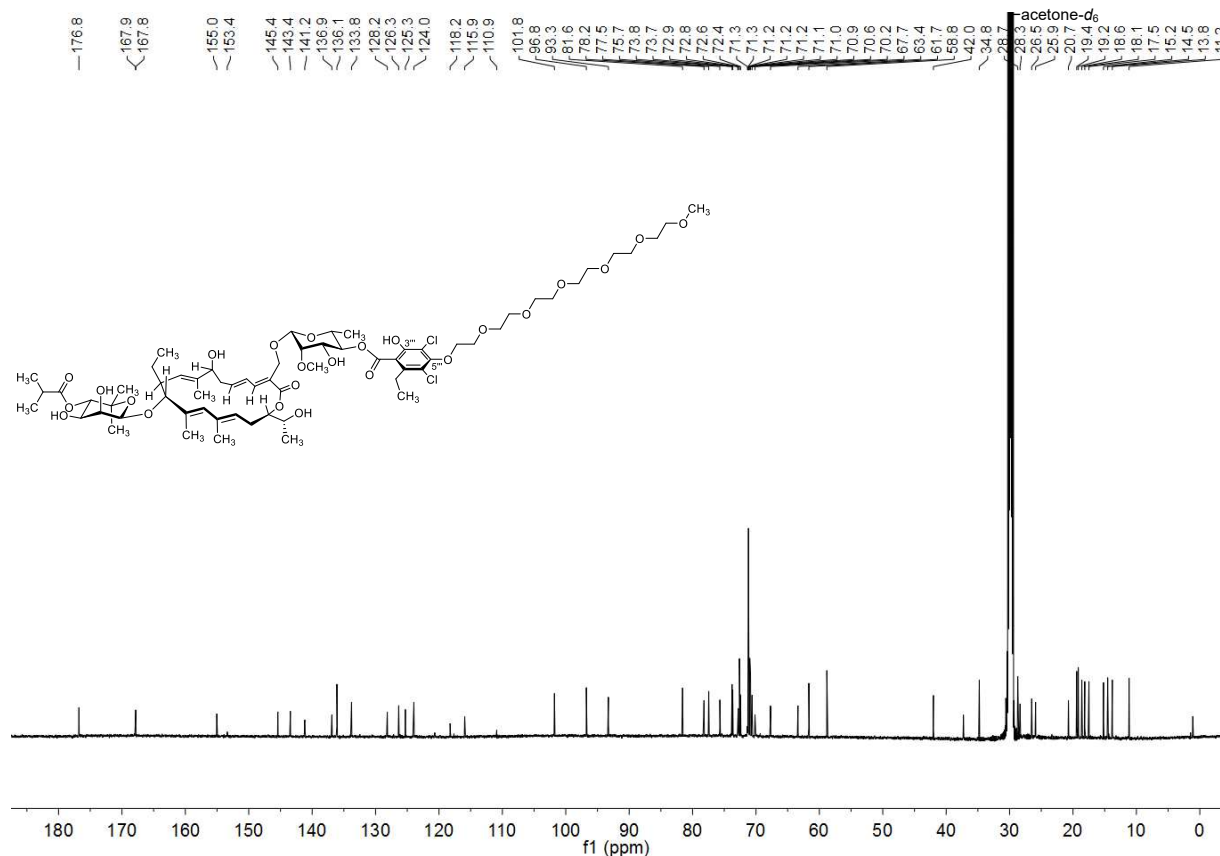

## Bis(HEG)-fidaxomicin (7b)

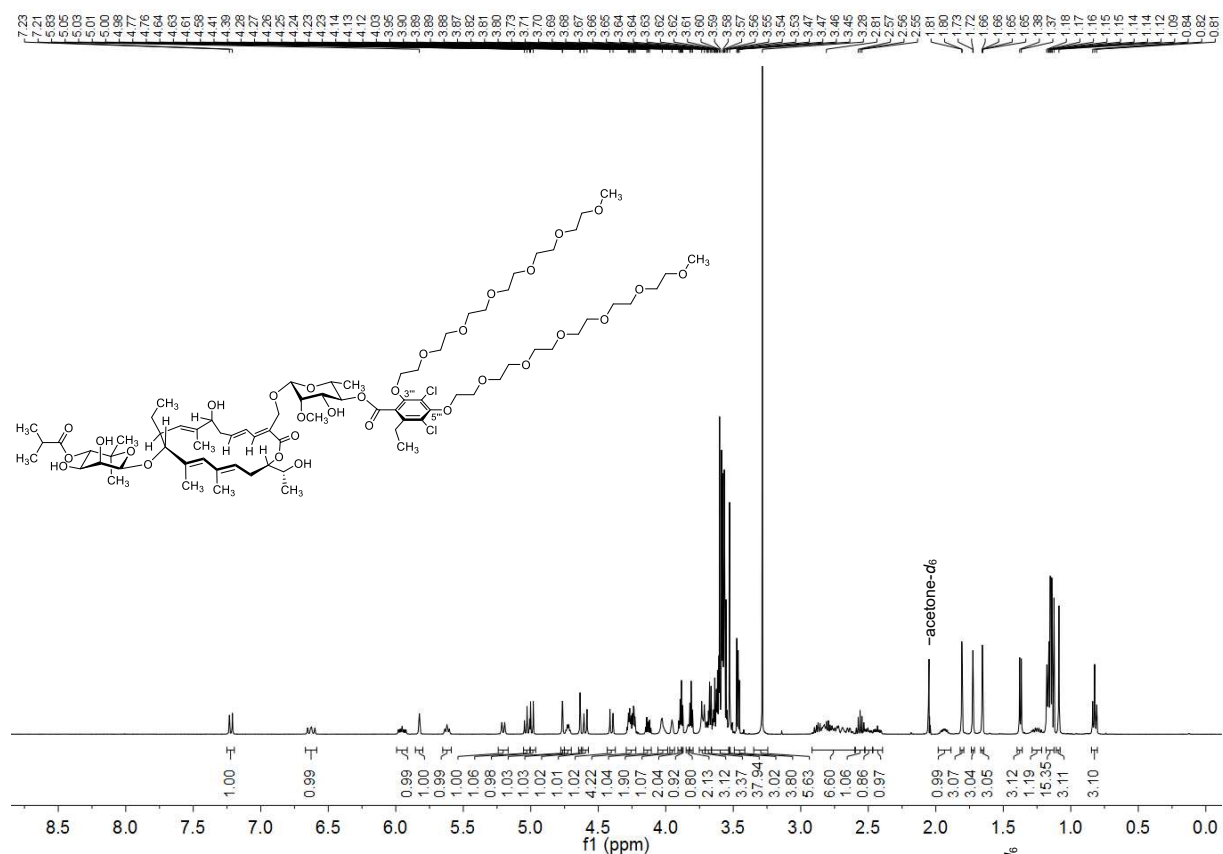

<sup>1</sup>H NMR (500.13 MHz, 298 K, acetone-d<sub>6</sub>)

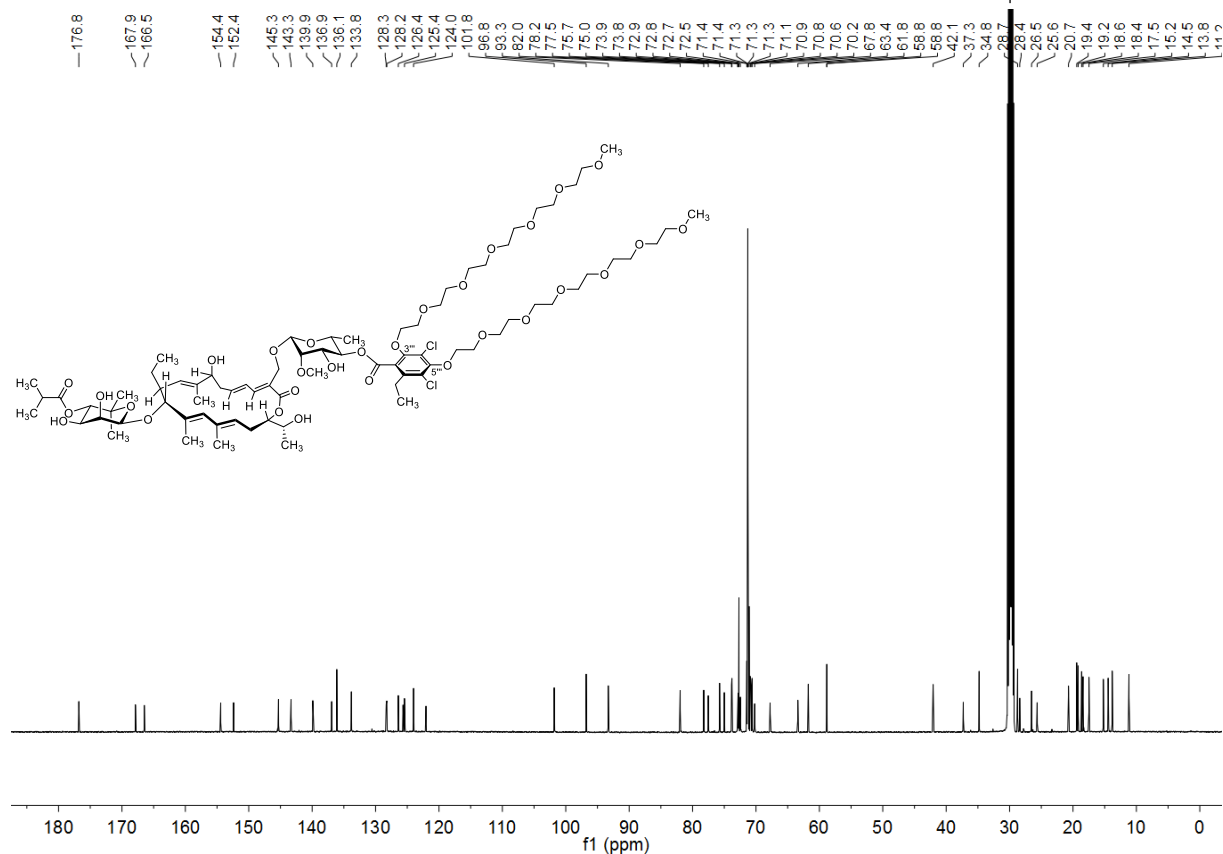

<sup>13</sup>C NMR (125.81 MHz, 303 K, acetone-d<sub>6</sub>)

# SuFEx1-Fidaxomicin (8a)

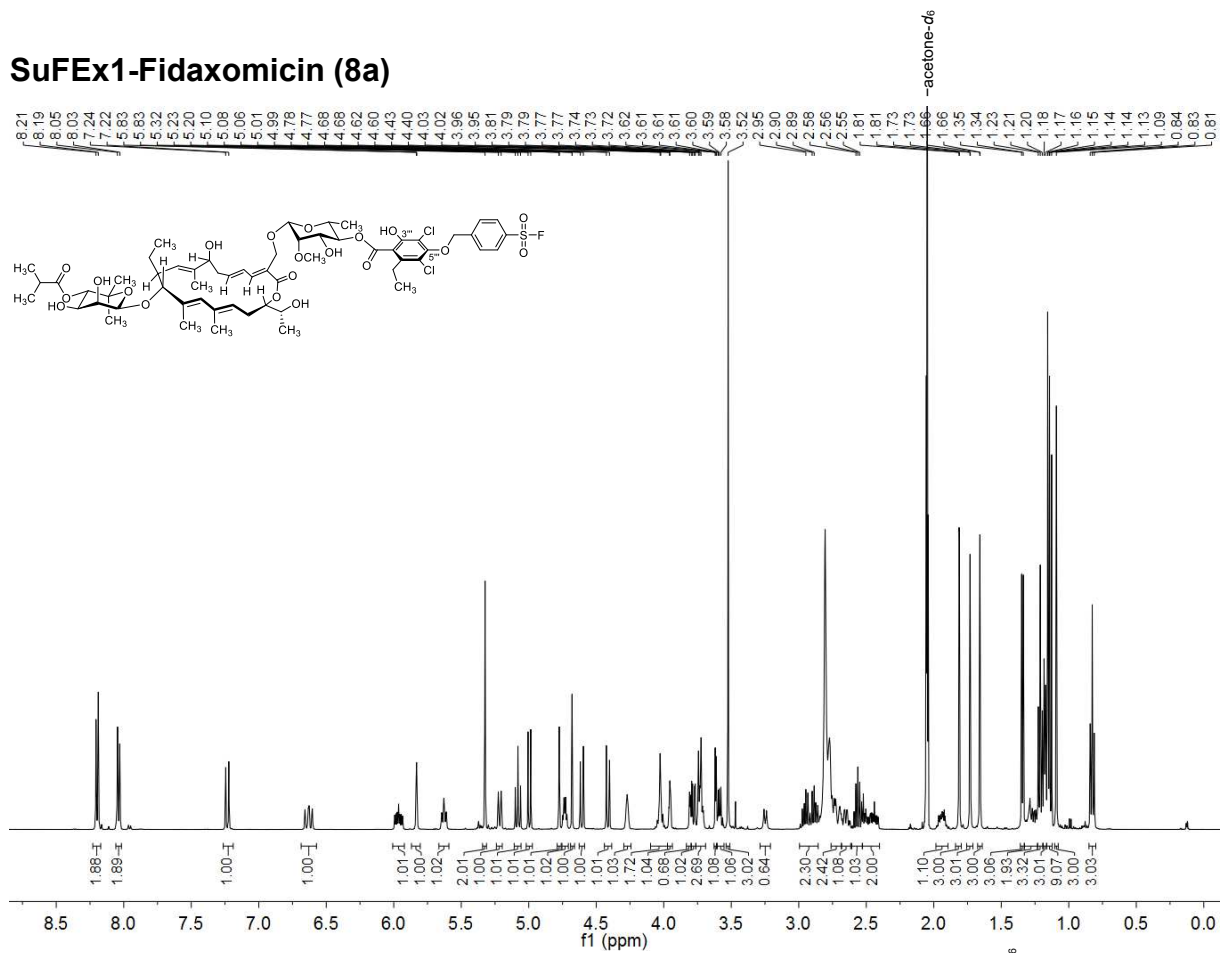

# <sup>13</sup>C NMR (125.81 MHz, 298 K, acetone-d<sub>6</sub>)

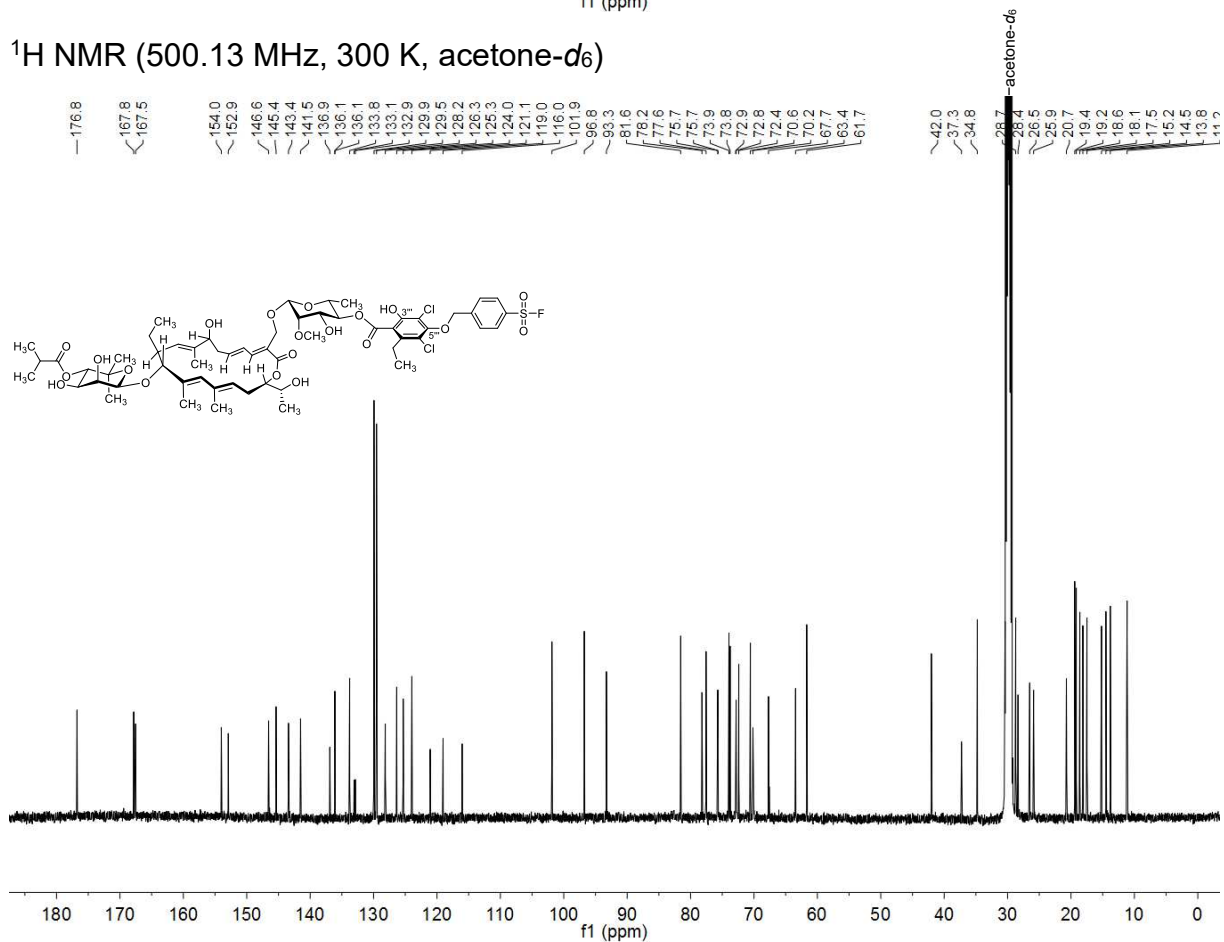

# <sup>13</sup>C NMR (125.81 MHz, 298 K, acetone-d<sub>6</sub>)

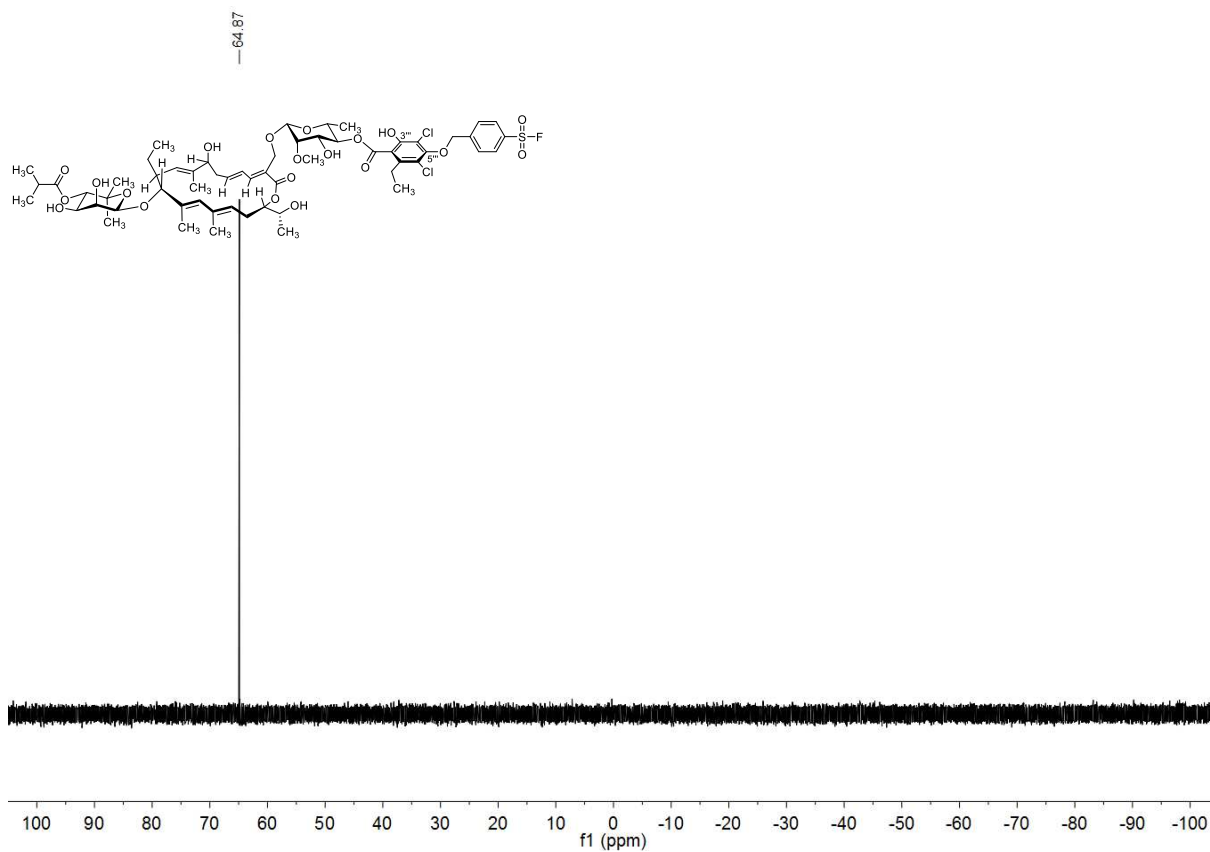

$^{19}\text{F}$  NMR (376.5 MHz, 300 K, acetone- $d_6$ )

# SuFEx2-Fidaxomicin (8b)

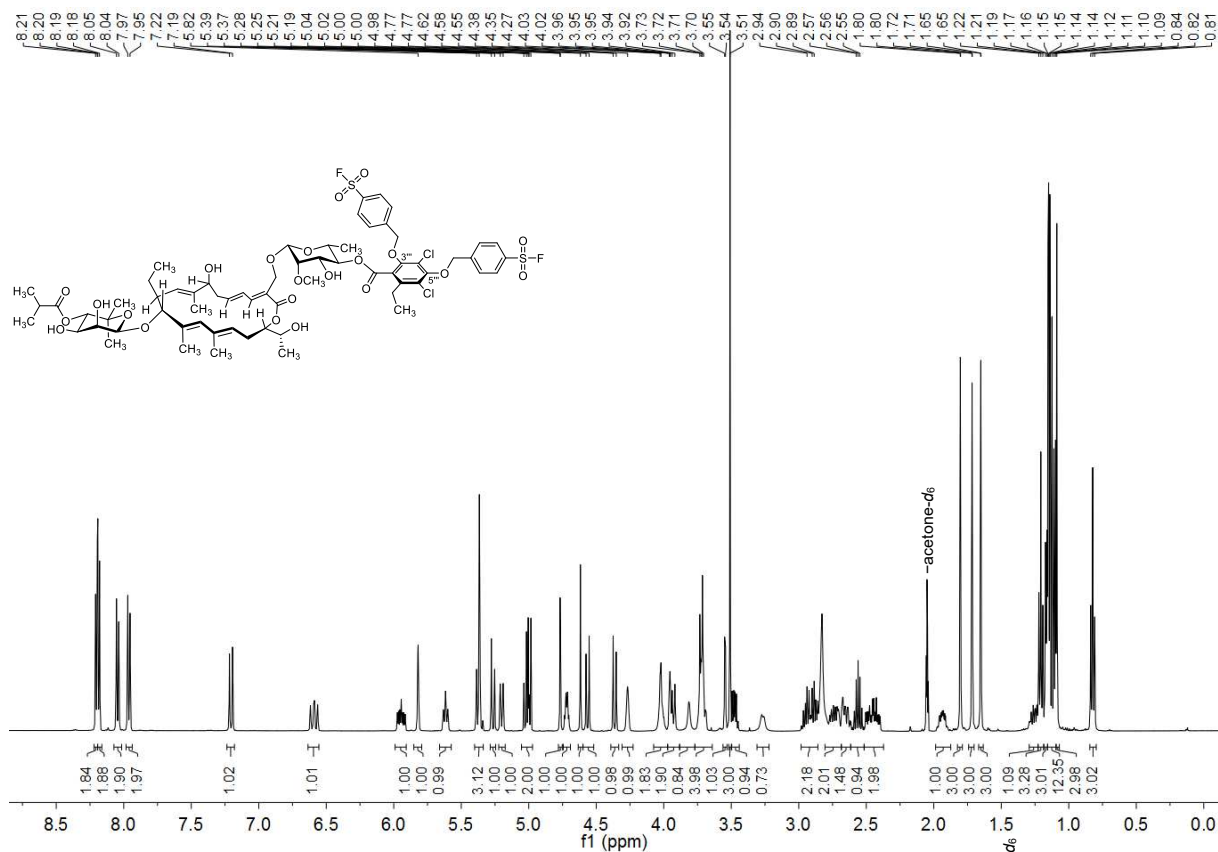

# <sup>13</sup>C NMR (125.77 MHz, 300 K, acetone-*d*<sub>6</sub>)

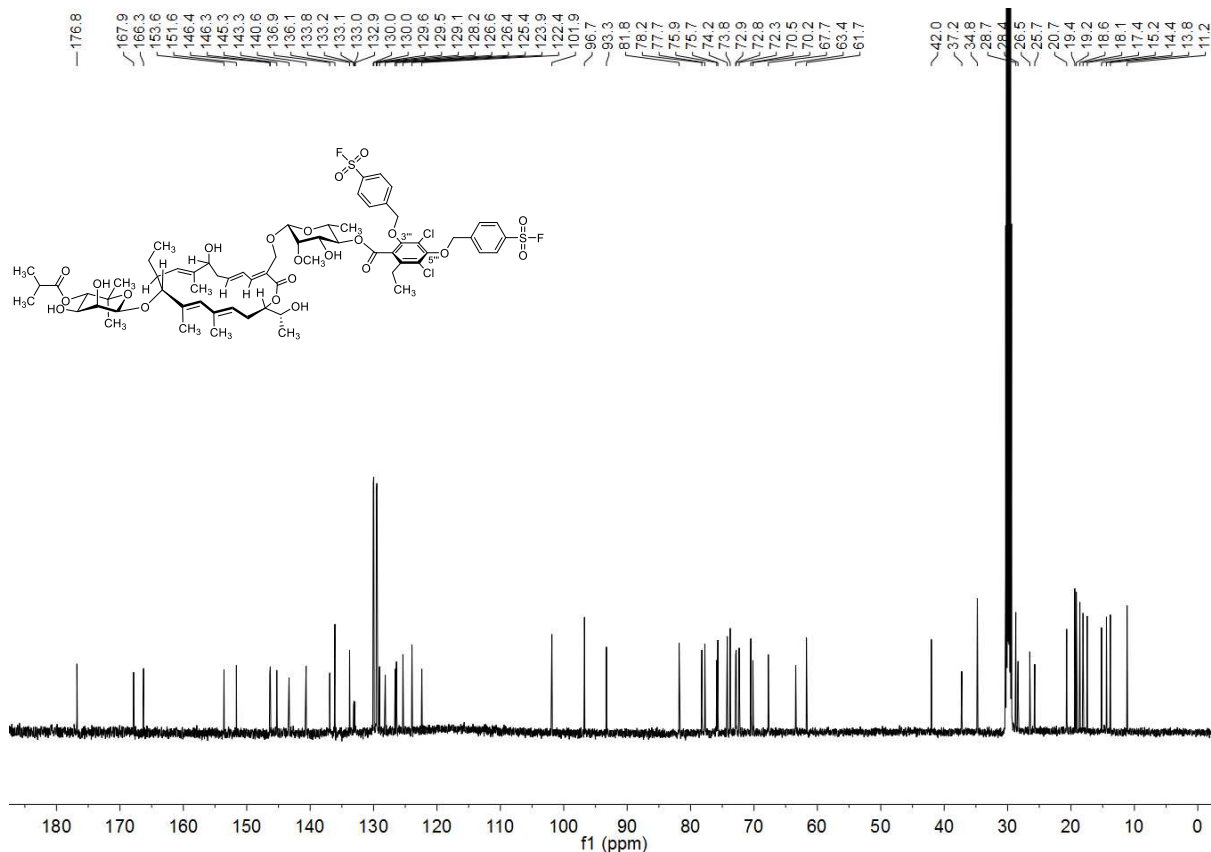

# <sup>13</sup>C NMR (125.77 MHz, 300 K, acetone-*d*<sub>6</sub>)



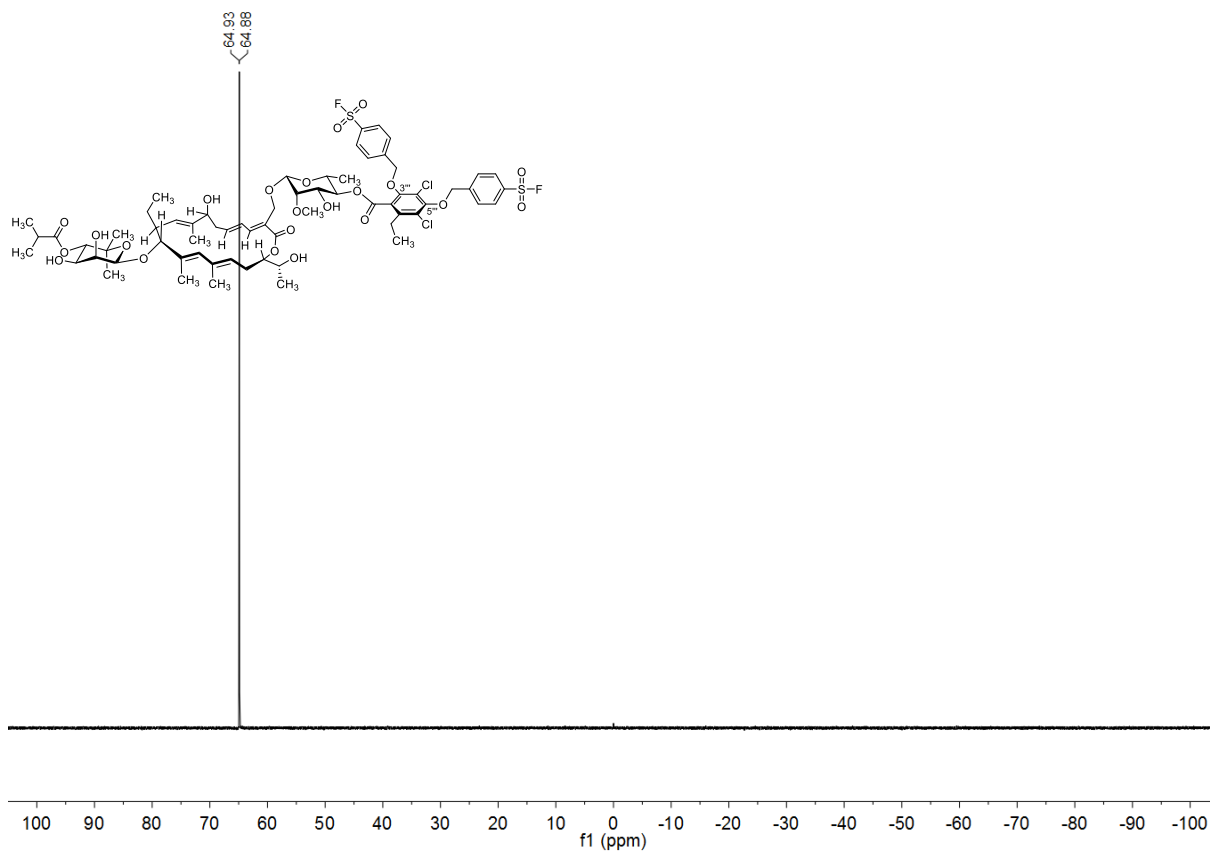

$^{19}\text{F}$  NMR (376.50 MHz, 300 K, acetone- $d_6$ )

### 3-Azidopropan-1-ol

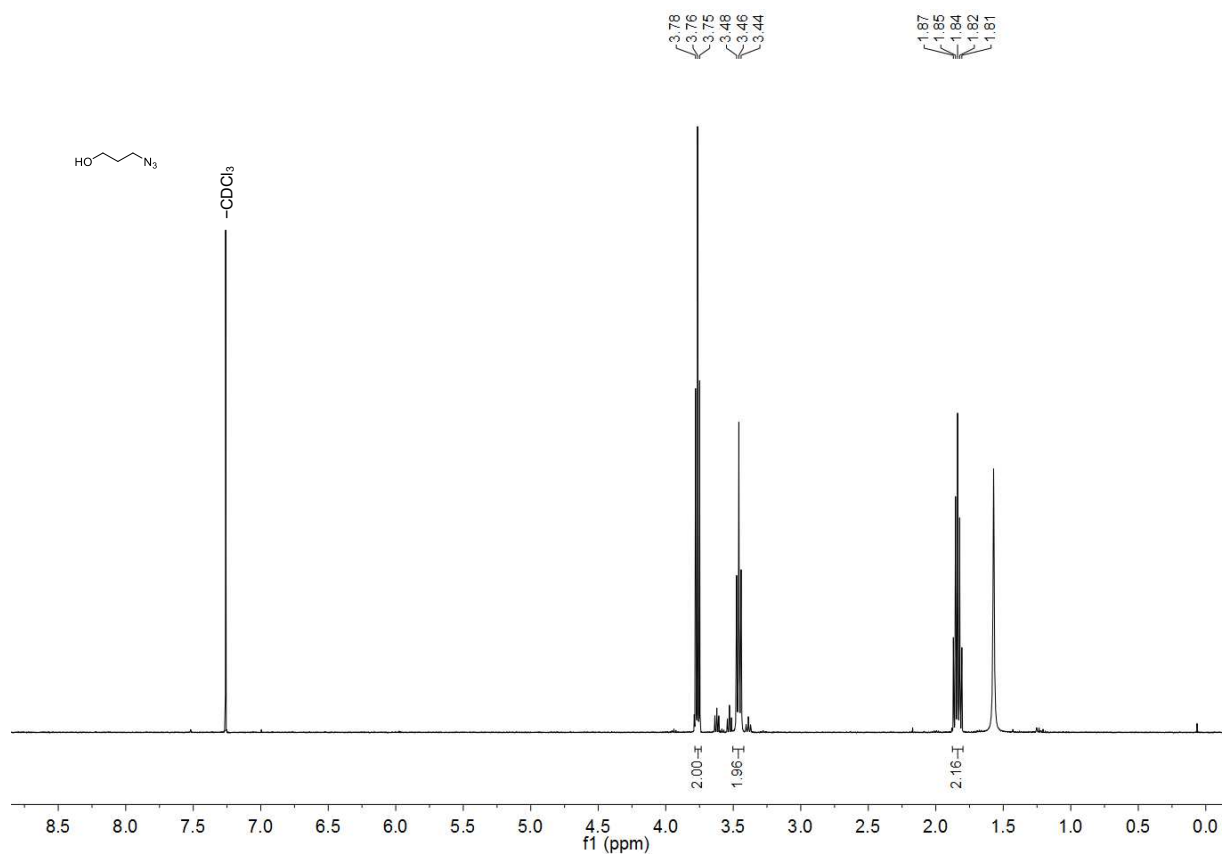

<sup>1</sup>H NMR (400.13 MHz, 294 K, CDCl<sub>3</sub>)

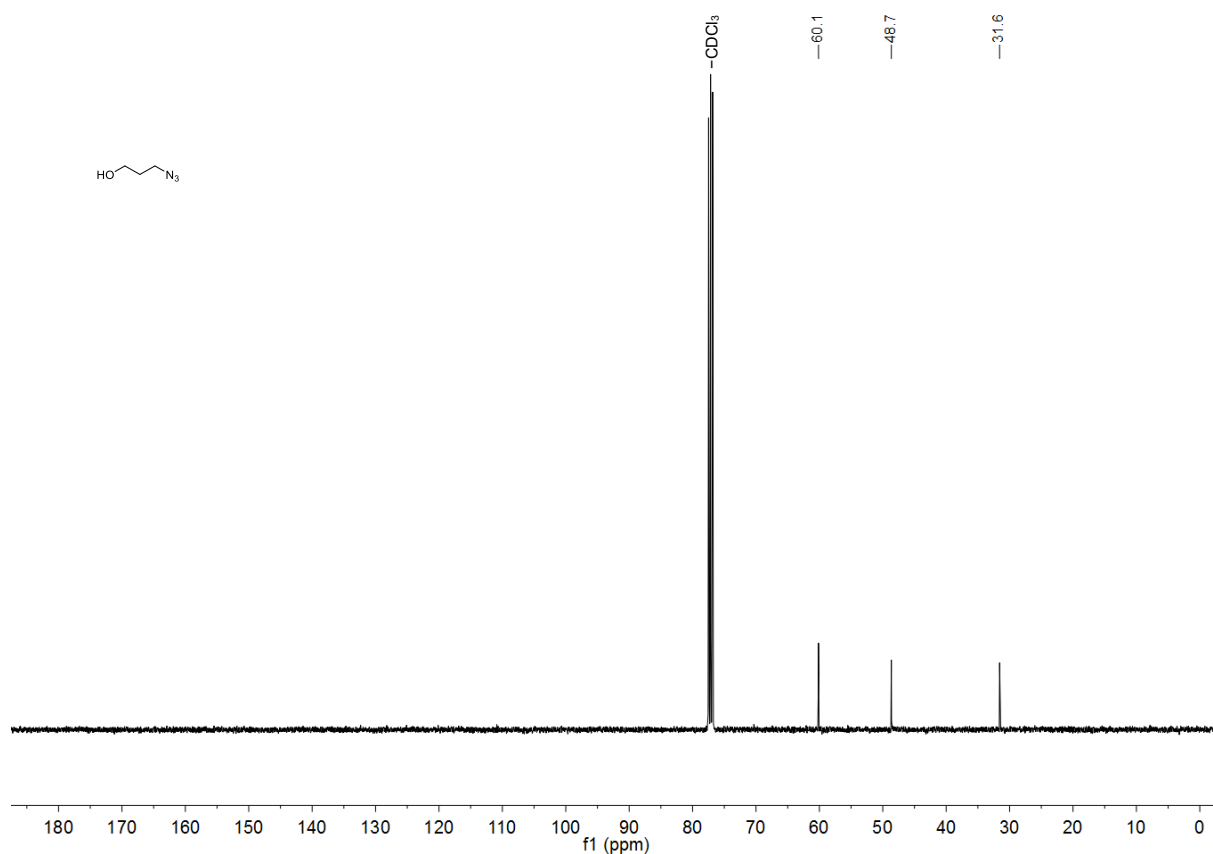

<sup>13</sup>C NMR (100.62 MHz, 294 K, CDCl<sub>3</sub>)

### 3-Azidopropyl 4-nitrobenzenesulfonate

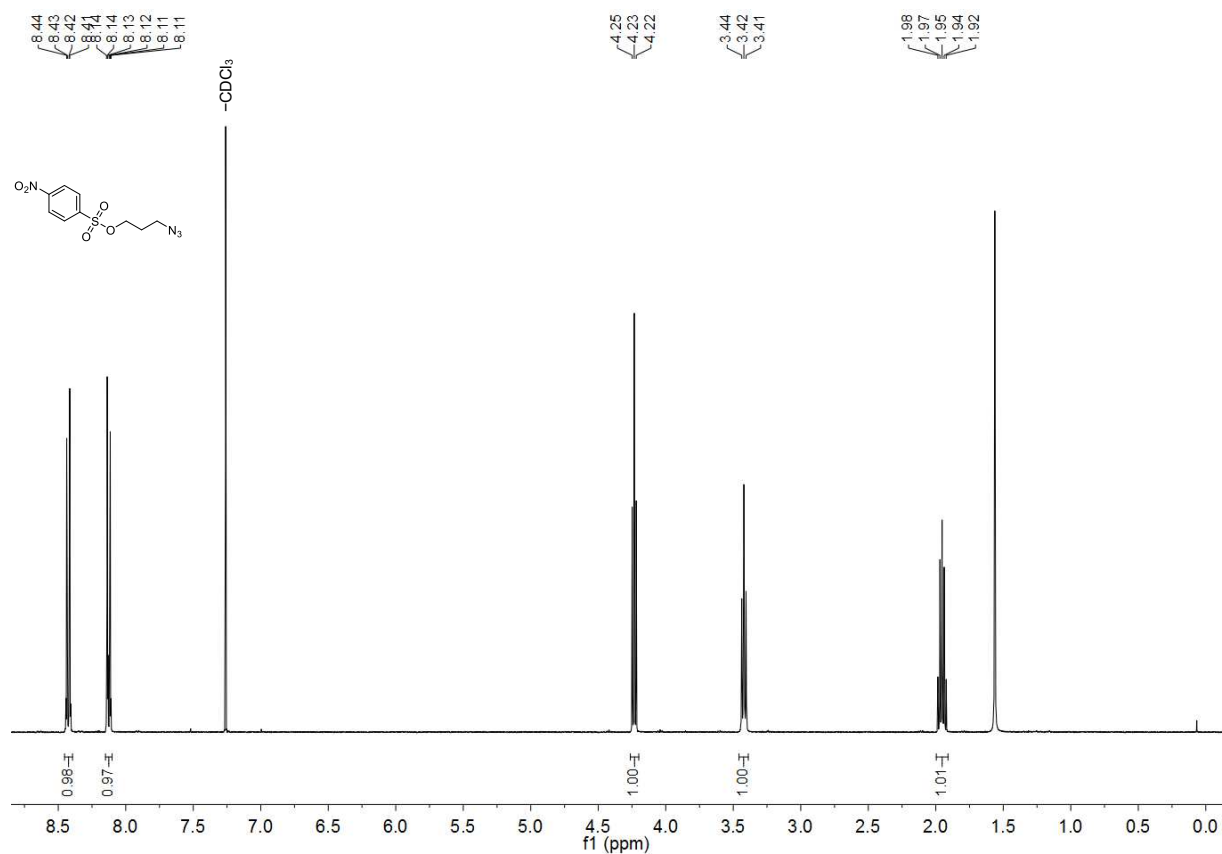

### <sup>13</sup>C NMR (100.62 MHz, 298 K, CDCl<sub>3</sub>)

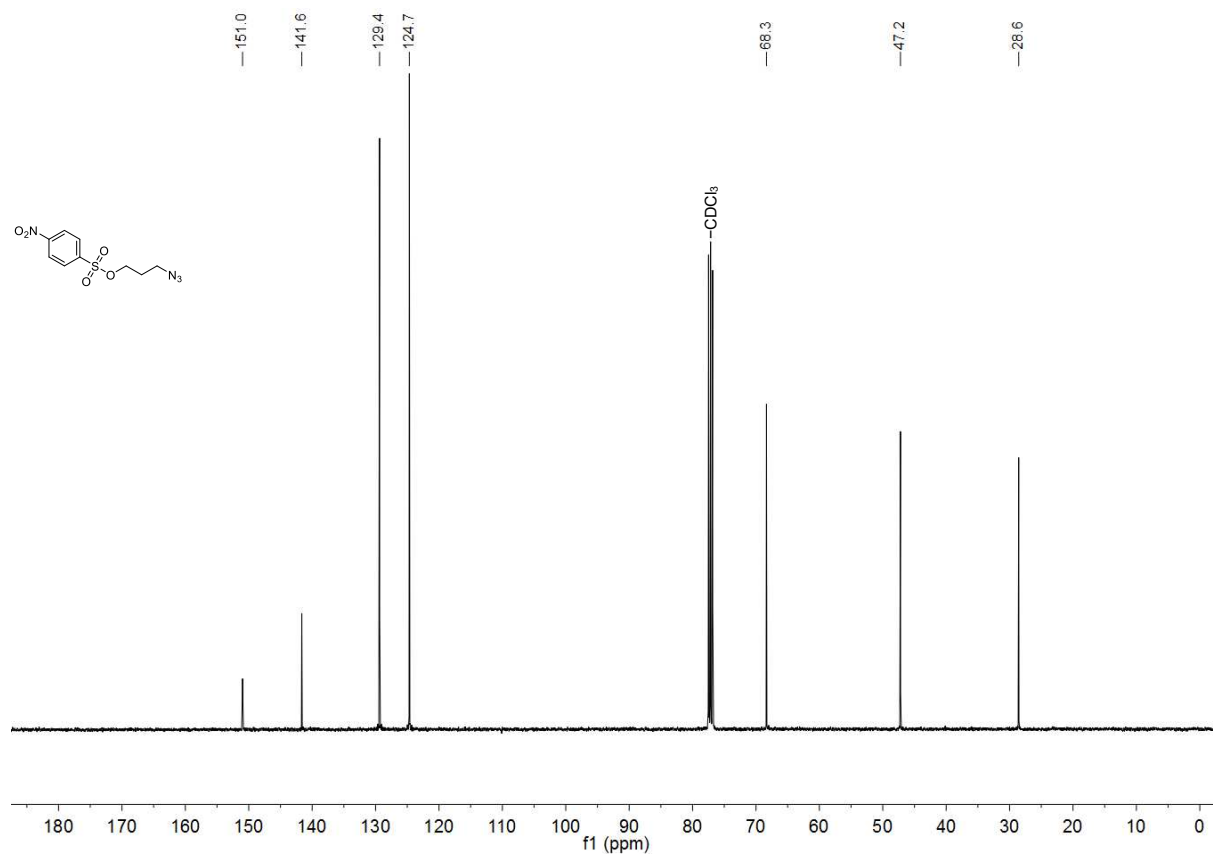

### <sup>13</sup>C NMR (100.62 MHz, 298 K, CDCl<sub>3</sub>)

# Mono(azidopropyl)fidaxomicin (10a)

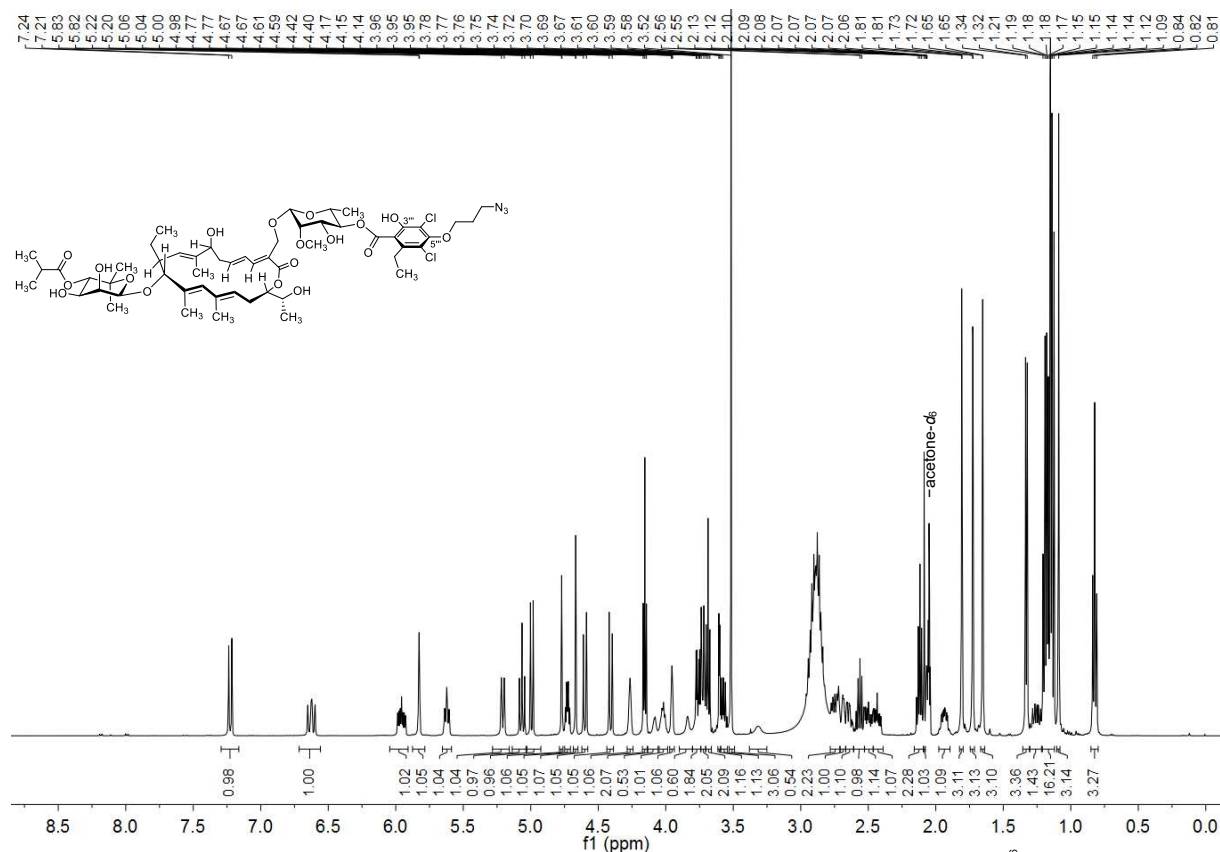

# <sup>13</sup>C NMR (125.81 MHz, 300 K, acetone-*d*<sub>6</sub>)

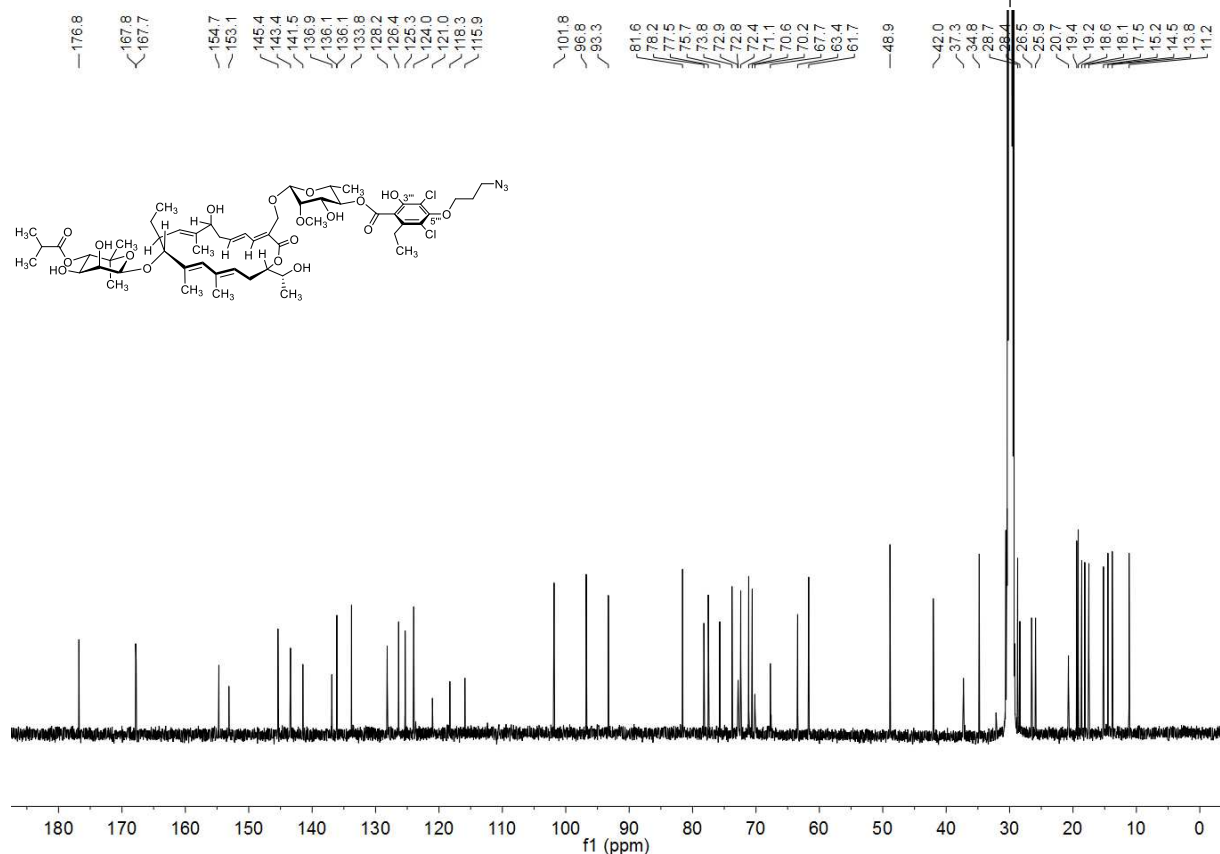

# <sup>13</sup>C NMR (125.81 MHz, 300 K, acetone-*d*<sub>6</sub>)

# Bis(azidopropyl)fidaxomicin (10b)

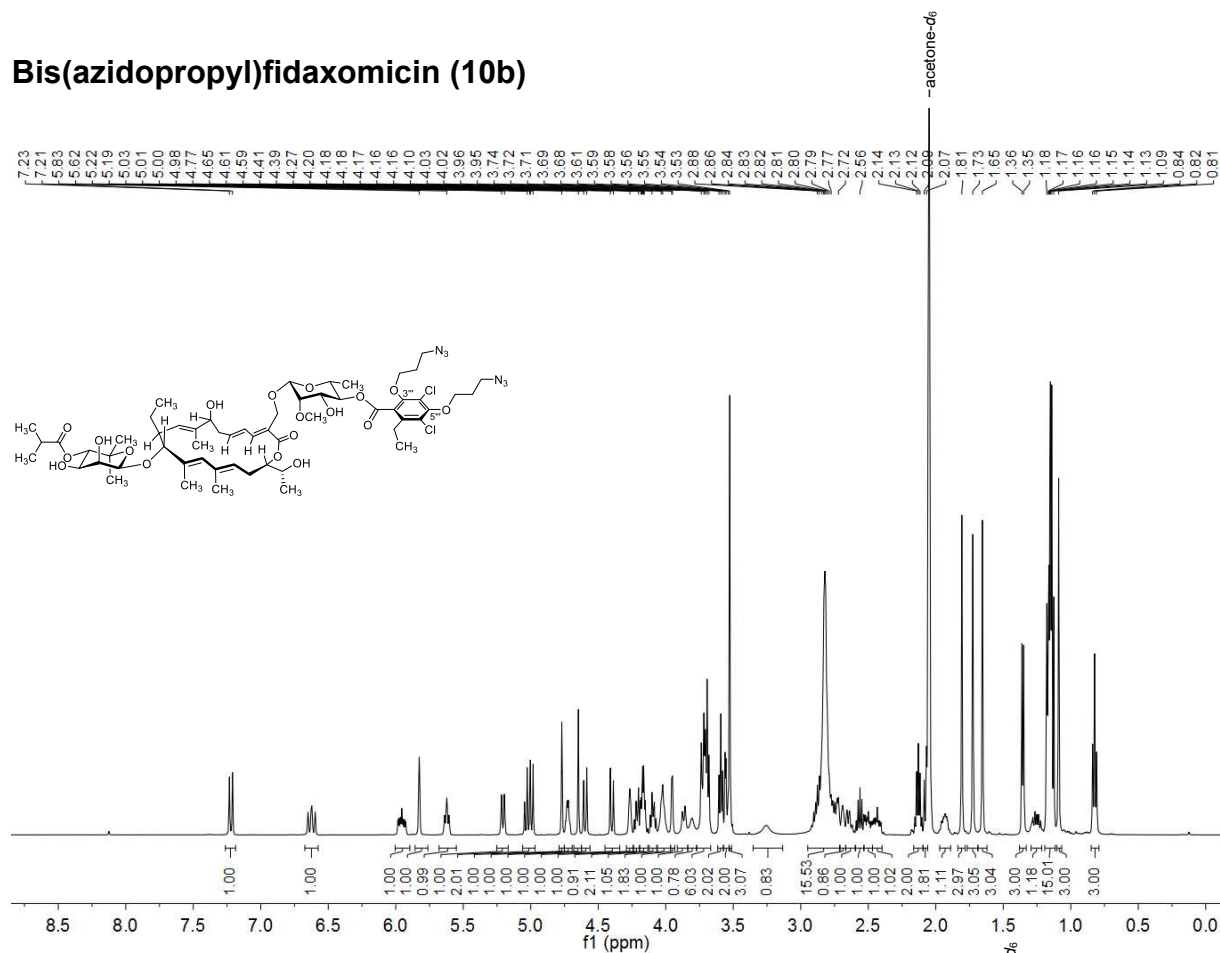

# <sup>13</sup>C NMR (125.81 MHz, 300 K, acetone-d<sub>6</sub>)

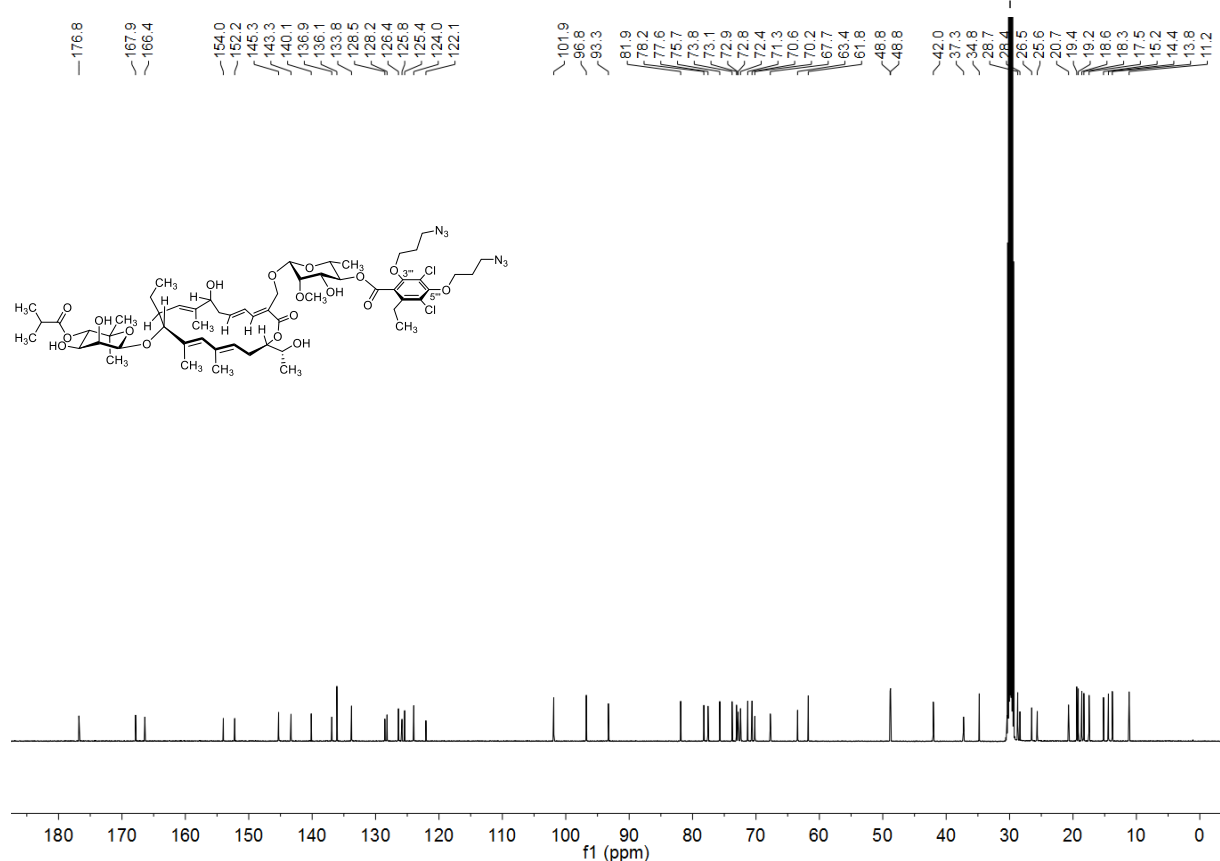

# <sup>13</sup>C NMR (125.81 MHz, 300 K, acetone-d<sub>6</sub>)

# Monotriazole with 3-Ethynylaniline (11a)

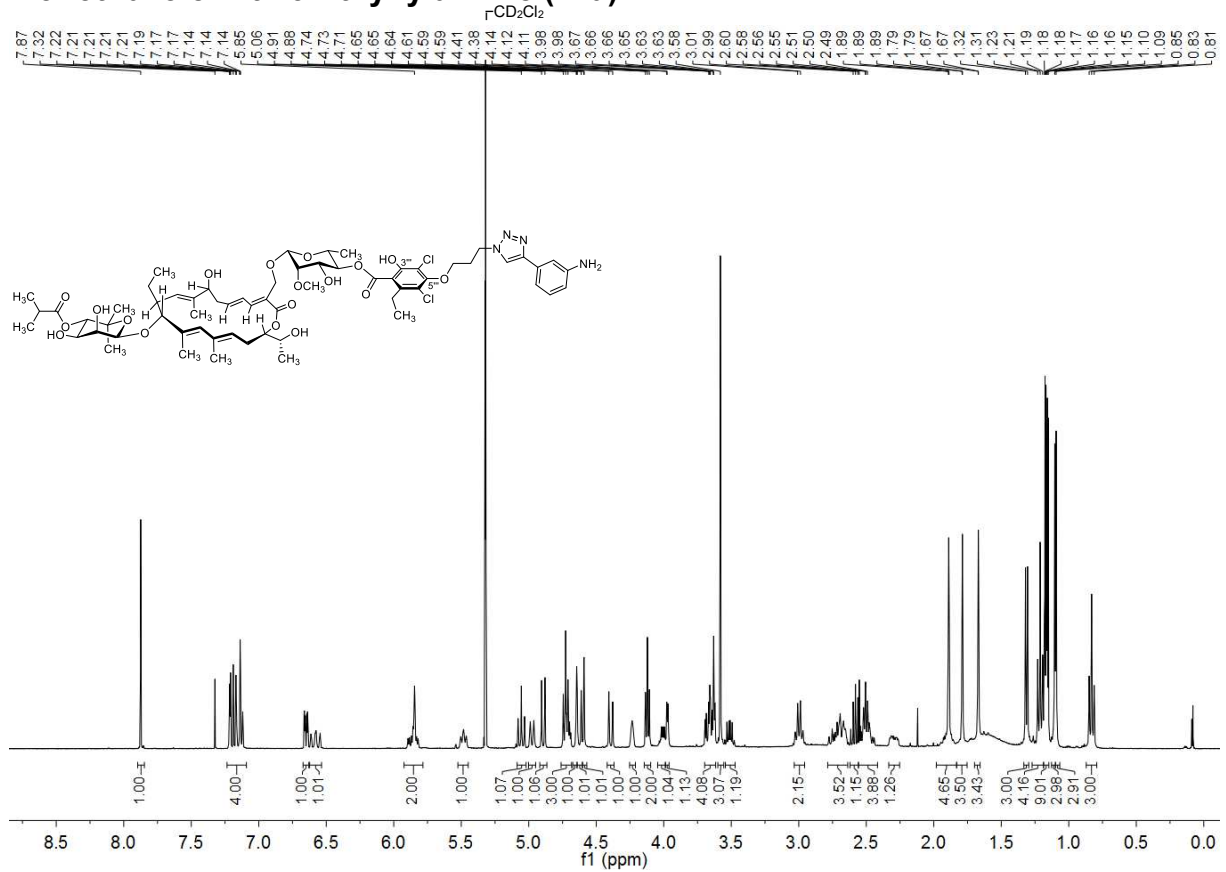

# $^{13}\text{C NMR}$ (125.81 MHz, 300 K, $\text{CD}_2\text{Cl}_2$ )

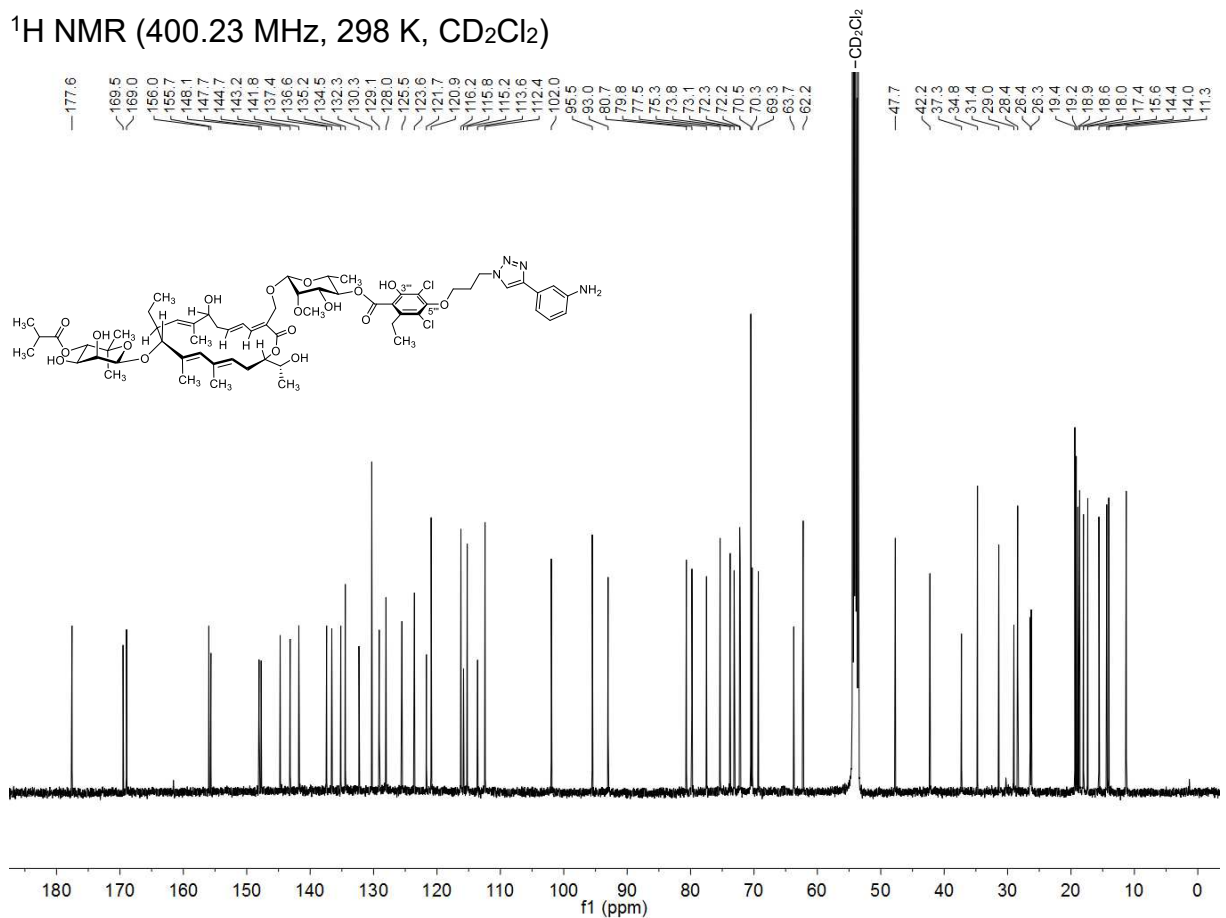

# $^{13}\text{C NMR}$ (125.81 MHz, 300 K, $\text{CD}_2\text{Cl}_2$ )

### Bistriazole with 3-Ethynylaniline (11b)

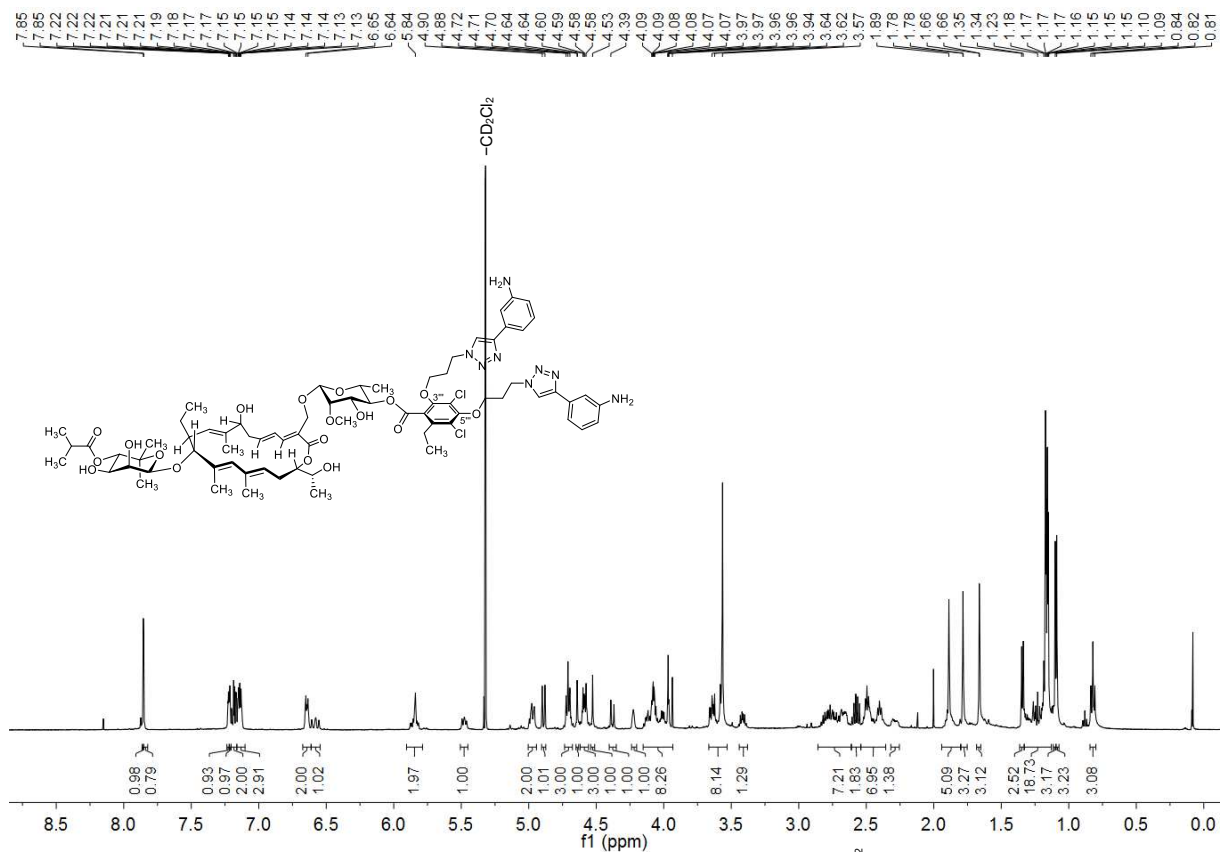

<sup>1</sup>H NMR (500.25 MHz, 298 K, CD<sub>2</sub>Cl<sub>2</sub>)

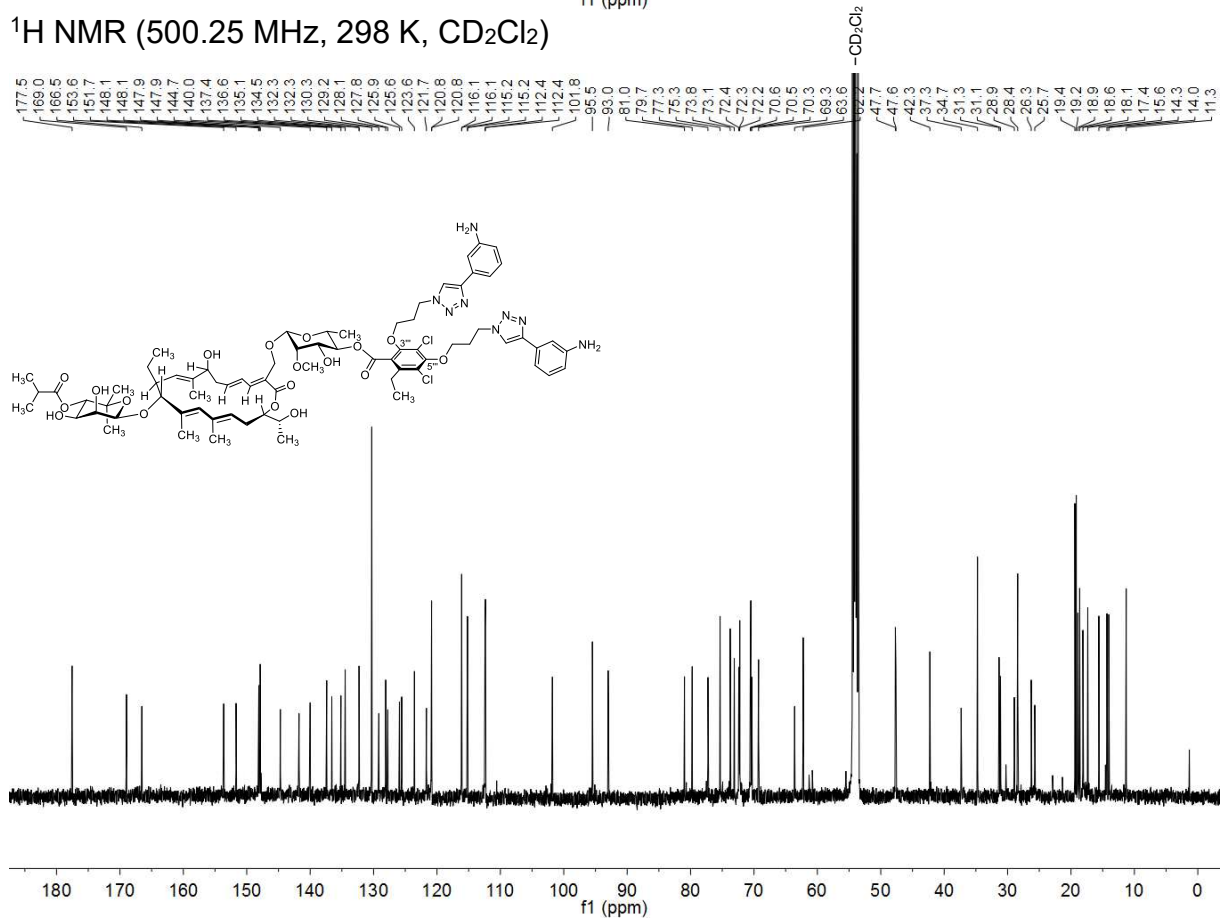

<sup>13</sup>C NMR (125.81 MHz, 300 K, CD<sub>2</sub>Cl<sub>2</sub>)

# Monotriazole with PEG5-acid (12)

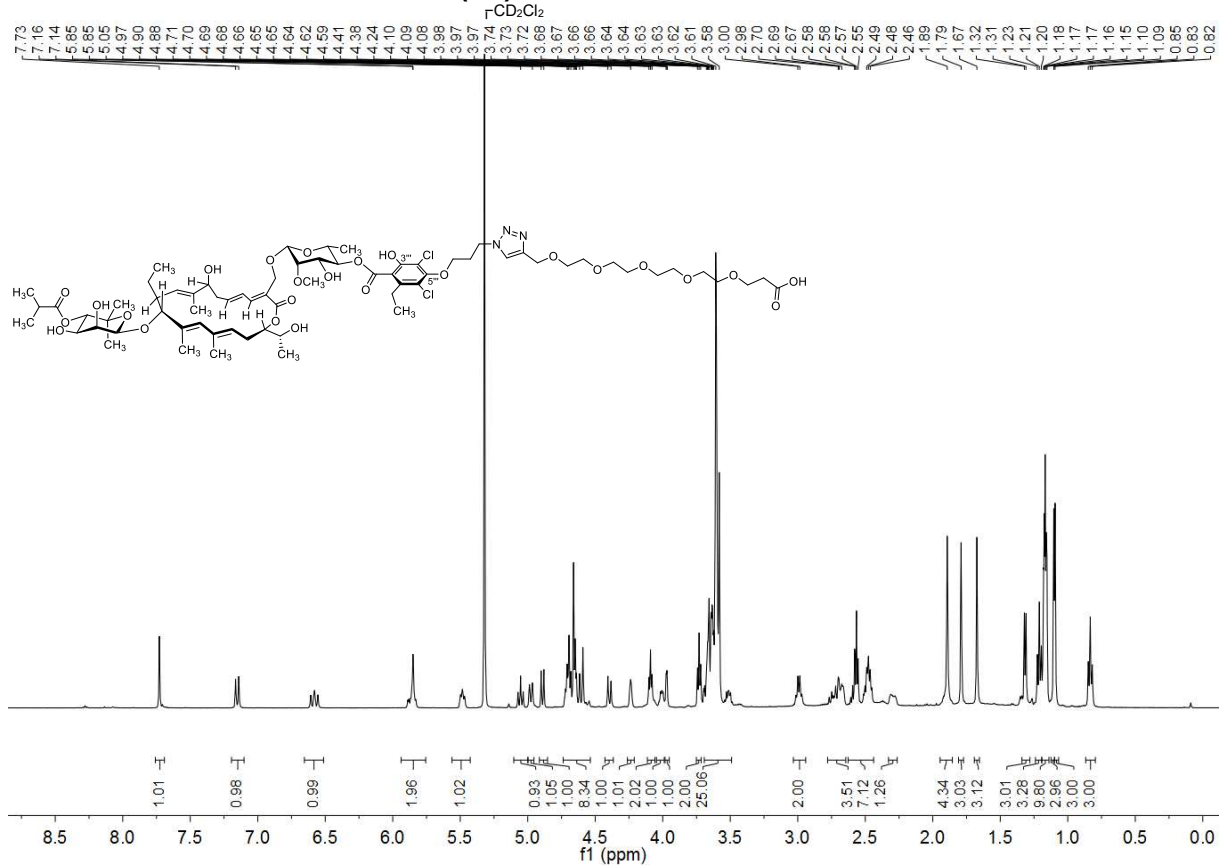

# <sup>1</sup>H NMR (500.30 MHz, 298 K, CD<sub>2</sub>Cl<sub>2</sub>)

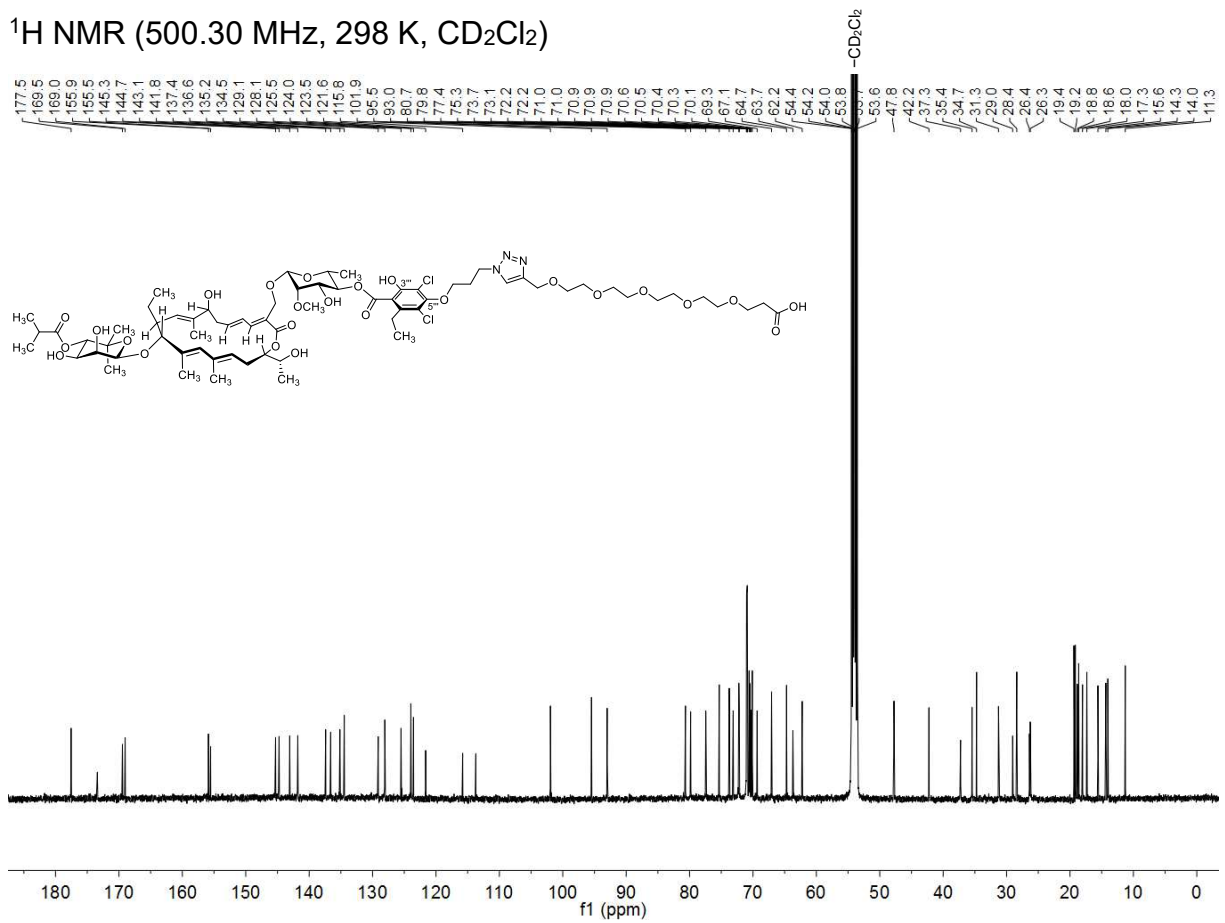

# <sup>13</sup>C NMR (125.81 MHz, 298 K, CD<sub>2</sub>Cl<sub>2</sub>)



# Monotriazole with Piperidin-4-amine Substituent (13a)

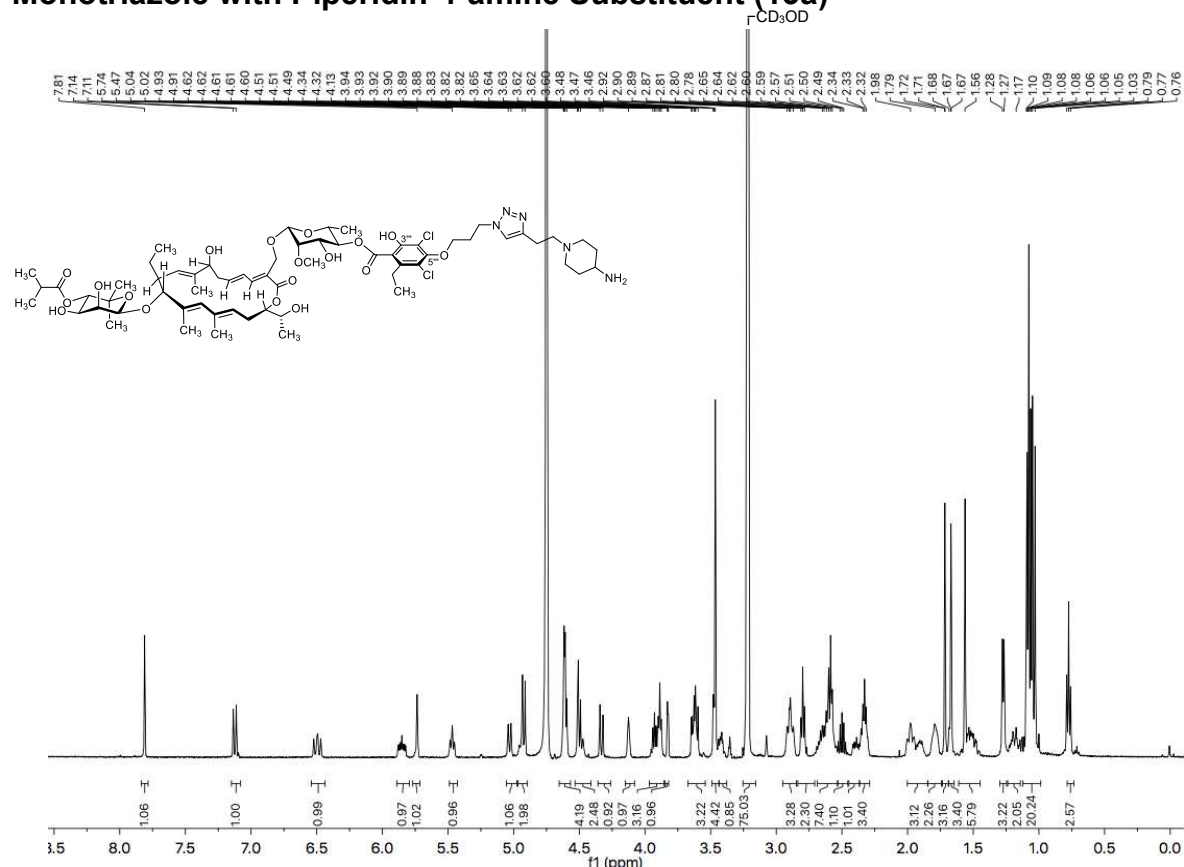

<sup>1</sup>H NMR (500.13 MHz, 300 K, D<sub>3</sub>CO)

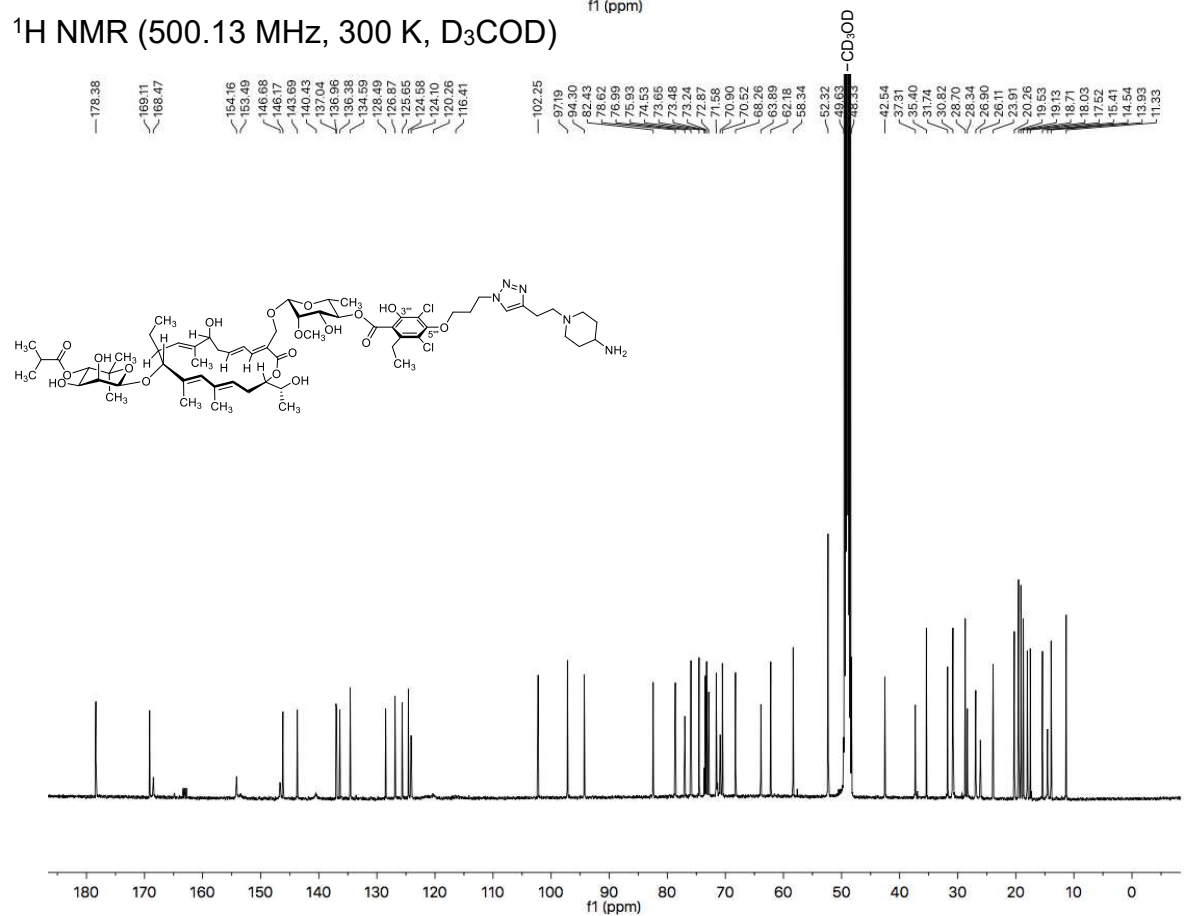

<sup>13</sup>C NMR (150.94 MHz, 298 K, D<sub>3</sub>CO)

# Ditriazole with Piperidin-4-amine Substituent (13b) -CD<sub>3</sub>OD

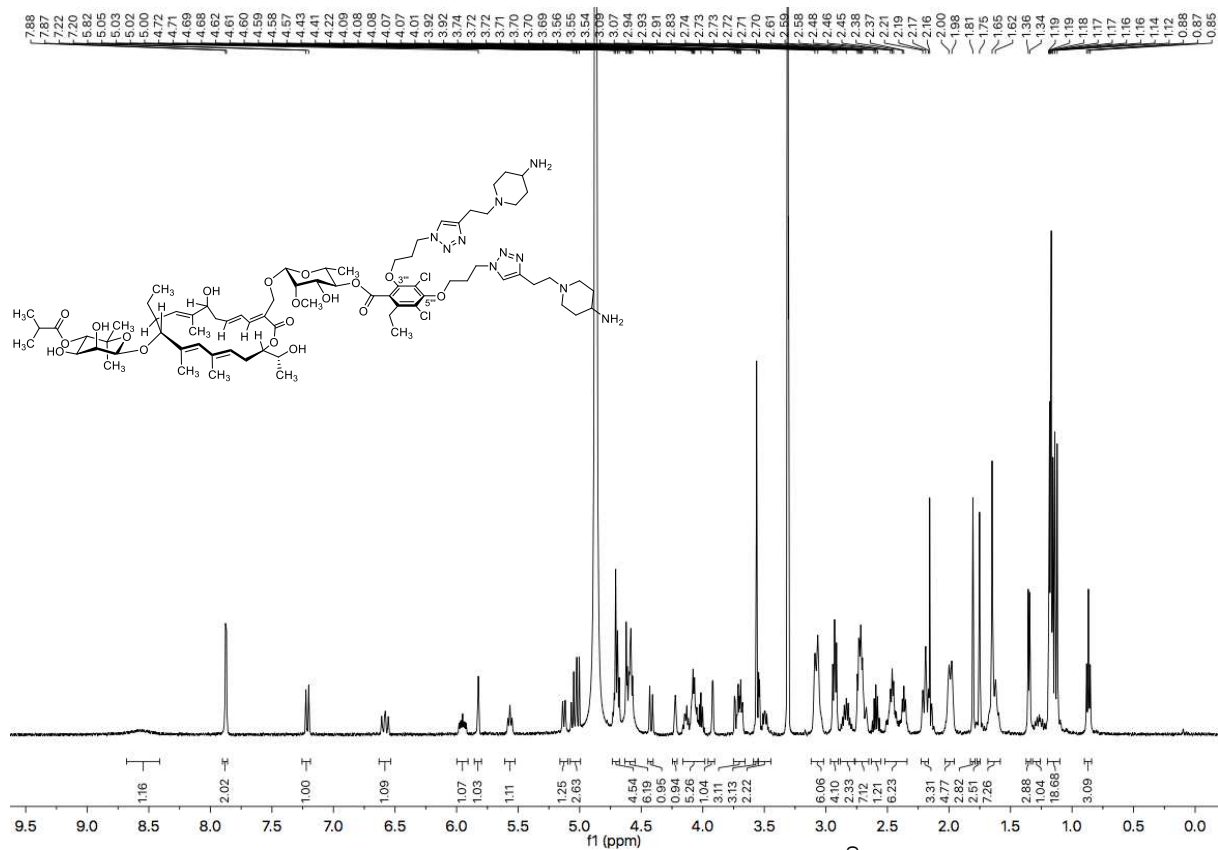

**<sup>1</sup>H NMR (500.13 MHz, 300 K, D<sub>3</sub>OD)**

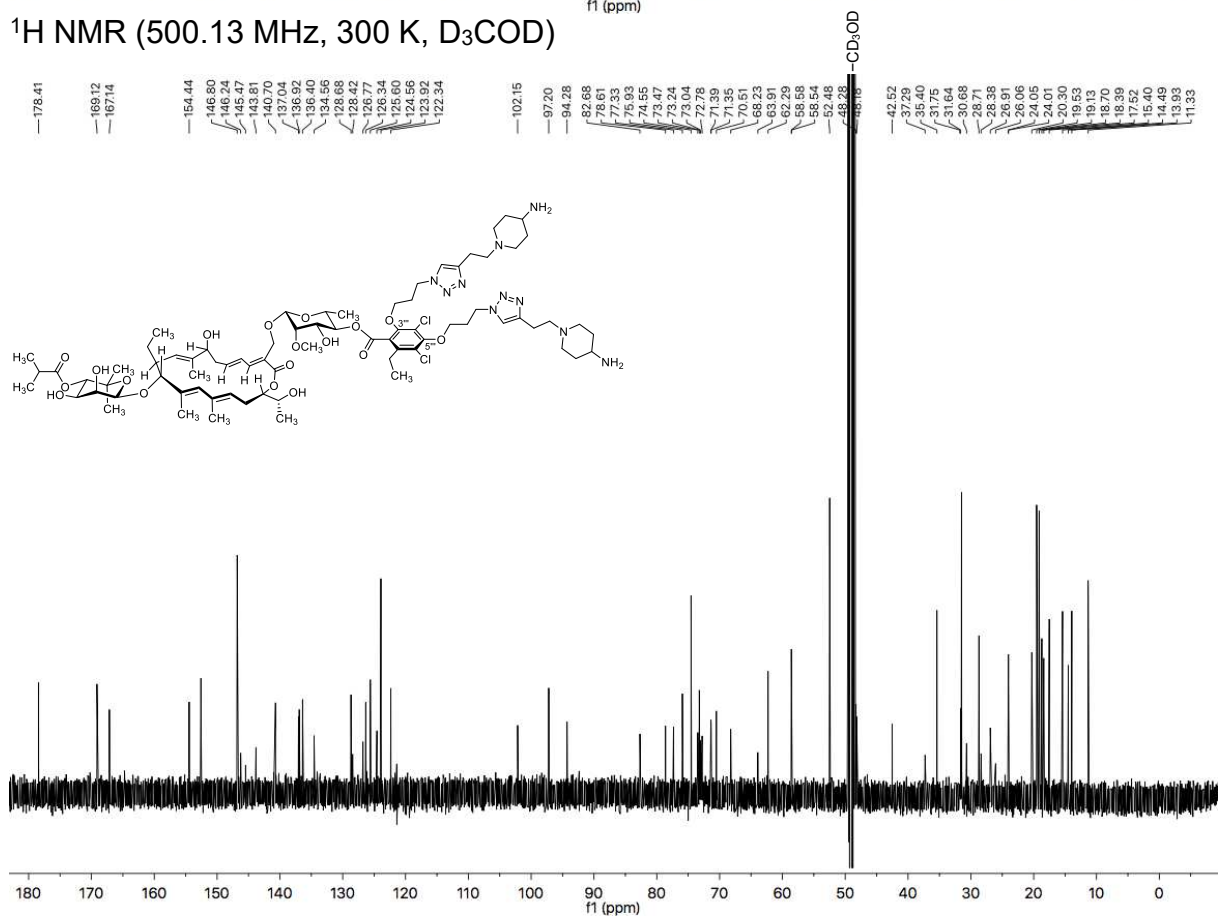

**<sup>13</sup>C NMR (150.94 MHz, 298 K, D<sub>3</sub>OD)**

**6-Fluoro-7-[4-(2-bromoacetyl)piperazin-1-yl]-4-oxo-1,4-dihydroquinoline-3-carboxylic acid (14)**

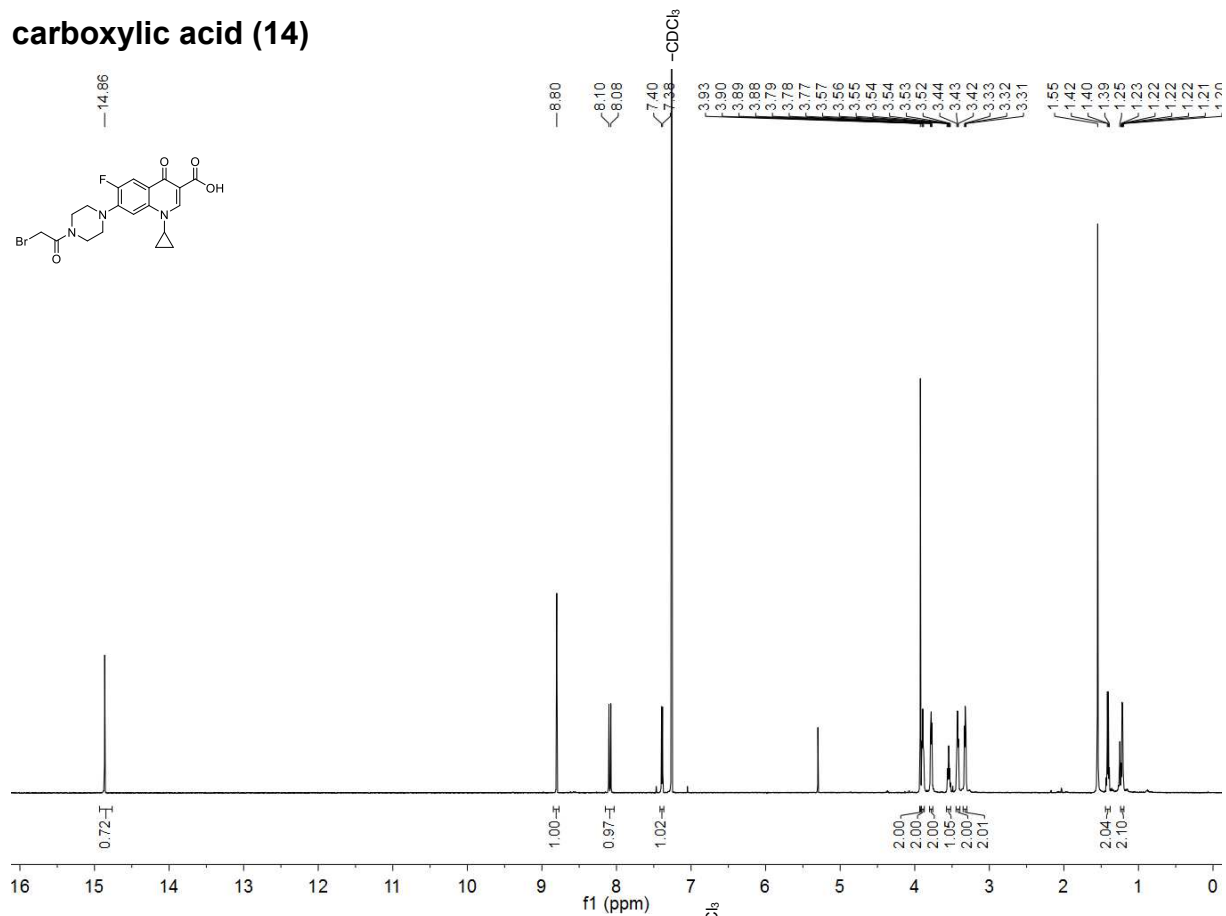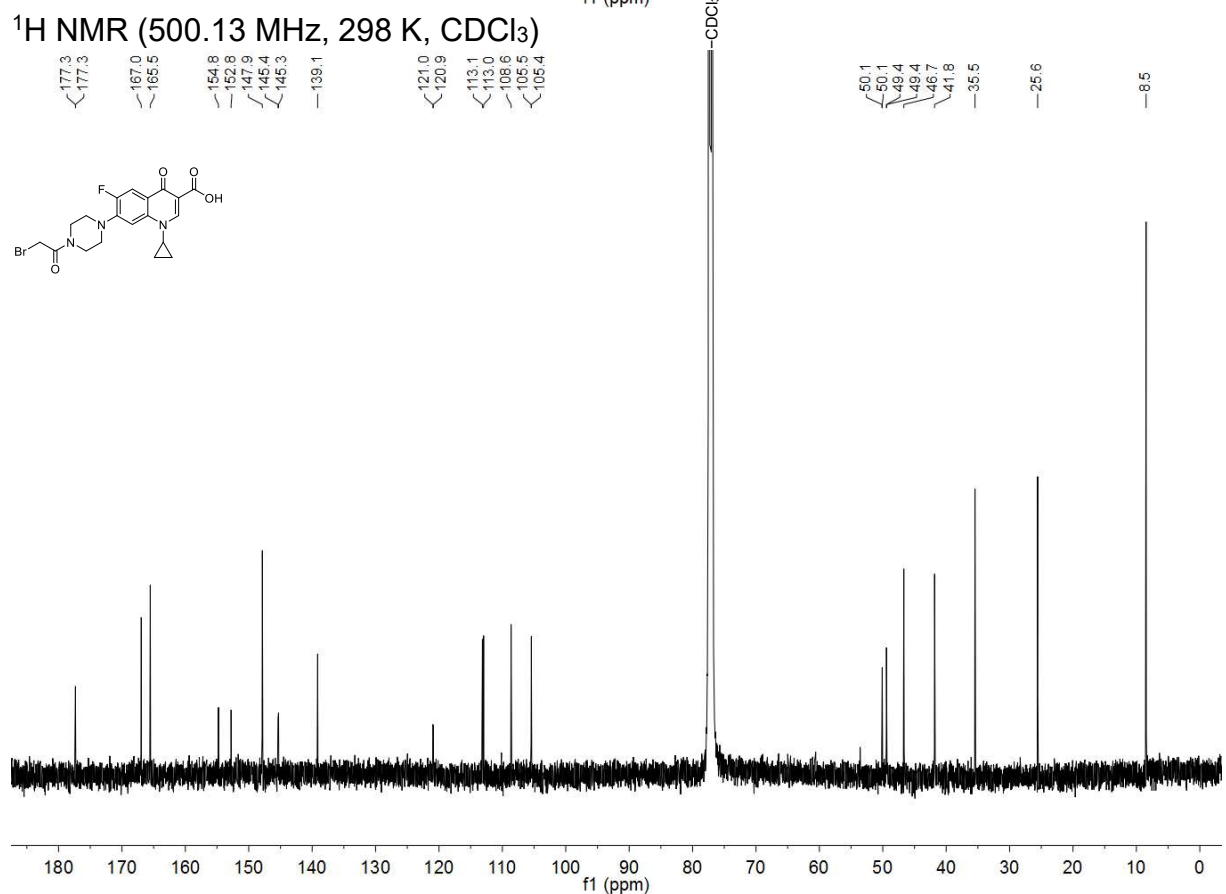

**<sup>13</sup>C NMR (125.81 MHz, 298 K, CDCl<sub>3</sub>)**

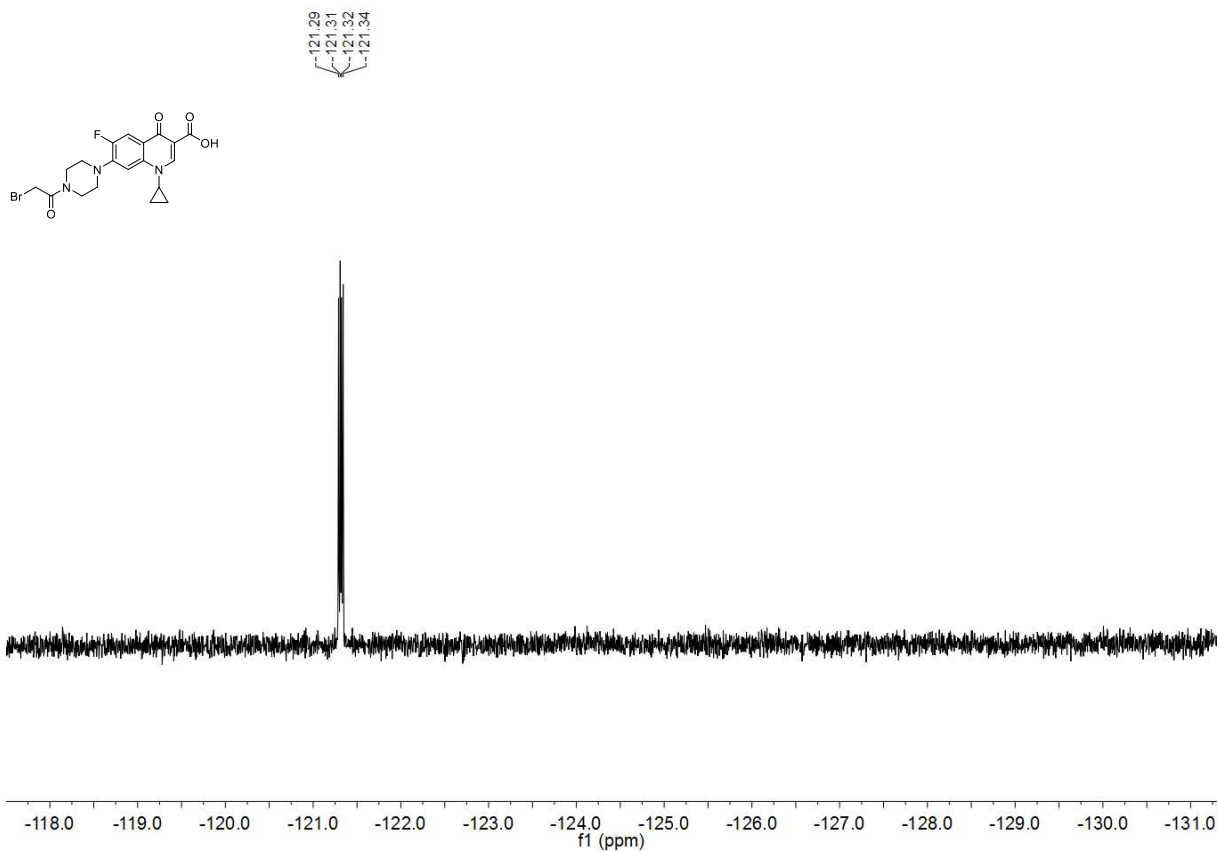

$^{19}\text{F}$  NMR (376.46 MHz, 298 K,  $\text{CDCl}_3$ )

# Fidaxomicin-Ciprofloxacin (15a)

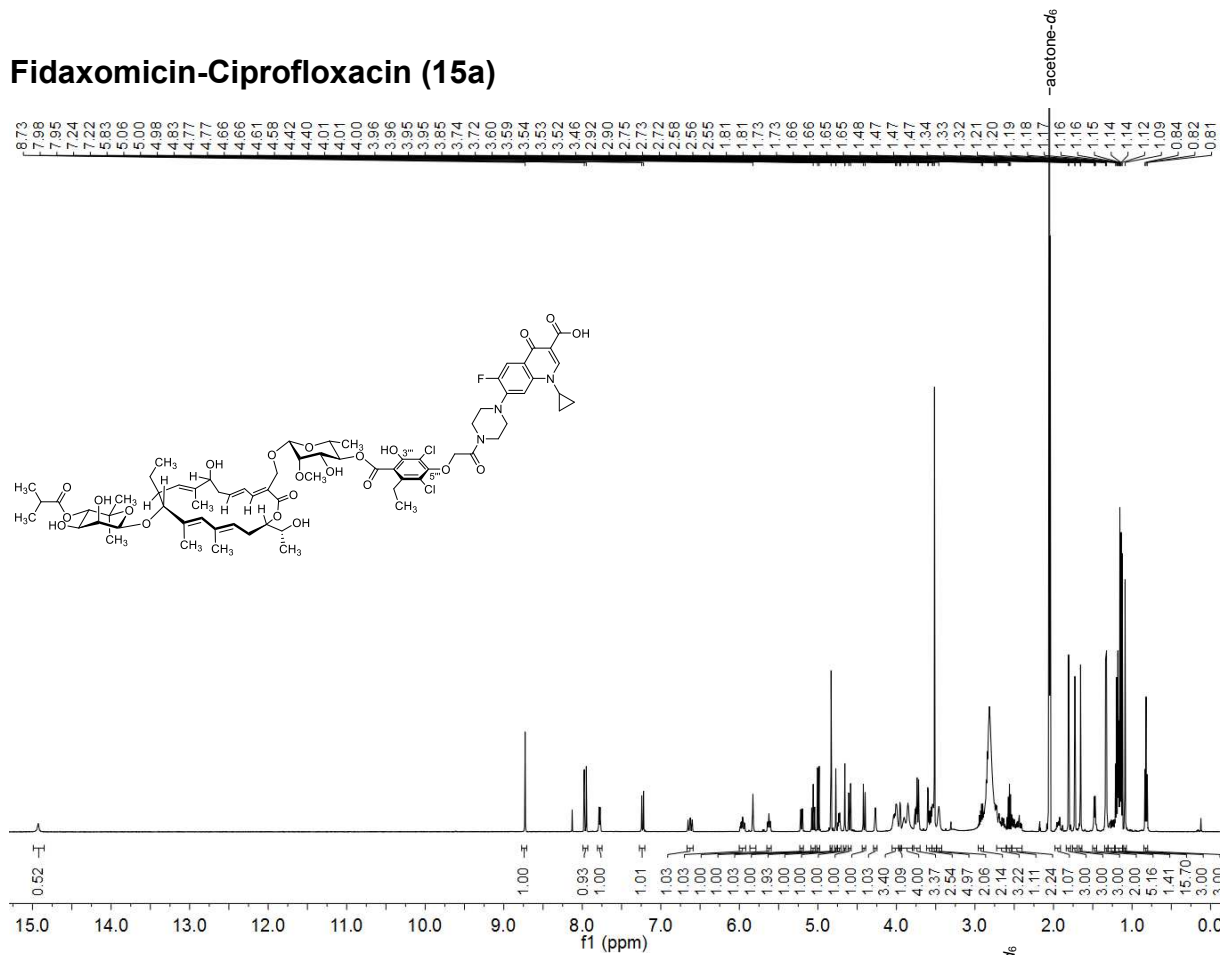

# <sup>1</sup>H NMR (500.13 MHz, 298 K, acetone-d<sub>6</sub>)

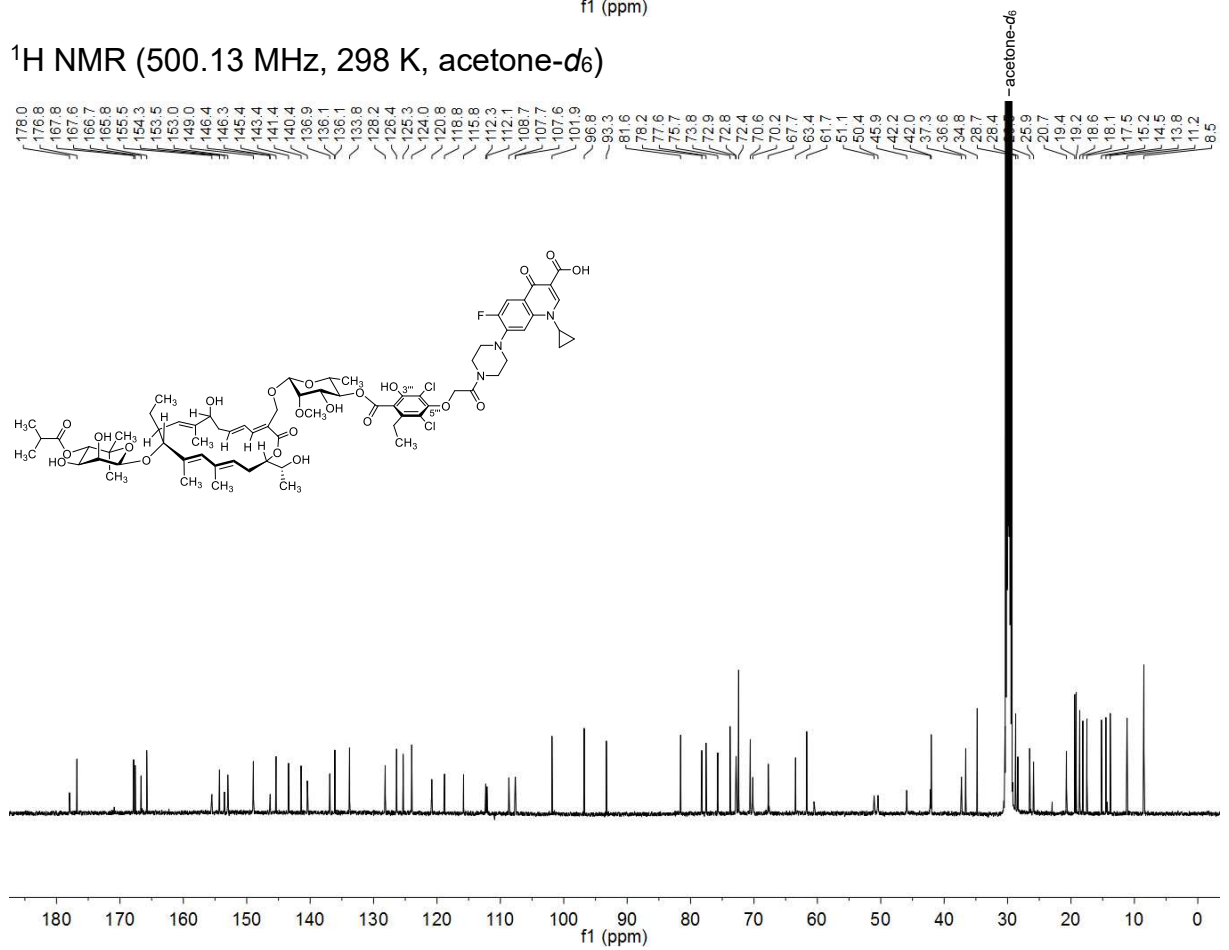

# Fidaxomicin-Bis(ciprofloxacin) (15b)

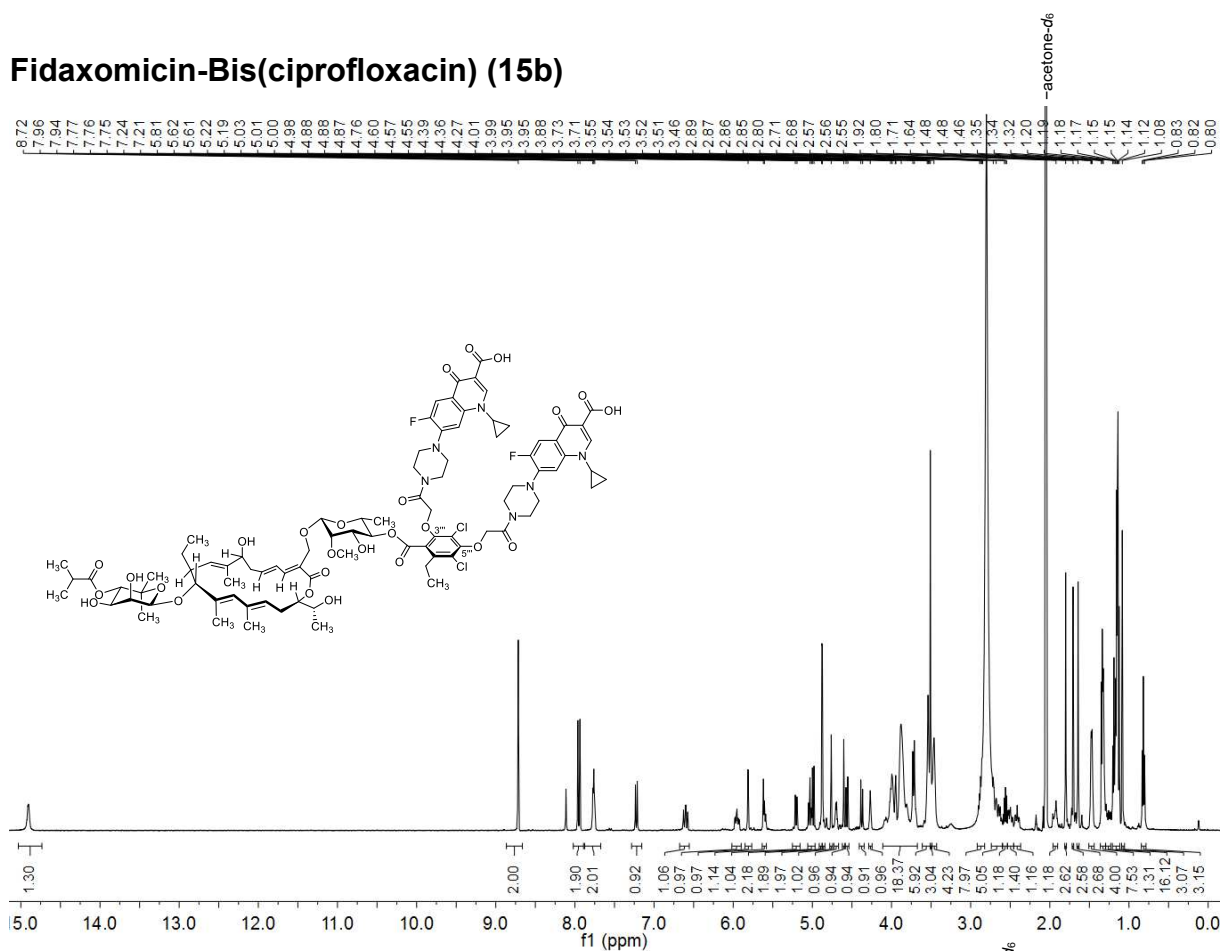

# <sup>1</sup>H NMR (500.13 MHz, 300 K, acetone-*d*<sub>6</sub>)

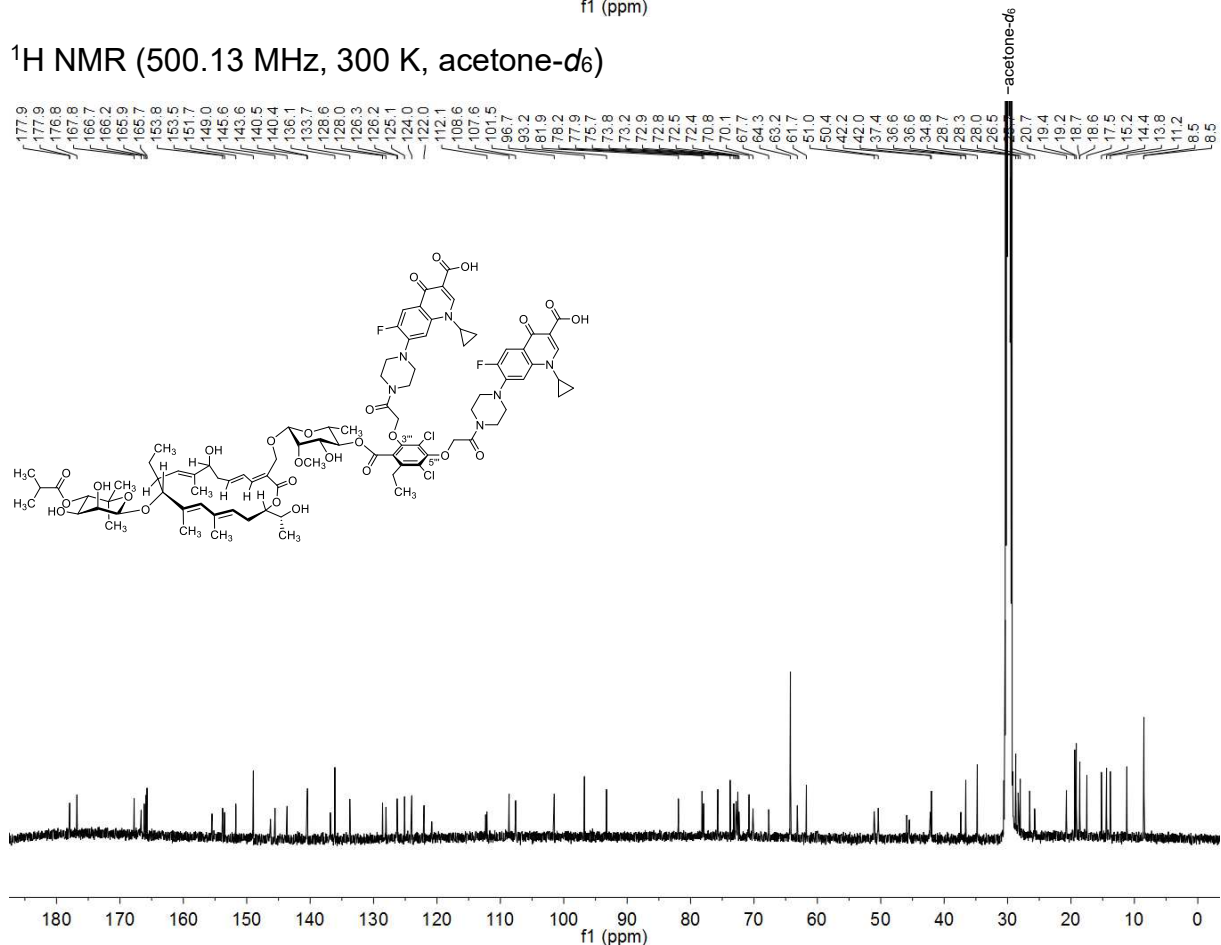

# <sup>13</sup>C NMR (125.81 MHz, 298 K, acetone-*d*<sub>6</sub>)

# 23-Azido-3,6,9,12,15,18,21-heptaooxatricosyl 4-nitrobenzenesulfonate (16)

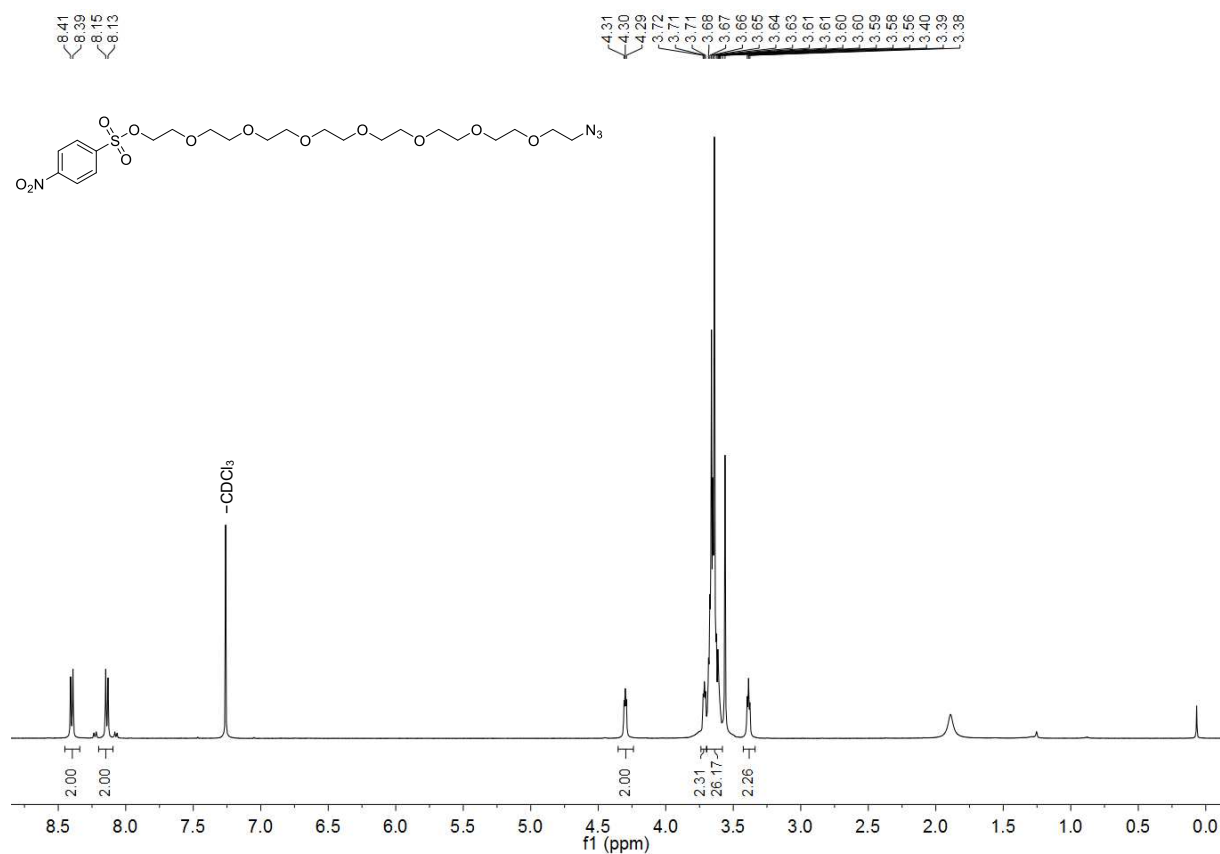

# <sup>13</sup>C NMR (125.81 MHz, 300 K, CDCl<sub>3</sub>)

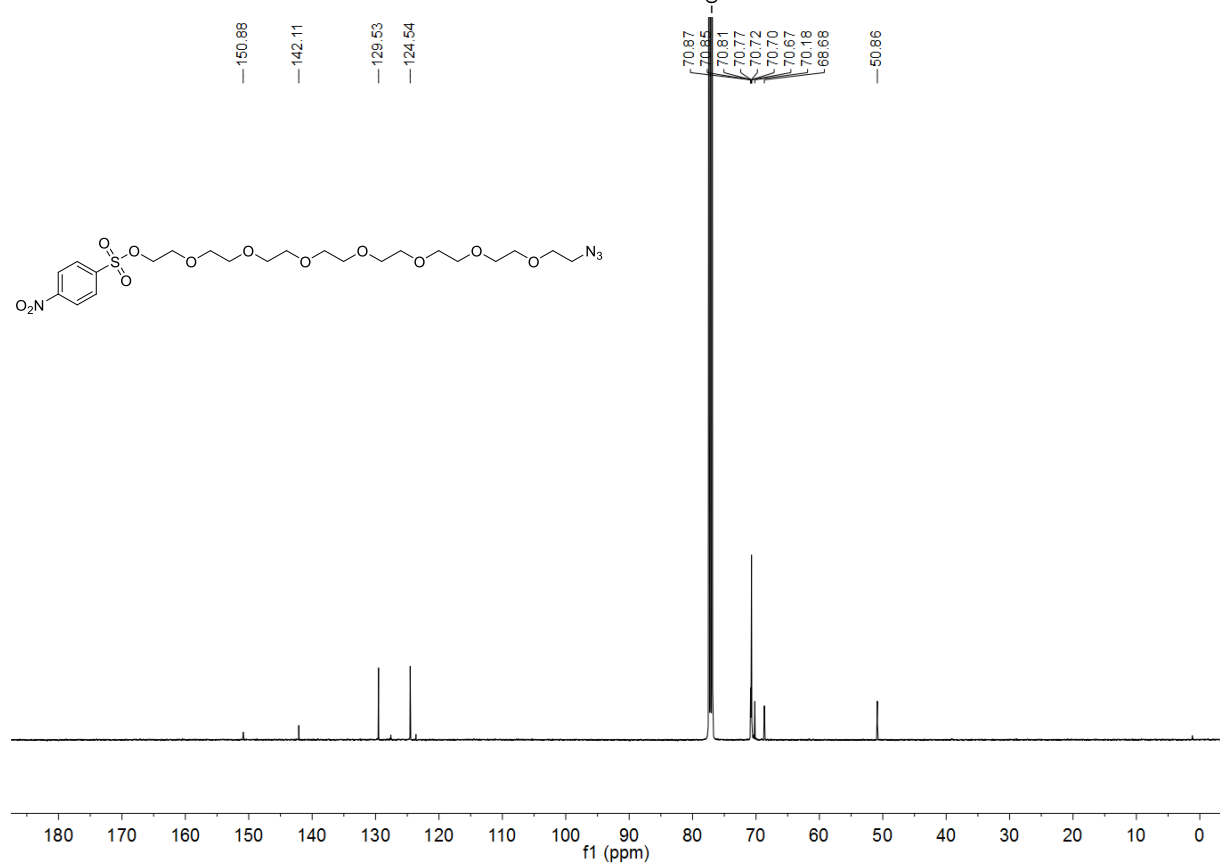

# <sup>13</sup>C NMR (125.81 MHz, 300 K, CDCl<sub>3</sub>)

# Fidaxomicin-OEG-azide (17)

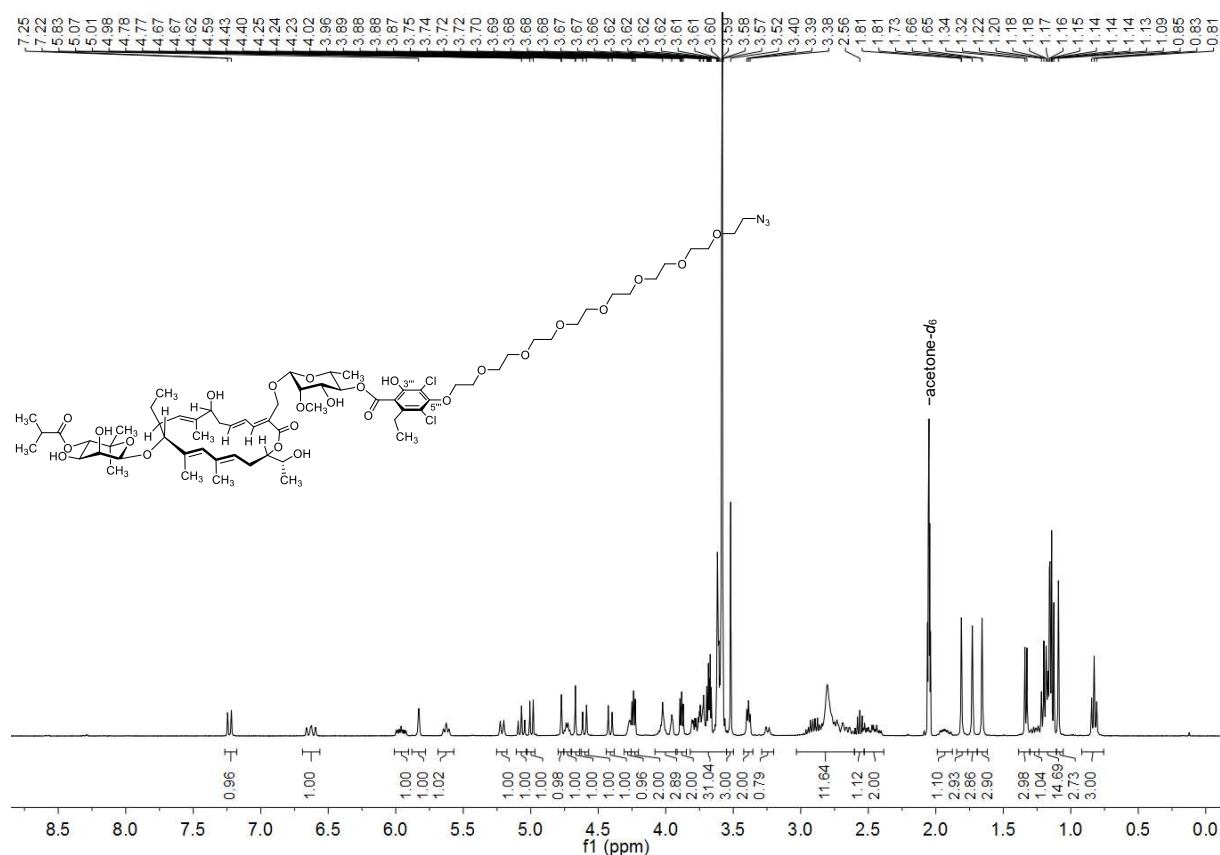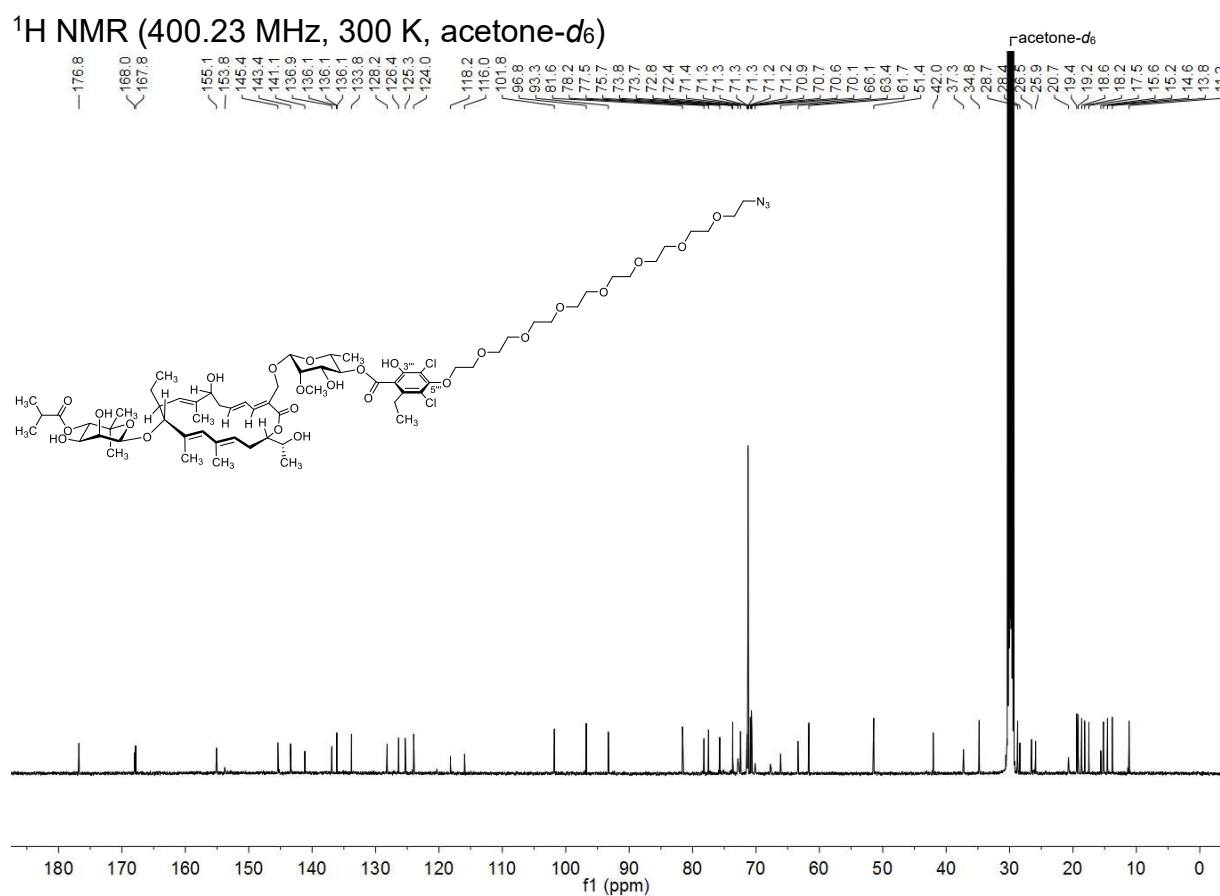



# 1-Nitrosopiperazine

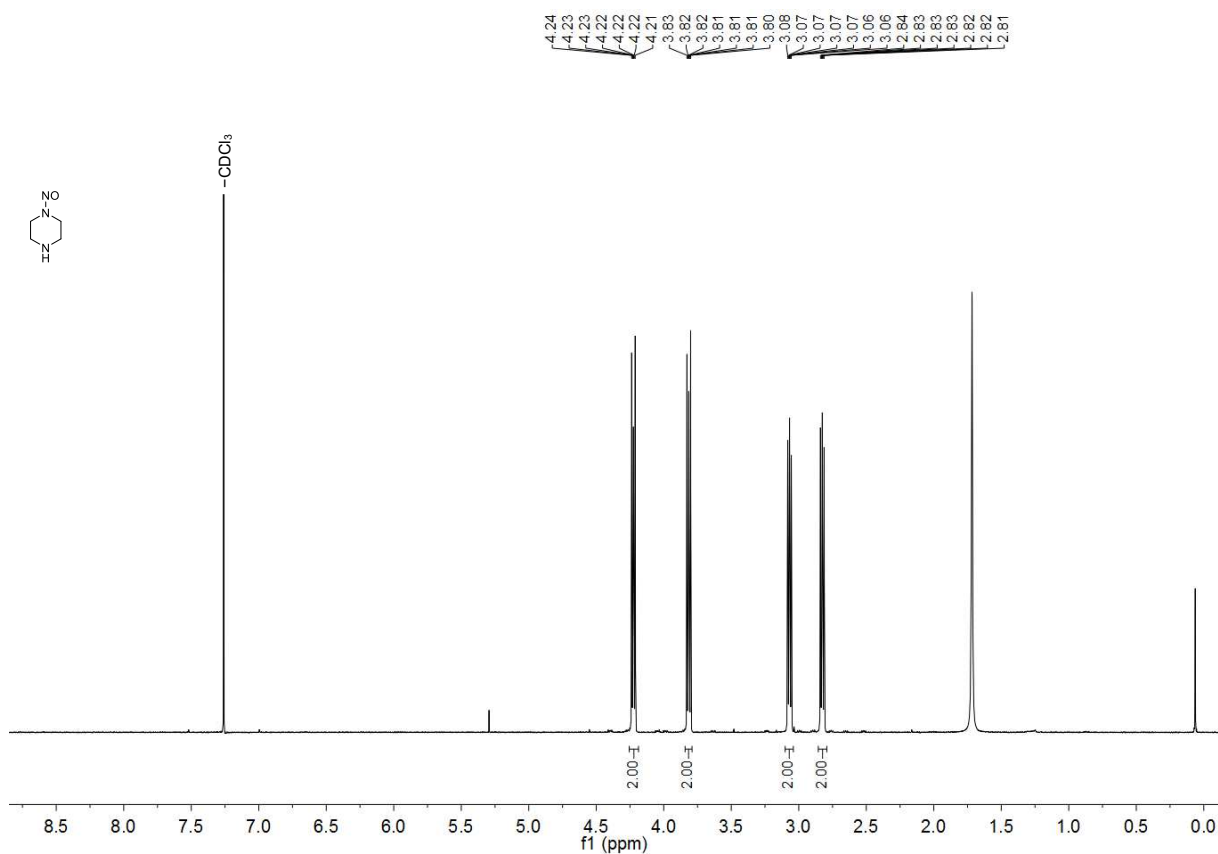

<sup>1</sup>H NMR (400.13 MHz, 300 K, CDCl<sub>3</sub>)

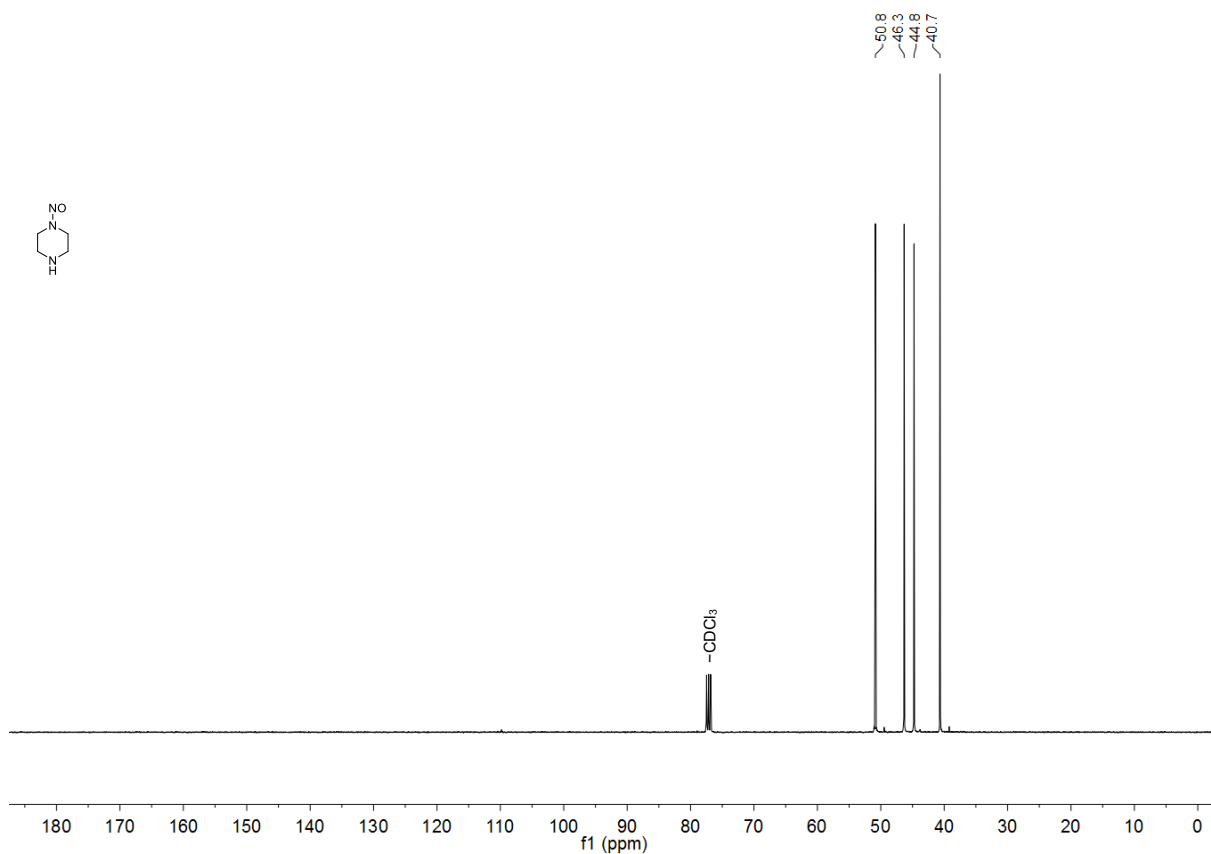

<sup>13</sup>C NMR (100.62 MHz, 298 K, CDCl<sub>3</sub>)

# 1-Nitroso-4-propargylpiperazine

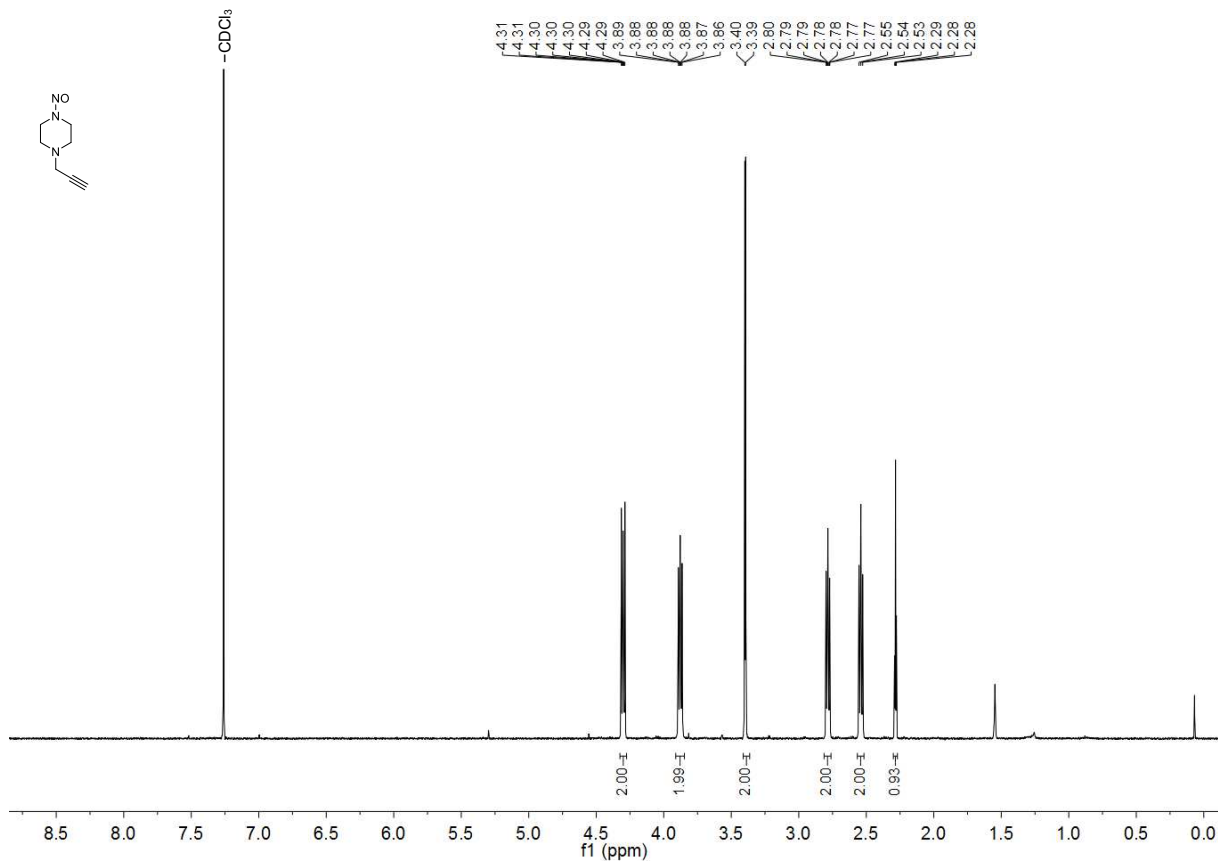

## <sup>1</sup>H NMR (400.13 MHz, 300 K, CDCl<sub>3</sub>)

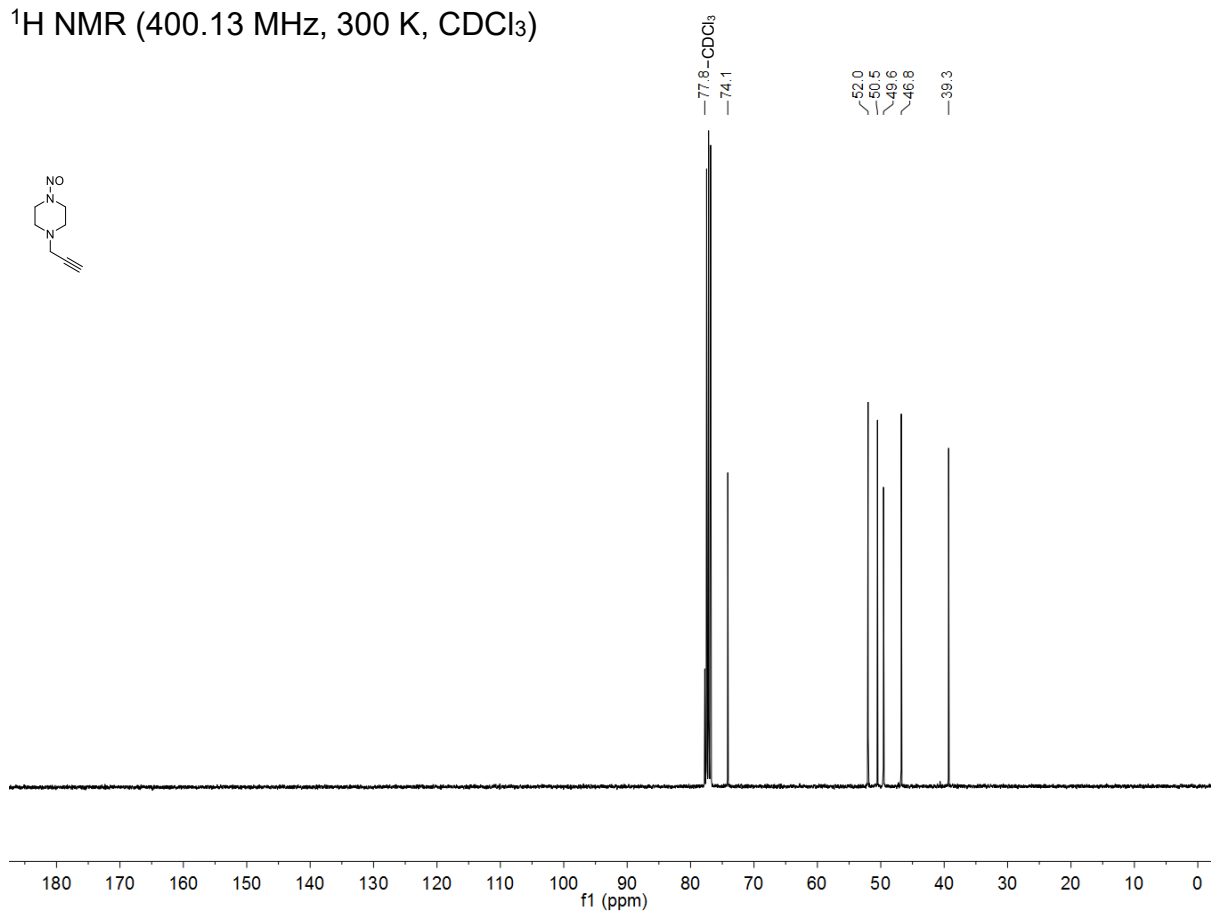

## <sup>13</sup>C NMR (100.62 MHz, 298 K, CDCl<sub>3</sub>)

# 1-Amino-4-propargylpiperazine

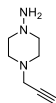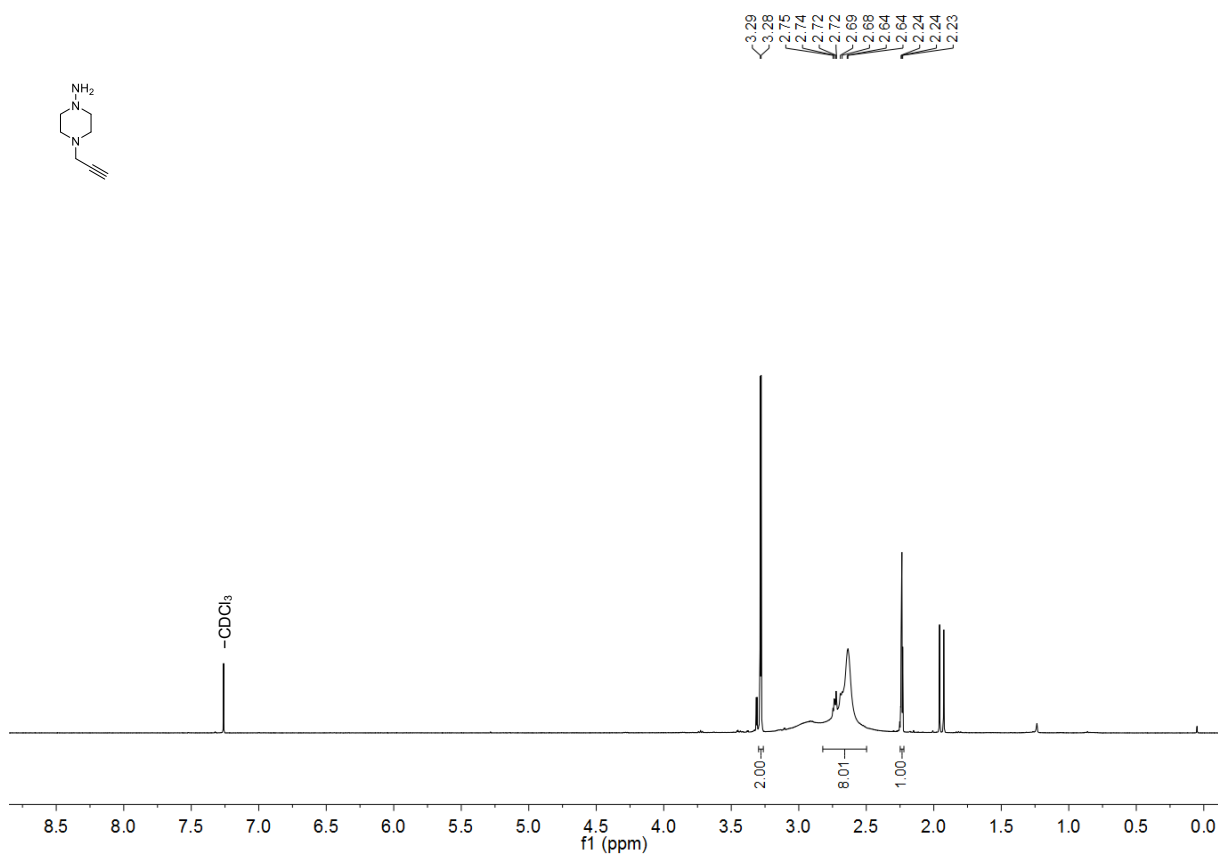

<sup>1</sup>H NMR (400.13 MHz, 300 K, CDCl<sub>3</sub>)

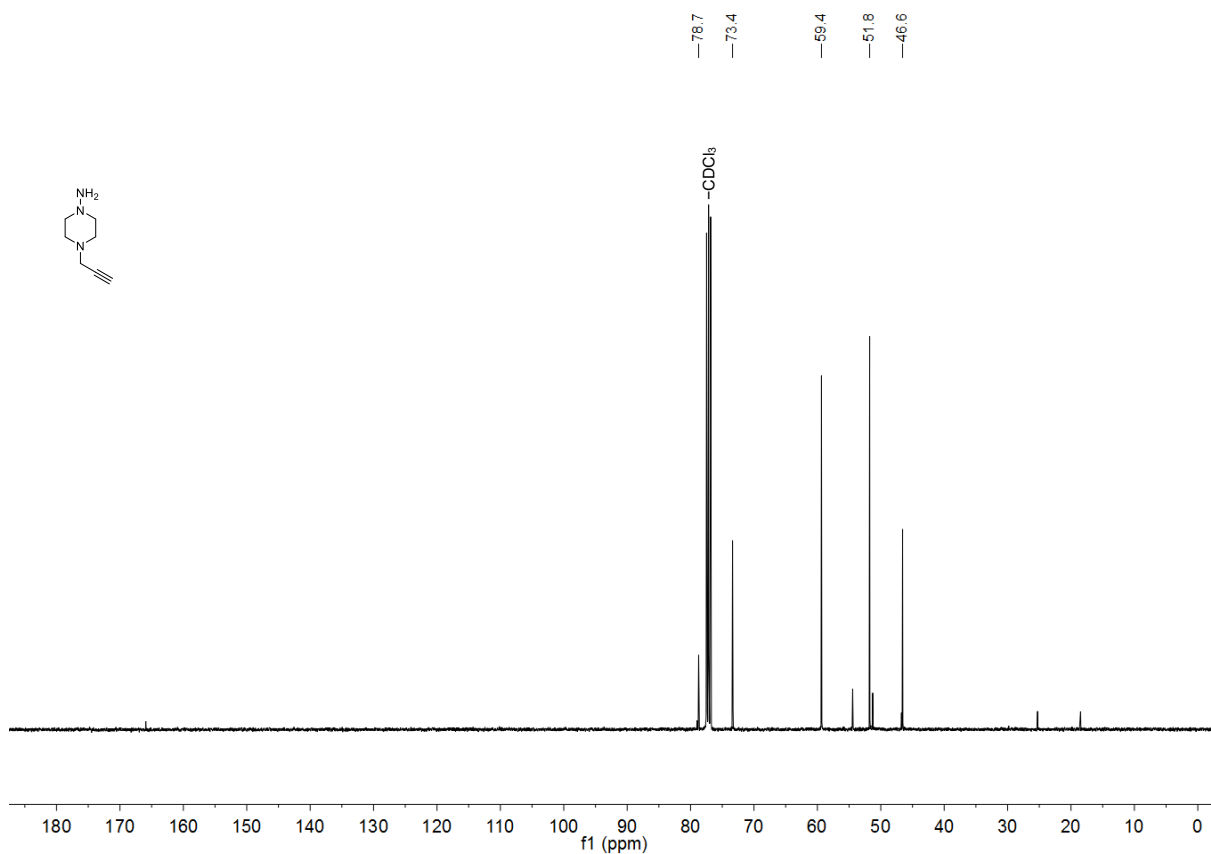

<sup>13</sup>C NMR (100.62 MHz, 300 K, CDCl<sub>3</sub>)

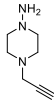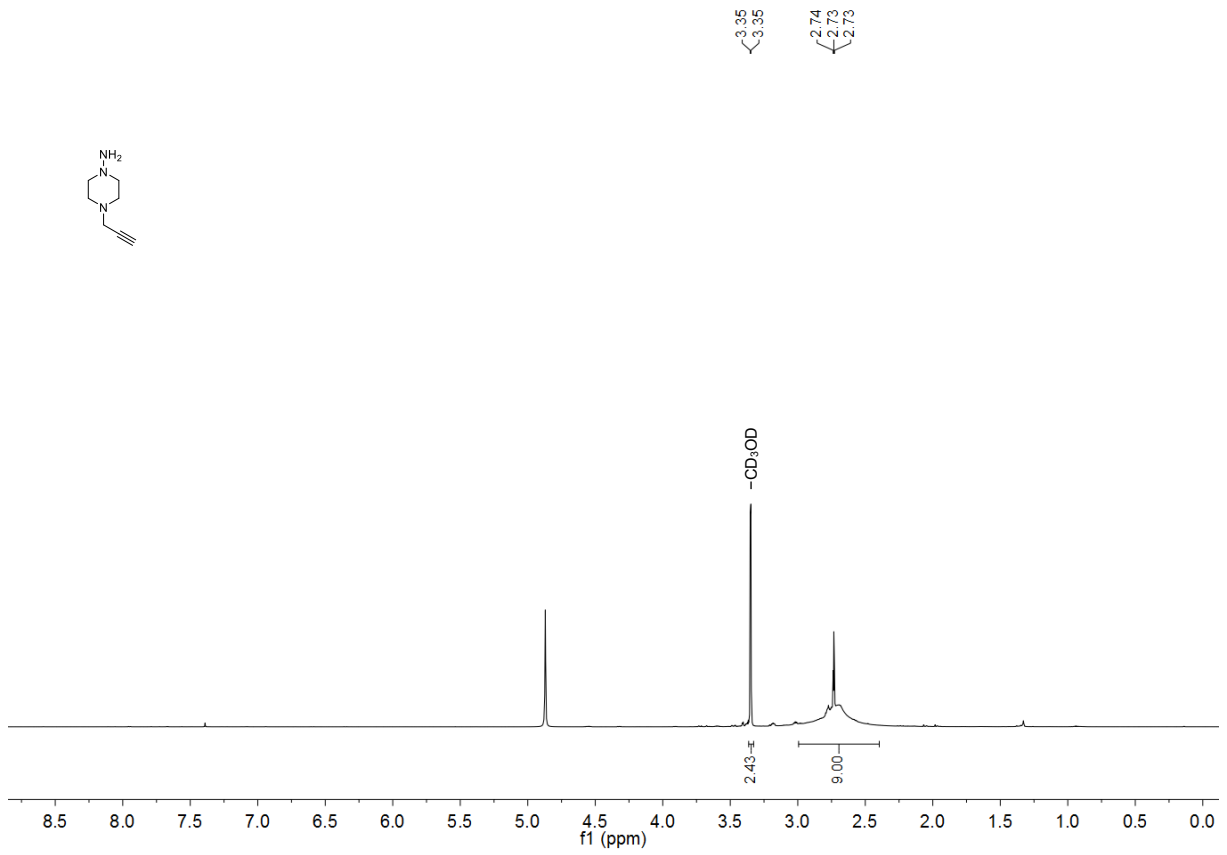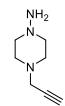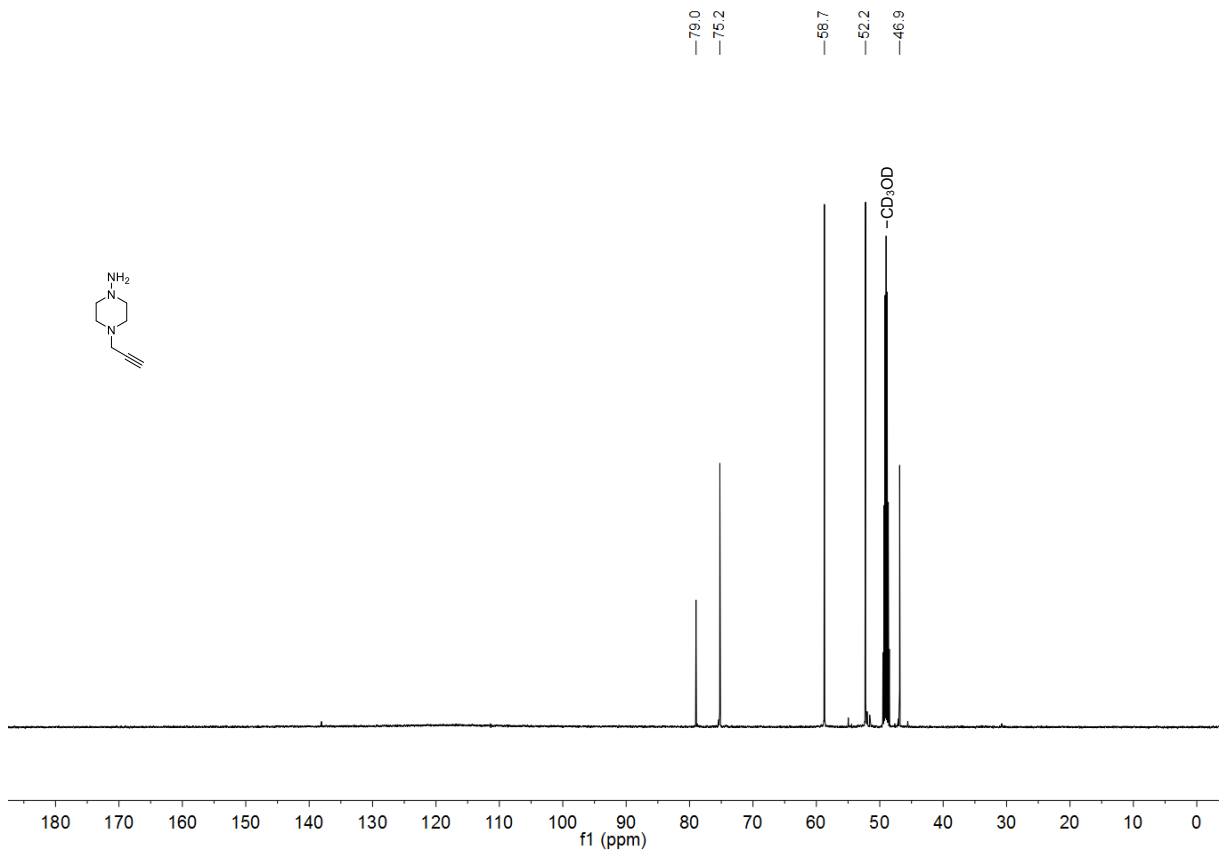

$^{13}\text{C}$  NMR (125.77 MHz, 300 K,  $\text{D}_3\text{COD}$ )

# Alkynylated Rifampicin (18)

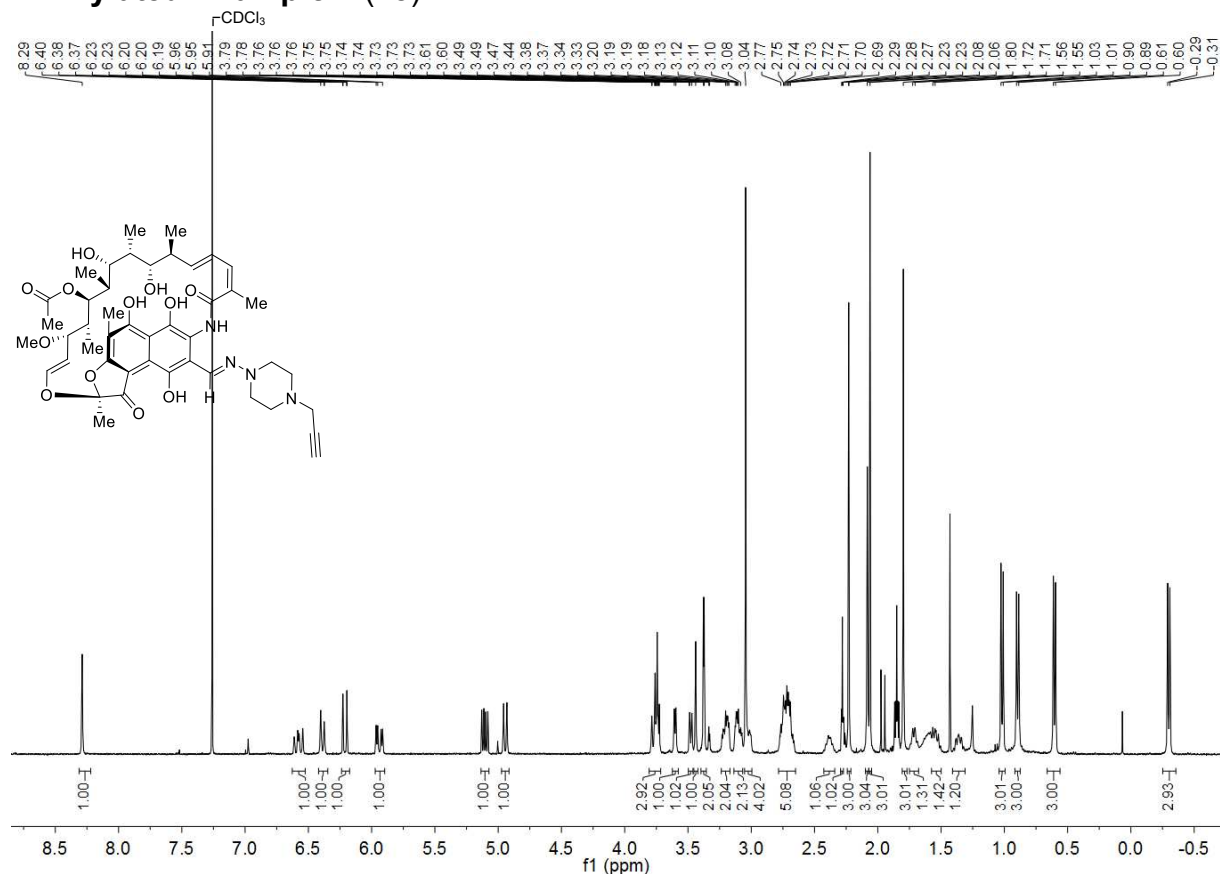

# <sup>13</sup>C NMR (100.62 MHz, 298 K, CDCl<sub>3</sub>)

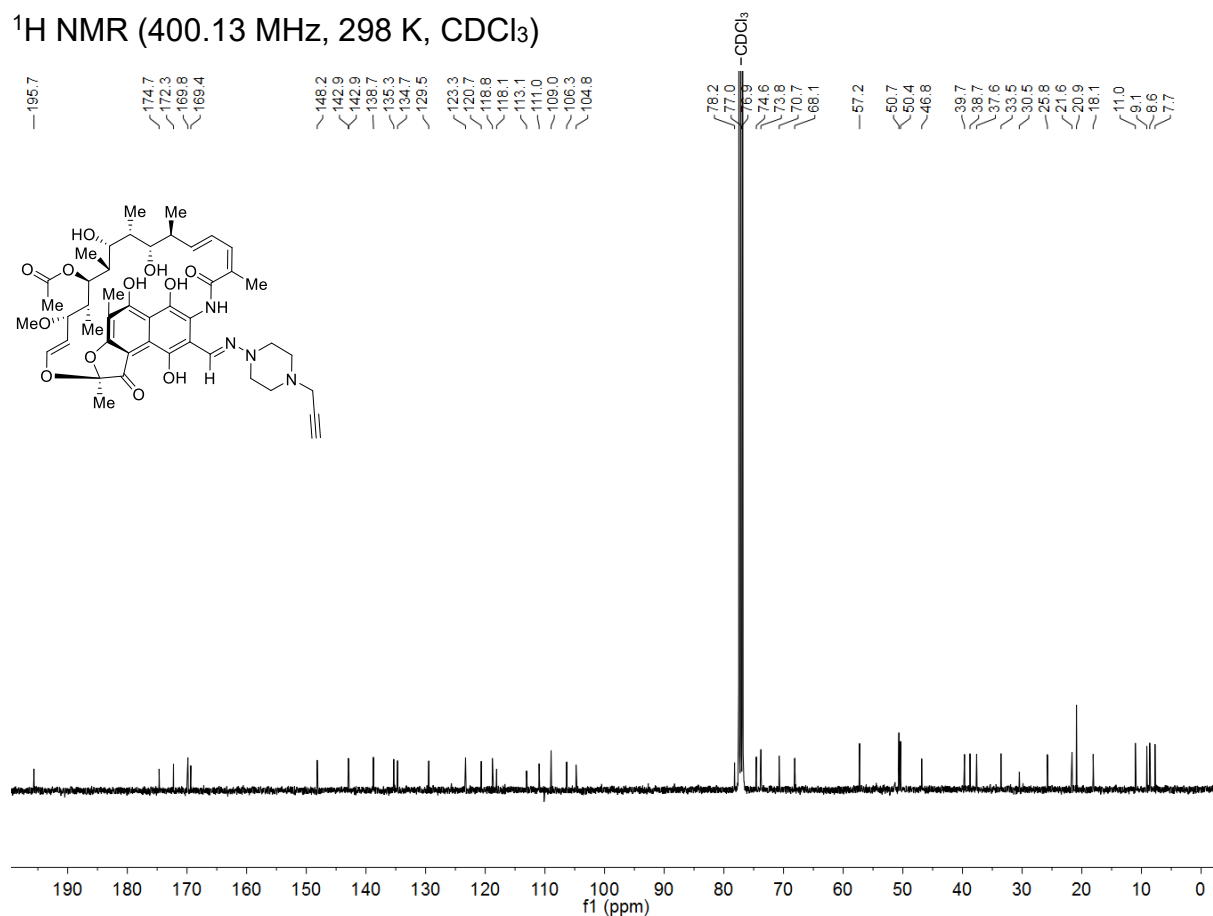

# <sup>13</sup>C NMR (100.62 MHz, 298 K, CDCl<sub>3</sub>)

# Fidaxomicin-Rifampicin Hybrid (19)

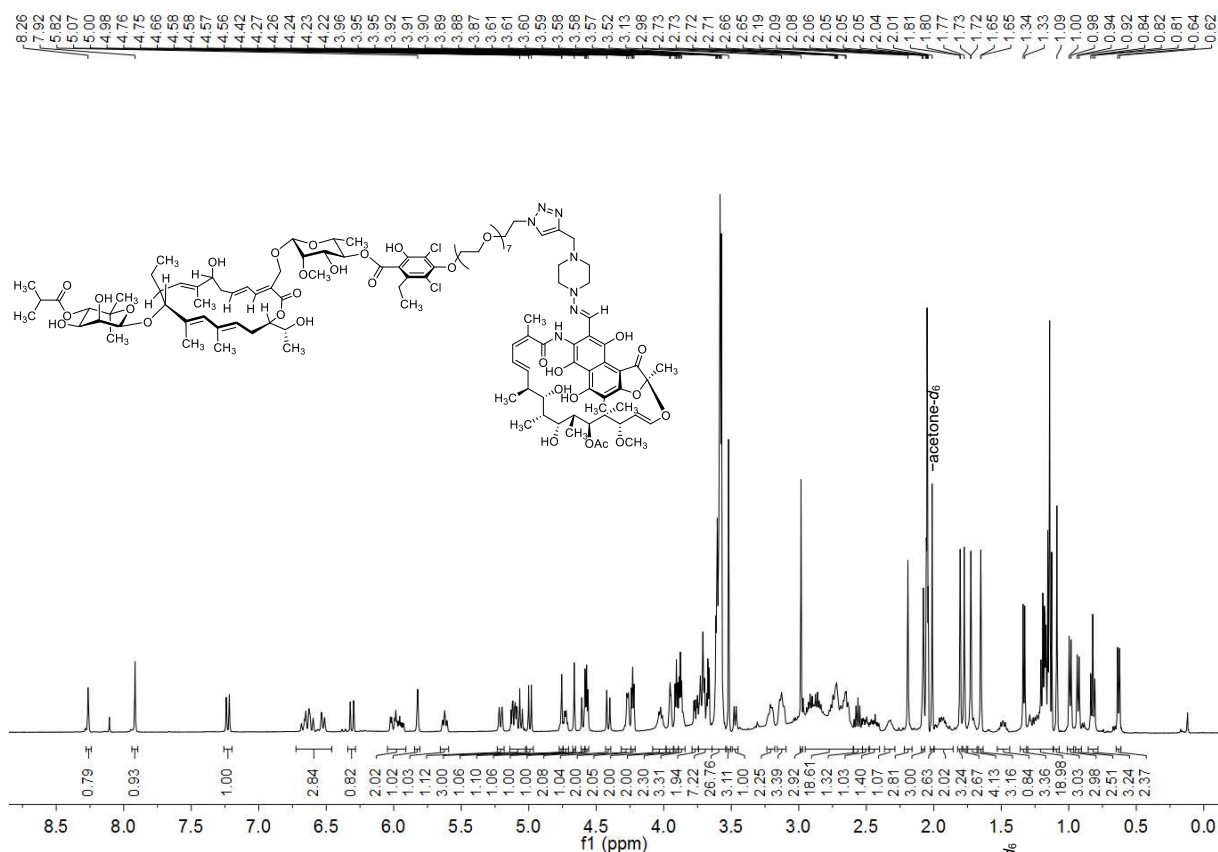

# <sup>13</sup>C NMR (150.94 MHz, 298 K, acetone-*d*<sub>6</sub>)

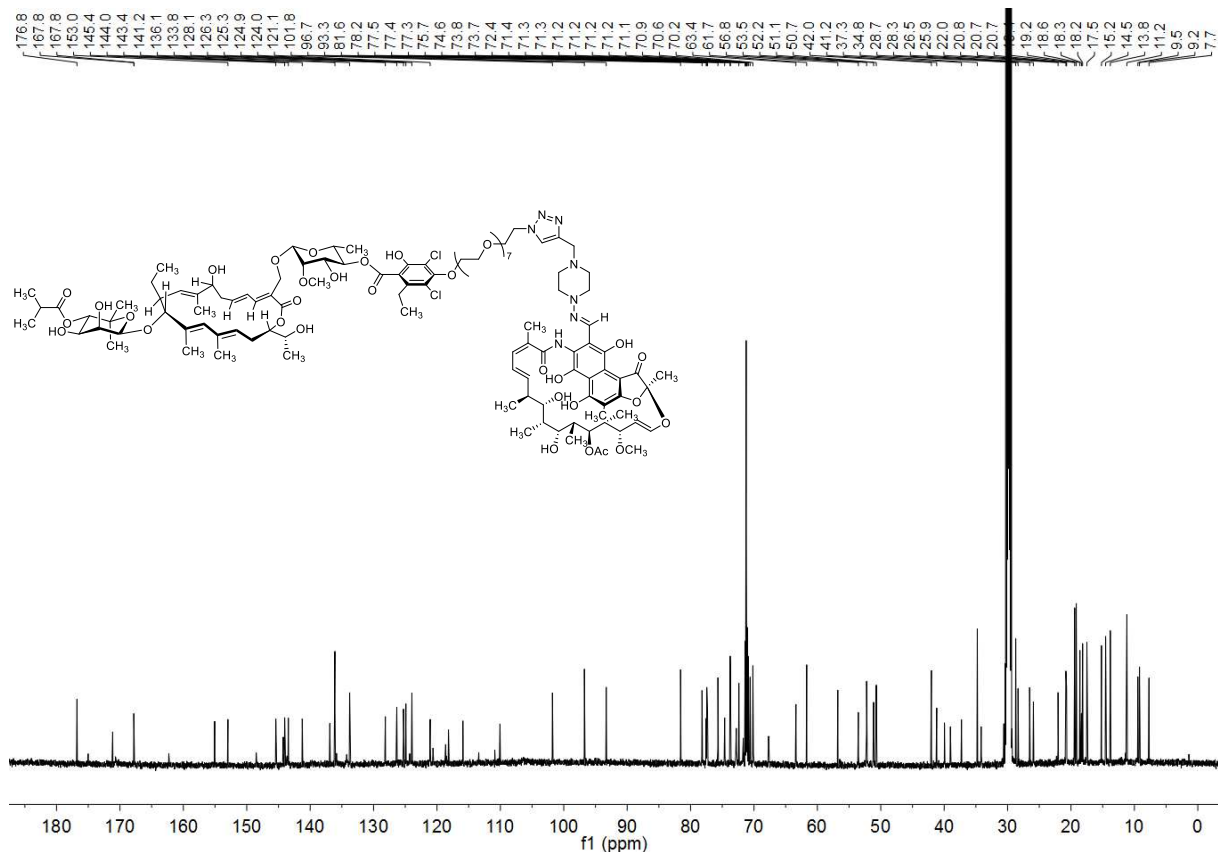

# <sup>13</sup>C NMR (150.94 MHz, 298 K, acetone-*d*<sub>6</sub>)

D:\Service Temp\gmQEx4089

Client: Berg

gmQEx4089 #26-30 RT: 0.31-0.33 AV: 2 SB: 22 0.07-0.29, 0.71-0.97 NL: 1.20E7

T: FTMS + p ESI Full lock ms [200.00-3000.00]

04.01.2017 13:38:22

(+)-HR-ESI-MS

Sample: rb290\_prepHPLC\_f15-18

Solvent: MeOH

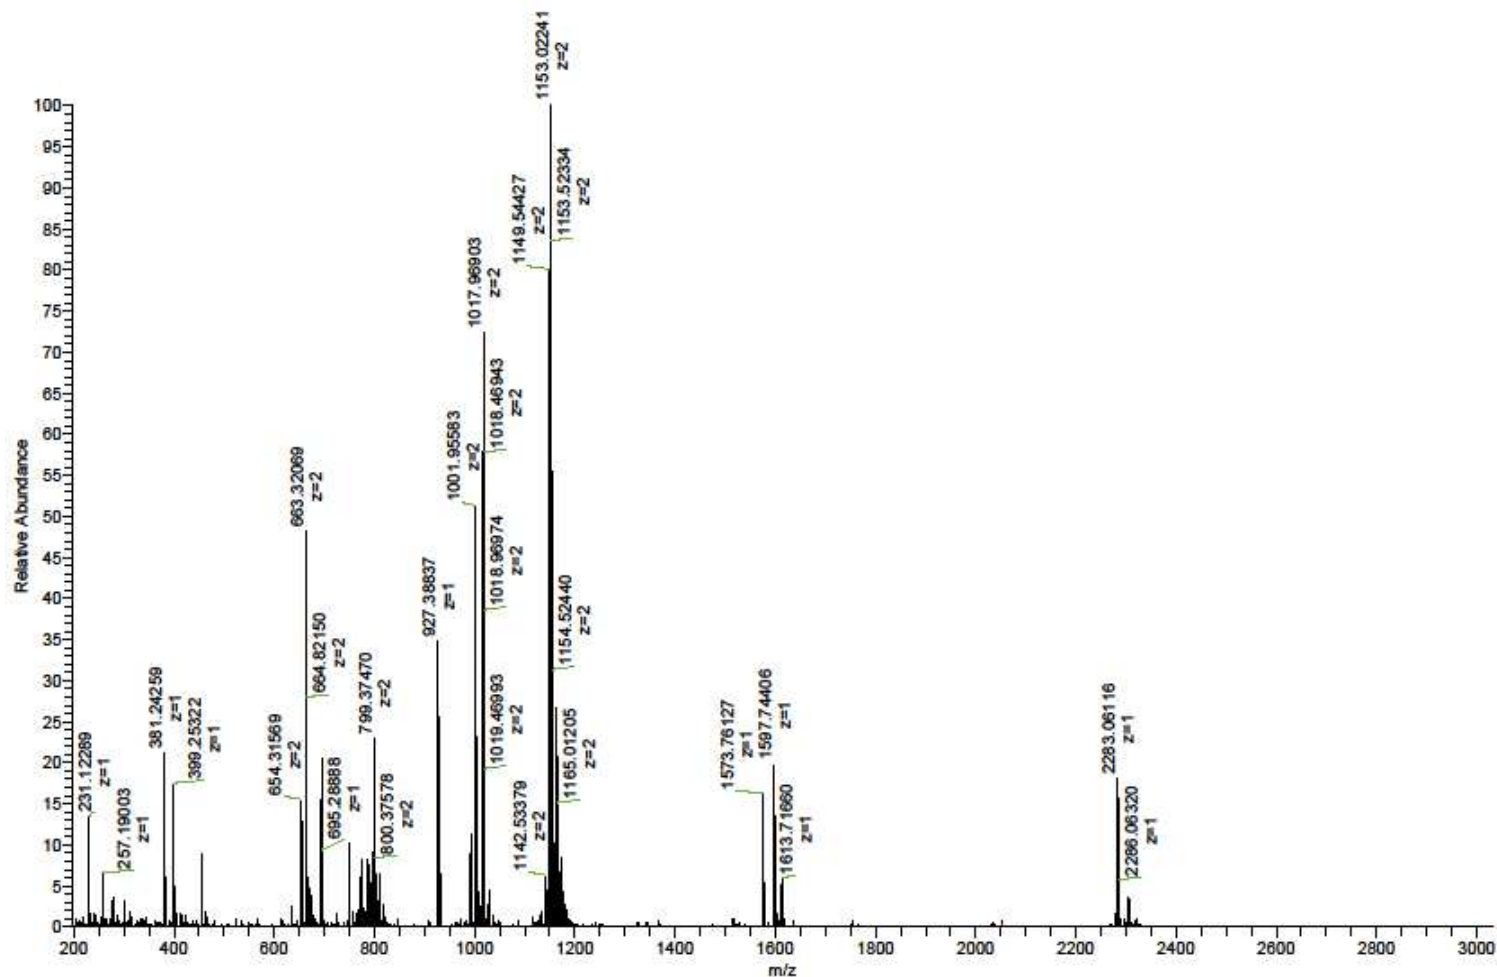

(+)-HR-ESI-MS spectrum of the Fdx-Rif hybrid species:  $m/z = 1149.54427$  can be assigned to the dication  $[M+NH_4+H]^{2+}$  of the Fdx-Rif hybrid  $C_{113}H_{163}Cl_2N_7O_{37}$ ,  $M_{exact} = 2280.04654$ .

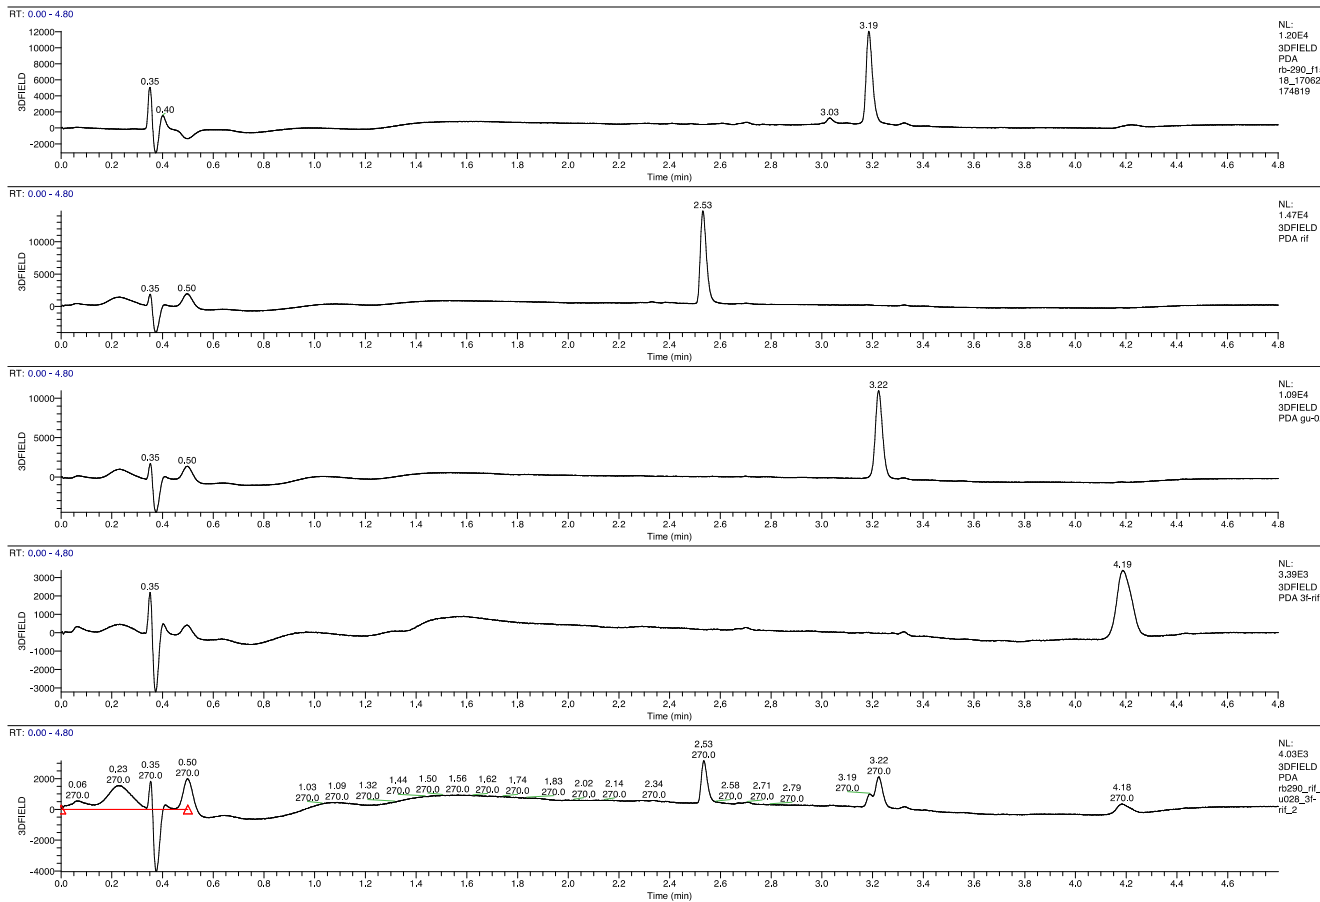

a) Fdx-Rif-Hybrid  
(50  $\mu\text{g mL}^{-1}$ , MeOH)

b) Rifampicin  
(50  $\mu\text{g mL}^{-1}$ , MeOH)

c) Rif-alkyne  
(50  $\mu\text{g mL}^{-1}$ , MeOH)

d) 3-Formylrifampicin  
(50  $\mu\text{g mL}^{-1}$ , MeOH)

e) Co-injection of a)–d)  
(10  $\mu\text{g mL}^{-1}$  per compound, MeOH)

UHPLC chromatograms of a) the Fdx-Rif hybrid (same sample as for biological testing) and plausible contaminants b) rifampicin; c) alkynylated rifampicin; d) 3-formylrifampicin. Part e) shows the resulting chromatogram from co-injection of aliquots of solutions from a)–d) [from a 50  $\mu\text{g mL}^{-1}$  sample of a)–d) was taken an aliquot sample of 200  $\mu\text{L}$  and 200  $\mu\text{L}$  MeOH was added to give a total sample volume of 1 mL with a concentration of 10  $\mu\text{g mL}^{-1}$  per compound).



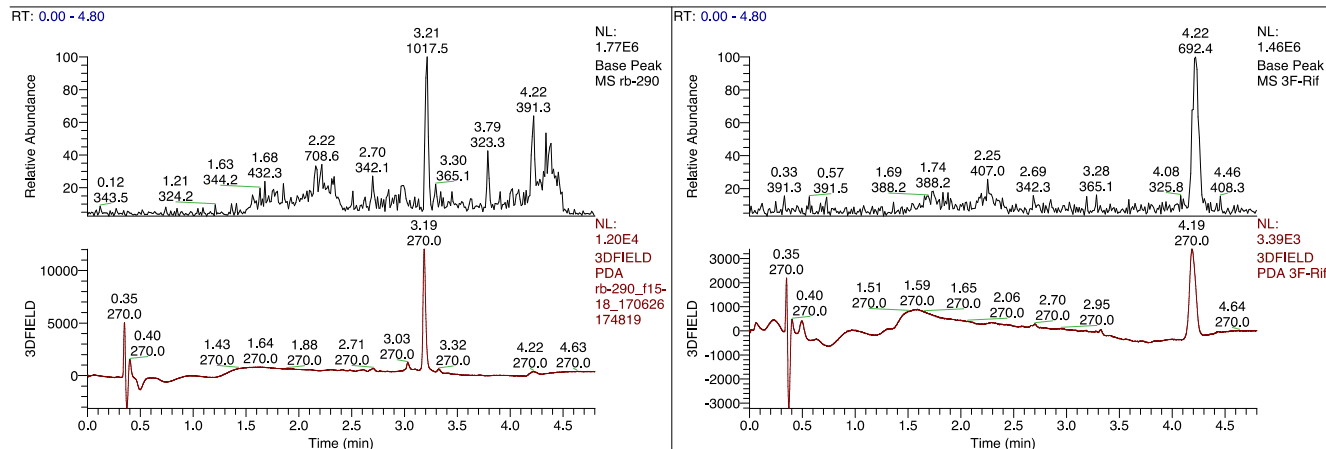

UHPLC chromatograms with UV trace

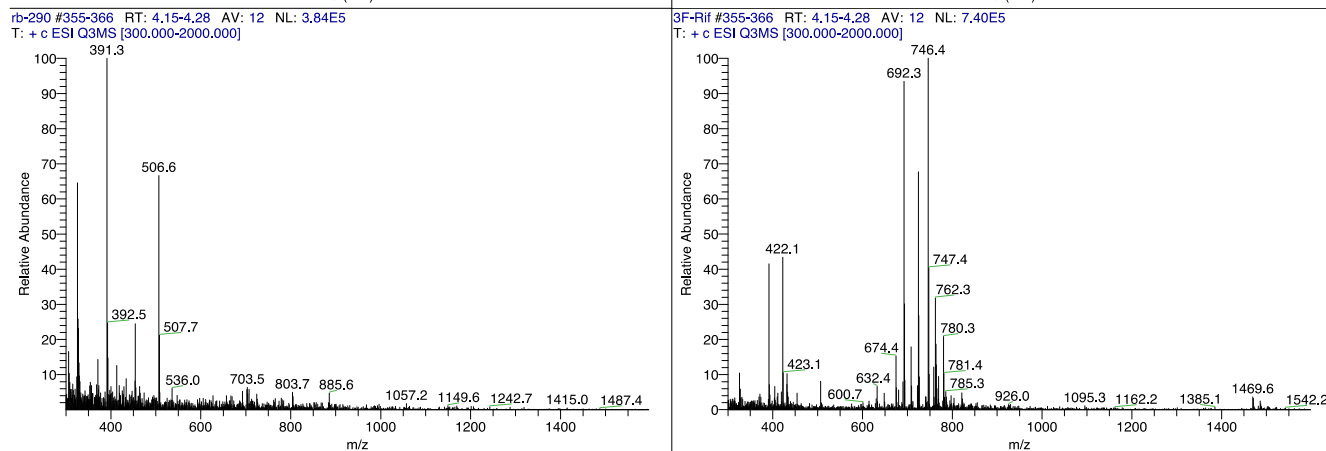

(+)-ESI-MS mass spectra at the indicated retention times

Chromatogram of the Fdx-Rif hybrid and (+)-ESI-MS spectrum of the peak at 4.15–4.28 min

Chromatogram of 3-formylrifampicin and (+)-ESI-MS spectrum of the peak at 4.15–4.28 min

Comparison of the UHPLC chromatograms and mass spectra of Fdx-Rif hybrid and 3-formylrifampicin: Although there is a minor bump at  $R_t = 4.22$  min in the UV trace of Fdx-Rif hybrid (left side), the mass spectrum of this peak is not the one expected for 3-formylrifampicin (right side).
